# Supplementary material for: Modeling Dynamics of Human Gut Microbiota Derived from Gluten Metabolism: Obtention, Maintenance and Characterization of Complex Microbial Communities
Source: MDPI journal article supplement (doi:10.3390/ijms25074013), 2024-04-04
Supplement: s1 [file s1]

Table S1. Data extracted from linear models performed for diversity analysis.

| Shannon: lm(passage 0 Vs passages 2-15) |                       |                           |                 |
|-----------------------------------------|-----------------------|---------------------------|-----------------|
|                                         | Coefficient passage 0 | Coefficient passages 2-15 | <i>p</i> -ANOVA |
| MCG-3                                   | 3.69                  | 3.26                      | 4.14E-03        |
| MCG-3B                                  | 3.67                  | 2.64                      | 1.07E-10        |

| PCoA        | lm (y~NDG presence) |                          |                         | lm (y~passage number) | lm (y~volunteer) |
|-------------|---------------------|--------------------------|-------------------------|-----------------------|------------------|
| Bray-Curtis | <i>p</i> -ANOVA     | Coefficient NDG presence | Coefficient NDG absence | <i>p</i> -ANOVA       | <i>p</i> -ANOVA  |
| Axis 1      | 2.68E-06            | -0.08                    | 0.08                    | 2.52E-01              | 1.70E-16         |
| Axis 2      | 1.87E-02            | 0.03                     | -0.03                   | 6.93E-01              | 6.31E-22         |
| Axis 3      | 6.19E-03            | -0.03                    | 0.03                    | 6.15E-01              | 5.44E-17         |

**Table S2. Data extracted from linear models performed for assessing the effect of passage number and NDG presence for taxa.** Table shows *p* FDR values obtained from multiple linear and linear mixed models performed for taxa from passage 2 to passage 15. "Model 1" was used for assessing significance of passage number and "Model 2" was used for studying significance for NDG presence, by performing ANOVAs over the models generated. A false discovery rate (FDR) correction for multiple comparisons was applied to *p* values obtained. Coefficients for NDG presence (MCG-3) and NDG absence (MCG-3B) obtained from "Model 2" allowed to know whether each taxa levels were higher or lower in NDG presence compared to NDG absence. Percentage of average reads for each taxa in NDG presence and in NDG absence, from passages 2 to 15, is also indicated. Log Fold CHange (LFC) was calculated as the base 2 logarithm of the ratio between the average relative abundance in NDG presence and absence.

| Taxa                        | Model 1 - lm(y~passage number)        |                                        | Model 2 - lmer(y~NDG presence+(1 volunteer)) |                                    |                                   | Average percentage of reads in MCG-3 for passages 2-15 | Average percentage of reads in MCG-3D for passages 2-15 | LFC       |
|-----------------------------|---------------------------------------|----------------------------------------|----------------------------------------------|------------------------------------|-----------------------------------|--------------------------------------------------------|---------------------------------------------------------|-----------|
|                             | <i>p</i> FDR passage number for MCG-3 | <i>p</i> FDR passage number for MCG-3B | <i>p</i> FDR                                 | Coefficient Model 2 - NDG presence | Coefficient Model 2 - NDG absence |                                                        |                                                         |           |
| P_Firmicutes                | 2.03E-01                              | 3.94E-01                               | 4.75E-05                                     | 37764.07                           | 30381.67                          | 3.82E+01                                               | 3.07E+01                                                | 3.14E-01  |
| C_Clostridia                | 3.32E-02                              | 5.22E-01                               | 8.51E-08                                     | 25041.41                           | 17222.31                          | 2.55E+01                                               | 1.75E+01                                                | 5.41E-01  |
| O_Clostridiales             | 3.32E-02                              | 5.22E-01                               | 8.51E-08                                     | 25041.41                           | 17222.31                          | 2.55E+01                                               | 1.76E+01                                                | 5.39E-01  |
| F_Lachnospiraceae           | 7.37E-01                              | 8.19E-01                               | 6.19E-04                                     | 13113.80                           | 10643.19                          | 1.35E+01                                               | 1.09E+01                                                | 3.06E-01  |
| G_Enterocloster             | 5.03E-01                              | 6.26E-01                               | 8.31E-08                                     | 2010.52                            | 3010.57                           | 2.31E+00                                               | 3.34E+00                                                | -5.31E-01 |
| G_Roseburia                 | 8.47E-01                              | 8.19E-01                               | 6.56E-03                                     | 2446.70                            | 1136.25                           | 2.81E+00                                               | 1.26E+00                                                | 1.16E+00  |
| G_Hungatella                | 8.43E-01                              | 5.22E-01                               | 8.93E-01                                     | 773.14                             | 782.08                            | 8.89E-01                                               | 8.68E-01                                                | 3.44E-02  |
| G_Dorea                     | 5.71E-01                              | 6.89E-01                               | 3.24E-02                                     | 386.80                             | 239.29                            | 4.45E-01                                               | 2.65E-01                                                | 7.44E-01  |
| G_Clostridium_XIVa          | 5.70E-01                              | 5.22E-01                               | 9.68E-03                                     | 251.59                             | 160.77                            | 2.89E-01                                               | 1.78E-01                                                | 6.97E-01  |
| G_Blautia                   | 7.35E-01                              | 8.89E-01                               | 2.76E-02                                     | 149.77                             | 110.51                            | 1.72E-01                                               | 1.23E-01                                                | 4.90E-01  |
| G_Eisenbergiella            | 8.83E-01                              | 5.99E-01                               | 2.00E-04                                     | 82.70                              | 130.25                            | 9.50E-02                                               | 1.45E-01                                                | -6.04E-01 |
| G_Anaerobutyricum           | 7.81E-01                              | 8.33E-01                               | 6.03E-01                                     | 28.03                              | 36.73                             | 3.22E-02                                               | 4.07E-02                                                | -3.39E-01 |
| G_Anaerotignum              | 9.17E-01                              | 5.48E-01                               | 3.88E-07                                     | 84.92                              | 8.28                              | 9.76E-02                                               | 9.18E-03                                                | 3.41E+00  |
| G_Anaerostipes              | 9.83E-01                              | 8.19E-01                               | 1.20E-01                                     | 16.68                              | 10.25                             | 1.92E-02                                               | 1.14E-02                                                | 7.53E-01  |
| G_Bariatricus               | 9.73E-01                              | 6.33E-01                               | 8.72E-01                                     | 33.84                              | 33.01                             | 3.89E-02                                               | 3.66E-02                                                | 8.68E-02  |
| G_Sellimonas                | 9.17E-01                              | 6.33E-01                               | 7.21E-02                                     | 17.25                              | 32.65                             | 1.98E-02                                               | 3.62E-02                                                | -8.70E-01 |
| G_Fusicatenibacter          | 7.37E-01                              | 8.19E-01                               | 6.32E-02                                     | 13.10                              | 8.45                              | 1.51E-02                                               | 9.38E-03                                                | 6.84E-01  |
| G_Mediterraneibacter        | 4.38E-01                              | 8.19E-01                               | 8.77E-03                                     | 25.98                              | 6.44                              | 2.99E-02                                               | 7.14E-03                                                | 2.06E+00  |
| G_Agathobacter              | 5.47E-01                              | 8.52E-01                               | 6.32E-02                                     | 12.63                              | 5.68                              | 1.45E-02                                               | 6.30E-03                                                | 1.20E+00  |
| G_Coprococcus               | 8.41E-01                              | 6.33E-01                               | 5.50E-01                                     | 3.22                               | 2.56                              | 3.70E-03                                               | 2.84E-03                                                | 3.81E-01  |
| G_Lachnospira               | 8.83E-01                              | 8.19E-01                               | 3.63E-01                                     | 2.32                               | 1.59                              | 2.67E-03                                               | 1.76E-03                                                | 5.98E-01  |
| G_Schaedlerella             | 9.17E-01                              | 5.22E-01                               | 6.02E-02                                     | 7.83                               | 0.77                              | 9.00E-03                                               | 8.51E-04                                                | 3.40E+00  |
| G_Kineothrix                | 7.82E-01                              | 5.22E-01                               | 4.96E-02                                     | 3.76                               | 0.51                              | 4.32E-03                                               | 5.63E-04                                                | 2.94E+00  |
| G_Lactonifactor             | 4.56E-01                              | 9.68E-01                               | 5.53E-03                                     | 2.53                               | 0.23                              | 2.90E-03                                               | 2.54E-04                                                | 3.52E+00  |
| G_Ruminococcus2             | 9.00E-01                              | 6.00E-01                               | 8.68E-02                                     | 0.86                               | 0.28                              | 9.93E-04                                               | 3.06E-04                                                | 1.70E+00  |
| F_Clostridiaceae_1          | 3.58E-02                              | 5.22E-01                               | 6.70E-07                                     | 8193.19                            | 3201.62                           | 8.42E+00                                               | 3.28E+00                                                | 1.36E+00  |
| G_Clostridium_sensu_stricto | 3.48E-02                              | 5.22E-01                               | 7.74E-07                                     | 7801.64                            | 3044.11                           | 8.97E+00                                               | 3.38E+00                                                | 1.41E+00  |
| F_Peptostreptococcaceae     | 9.00E-01                              | 5.22E-01                               | 1.34E-01                                     | 1448.66                            | 1884.69                           | 1.49E+00                                               | 1.93E+00                                                | -3.75E-01 |
| G_Paraclostridium           | 9.00E-01                              | 5.22E-01                               | 9.24E-02                                     | 1365.96                            | 1846.85                           | 1.57E+00                                               | 2.05E+00                                                | -3.84E-01 |
| G_Paeniclostridium          | 9.17E-01                              | 6.33E-01                               | 6.72E-01                                     | 18.62                              | 16.50                             | 2.14E-02                                               | 1.83E-02                                                | 2.25E-01  |
| G_Romboutsia                | 9.57E-01                              | 5.48E-01                               | 5.37E-02                                     | 59.34                              | 14.35                             | 6.82E-02                                               | 1.59E-02                                                | 2.10E+00  |
| F_Ruminococcaceae           | 9.56E-01                              | 7.36E-01                               | 6.99E-01                                     | 1062.26                            | 1003.40                           | 1.09E+00                                               | 1.03E+00                                                | 8.71E-02  |
| G_Faecalibacterium          | 8.93E-01                              | 7.25E-01                               | 6.32E-02                                     | 246.31                             | 123.48                            | 2.83E-01                                               | 1.37E-01                                                | 1.05E+00  |
| G_Flavonifractor            | 7.59E-01                              | 5.48E-01                               | 3.94E-01                                     | 211.85                             | 229.96                            | 2.43E-01                                               | 2.55E-01                                                | -6.73E-02 |
| G_Flintibacter              | 4.38E-01                              | 8.19E-01                               | 4.11E-01                                     | 72.09                              | 99.11                             | 8.29E-02                                               | 1.10E-01                                                | -4.08E-01 |
| G_Gemmiger                  | 9.00E-01                              | 8.19E-01                               | 6.83E-01                                     | 29.55                              | 26.02                             | 3.40E-02                                               | 2.89E-02                                                | 2.34E-01  |
| G_Lawsonibacter             | 4.76E-01                              | 5.58E-01                               | 8.42E-01                                     | 9.81                               | 10.57                             | 1.13E-02                                               | 1.17E-02                                                | -5.62E-02 |
| G_Dysosmobacter             | 4.38E-01                              | 5.22E-01                               | 1.18E-01                                     | 13.77                              | 24.30                             | 1.58E-02                                               | 2.70E-02                                                | -7.68E-01 |
| G_Intestinimonas            | 9.96E-01                              | 5.22E-01                               | 6.19E-04                                     | 20.70                              | 5.81                              | 2.38E-02                                               | 6.44E-03                                                | 1.88E+00  |
| G_Ruthenibacterium          | 9.00E-01                              | 5.22E-01                               | 5.37E-01                                     | 4.99                               | 4.26                              | 5.74E-03                                               | 4.72E-03                                                | 2.81E-01  |
| G_Oscillibacter             | 8.13E-01                              | 6.33E-01                               | 3.51E-03                                     | 6.04                               | 1.08                              | 6.94E-03                                               | 1.20E-03                                                | 2.54E+00  |
| G_Ruminococcus              | 7.82E-01                              | 8.52E-01                               | 3.41E-02                                     | 4.27                               | 0.97                              | 4.91E-03                                               | 1.07E-03                                                | 2.19E+00  |
| G_Pseudoflavonifractor      | 6.33E-01                              | 5.22E-01                               | 9.50E-01                                     | 1.70                               | 1.67                              | 1.96E-03                                               | 1.85E-03                                                | 8.16E-02  |
| F_Peptoniphilaceae          | 2.30E-01                              | 5.22E-01                               | 2.02E-03                                     | 731.54                             | 235.61                            | 7.51E-01                                               | 2.41E-01                                                | 1.64E+00  |
| G_Peptoniphilus             | 2.29E-01                              | 5.22E-01                               | 6.22E-03                                     | 673.50                             | 227.68                            | 7.74E-01                                               | 2.53E-01                                                | 1.62E+00  |
| G_Anaerococcus              | 7.82E-01                              | 5.22E-01                               | 4.65E-02                                     | 43.80                              | 5.05                              | 5.03E-02                                               | 5.61E-03                                                | 3.17E+00  |
| G_Finegoldia                | 9.00E-01                              | 6.33E-01                               | 3.61E-02                                     | 13.25                              | 2.43                              | 1.52E-02                                               | 2.70E-03                                                | 2.50E+00  |
| F_Eubacteriaceae            | 3.65E-02                              | 6.54E-01                               | 1.72E-02                                     | 44.64                              | 92.66                             | 4.58E-02                                               | 9.49E-02                                                | -1.05E+00 |
| G_Intestinibacillus         | 9.00E-01                              | 8.33E-01                               | 6.12E-05                                     | 7.13                               | 2.01                              | 8.20E-03                                               | 2.23E-03                                                | 1.88E+00  |
| G_Pseudoramibacter          | 2.77E-01                              | 5.22E-01                               | 1.75E-01                                     | 1.47                               | 2.90                              | 1.69E-03                                               | 3.22E-03                                                | -9.34E-01 |
| G_Eubacterium               | 9.00E-01                              | 5.22E-01                               | 1.62E-01                                     | 0.35                               | 1.70                              | 4.02E-04                                               | 1.88E-03                                                | -2.23E+00 |
| G_Bacilli                   | 9.83E-01                              | 5.48E-01                               | 3.94E-01                                     | 6359.85                            | 5768.79                           | 6.46E+00                                               | 5.86E+00                                                | 1.42E-01  |
| O_Lactobacillales           | 9.83E-01                              | 5.58E-01                               | 3.59E-01                                     | 6300.22                            | 5656.03                           | 6.42E+00                                               | 5.77E+00                                                | 1.55E-01  |
| F_Enterococcaceae           | 9.02E-01                              | 5.48E-01                               | 2.41E-01                                     | 4492.69                            | 5259.10                           | 4.61E+00                                               | 5.38E+00                                                | -2.22E-01 |
| G_Enterococcus              | 9.00E-01                              | 5.55E-01                               | 2.82E-01                                     | 4298.12                            | 4994.33                           | 4.94E+00                                               | 5.54E+00                                                | -1.66E-01 |
| F_Streptococcaceae          | 7.82E-01                              | 7.66E-01                               | 4.87E-05                                     | 1228.51                            | 83.89                             | 1.26E+00                                               | 8.59E-02                                                | 3.88E+00  |
| G_Streptococcus             | 7.82E-01                              | 7.66E-01                               | 4.87E-05                                     | 1228.51                            | 83.89                             | 1.41E+00                                               | 9.31E-02                                                | 3.92E+00  |
| F_Lactobacillaceae          | 8.43E-01                              | 5.22E-01                               | 1.89E-01                                     | 325.60                             | 143.67                            | 3.34E-01                                               | 1.47E-01                                                | 1.19E+00  |
| G_Limosilactobacillus       | 5.47E-01                              | 5.58E-01                               | 5.35E-01                                     | 160.98                             | 89.85                             | 1.85E-01                                               | 9.97E-02                                                | 8.92E-01  |
| G_Ligilactobacillus         | 9.56E-01                              | 9.56E-01                               | 3.46E-01                                     | 41.95                              | 25.27                             | 4.82E-02                                               | 2.80E-02                                                | 7.83E-01  |
| G_Lactobacillus             | 6.97E-01                              | 5.22E-01                               | 7.54E-02                                     | 118.88                             | 27.78                             | 1.37E-01                                               | 3.08E-02                                                | 2.15E+00  |
| F_Carnobacteriaceae         | 4.38E-01                              | 8.19E-01                               | 3.84E-01                                     | 0.90                               | 3.86                              | 9.29E-04                                               | 3.95E-03                                                | -2.09E+00 |
| G_Granulicatella            | 4.38E-01                              | 8.19E-01                               | 3.84E-01                                     | 0.90                               | 3.86                              | 1.04E-03                                               | 4.28E-03                                                | -2.04E+00 |
| C_Negativicutes             | 9.00E-01                              | 5.22E-01                               | 1.87E-01                                     | 5166.48                            | 6227.11                           | 5.25E+00                                               | 6.32E+00                                                | -2.68E-01 |
| O_Veillonellales            | 9.00E-01                              | 5.48E-01                               | 2.41E-01                                     | 4336.45                            | 5271.20                           | 4.42E+00                                               | 5.37E+00                                                | -2.82E-01 |
| F_Veillonellaceae           | 9.00E-01                              | 5.48E-01                               | 2.41E-01                                     | 4336.45                            | 5271.20                           | 4.45E+00                                               | 5.40E+00                                                | -2.77E-01 |
| G_Veillonella               | 9.17E-01                              | 5.22E-01                               | 2.54E-01                                     | 4078.76                            | 4999.77                           | 4.69E+00                                               | 5.55E+00                                                | -2.43E-01 |
| G_Dialister                 | 4.38E-01                              | 5.22E-01                               | 6.03E-01                                     | 158.78                             | 231.05                            | 1.82E-01                                               | 2.56E-01                                                | -4.90E-01 |
| G_Megasphaera               | 9.08E-01                              | 8.19E-01                               | 4.98E-02                                     | 25.86                              | 8.89                              | 2.97E-02                                               | 9.87E-03                                                | 1.59E+00  |
| G_Allisonella               | 9.00E-01                              | 7.27E-01                               | 8.61E-02                                     | 29.31                              | 13.34                             | 3.37E-02                                               | 1.48E-02                                                | 1.19E+00  |
| G_Negativicoccus            | 2.29E-01                              | 6.33E-01                               | 1.92E-01                                     | 34.25                              | 12.27                             | 3.94E-02                                               | 1.36E-02                                                | 1.53E+00  |
| O_Selenomonadales           | 5.00E-01                              | 5.22E-01                               | 6.63E-03                                     | 14.82                              | 4.63                              | 1.51E-02                                               | 4.72E-03                                                | 1.68E+00  |
| F_Selenomonadaceae          | 5.00E-01                              | 5.22E-01                               | 6.63E-03                                     | 14.82                              | 4.63                              | 1.52E-02                                               | 4.74E-03                                                | 1.68E+00  |
| G_Megamonas                 | 8.47E-01                              | 5.22E-01                               | 2.27E-02                                     | 9.69                               | 3.25                              | 1.11E-02                                               | 3.60E-03                                                | 1.63E+00  |
| G_Mitsuokella               | 5.84E-01                              | 8.19E-01                               | 1.97E-01                                     | 5.14                               | 1.38                              | 5.91E-03                                               | 1.53E-03                                                | 1.95E+00  |
| O_Acidaminococcales         | 9.00E-01                              | 8.19E-01                               | 6.01E-01                                     | 725.82                             | 816.58                            | 7.40E-01                                               | 8.33E-01                                                | -1.71E-01 |
| F_Acidaminococcaceae        | 9.00E-01                              | 8.19E-01                               | 6.01E-01                                     | 725.82                             | 816.58                            | 7.46E-01                                               | 8.36E-01                                                | -1.65E-01 |
| G_Phascolartobacterium      | 4.38E-01                              | 5.48E-01                               | 2.08E-03                                     | 289.18                             | 585.66                            | 3.32E-01                                               | 6.50E-01                                                | -9.67E-01 |
| G_Acidaminococcus           | 7.96E-01                              | 5.22E-01                               | 1.97E-01                                     | 434.35                             | 227.67                            | 4.99E-01                                               | 2.53E-01                                                | 9.83E-01  |
| C_Erysipelotrichia          | 9.00E-01                              | 5.22E-01                               | 9.50E-01                                     | 767.35                             | 754.98                            | 7.80E-01                                               | 7.67E-01                                                | 2.45E-02  |
| O_Erysipelotrichales        | 9.00E-01                              | 5.22E-01                               | 9.50E-01                                     | 767.35                             | 754.98                            | 7.82E-01                                               | 7.70E-01                                                | 2.27E-02  |
| F_Erysipelatoclostridiaceae | 8.83E-01                              | 5.22E-01                               | 3.94E-01                                     | 476.00                             | 661.90                            | 4.89E-01                                               | 6.78E-01                                                | -4.71E-01 |
| G_Erysipelatoclostridium    | 8.83E-01                              | 5.22E-01                               | 3.94E-01                                     | 476.00                             | 661.90                            | 5.47E-01                                               | 7.34E-01                                                | -4.25E-01 |
| F_Erysipelotrichaceae       | 9.46E-01                              | 5.22E-01                               | 3.41E-02                                     | 291.33                             | 93.07                             | 2.99E-01                                               | 9.53E-02                                                | 1.65E+00  |
| G_Catenibacterium           | 8.83E-01                              | 8.95E-01                               | 8.50E-01                                     | 31.62                              | 34.86                             | 3.63E-02                                               | 3.87E-02                                                | -8.98E-02 |
| G_Turcibacter               | 9.55E-01                              | 5.22E-01                               | 7.21E-02                                     | 134.15                             | 26.78                             | 1.54E-01                                               | 2.97E-02                                                | 2.38E+00  |
| G_Holdemanella              | 9.00E-01                              | 5.22E-01                               | 5.75E-03                                     | 6.79                               | 1.64                              | 7.80E-03                                               | 1.82E-03                                                | 2.10E+00  |

|                        |          |          |          |          |          |          |          |           |
|------------------------|----------|----------|----------|----------|----------|----------|----------|-----------|
| G_Faecalibaculum       | 9.00E-01 | 5.22E-01 | 1.57E-01 | 26.47    | 7.36     | 3.04E-02 | 8.16E-03 | 1.90E+00  |
| G_Solobacterium        | 4.56E-01 | 8.87E-01 | 4.17E-02 | 9.12     | 1.15     | 1.05E-02 | 1.28E-03 | 3.04E+00  |
| G_Allobaculum          | 9.56E-01 | 5.22E-01 | 4.27E-02 | 18.21    | 1.41     | 2.09E-02 | 1.57E-03 | 3.74E+00  |
| G_Faecalibacillus      | 7.82E-01 | 9.68E-01 | 1.55E-01 | 3.78     | 0.26     | 4.35E-03 | 2.93E-04 | 3.89E+00  |
| G_Holdemania           | 4.56E-01 | 8.45E-01 | 8.72E-01 | 2.58     | 2.72     | 2.96E-03 | 3.02E-03 | -2.55E-02 |
| G_Dielma               | 8.13E-01 | 5.22E-01 | 4.84E-03 | 1.93     | 0.14     | 2.22E-03 | 1.51E-04 | 3.88E+00  |
| P_Proteobacteria       | 2.29E-01 | 5.22E-01 | 2.37E-09 | 38083.11 | 48529.55 | 3.85E+01 | 4.91E+01 | -3.50E-01 |
| C_Gammaproteobacteria  | 2.29E-01 | 5.22E-01 | 1.20E-09 | 37544.54 | 48163.04 | 3.82E+01 | 4.89E+01 | -3.58E-01 |
| O_Enterobacterales     | 2.29E-01 | 5.22E-01 | 8.19E-10 | 37188.24 | 47906.09 | 3.79E+01 | 4.88E+01 | -3.66E-01 |
| F_Enterobacteriaceae   | 2.29E-01 | 5.22E-01 | 8.19E-10 | 37162.10 | 47841.09 | 3.82E+01 | 4.90E+01 | -3.60E-01 |
| G_Escherichia/Shigella | 2.29E-01 | 5.22E-01 | 8.19E-10 | 35398.98 | 46074.65 | 4.07E+01 | 5.11E+01 | -3.29E-01 |
| G_Pseudescherichia     | 9.90E-01 | 9.14E-01 | 8.72E-01 | 725.24   | 718.93   | 8.34E-01 | 7.98E-01 | 6.36E-02  |
| G_Enterobacter         | 4.38E-01 | 5.74E-01 | 5.01E-01 | 48.83    | 25.38    | 5.61E-02 | 2.82E-02 | 9.95E-01  |
| F_Morganellaceae       | 9.00E-01 | 5.22E-01 | 5.97E-02 | 4.22     | 19.85    | 4.34E-03 | 2.03E-02 | -2.23E+00 |
| G_Morganella           | 9.00E-01 | 5.22E-01 | 5.97E-02 | 4.22     | 19.85    | 4.85E-03 | 2.20E-02 | -2.18E+00 |
| F_Yersiniaceae         | 5.71E-01 | 8.87E-01 | 6.60E-01 | 0.45     | 0.66     | 4.65E-04 | 6.75E-04 | -5.39E-01 |
| G_Serratia             | 5.71E-01 | 8.87E-01 | 6.60E-01 | 0.45     | 0.66     | 5.20E-04 | 7.32E-04 | -4.93E-01 |
| O_Aeromonadales        | 8.83E-01 | 6.54E-01 | 9.30E-02 | 224.74   | 75.96    | 2.29E-01 | 7.75E-02 | 1.56E+00  |
| F_Succinivibrionaceae  | 8.83E-01 | 6.54E-01 | 9.30E-02 | 224.74   | 75.96    | 2.31E-01 | 7.78E-02 | 1.57E+00  |
| G_Succinivibrio        | 8.83E-01 | 6.54E-01 | 9.30E-02 | 224.74   | 75.96    | 2.58E-01 | 8.43E-02 | 1.62E+00  |
| O_Pasteurellales       | 6.37E-01 | 7.25E-01 | 3.94E-01 | 12.69    | 29.79    | 1.29E-02 | 3.04E-02 | -1.23E+00 |
| F_Pasteurellaceae      | 6.37E-01 | 7.25E-01 | 3.94E-01 | 12.69    | 29.79    | 1.30E-02 | 3.05E-02 | -1.23E+00 |
| G_Haemophilus          | 5.82E-01 | 7.27E-01 | 3.94E-01 | 9.30     | 27.17    | 1.07E-02 | 3.01E-02 | -1.50E+00 |
| G_Conservatibacter     | 9.00E-01 | 8.17E-01 | 3.94E-01 | 0.18     | 0.32     | 2.03E-04 | 3.57E-04 | -8.16E-01 |
| O_Nevskiales           | 6.97E-01 | 6.33E-01 | 2.14E-01 | 0.03     | 9.16     | 2.67E-05 | 9.34E-03 | -8.45E+00 |
| F_Nevskiaceae          | 6.97E-01 | 6.33E-01 | 2.14E-01 | 0.03     | 9.16     | 2.69E-05 | 9.38E-03 | -8.45E+00 |
| G_Nevskia              | 6.97E-01 | 6.33E-01 | 2.14E-01 | 0.03     | 9.16     | 3.01E-05 | 1.02E-02 | -8.40E+00 |
| O_Pseudomonadales      | NA       | 5.22E-01 | 1.75E-01 | 0.00     | 0.91     | 0.00E+00 | 9.32E-04 | #iNUM!    |
| F_Pseudomonadaceae     | NA       | 5.22E-01 | 1.75E-01 | 0.00     | 0.91     | 0.00E+00 | 9.36E-04 | #iNUM!    |
| G_Pseudomonas          | NA       | 5.22E-01 | 1.75E-01 | 0.00     | 0.91     | 0.00E+00 | 1.01E-03 | #iNUM!    |
| O_Xanthomonadales      | NA       | 5.62E-01 | 1.20E-01 | 0.00     | 1.75     | 0.00E+00 | 1.78E-03 | #iNUM!    |
| F_Rhodanobacteraceae   | NA       | 5.62E-01 | 1.20E-01 | 0.00     | 1.75     | 0.00E+00 | 1.79E-03 | #iNUM!    |
| G_Aquimonas            | NA       | 5.62E-01 | 1.20E-01 | 0.00     | 1.75     | 0.00E+00 | 1.94E-03 | #iNUM!    |
| C_Betaproteobacteria   | 8.97E-01 | 9.81E-01 | 7.54E-02 | 401.89   | 212.74   | 4.08E-01 | 2.16E-01 | 9.19E-01  |
| O_Burkholderiales      | 8.97E-01 | 8.19E-01 | 1.66E-02 | 401.79   | 169.11   | 4.09E-01 | 1.72E-01 | 1.25E+00  |
| F_Sutterellaceae       | 9.00E-01 | 5.22E-01 | 4.17E-04 | 376.29   | 78.40    | 3.87E-01 | 8.03E-02 | 2.27E+00  |
| G_Sutterella           | 9.00E-01 | 5.22E-01 | 6.19E-04 | 366.50   | 75.60    | 4.21E-01 | 8.39E-02 | 2.33E+00  |
| G_Parasutterella       | 9.10E-01 | 5.70E-01 | 9.93E-03 | 9.04     | 2.17     | 1.04E-02 | 2.40E-03 | 2.11E+00  |
| G_Duodenibacillus      | 5.84E-01 | 8.19E-01 | 7.23E-01 | 0.76     | 0.62     | 8.70E-04 | 6.92E-04 | 3.30E-01  |
| F_Burkholderiaceae     | 9.17E-01 | 6.58E-01 | 3.27E-01 | 25.41    | 55.37    | 2.61E-02 | 5.67E-02 | -1.12E+00 |
| G_Ralstonia            | 9.17E-01 | 6.58E-01 | 3.27E-01 | 25.41    | 55.37    | 2.92E-02 | 6.14E-02 | -1.07E+00 |
| F_Comamonadaceae       | 4.38E-01 | 6.54E-01 | 4.95E-02 | 0.09     | 28.10    | 9.29E-05 | 2.88E-02 | -8.27E+00 |
| G_Hydrogenophaga       | NA       | 7.89E-01 | 2.12E-01 | 0.00     | 2.46     | 0.00E+00 | 2.73E-03 | #iNUM!    |
| G_Piscinibacter        | NA       | 7.81E-01 | 1.12E-02 | 0.00     | 2.12     | 0.00E+00 | 2.35E-03 | #iNUM!    |
| G_Simplicispira        | NA       | 6.54E-01 | 2.41E-01 | 0.00     | 1.86     | 0.00E+00 | 2.06E-03 | #iNUM!    |
| O_Nitrosomonadales     | 9.00E-01 | 6.54E-01 | 4.17E-02 | 0.10     | 32.27    | 9.71E-05 | 3.29E-02 | -8.41E+00 |
| F_Methylophilaceae     | 6.97E-01 | 7.89E-01 | 3.17E-02 | 0.02     | 16.36    | 2.20E-05 | 1.68E-02 | -9.57E+00 |
| G_Methylophilus        | NA       | 8.32E-01 | 4.47E-02 | 0.00     | 8.21     | 0.00E+00 | 9.11E-03 | #iNUM!    |
| G_Methylothera         | NA       | 5.97E-01 | 2.38E-01 | 0.00     | 3.18     | 0.00E+00 | 3.53E-03 | #iNUM!    |
| F_Sterolibacteriaceae  | 6.97E-01 | 5.99E-01 | 7.95E-02 | 0.07     | 14.79    | 7.58E-05 | 1.51E-02 | -7.64E+00 |
| G_Methyloversatilis    | 6.97E-01 | 5.99E-01 | 7.95E-02 | 0.07     | 14.79    | 8.48E-05 | 1.64E-02 | -7.60E+00 |
| O_Neisseriales         | NA       | 8.19E-01 | 3.94E-01 | 0.00     | 4.61     | 0.00E+00 | 4.70E-03 | #iNUM!    |
| F_Neisseriaceae        | NA       | 8.19E-01 | 3.94E-01 | 0.00     | 4.61     | 0.00E+00 | 4.72E-03 | #iNUM!    |
| G_Neisseria            | NA       | 8.19E-01 | 3.94E-01 | 0.00     | 4.61     | 0.00E+00 | 5.11E-03 | #iNUM!    |
| O_Rhodocyclales        | NA       | 8.19E-01 | 2.41E-01 | 0.00     | 2.79     | 0.00E+00 | 2.85E-03 | #iNUM!    |
| F_Rhodocyclaceae       | NA       | 8.19E-01 | 2.41E-01 | 0.00     | 2.79     | 0.00E+00 | 2.86E-03 | #iNUM!    |
| G_Azospira             | NA       | 8.19E-01 | 2.41E-01 | 0.00     | 2.79     | 0.00E+00 | 3.10E-03 | #iNUM!    |
| C_Deltaproteobacteria  | 4.38E-01 | 8.83E-01 | 1.10E-01 | 36.03    | 72.27    | 3.66E-02 | 7.34E-02 | -1.00E+00 |
| O_Desulfovibrionales   | 4.38E-01 | 8.19E-01 | 2.20E-01 | 36.03    | 63.51    | 3.67E-02 | 6.48E-02 | -8.18E-01 |
| F_Desulfovibrionaceae  | 4.38E-01 | 8.19E-01 | 2.20E-01 | 36.03    | 63.51    | 3.70E-02 | 6.50E-02 | -8.13E-01 |
| G_Desulfovibrio        | 2.77E-01 | 8.19E-01 | 1.50E-01 | 25.32    | 56.56    | 2.91E-02 | 6.28E-02 | -1.11E+00 |
| G_Bilophila            | 4.38E-01 | 7.27E-01 | 4.18E-03 | 2.59     | 5.70     | 2.98E-03 | 6.33E-03 | -1.09E+00 |
| O_Myxococcales         | NA       | 6.54E-01 | 9.24E-02 | 0.00     | 6.40     | 0.00E+00 | 6.53E-03 | #iNUM!    |
| F_Polyangiaceae        | NA       | 8.30E-01 | 7.95E-02 | 0.00     | 3.97     | 0.00E+00 | 4.07E-03 | #iNUM!    |
| F_Kofleriaceae         | NA       | 5.22E-01 | 1.89E-01 | 0.00     | 2.43     | 0.00E+00 | 2.48E-03 | #iNUM!    |
| G_Kofleria             | NA       | 5.22E-01 | 1.89E-01 | 0.00     | 2.43     | 0.00E+00 | 2.69E-03 | #iNUM!    |
| C_Alphaproteobacteria  | 4.38E-01 | 6.33E-01 | 1.74E-01 | 0.18     | 40.12    | 1.86E-04 | 4.07E-02 | -7.77E+00 |
| O_Sphingomonadales     | 4.38E-01 | 6.33E-01 | 2.62E-01 | 0.18     | 14.12    | 1.87E-04 | 1.44E-02 | -6.27E+00 |
| F_Sphingomonadaceae    | 7.37E-01 | 6.33E-01 | 3.11E-01 | 0.02     | 12.57    | 2.45E-05 | 1.29E-02 | -9.04E+00 |
| G_Sphingomonas         | NA       | 6.33E-01 | 3.94E-01 | 0.00     | 9.73     | 0.00E+00 | 1.08E-02 | #iNUM!    |
| G_Sphingobium          | 7.37E-01 | 9.41E-01 | 3.02E-01 | 0.02     | 1.76     | 2.74E-05 | 1.95E-03 | -6.16E+00 |
| G_Aquisediminimonas    | NA       | 9.42E-01 | 1.57E-01 | 0.00     | 1.08     | 0.00E+00 | 1.20E-03 | #iNUM!    |
| F_Erythrobacteraceae   | 4.38E-01 | 9.06E-01 | 3.08E-01 | 0.16     | 1.55     | 1.64E-04 | 1.58E-03 | -3.27E+00 |
| O_Rhizobiales          | NA       | 5.99E-01 | 2.36E-01 | 0.00     | 16.98    | 0.00E+00 | 1.73E-02 | #iNUM!    |
| F_Methylobacteriaceae  | NA       | 6.33E-01 | 3.94E-01 | 0.00     | 9.77     | 0.00E+00 | 1.00E-02 | #iNUM!    |
| G_Methylobacterium     | NA       | 6.33E-01 | 3.94E-01 | 0.00     | 9.77     | 0.00E+00 | 1.08E-02 | #iNUM!    |
| F_Pleomorphomonadaceae | NA       | 5.99E-01 | 9.24E-02 | 0.00     | 5.79     | 0.00E+00 | 5.93E-03 | #iNUM!    |
| G_Oharaebacter         | NA       | 5.99E-01 | 9.24E-02 | 0.00     | 5.79     | 0.00E+00 | 6.42E-03 | #iNUM!    |
| O_Rhodospirillales     | NA       | 9.57E-01 | 4.47E-02 | 0.00     | 9.02     | 0.00E+00 | 9.20E-03 | #iNUM!    |
| F_Azospirillaceae      | NA       | 8.15E-01 | 4.27E-02 | 0.00     | 7.06     | 0.00E+00 | 7.23E-03 | #iNUM!    |
| G_Azospirillum         | NA       | 8.15E-01 | 4.27E-02 | 0.00     | 7.06     | 0.00E+00 | 7.83E-03 | #iNUM!    |
| F_Rhodospirillaceae    | NA       | 6.54E-01 | 3.27E-01 | 0.00     | 1.96     | 0.00E+00 | 2.01E-03 | #iNUM!    |
| G_Elstera              | NA       | 6.54E-01 | 3.27E-01 | 0.00     | 1.96     | 0.00E+00 | 2.17E-03 | #iNUM!    |
| P_Bacteroidetes        | 5.84E-01 | 5.96E-01 | 4.01E-01 | 20050.86 | 18758.06 | 2.03E+01 | 1.90E+01 | 9.61E-02  |
| C_Bacteroidia          | 5.84E-01 | 5.96E-01 | 4.01E-01 | 20050.86 | 18758.06 | 2.04E+01 | 1.91E+01 | 9.72E-02  |
| O_Bacteroidales        | 5.84E-01 | 5.96E-01 | 4.01E-01 | 20050.86 | 18758.06 | 2.04E+01 | 1.91E+01 | 9.54E-02  |
| F_Bacteroidaceae       | 7.93E-01 | 5.70E-01 | 8.20E-01 | 18939.72 | 18578.30 | 1.95E+01 | 1.90E+01 | 3.26E-02  |
| G_Bacteroides          | 8.43E-01 | 5.48E-01 | 5.18E-01 | 16392.03 | 17394.56 | 1.88E+01 | 1.93E+01 | -3.46E-02 |
| G_Phocaecicola         | 8.83E-01 | 5.22E-01 | 7.88E-04 | 1975.44  | 928.73   | 2.27E+00 | 1.03E+00 | 1.14E+00  |
| F_Prevotellaceae       | 2.77E-01 | 5.22E-01 | 3.98E-03 | 542.56   | 76.20    | 5.57E-01 | 7.80E-02 | 2.84E+00  |
| G_Prevotella           | 2.77E-01 | 5.22E-01 | 3.88E-03 | 534.83   | 70.70    | 6.15E-01 | 7.84E-02 | 2.97E+00  |
| G_Paraprevotella       | 9.00E-01 | 5.45E-01 | 6.02E-02 | 7.74     | 0.24     | 8.89E-03 | 2.62E-04 | 5.09E+00  |
| F_Porphyromonadaceae   | 8.83E-01 | 5.22E-01 | 3.58E-17 | 486.21   | 94.16    | 4.99E-01 | 9.64E-02 | 2.37E+00  |
| G_Parabacteroides      | 8.83E-01 | 5.22E-01 | 5.67E-18 | 486.21   | 87.59    | 5.59E-01 | 9.72E-02 | 2.52E+00  |
| G_Porphyromonas        | NA       | 8.19E-01 | 3.94E-01 | 0.00     | 6.57     | 0.00E+00 | 7.29E-03 | #iNUM!    |
| F_Muribaculaceae       | 8.13E-01 | 5.22E-01 | 6.70E-02 | 40.17    | 2.18     | 4.13E-02 | 2.23E-03 | 4.21E+00  |
| G_Muribaculum          | 9.83E-01 | NA       | 4.26E-02 | 2.61     | 0.00     | 3.00E-03 | 0.00E+00 | #iNUM!    |



|                       |          |          |          |         |        |          |          |           |
|-----------------------|----------|----------|----------|---------|--------|----------|----------|-----------|
| F_Rikenellaceae       | 8.41E-01 | 7.89E-01 | 1.20E-01 | 1.80    | 0.83   | 1.85E-03 | 8.51E-04 | 1.12E+00  |
| G_Alistipes           | 8.41E-01 | 7.89E-01 | 1.20E-01 | 1.80    | 0.83   | 2.07E-03 | 9.22E-04 | 1.17E+00  |
| F_Odoribacteraceae    | 9.17E-01 | 5.22E-01 | 1.74E-05 | 3.71    | 0.47   | 3.81E-03 | 4.78E-04 | 3.00E+00  |
| G_Odoribacter         | 9.41E-01 | 5.22E-01 | 2.08E-03 | 2.53    | 0.33   | 2.91E-03 | 3.62E-04 | 3.01E+00  |
| G_Butyricimonas       | 9.60E-01 | 6.54E-01 | 9.17E-03 | 1.17    | 0.14   | 1.35E-03 | 1.56E-04 | 3.11E+00  |
| F_Barnesiellaceae     | 9.17E-01 | 5.99E-01 | 3.95E-02 | 2.24    | 0.71   | 2.30E-03 | 7.26E-04 | 1.66E+00  |
| G_Barnesiella         | 9.17E-01 | 5.99E-01 | 3.95E-02 | 2.24    | 0.71   | 2.57E-03 | 7.87E-04 | 1.71E+00  |
| P_Actinobacteria      | 1.99E-02 | 5.22E-01 | 2.56E-02 | 2323.80 | 997.96 | 2.35E+00 | 1.01E+00 | 1.22E+00  |
| C_Coriobacteriia      | 8.73E-02 | 5.22E-01 | 2.66E-01 | 1289.05 | 735.09 | 1.31E+00 | 7.47E-01 | 8.11E-01  |
| O_Coriobacteriales    | 8.62E-02 | 5.22E-01 | 3.27E-01 | 1171.93 | 688.72 | 1.19E+00 | 7.02E-01 | 7.66E-01  |
| F_Coriobacteriaceae   | 8.62E-02 | 5.22E-01 | 3.27E-01 | 1161.05 | 679.47 | 1.19E+00 | 6.96E-01 | 7.78E-01  |
| G_Collinsella         | 1.27E-01 | 5.22E-01 | 2.88E-01 | 1054.57 | 563.55 | 1.21E+00 | 6.25E-01 | 9.55E-01  |
| G_Senegalimassilia    | 4.76E-01 | 5.48E-01 | 8.50E-01 | 100.78  | 112.79 | 1.16E-01 | 1.25E-01 | -1.11E-01 |
| F_Atopobiaceae        | 3.85E-01 | 5.22E-01 | 7.79E-01 | 9.18    | 8.03   | 9.43E-03 | 8.22E-03 | 1.98E-01  |
| G_Lancefieldella      | 8.41E-01 | 5.22E-01 | 3.63E-01 | 3.13    | 6.29   | 3.59E-03 | 6.98E-03 | -9.57E-01 |
| G_Olsenella           | 4.38E-01 | 7.25E-01 | 7.95E-02 | 6.05    | 1.74   | 6.95E-03 | 1.93E-03 | 1.85E+00  |
| O_Eggerthellales      | 9.00E-01 | 7.27E-01 | 8.77E-03 | 116.44  | 46.13  | 1.19E-01 | 4.70E-02 | 1.33E+00  |
| F_Eggerthellaceae     | 9.00E-01 | 7.27E-01 | 8.77E-03 | 116.44  | 46.13  | 1.20E-01 | 4.72E-02 | 1.34E+00  |
| G_Eggerthella         | 8.83E-01 | 9.42E-01 | 2.56E-02 | 87.10   | 31.07  | 1.00E-01 | 3.45E-02 | 1.54E+00  |
| G_Slackia             | 2.30E-01 | 5.48E-01 | 3.27E-01 | 26.15   | 13.73  | 3.01E-02 | 1.52E-02 | 9.80E-01  |
| G_Adlercreutzia       | 4.56E-01 | 5.22E-01 | 3.17E-02 | 2.75    | 0.88   | 3.16E-03 | 9.80E-04 | 1.69E+00  |
| C_Actinobacteria      | 8.62E-02 | 5.22E-01 | 1.49E-03 | 1034.75 | 262.86 | 1.05E+00 | 2.67E-01 | 1.98E+00  |
| O_Bifidobacteriales   | 8.62E-02 | 5.22E-01 | 1.43E-03 | 1034.70 | 259.08 | 1.05E+00 | 2.64E-01 | 2.00E+00  |
| F_Bifidobacteriaceae  | 8.62E-02 | 5.22E-01 | 1.43E-03 | 1034.70 | 259.08 | 1.06E+00 | 2.65E-01 | 2.00E+00  |
| G_Bifidobacterium     | 8.62E-02 | 5.22E-01 | 1.43E-03 | 883.97  | 222.77 | 1.02E+00 | 2.47E-01 | 2.04E+00  |
| O_Micrococcales       | 4.56E-01 | 8.19E-01 | 3.94E-01 | 0.05    | 3.79   | 4.85E-05 | 3.87E-03 | -6.32E+00 |
| F_Micrococcaceae      | 4.56E-01 | 8.19E-01 | 3.94E-01 | 0.05    | 3.79   | 4.89E-05 | 3.88E-03 | -6.31E+00 |
| G_Rothia              | 4.56E-01 | 8.19E-01 | 3.94E-01 | 0.05    | 3.79   | 5.47E-05 | 4.21E-03 | -6.26E+00 |
| P_Fusobacteria        | 4.38E-01 | 5.22E-01 | 3.59E-01 | 691.81  | 242.50 | 6.99E-01 | 2.45E-01 | 1.51E+00  |
| C_Fusobacteriia       | 4.38E-01 | 5.22E-01 | 3.59E-01 | 691.81  | 242.50 | 7.03E-01 | 2.46E-01 | 1.51E+00  |
| O_Fusobacteriales     | 4.38E-01 | 5.22E-01 | 3.59E-01 | 691.81  | 242.50 | 7.05E-01 | 2.47E-01 | 1.51E+00  |
| F_Fusobacteriaceae    | 4.38E-01 | 5.22E-01 | 3.60E-01 | 680.05  | 238.87 | 6.99E-01 | 2.45E-01 | 1.51E+00  |
| G_Fusobacterium       | 4.76E-01 | 5.53E-01 | 3.94E-01 | 0.68    | 1.15   | 7.77E-04 | 1.28E-03 | -7.15E-01 |
| P_Tenericutes         | 9.00E-01 | 5.55E-01 | 4.18E-01 | 3.58    | 1.85   | 3.62E-03 | 1.88E-03 | 9.49E-01  |
| C_Mollicutes          | 9.00E-01 | 5.55E-01 | 4.18E-01 | 3.58    | 1.85   | 3.64E-03 | 1.88E-03 | 9.50E-01  |
| O_Anaeroplasmatales   | 9.00E-01 | 5.55E-01 | 4.18E-01 | 3.58    | 1.85   | 3.65E-03 | 1.89E-03 | 9.48E-01  |
| F_Anaeroplasmataceae  | 9.00E-01 | 5.55E-01 | 4.18E-01 | 3.58    | 1.85   | 3.68E-03 | 1.90E-03 | 9.54E-01  |
| G_Anaeroplasma        | 9.00E-01 | 5.22E-01 | 4.74E-01 | 2.76    | 1.19   | 3.17E-03 | 1.32E-03 | 1.26E+00  |
| G_Asteroleplasma      | 8.43E-01 | 5.99E-01 | 7.19E-01 | 0.82    | 0.66   | 9.41E-04 | 7.34E-04 | 3.58E-01  |
| P_Verrucomicrobia     | 4.38E-01 | 9.68E-01 | 4.01E-01 | 1.19    | 0.75   | 1.20E-03 | 7.53E-04 | 6.70E-01  |
| C_Verrucomicrobiae    | 4.38E-01 | 9.68E-01 | 4.01E-01 | 1.19    | 0.75   | 1.21E-03 | 7.57E-04 | 6.71E-01  |
| O_Verrucomicrobiales  | 4.38E-01 | 9.68E-01 | 4.01E-01 | 1.19    | 0.75   | 1.21E-03 | 7.60E-04 | 6.69E-01  |
| F_Akkermansiaceae     | 4.38E-01 | 9.68E-01 | 4.01E-01 | 1.19    | 0.75   | 1.22E-03 | 7.63E-04 | 6.75E-01  |
| G_Akkermansia         | 4.38E-01 | 9.68E-01 | 4.01E-01 | 1.19    | 0.75   | 1.36E-03 | 8.27E-04 | 7.21E-01  |
| P_Euryarchaeota       | 4.38E-01 | 8.19E-01 | 5.50E-01 | 0.60    | 0.41   | 6.07E-04 | 4.16E-04 | 5.43E-01  |
| C_Methanobacteria     | 4.38E-01 | 8.19E-01 | 5.50E-01 | 0.60    | 0.41   | 6.10E-04 | 4.18E-04 | 5.44E-01  |
| O_Methanobacteriales  | 4.38E-01 | 8.19E-01 | 5.50E-01 | 0.60    | 0.41   | 6.11E-04 | 4.20E-04 | 5.42E-01  |
| F_Methanobacteriaceae | 4.38E-01 | 8.19E-01 | 5.50E-01 | 0.60    | 0.41   | 6.16E-04 | 4.22E-04 | 5.47E-01  |
| G_Methanobrevibacter  | 4.38E-01 | 8.19E-01 | 5.50E-01 | 0.60    | 0.41   | 6.90E-04 | 4.57E-04 | 5.94E-01  |

| Significance for passage number (Model 1) |                    |                     |
|-------------------------------------------|--------------------|---------------------|
|                                           | pFDR<0.05 in MCG-3 | pFDR<0.05 in MCG-3B |
| Number of Taxa                            | 6                  | 0                   |
| Percentage of Taxa                        | 2.58%              | 0.00%               |
| Total number of Taxa                      | 233                |                     |

Number and percentage of taxa significantly affected by passage number

| Significance for NDG presence (Model 2) |           |           |            |
|-----------------------------------------|-----------|-----------|------------|
|                                         | pFDR<0.05 | pFDR<0.01 | pFDR<0.001 |
| Number of Taxa                          | 75        | 48        | 24         |
| Percentage of Taxa                      | 32.19%    | 20.60%    | 10.30%     |
| Total number of Taxa                    | 233       |           |            |

Number and percentage of taxa significantly affected by NDG presence

**Table S3. Data extracted from linear models performed for assessing the effect of passage number and NDG presence for OTUs.** Table shows *p* FDR values obtained from multiple linear and linear mixed models performed for OTUs from passage 2 to passage 15. "Model 1" was used for assessing significance of passage number and "Model 2" was used for studying significance for NDG presence, by performing ANOVAs over the models generated. A false discovery rate (FDR) correction for multiple comparisons was applied to *p* values obtained. Coefficients for NDG presence (MCG-3) and NDG absence (MCG-3B) obtained from "Model 2" allowed to know whether OTUs levels were higher or lower in NDG presence compared to NDG absence.

|           | Model 1 - lm(y~passage number)        |                                        | Model 2 - lmer(y~NDG presence+(1 volunteer)) |                                    |                                   |                                     |                                                                                                                 |
|-----------|---------------------------------------|----------------------------------------|----------------------------------------------|------------------------------------|-----------------------------------|-------------------------------------|-----------------------------------------------------------------------------------------------------------------|
| OTUs      | <i>p</i> FDR passage number for MCG-3 | <i>p</i> FDR passage number for MCG-3B | <i>p</i> FDR                                 | Coefficient Model 2 - NDG presence | Coefficient Model 2 - NDG absence | BLAST best hit                      | RDP classification                                                                                              |
| OTU_1     | 7.07E-01                              | 6.04E-01                               | 4.81E-09                                     | 35057.59                           | 45785.42                          | Pseudescherichia_vulneris_100       | Bacteria_Proteobacteria_Gammaproteobacteria_Enterobacterales_Enterobacteriaceae_Escherichia/Shigella_100        |
| OTU_9     | 8.74E-01                              | 6.04E-01                               | 7.05E-08                                     | 3858.01                            | 7645.33                           | Bacteroides_faecis_100              | Bacteria_Bacteroidetes_Bacteroidia_Bacteroidales_Bacteroidaceae_Bacteroides_100                                 |
| OTU_6     | 9.38E-01                              | 7.20E-01                               | 3.51E-01                                     | 3918.32                            | 4451.56                           | Enterococcus_hirae_100              | Bacteria_Firmicutes_Bacilli_Lactobacillales_Enterococcaceae_Enterococcus_100                                    |
| OTU_3     | 7.07E-01                              | 6.04E-01                               | 1.11E-04                                     | 6898.71                            | 2859.15                           | Clostridium_perfringens_100         | Bacteria_Firmicutes_Clostridia_Clostridiales_Clostridiaceae_1_Clostridium sensu stricto_99                      |
| OTU_20    | 8.18E-01                              | 6.14E-01                               | 1.72E-02                                     | 2564.51                            | 4100.24                           | Veillonella_dispar_100              | Bacteria_Firmicutes_Negativicutes_Veillonellales_Veillonellaceae_Veillonella_100                                |
| OTU_5     | 9.99E-01                              | 9.12E-01                               | 5.26E-03                                     | 567.02                             | 4408.57                           | Bacteroides_fragilis_100            | Bacteria_Bacteroidetes_Bacteroidia_Bacteroidales_Bacteroidaceae_Bacteroides_100                                 |
| OTU_35    | 7.07E-01                              | 7.38E-01                               | 4.27E-06                                     | 1611.93                            | 2472.28                           | Enterocloster_clostridioformis_100  | Bacteria_Firmicutes_Clostridia_Clostridiales_Lachnospiraceae_Enterocloster_100                                  |
| OTU_13    | 9.83E-01                              | 6.04E-01                               | 2.34E-02                                     | 2186.88                            | 1588.57                           | Kineothrix_alysoides_98             | Bacteria_Firmicutes_Clostridia_Clostridiales_Lachnospiraceae_Clostridium XIVa_63                                |
| OTU_10    | 7.07E-01                              | 6.04E-01                               | 5.70E-09                                     | 3874.71                            | 614.94                            | Bacteroides_uniformis_100           | Bacteria_Bacteroidetes_Bacteroidia_Bacteroidales_Bacteroidaceae_Bacteroides_100                                 |
| OTU_15    | 8.74E-01                              | 6.04E-01                               | 4.07E-05                                     | 1712.43                            | 468.47                            | Phocaeicola_vulgatus_100            | Bacteria_Bacteroidetes_Bacteroidia_Bacteroidales_Bacteroidaceae_Phocaeicola_100                                 |
| OTU_8     | 8.67E-01                              | 8.79E-01                               | 5.66E-03                                     | 2316.87                            | 1055.54                           | Roseburia_inulinivorans_100         | Bacteria_Firmicutes_Clostridia_Clostridiales_Lachnospiraceae_Roseburia_100                                      |
| OTU_14    | 9.32E-01                              | 6.05E-01                               | 9.78E-02                                     | 1230.77                            | 1631.39                           | Paraclostridium_benzoelyticum_100   | Bacteria_Firmicutes_Clostridia_Clostridiales_Peptostreptococcaceae_Paraclostridium_100                          |
| OTU_21    | 9.46E-01                              | 9.46E-01                               | 1.45E-01                                     | 1428.49                            | 1710.52                           | Bacteroides_kribbi_100              | Bacteria_Bacteroidetes_Bacteroidia_Bacteroidales_Bacteroidaceae_Bacteroides_100                                 |
| OTU_12    | 7.07E-01                              | 6.04E-01                               | 2.94E-01                                     | 924.40                             | 506.66                            | Collinsella_aerofaciens_100         | Bacteria_Actinobacteria_Coriobacteriia_Coriobacteriales_Coriobacteriaceae_Collinsella_100                       |
| OTU_17    | 9.16E-01                              | 7.70E-01                               | 2.75E-02                                     | 1391.60                            | 919.73                            | Coprococcus_comes_100               | Bacteria_Firmicutes_Clostridia_Clostridiales_Lachnospiraceae_Coprococcus_69                                     |
| OTU_2     | 7.07E-01                              | 7.51E-01                               | 1.21E-02                                     | 2161.92                            | 128.66                            | Bacteroides_stercoris_100           | Bacteria_Bacteroidetes_Bacteroidia_Bacteroidales_Bacteroidaceae_Bacteroides_100                                 |
| OTU_46    | 9.67E-01                              | 6.73E-01                               | 1.39E-03                                     | 1038.81                            | 747.47                            | Clostridium_symbiosum_98            | Bacteria_Firmicutes_Clostridia_Clostridiales_Lachnospiraceae_Clostridium XIVa_65                                |
| OTU_7     | 7.07E-01                              | 9.41E-01                               | 2.08E-03                                     | 533.63                             | 89.85                             | Bifidobacterium_catenulatum_100     | Bacteria_Actinobacteria_Actinobacteria_Bifidobacteriales_Bifidobacteriaceae_Bifidobacterium_100                 |
| OTU_40    | 8.97E-01                              | 6.04E-01                               | 8.43E-01                                     | 695.42                             | 709.77                            | Hungatella_hathewayi_100            | Bacteria_Firmicutes_Clostridia_Clostridiales_Lachnospiraceae_Hungatella_96                                      |
| OTU_31    | 7.07E-01                              | 6.63E-01                               | 2.94E-01                                     | 419.69                             | 522.68                            | Enterocloster_clostridioformis_96   | Bacteria_Firmicutes_Clostridia_Clostridiales_Lachnospiraceae_Butyrvibrio_33                                     |
| OTU_4     | 7.07E-01                              | 6.04E-01                               | 3.44E-01                                     | 635.40                             | 224.60                            | Fusobacterium_perfoetens_95         | Bacteria_Fusobacteria_Fusobacteriia_Fusobacteriales_Fusobacteriaceae_99_Fusobacterium_38                        |
| OTU_56    | 7.16E-01                              | 6.10E-01                               | 7.33E-03                                     | 676.65                             | 225.23                            | Veillonella_atypica_100             | Bacteria_Firmicutes_Negativicutes_Veillonellales_Veillonellaceae_Veillonella_100                                |
| OTU_131   | 7.76E-01                              | 8.82E-01                               | 1.36E-03                                     | 770.03                             | 317.10                            | Bacteroides_xylanisolvens_99        | Bacteria_Bacteroidetes_Bacteroidia_Bacteroidales_Bacteroidaceae_Bacteroides_100                                 |
| OTU_27    | 8.48E-01                              | 6.04E-01                               | 4.18E-01                                     | 401.20                             | 541.18                            | Erysipelatoclostridium_ramosum_100  | Bacteria_Firmicutes_Erysipelotrichia_Erysipelotrichales_Erysipelatoclostridiaceae_Erysipelatoclostridium_100    |
| OTU_32    | 7.07E-01                              | 6.04E-01                               | 1.08E-02                                     | 579.96                             | 191.29                            | Peptoniphilus_phocensis_100         | Bacteria_Firmicutes_Clostridia_Clostridiales_Peptoniphilaceae_Peptoniphilus_100                                 |
| OTU_42    | 7.12E-01                              | 6.04E-01                               | 5.43E-04                                     | 209.83                             | 499.96                            | Phascolarctobacterium_faecium_100   | Bacteria_Firmicutes_Negativicutes_Acidaminococcales_Acidaminococcaceae_Phascolarctobacterium_100                |
| OTU_23    | 7.59E-01                              | 7.73E-01                               | 2.07E-02                                     | 328.92                             | 188.31                            | Dorea_longicatena_100               | Bacteria_Firmicutes_Clostridia_Clostridiales_Lachnospiraceae_Dorea_100                                          |
| OTU_120   | 9.99E-01                              | 9.70E-01                               | 1.07E-04                                     | 280.84                             | 363.20                            | Pseudescherichia_vulneris_98        | Bacteria_Proteobacteria_95_Gammaproteobacteria_95_Enterobacterales_95_Enterobacteriaceae_94_Pseudescherichia_72 |
| OTU_29    | 8.25E-01                              | 6.04E-01                               | 1.43E-01                                     | 410.59                             | 202.14                            | Acidaminococcus_fermentans_97       | Bacteria_Firmicutes_Negativicutes_Acidaminococcales_Acidaminococcaceae_Acidaminococcus_100                      |
| OTU_33    | 9.10E-01                              | 8.14E-01                               | 4.92E-02                                     | 218.34                             | 102.19                            | Faecalibacterium_prausnitzii_99     | Bacteria_Firmicutes_Clostridia_Clostridiales_Ruminococcaceae_Faecalibacterium_100                               |
| OTU_80    | 7.12E-01                              | 6.83E-01                               | 6.03E-06                                     | 578.49                             | 140.17                            | Bacteroides_finegoldii_98           | Bacteria_Bacteroidetes_Bacteroidia_Bacteroidales_Bacteroidaceae_Bacteroides_100                                 |
| OTU_16    | 7.57E-01                              | 6.04E-01                               | 3.05E-02                                     | 724.43                             | 20.89                             | Clostridium_cadaveris_100           | Bacteria_Firmicutes_Clostridia_Clostridiales_Clostridiaceae_1_Clostridium sensu stricto_99                      |
| OTU_30    | 1.00E+00                              | 9.53E-01                               | 2.53E-03                                     | 56.39                              | 157.65                            | Phocaeicola_coprophilus_100         | Bacteria_Bacteroidetes_Bacteroidia_Bacteroidales_Bacteroidaceae_Phocaeicola_100                                 |
| OTU_34    | 7.07E-01                              | 8.68E-01                               | 6.27E-04                                     | 678.60                             | 37.92                             | Streptococcus_parasanguinis_100     | Bacteria_Firmicutes_Bacilli_Lactobacillales_Streptococcaceae_Streptococcus_100                                  |
| OTU_423   | 8.16E-01                              | 8.36E-01                               | 6.69E-03                                     | 282.44                             | 416.32                            | Bacteroides_thetaiotaomicron_98     | Bacteria_Bacteroidetes_Bacteroidia_Bacteroidales_Bacteroidaceae_Bacteroides_100                                 |
| OTU_162   | 8.25E-01                              | 7.38E-01                               | 3.79E-01                                     | 247.65                             | 234.68                            | Pseudescherichia_vulneris_97        | Bacteria_Proteobacteria_Gammaproteobacteria_Enterobacterales_Enterobacteriaceae_Escherichia/Shigella_88         |
| OTU_19    | 7.07E-01                              | 6.04E-01                               | 5.91E-02                                     | 295.58                             | 61.97                             | Prevotella_histicola_94             | Bacteria_Bacteroidetes_Bacteroidia_Bacteroidales_Prevotellaceae_Prevotella_99                                   |
| OTU_36    | 8.83E-01                              | 6.52E-01                               | 7.73E-01                                     | 163.36                             | 168.76                            | Flavonifractor_plautii_100          | Bacteria_Firmicutes_Clostridia_Clostridiales_Ruminococcaceae_Flavonifractor_100                                 |
| OTU_7572  | 8.25E-01                              | 9.57E-01                               | 1.33E-01                                     | 277.78                             | 216.72                            | Bacteroides_xylanisolvens_100       | Bacteria_Bacteroidetes_Bacteroidia_Bacteroidales_Bacteroidaceae_Bacteroides_100                                 |
| OTU_52    | 7.07E-01                              | 6.62E-01                               | 3.02E-02                                     | 113.34                             | 286.00                            | Faecalibacterium_prausnitzii_95     | Bacteria_Firmicutes_Clostridia_Clostridiales_Ruminococcaceae_Faecalibacterium_47                                |
| OTU_24    | 9.08E-01                              | 7.73E-01                               | 7.60E-02                                     | 210.74                             | 69.68                             | Succinivibrio_dextrinosolvens_97    | Bacteria_Proteobacteria_Gammaproteobacteria_Aeromonadales_Succinivibrionaceae_Succinivibrio_100                 |
| OTU_25    | 8.20E-01                              | 6.04E-01                               | 6.45E-02                                     | 263.43                             | 14.79                             | Streptococcus_salivarius_100        | Bacteria_Firmicutes_Bacilli_Lactobacillales_Streptococcaceae_Streptococcus_100                                  |
| OTU_85    | 8.53E-01                              | 8.64E-01                               | 1.33E-02                                     | 147.99                             | 210.33                            | Enterocloster_aldenensis_100        | Bacteria_Firmicutes_Clostridia_Clostridiales_Lachnospiraceae_Enterocloster_94                                   |
| OTU_4781  | 7.07E-01                              | 9.25E-01                               | 2.94E-02                                     | 272.17                             | 158.11                            | Bacteroides_xylanisolvens_98        | Bacteria_Bacteroidetes_Bacteroidia_Bacteroidales_Bacteroidaceae_Bacteroides_100                                 |
| OTU_60    | 8.85E-01                              | 6.04E-01                               | 4.19E-09                                     | 271.75                             | 44.27                             | Parabacteroides_distasonis_100      | Bacteria_Bacteroidetes_Bacteroidia_Bacteroidales_Porphyromonadaceae_Parabacteroides_100                         |
| OTU_37    | 7.07E-01                              | 6.04E-01                               | 5.03E-01                                     | 119.99                             | 216.20                            | Dialister_succinatiphilus_97        | Bacteria_Firmicutes_Negativicutes_Veillonellales_Veillonellaceae_Dialister_100                                  |
| OTU_59    | 9.93E-01                              | 8.73E-01                               | 9.99E-01                                     | 206.99                             | 206.89                            | Bacteroides_cellulosilyticus_100    | Bacteria_Bacteroidetes_Bacteroidia_Bacteroidales_Bacteroidaceae_Bacteroides_100                                 |
| OTU_26    | 7.10E-01                              | 7.08E-01                               | 7.02E-01                                     | 129.46                             | 83.50                             | Limosilactobacillus_mucosae_100     | Bacteria_Firmicutes_Bacilli_Lactobacillales_Lactobacillaceae_Limosilactobacillus_100                            |
| OTU_1839  | 7.70E-01                              | 6.50E-01                               | 3.96E-01                                     | 161.99                             | 129.61                            | Veillonella_atypica_98              | Bacteria_Firmicutes_Negativicutes_Veillonellales_Veillonellaceae_Veillonella_100                                |
| OTU_38    | 9.78E-01                              | 6.37E-01                               | 2.07E-02                                     | 43.38                              | 109.65                            | Phocaeicola_plebeius_100            | Bacteria_Bacteroidetes_Bacteroidia_Bacteroidales_Bacteroidaceae_Phocaeicola_100                                 |
| OTU_10582 | 7.88E-01                              | 6.04E-01                               | 1.40E-02                                     | 104.99                             | 152.57                            | Enterococcus_faecalis_98            | Bacteria_Firmicutes_Bacilli_Lactobacillales_99_Enterococcaceae_99_Enterococcus_88                               |
| OTU_66    | 7.57E-01                              | 6.04E-01                               | 9.35E-03                                     | 203.67                             | 117.63                            | Clostridium_scindens_100            | Bacteria_Firmicutes_Clostridia_Clostridiales_Lachnospiraceae_Clostridium XIVa_100                               |
| OTU_657   | 8.57E-01                              | 9.34E-01                               | 7.71E-04                                     | 126.82                             | 187.81                            | Bacteroides_thetaiotaomicron_99     | Bacteria_Bacteroidetes_Bacteroidia_Bacteroidales_Bacteroidaceae_Bacteroides_100                                 |
| OTU_119   | 7.81E-01                              | 6.04E-01                               | 1.69E-05                                     | 234.36                             | 61.14                             | Clostridium_perfringens_96          | Bacteria_Firmicutes_Clostridia_Clostridiales_Lachnospiraceae_45_Mobilitalea_5                                   |
| OTU_143   | 9.74E-01                              | 6.04E-01                               | 1.54E-06                                     | 75.65                              | 129.51                            | Pseudescherichia_vulneris_89        | Bacteria_Firmicutes_51_Bacilli_51_Lactobacillales_50_Carnobacteriaceae_37_Isobaculum_32                         |
| OTU_31227 | 7.94E-01                              | 8.17E-01                               | 3.47E-03                                     | 84.92                              | 195.53                            | Bacteroides_thetaiotaomicron_100    | Bacteria_Bacteroidetes_Bacteroidia_Bacteroidales_Bacteroidaceae_Bacteroides_100                                 |
| OTU_79    | 8.29E-01                              | 6.62E-01                               | 1.09E-05                                     | 137.63                             | 19.71                             | Phocaeicola_paurosaccharolyticus_96 | Bacteria_Bacteroidetes_Bacteroidia_Bacteroidales_Bacteroidaceae_Bacteroides_68                                  |
| OTU_94    | 9.95E-01                              | 7.16E-01                               | 7.05E-08                                     | 62.33                              | 164.33                            | Bacteroides_fragilis_99             | Bacteria_Bacteroidetes_74_Bacteroidia_74_Bacteroidales_74_Bacteroidaceae_74_Bacteroides_43                      |
| OTU_9822  | 7.07E-01                              | 9.25E-01                               | 8.31E-04                                     | 95.62                              | 23.51                             | Bifidobacterium_stercoris_98        | Bacteria_Actinobacteria_Actinobacteria_Bifidobacteriales_Bifidobacteriaceae_Bifidobacterium_100                 |



|            |          |          |          |        |        |                                     |                                                                                                                 |
|------------|----------|----------|----------|--------|--------|-------------------------------------|-----------------------------------------------------------------------------------------------------------------|
| OTU_153    | 9.39E-01 | 6.04E-01 | 3.54E-06 | 62.54  | 109.47 | Enterococcus_faecalis_97            | Bacteria_Firmicutes_Bacilli_Lactobacillales_99_Enterococcaceae_87_Enterococcus_65                               |
| OTU_109    | 9.84E-01 | 6.82E-01 | 1.82E-03 | 51.26  | 121.50 | Veillonella_dispar_91               | Bacteria_Firmicutes_Negativicutes_89_Veillonellales_60_Veillonellaceae_60_Veillonella_60                        |
| OTU_117    | 8.57E-01 | 6.04E-01 | 1.45E-04 | 137.14 | 61.44  | Pseudescherichia_vulneris_97        | Bacteria_Proteobacteria_99_Gammaproteobacteria_99_Enterobacterales_99_Enterobacteriaceae_98_Pseudescherichia_75 |
| OTU_134    | 8.57E-01 | 6.50E-01 | 5.98E-06 | 120.44 | 22.16  | Bacteroides_caecimuris_96           | Bacteria_Bacteroidetes_Bacteroidia_Bacteroidales_Bacteroidaceae_Bacteroides_100                                 |
| OTU_44     | 8.19E-01 | 7.55E-01 | 1.54E-02 | 184.22 | 29.34  | Sutterella_massiliensis_100         | Bacteria_Proteobacteria_Betaproteobacteria_Burkholderiales_Sutterellaceae_Sutterella_100                        |
| OTU_53     | 7.57E-01 | 6.83E-01 | 3.87E-01 | 8.95   | 15.48  | Haemophilus_parainfluenzae_100      | Bacteria_Proteobacteria_Gammaproteobacteria_Pasteurellales_Pasteurellaceae_Haemophilus_100                      |
| OTU_355    | 7.07E-01 | 9.52E-01 | 7.26E-03 | 72.03  | 19.16  | Bifidobacterium_stercoris_98        | Bacteria_Actinobacteria_Actinobacteria_Bifidobacteriales_Bifidobacteriaceae_Bifidobacterium_100                 |
| OTU_168    | 8.19E-01 | 9.34E-01 | 2.99E-03 | 60.15  | 115.93 | Veillonella_dispar_87               | Bacteria_Proteobacteria_81_Gammaproteobacteria_81_Enterobacterales_79_Enterobacteriaceae_79_Pseudescherichia_79 |
| OTU_50     | 7.39E-01 | 6.04E-01 | 2.82E-02 | 182.11 | 3.60   | Prevotella_copri_99                 | Bacteria_Bacteroidetes_Bacteroidia_Bacteroidales_Prevotellaceae_Prevotella_100                                  |
| OTU_100973 | 9.71E-01 | 6.05E-01 | 3.89E-01 | 53.23  | 74.21  | Enterococcus_faecalis_98            | Bacteria_Firmicutes_Bacilli_Lactobacillales_Enterococcaceae_Enterococcus_97                                     |
| OTU_244    | 9.27E-01 | 6.04E-01 | 4.09E-02 | 72.50  | 86.99  | Hungatella_hathewayi_91             | Bacteria_Firmicutes_Bacilli_77_Lactobacillales_74_Carnobacteriaceae_56_Isobaculum_49                            |
| OTU_148    | 9.87E-01 | 6.14E-01 | 4.57E-06 | 56.70  | 91.90  | Enterococcus_faecalis_89            | Bacteria_Proteobacteria_92_Gammaproteobacteria_92_Enterobacterales_92_Enterobacteriaceae_91_Pseudescherichia_83 |
| OTU_28     | 9.84E-01 | 9.12E-01 | 5.62E-02 | 19.60  | 6.60   | Megasphaera_elsdenii_99             | Bacteria_Firmicutes_Negativicutes_Veillonellales_Veillonellaceae_Megasphaera_100                                |
| OTU_61     | 9.04E-01 | 6.04E-01 | 1.19E-02 | 108.19 | 27.42  | Sutterella_wadsworthensis_100       | Bacteria_Proteobacteria_Betaproteobacteria_Burkholderiales_Sutterellaceae_Sutterella_100                        |
| OTU_116    | 9.37E-01 | 6.90E-01 | 3.25E-04 | 77.92  | 123.67 | Eisenbergiella_tayi_100             | Bacteria_Firmicutes_Clostridia_Clostridiales_Lachnospiraceae_Eisenbergiella_98                                  |
| OTU_281    | 9.78E-01 | 8.18E-01 | 9.38E-06 | 50.35  | 94.59  | Enterocloster_citroniae_98          | Bacteria_Firmicutes_89_Clostridia_89_Clostridiales_89_Lachnospiraceae_89_Enterocloster_81                       |
| OTU_409    | 9.92E-01 | 7.31E-01 | 8.07E-04 | 65.37  | 80.74  | Pseudescherichia_vulneris_93        | Bacteria_Proteobacteria_Gammaproteobacteria_Enterobacterales_Enterobacteriaceae_99_Pseudescherichia_98          |
| OTU_35755  | 8.16E-01 | 5.62E-01 | 9.27E-03 | 40.20  | 82.05  | Enterococcus_faecalis_98            | Bacteria_Firmicutes_Bacilli_Lactobacillales_Enterococcaceae_99_Enterococcus_94                                  |
| OTU_41     | 7.10E-01 | 6.50E-01 | 8.51E-01 | 92.69  | 105.45 | Senegalimassilia_anaerobia_100      | Bacteria_Firmicutes_Bacilli_Coriobacterii_Coriobacteriales_Coriobacteriaceae_Senegalimassilia_100               |
| OTU_55     | 7.07E-01 | 6.63E-01 | 5.12E-01 | 48.89  | 25.51  | Enterobacter_clocae_100             | Bacteria_Proteobacteria_Gammaproteobacteria_Enterobacterales_Enterobacteriaceae_Enterobacter_97                 |
| OTU_128    | 9.87E-01 | 9.46E-01 | 5.32E-04 | 39.00  | 100.82 | Gibbsiella_dentisursi_90            | Bacteria_Proteobacteria_99_Gammaproteobacteria_99_Enterobacterales_98_Enterobacteriaceae_98_Pseudescherichia_95 |
| OTU_18     | 9.64E-01 | 9.21E-01 | 5.30E-01 | 15.02  | 22.17  | Ligilactobacillus_ruminis_100       | Bacteria_Firmicutes_Bacilli_Lactobacillales_Lactobacillaceae_Ligilactobacillus_100                              |
| OTU_130    | 7.73E-01 | 1.22E-01 | 3.93E-04 | 93.11  | 46.29  | Clostridium_carnis_92               | Bacteria_Firmicutes_Bacilli_99_Lactobacillales_95_Carnobacteriaceae_47_Isobaculum_47                            |
| OTU_2194   | 7.12E-01 | 9.25E-01 | 2.00E-01 | 79.59  | 57.10  | Veillonella_parvula_98              | Bacteria_Firmicutes_Negativicutes_Veillonellales_Veillonellaceae_Veillonella_100                                |
| OTU_375    | 8.49E-01 | 7.07E-01 | 1.43E-01 | 76.56  | 57.95  | Veillonella_parvula_98              | Bacteria_Firmicutes_Negativicutes_Veillonellales_Veillonellaceae_Veillonella_100                                |
| OTU_49     | 7.75E-01 | 6.04E-01 | 2.45E-02 | 107.78 | 13.57  | Lactobacillus_johnsonii_100         | Bacteria_Firmicutes_Bacilli_Lactobacillales_Lactobacillaceae_Lactobacillus_100                                  |
| OTU_74     | 9.92E-01 | 8.14E-01 | 8.47E-02 | 39.17  | 90.99  | Flintibacter_butyriscus_97          | Bacteria_Firmicutes_Clostridia_Clostridiales_Ruminococcaceae_Flintibacter_92                                    |
| OTU_63     | 8.16E-01 | 9.27E-01 | 6.28E-01 | 28.12  | 36.82  | Anaerobutyricum_hallii_99           | Bacteria_Firmicutes_Clostridia_Clostridiales_Lachnospiraceae_Anaerobutyricum_100                                |
| OTU_152    | 9.87E-01 | 6.32E-01 | 3.39E-03 | 35.28  | 83.55  | Enterococcus_dispar_91              | Bacteria_Firmicutes_Bacilli_97_Lactobacillales_78_Carnobacteriaceae_66_Isobaculum_48                            |
| OTU_51     | 9.80E-01 | 6.04E-01 | 5.83E-02 | 129.77 | 26.04  | Turicibacter_sanguinis_96           | Bacteria_Firmicutes_Erysipelotrichia_Erysipelotrichales_Erysipelotrichaceae_Turicibacter_100                    |
| OTU_48     | 7.57E-01 | 7.66E-01 | 2.47E-02 | 19.46  | 92.06  | Clostridium_tepidum_100             | Bacteria_Firmicutes_Clostridia_Clostridiales_Clostridiaceae_1_Clostridium_sensu_stricto_100                     |
| OTU_462    | 7.11E-01 | 9.61E-01 | 1.09E-05 | 103.04 | 13.07  | Bacteroides_uniformis_97            | Bacteria_Bacteroidetes_Bacteroidia_Bacteroidales_Bacteroidaceae_Bacteroides_44                                  |
| OTU_175    | 8.25E-01 | 6.04E-01 | 6.59E-05 | 98.70  | 39.31  | Escherichia_albertii_89             | Bacteria_Firmicutes_56_Clostridia_56_Clostridiales_56_Clostridiaceae_1_56_Desnuesiella_22                       |
| OTU_58     | 8.25E-01 | 6.04E-01 | 1.74E-02 | 126.67 | 37.83  | Faecalicatena_ortica_98             | Bacteria_Firmicutes_Clostridia_Clostridiales_Lachnospiraceae_Mediterraneibacter_54                              |
| OTU_86     | 8.16E-01 | 9.42E-01 | 1.95E-01 | 59.33  | 49.90  | Blautia_obeum_100                   | Bacteria_Firmicutes_Clostridia_Clostridiales_Lachnospiraceae_Blautia_100                                        |
| OTU_266    | 9.67E-01 | 6.27E-01 | 1.08E-01 | 56.12  | 69.92  | Clostridium_symbiosum_96            | Bacteria_Firmicutes_72_Clostridia_72_Clostridiales_72_Lachnospiraceae_71_Clostridium_XIVa_15                    |
| OTU_64     | 7.07E-01 | 8.25E-01 | 5.66E-03 | 32.13  | 79.51  | Eubacterium_callanderi_98           | Bacteria_Firmicutes_Clostridia_Clostridiales_Eubacteriaceae_Eubacterium_40                                      |
| OTU_176    | 8.67E-01 | 9.82E-01 | 1.97E-02 | 41.13  | 86.89  | Pseudescherichia_vulneris_99        | Bacteria_Proteobacteria_97_Gammaproteobacteria_97_Enterobacterales_97_Enterobacteriaceae_97_Pseudescherichia_63 |
| OTU_198    | 9.59E-01 | 8.50E-01 | 5.13E-01 | 72.44  | 64.12  | Escherichia_albertii_89             | Bacteria_Firmicutes_78_Clostridia_78_Clostridiales_78_Lachnospiraceae_78_Roseburia_48                           |
| OTU_302    | 7.07E-01 | 7.25E-01 | 2.75E-05 | 87.63  | 10.35  | Phocaeicola_dorei_97                | Bacteria_Bacteroidetes_Bacteroidia_Bacteroidales_Bacteroidaceae_Bacteroides_78                                  |
| OTU_67     | 7.07E-01 | 9.75E-01 | 6.41E-02 | 36.05  | 87.28  | Bacteroides_nordii_100              | Bacteria_Bacteroidetes_Bacteroidia_Bacteroidales_Bacteroidaceae_Bacteroides_100                                 |
| OTU_47     | 8.06E-01 | 6.04E-01 | 4.56E-01 | 83.85  | 43.59  | Clostridium_saudiense_100           | Bacteria_Firmicutes_Clostridia_Clostridiales_Clostridiaceae_1_Clostridium_sensu_stricto_100                     |
| OTU_20340  | 8.54E-01 | 9.46E-01 | 6.20E-01 | 55.44  | 64.11  | Veillonella_parvula_100             | Bacteria_Firmicutes_Negativicutes_Veillonellales_Veillonellaceae_Veillonella_100                                |
| OTU_140    | 1.00E+00 | 6.83E-01 | 3.61E-04 | 12.07  | 82.96  | Bacteroides_faecichinchillae_96     | Bacteria_Bacteroidetes_Bacteroidia_Bacteroidales_Bacteroidaceae_Bacteroides_93                                  |
| OTU_158    | 8.08E-01 | 4.60E-01 | 2.61E-04 | 81.42  | 34.43  | Clostridium_perfringens_97          | Bacteria_Firmicutes_Clostridia_Clostridiales_Clostridiaceae_1_99_Sarcina_24                                     |
| OTU_95     | 7.07E-01 | 9.25E-01 | 8.81E-01 | 32.37  | 33.48  | Dorea_formicigenerans_99            | Bacteria_Firmicutes_Clostridia_Clostridiales_Lachnospiraceae_Dorea_95                                           |
| OTU_474    | 7.80E-01 | 6.04E-01 | 5.21E-01 | 49.70  | 53.50  | Enterococcus_faecalis_97            | Bacteria_Firmicutes_Bacilli_Lactobacillales_Enterococcaceae_93_Enterococcus_89                                  |
| OTU_39     | 7.46E-01 | 8.28E-01 | 1.41E-01 | 52.37  | 27.34  | Pseudoflavonifractor_phocaeensis_97 | Bacteria_Firmicutes_Clostridia_Clostridiales_Ruminococcaceae_Intestinimonas_55                                  |
| OTU_554    | 7.07E-01 | 6.57E-01 | 1.17E-02 | 68.48  | 29.25  | Veillonella_atypica_97              | Bacteria_Firmicutes_Negativicutes_Veillonellales_Veillonellaceae_Veillonella_100                                |
| OTU_303    | 9.87E-01 | 7.73E-01 | 1.39E-01 | 39.27  | 51.15  | Veillonella_parvula_98              | Bacteria_Firmicutes_Negativicutes_63_Veillonellales_62_Veillonellaceae_62_Veillonella_61                        |
| OTU_164    | 7.07E-01 | 6.04E-01 | 8.39E-07 | 94.87  | 30.41  | Bacteroides_kribbi_97               | Bacteria_Bacteroidetes_Bacteroidia_Bacteroidales_Bacteroidaceae_Bacteroides_100                                 |
| OTU_223    | 9.54E-01 | 7.31E-01 | 1.57E-03 | 16.63  | 60.36  | Phocaeicola_coprophilus_96          | Bacteria_Bacteroidetes_Bacteroidia_Bacteroidales_Bacteroidaceae_Phocaeicola_89                                  |
| OTU_123    | 7.07E-01 | 6.04E-01 | 7.42E-01 | 33.89  | 15.30  | Collinsella_aerofaciens_94          | Bacteria_Actinobacteria_95_Coriobacteriia_95_Coriobacteriales_95_Coriobacteriaceae_95_Collinsella_94            |
| OTU_314    | 8.25E-01 | 9.69E-01 | 4.39E-03 | 38.43  | 52.11  | Enterococcus_hirae_92               | Bacteria_Proteobacteria_58_Gammaproteobacteria_58_Enterobacterales_58_Enterobacteriaceae_57_Pseudescherichia_55 |
| OTU_323    | 8.57E-01 | 2.47E-01 | 1.45E-02 | 35.80  | 52.00  | Enterococcus_faecalis_98            | Bacteria_Firmicutes_Bacilli_Lactobacillales_Enterococcaceae_96_Enterococcus_88                                  |
| OTU_69     | 7.93E-01 | 6.04E-01 | 9.42E-02 | 82.46  | 35.01  | Ruminococcus_gnavus_100             | Bacteria_Firmicutes_Clostridia_Clostridiales_Lachnospiraceae_Lachnospiraceae_incertae_sedis_82                  |
| OTU_150    | 7.46E-01 | 4.38E-02 | 3.75E-04 | 59.07  | 22.46  | Enterococcus_faecalis_92            | Bacteria_Firmicutes_Clostridia_67_Clostridiales_67_Clostridiaceae_1_67_Sarcina_25                               |
| OTU_111226 | 9.01E-01 | 8.28E-01 | 2.42E-02 | 115.63 | 0.69   | Bacteroides_xylanisolvens_98        | Bacteria_Bacteroidetes_Bacteroidia_Bacteroidales_Bacteroidaceae_Bacteroides_100                                 |
| OTU_70     | 8.94E-01 | 9.80E-01 | 1.87E-02 | 86.34  | 30.30  | Eggerthella_lenta_100               | Bacteria_Actinobacteria_Coriobacteriia_Eggerthellales_Eggerthellaceae_Eggerthella_100                           |
| OTU_159    | 9.85E-01 | 6.63E-01 | 2.79E-03 | 83.53  | 18.61  | Kineothrix_allysoides_93            | Bacteria_Firmicutes_Clostridia_Clostridiales_Lachnospiraceae_98_Clostridium_XIVa_38                             |
| OTU_763    | 8.94E-01 | 7.36E-01 | 4.97E-02 | 61.13  | 42.04  | Falcatimonas_natans_97              | Bacteria_Firmicutes_Clostridia_Clostridiales_Lachnospiraceae_Enterocloster_36                                   |
| OTU_124    | 9.04E-01 | 6.05E-01 | 1.29E-02 | 78.52  | 18.17  | Pseudescherichia_vulneris_94        | Bacteria_Proteobacteria_Gammaproteobacteria_83_Enterobacterales_83_Enterobacteriaceae_83_Pseudescherichia_80    |
| OTU_126    | 7.94E-01 | 8.14E-01 | 2.19E-02 | 57.38  | 40.31  | Pseudescherichia_vulneris_99        | Bacteria_Proteobacteria_98_Gammaproteobacteria_98_Enterobacterales_98_Enterobacteriaceae_98_Pseudescherichia_91 |
| OTU_490    | 9.91E-01 | 8.73E-01 | 1.18E-03 | 26.78  | 63.43  | Veillonella_dispar_96               | Bacteria_Firmicutes_99_Negativicutes_98_Veillonellales_98_Veillonellaceae_98_Veillonella_98                     |
| OTU_76     | 7.07E-01 | 9.23E-01 | 1.28E-01 | 22.64  | 52.96  | Desulfovibrio_piger_99              | Bacteria_Proteobacteria_Deltaproteobacteria_Desulfovibrionales_Desulfovibrionaceae_Desulfovibrio_99             |
| OTU_264    | 7.07E-01 | 6.04E-01 | 9.27E-03 | 60.69  | 14.95  | Bifidobacterium_longum_91           | Bacteria_Actinobacteria_83_Actinobacteria_83_Bifidobacteriales_83_Bifidobacteriaceae_83_Pseudoscardovia_42      |
| OTU_3338   | 9.33E-01 | 9.75E-01 | 9.25E-10 | 28.82  | 73.10  | Bacteroides_faecichinchillae_98     | Bacteria_Bacteroidetes_Bacteroidia_Bacteroidales_Bacteroidaceae_Bacteroides_100                                 |

|            |          |          |          |       |       |                                        |                                                                                                                 |
|------------|----------|----------|----------|-------|-------|----------------------------------------|-----------------------------------------------------------------------------------------------------------------|
| OTU_246    | 8.59E-01 | 6.04E-01 | 3.09E-02 | 27.44 | 40.66 | Enterococcus_faecalis_97               | Bacteria_Firmicutes_Bacilli_Lactobacillales_Enterococcaceae_90_Enterococcus_78                                  |
| OTU_318    | 7.43E-01 | 8.70E-01 | 5.32E-04 | 92.69 | 8.15  | Bacteroides_xylanisolvens_98           | Bacteria_Bacteroidetes_Bacteroidia_Bacteroidales_Bacteroidaceae_Bacteroides_100                                 |
| OTU_393    | 8.33E-01 | 6.72E-01 | 2.82E-08 | 56.07 | 12.08 | Parabacteroides_distasonis_98          | Bacteria_Bacteroidetes_Bacteroidia_Bacteroidales_Porphyromonadaceae_Parabacteroides_100                         |
| OTU_341    | 7.07E-01 | 8.88E-01 | 1.60E-02 | 84.51 | 11.05 | Bacteroides_stercoris_97               | Bacteria_Bacteroidetes_Bacteroidia_Bacteroidales_Bacteroidaceae_Bacteroides_100                                 |
| OTU_227    | 8.16E-01 | 4.60E-01 | 8.56E-05 | 57.65 | 22.71 | Clostridium_perfringens_91             | Bacteria_Proteobacteria_80_Gammaproteobacteria_80_Enterobacterales_79_Enterobacteriaceae_78_Pseudescherichia_70 |
| OTU_65     | 9.46E-01 | 9.01E-01 | 6.95E-01 | 26.49 | 22.88 | Gemmiger_formicilis_100                | Bacteria_Firmicutes_Clostridia_Clostridiales_Ruminococcaceae_Gemmiger_95                                        |
| OTU_1025   | 7.07E-01 | 6.04E-01 | 8.39E-07 | 76.98 | 9.00  | Bacteroides_faecichinchillae_96        | Bacteria_Bacteroidetes_Bacteroidia_Bacteroidales_Bacteroidaceae_Bacteroides_99                                  |
| OTU_166    | 7.07E-01 | 9.71E-01 | 2.10E-03 | 59.28 | 12.11 | Pseudescherichia_vulneris_90           | Bacteria_Proteobacteria_Gammaproteobacteria_Enterobacterales_Enterobacteriaceae_Pseudescherichia_46             |
| OTU_78     | 9.67E-01 | 7.56E-01 | 3.03E-01 | 24.59 | 52.13 | Ralstonia_pickettii_100                | Bacteria_Proteobacteria_Betaproteobacteria_Burkholderiales_Burkholderiaceae_Ralstonia_100                       |
| OTU_858    | 9.99E-01 | 8.72E-01 | 1.54E-03 | 24.73 | 12.17 | Bacteroides_caccae_99                  | Bacteria_Bacteroidetes_Bacteroidia_Bacteroidales_Bacteroidaceae_Bacteroides_100                                 |
| OTU_15897  | 7.10E-01 | 7.24E-01 | 7.10E-04 | 63.46 | 10.14 | Streptococcus_mitis_98                 | Bacteria_Firmicutes_Bacilli_Lactobacillales_Streptococcaceae_Streptococcus_100                                  |
| OTU_365    | 9.61E-01 | 6.90E-01 | 6.48E-07 | 22.23 | 46.33 | Enterocloster_citroniae_97             | Bacteria_Firmicutes_Clostridia_Clostridiales_Lachnospiraceae_Enterocloster_100                                  |
| OTU_75     | 9.13E-01 | 8.14E-01 | 6.82E-02 | 29.35 | 13.36 | Allisonella_histaminiformans_100       | Bacteria_Firmicutes_Negativicutes_Veillonellales_Veillonellaceae_Allisonella_100                                |
| OTU_567    | 7.07E-01 | 5.09E-01 | 1.79E-06 | 76.41 | 10.26 | Bacteroides_caecimuris_98              | Bacteria_Bacteroidetes_Bacteroidia_Bacteroidales_Bacteroidaceae_Bacteroides_100                                 |
| OTU_72     | 7.80E-01 | 6.05E-01 | 2.66E-02 | 7.72  | 2.51  | Megamonas_funiformis_98                | Bacteria_Firmicutes_Negativicutes_Selenomonadales_Selenomonadaceae_Megamonas_100                                |
| OTU_600    | 7.91E-01 | 8.88E-01 | 4.56E-02 | 47.37 | 34.17 | Hungatella_effluvii_97                 | Bacteria_Firmicutes_Clostridia_Clostridiales_Lachnospiraceae_Hungatella_53                                      |
| OTU_73     | 8.06E-01 | 6.63E-01 | 3.25E-01 | 4.59  | 7.80  | Phocaeicola_coprocola_100              | Bacteria_Bacteroidetes_Bacteroidia_Bacteroidales_Bacteroidaceae_Phocaeicola_100                                 |
| OTU_921    | 8.20E-01 | 8.68E-01 | 2.77E-01 | 40.43 | 34.34 | Coprococcus_comes_97                   | Bacteria_Firmicutes_Clostridia_Clostridiales_Lachnospiraceae_Coprococcus_37                                     |
| OTU_118    | 9.00E-01 | 6.04E-01 | 1.72E-02 | 53.53 | 13.79 | Pseudescherichia_vulneris_94           | Bacteria_Proteobacteria_Gammaproteobacteria_88_Enterobacterales_88_Enterobacteriaceae_88_Pseudescherichia_85    |
| OTU_96     | 8.53E-01 | 6.04E-01 | 1.28E-01 | 45.97 | 13.69 | Faecalibaculum_rodentium_89            | Bacteria_Firmicutes_Erysipelotrichia_Erysipelotrichales_Erysipelotrichaceae_Faecalibaculum_44                   |
| OTU_216    | 9.31E-01 | 4.60E-01 | 7.99E-02 | 38.48 | 26.61 | Clostridium_tarantellae_97             | Bacteria_Firmicutes_Clostridia_Clostridiales_Clostridiaceae_1_83_Clostridium_sensu_stricto_58                   |
| OTU_212    | 7.07E-01 | 9.62E-01 | 1.60E-02 | 22.26 | 46.73 | Paraclostridium_benzoelyticum_99       | Bacteria_Firmicutes_84_Clostridia_84_Clostridiales_84_Peptostreptococcaceae_84_Paraclostridium_84               |
| OTU_57     | 9.49E-01 | 6.04E-01 | 5.28E-03 | 6.79  | 1.64  | Holdemanela_biformis_98                | Bacteria_Firmicutes_Erysipelotrichia_Erysipelotrichales_Erysipelotrichaceae_Holdemanela_100                     |
| OTU_394    | 9.65E-01 | 6.04E-01 | 9.01E-03 | 22.31 | 39.22 | Enterococcus_faecalis_98               | Bacteria_Firmicutes_Bacilli_Lactobacillales_Enterococcaceae_96_Enterococcus_83                                  |
| OTU_62     | 7.07E-01 | 6.47E-01 | 3.08E-01 | 20.09 | 11.09 | Slackia_isoflavoniconvertens_100       | Bacteria_Actinobacteria_Coriobacteriia_Eggerthellales_Eggerthellaceae_Slackia_100                               |
| OTU_82     | 7.84E-01 | 9.25E-01 | 1.25E-02 | 14.85 | 46.75 | Phocaeicola_coprocola_97               | Bacteria_Bacteroidetes_Bacteroidia_Bacteroidales_Bacteroidaceae_Phocaeicola_100                                 |
| OTU_338    | 9.37E-01 | 8.18E-01 | 6.69E-03 | 28.60 | 37.24 | Pseudescherichia_vulneris_95           | Bacteria_Proteobacteria_Gammaproteobacteria_Enterobacterales_Enterobacteriaceae_Pseudescherichia_62             |
| OTU_3399   | 7.07E-01 | 6.72E-01 | 2.35E-02 | 20.65 | 53.36 | Faecalibacterium_prausnitzii_94        | Bacteria_Firmicutes_Clostridia_Clostridiales_Ruminococcaceae_Faecalibacterium_71                                |
| OTU_404    | 9.92E-01 | 7.16E-01 | 8.89E-01 | 33.89 | 33.07 | Coprococcus_comes_98                   | Bacteria_Firmicutes_92_Clostridia_92_Clostridiales_92_Lachnospiraceae_92_Bariatricus_84                         |
| OTU_188    | 9.92E-01 | 6.14E-01 | 2.39E-04 | 5.74  | 51.34 | Bacteroides_faecis_97                  | Bacteria_Bacteroidetes_Bacteroidia_Bacteroidales_Bacteroidaceae_Bacteroides_97                                  |
| OTU_535    | 7.12E-01 | 5.32E-01 | 2.61E-04 | 43.59 | 17.36 | Enterocloster_citroniae_94             | Bacteria_Firmicutes_Clostridia_Clostridiales_Lachnospiraceae_98_Enterocloster_85                                |
| OTU_184    | 9.86E-01 | 9.46E-01 | 2.61E-04 | 17.39 | 46.77 | Veillonella_dispar_96                  | Bacteria_Firmicutes_Negativicutes_Veillonellales_99_Veillonellaceae_99_Veillonella_96                           |
| OTU_285    | 9.59E-01 | 8.10E-01 | 1.12E-05 | 13.85 | 47.91 | Bacteroides_fragilis_100               | Bacteria_Bacteroidetes_92_Bacteroidia_92_Bacteroidales_92_Bacteroidaceae_92_Bacteroides_89                      |
| OTU_256    | 9.78E-01 | 8.08E-01 | 1.64E-01 | 27.61 | 33.18 | Clostridium_symbiosum_95               | Bacteria_Firmicutes_Clostridia_Clostridiales_Lachnospiraceae_Clostridium_XIVa_48                                |
| OTU_192    | 9.67E-01 | 9.70E-01 | 2.66E-01 | 41.05 | 32.69 | Roseburia_inulinivorans_97             | Bacteria_Firmicutes_Clostridia_Clostridiales_Lachnospiraceae_Roseburia_100                                      |
| OTU_228    | 7.07E-01 | 4.60E-01 | 3.15E-03 | 44.21 | 18.91 | Veillonella_dispar_98                  | Bacteria_Firmicutes_Negativicutes_87_Veillonellales_81_Veillonellaceae_81_Veillonella_81                        |
| OTU_211    | 7.07E-01 | 6.39E-01 | 1.76E-03 | 48.21 | 5.00  | Bacteroides_eggerthii_96               | Bacteria_Bacteroidetes_Bacteroidia_Bacteroidales_Bacteroidaceae_Bacteroides_87                                  |
| OTU_317    | 9.43E-01 | 7.65E-01 | 7.97E-03 | 20.89 | 45.92 | Paraclostridium_benzoelyticum_95       | Bacteria_Firmicutes_Clostridia_Clostridiales_Peptostreptococcaceae_82_Paraclostridium_80                        |
| OTU_122    | 7.50E-01 | 7.73E-01 | 3.27E-01 | 11.17 | 8.48  | Anaerostipes_hadrus_100                | Bacteria_Firmicutes_Clostridia_Clostridiales_Lachnospiraceae_Anaerostipes_100                                   |
| OTU_224    | 9.64E-01 | 9.12E-01 | 1.32E-02 | 12.41 | 48.07 | Phocaeicola_plebeius_96                | Bacteria_Bacteroidetes_Bacteroidia_Bacteroidales_Bacteroidaceae_Phocaeicola_74                                  |
| OTU_54     | 9.78E-01 | 6.04E-01 | 3.33E-07 | 41.68 | 1.21  | Anaerotignum_faecicola_95              | Bacteria_Firmicutes_Clostridia_Clostridiales_Lachnospiraceae_94_Anaerotignum_91                                 |
| OTU_204    | 7.12E-01 | 6.04E-01 | 1.46E-01 | 31.57 | 20.47 | Pseudescherichia_vulneris_99           | Bacteria_Proteobacteria_Gammaproteobacteria_Enterobacterales_Enterobacteriaceae_Pseudescherichia_85             |
| OTU_467    | 7.07E-01 | 4.60E-01 | 1.39E-04 | 41.70 | 19.34 | Clostridium_perfringens_97             | Bacteria_Firmicutes_Clostridia_97_Clostridiales_97_Clostridiaceae_1_97_Clostridium_sensu_stricto_67             |
| OTU_415    | 8.29E-01 | 6.04E-01 | 6.35E-04 | 38.01 | 19.23 | Pseudescherichia_vulneris_92           | Bacteria_Proteobacteria_93_Gammaproteobacteria_93_Enterobacterales_93_Enterobacteriaceae_93_Pseudescherichia_91 |
| OTU_336    | 9.49E-01 | 9.94E-01 | 3.52E-03 | 35.05 | 19.70 | Blautia_coccoides_98                   | Bacteria_Firmicutes_Clostridia_Clostridiales_Lachnospiraceae_Blautia_89                                         |
| OTU_191    | 7.07E-01 | 4.60E-01 | 9.82E-02 | 34.06 | 16.49 | Collinsella_aerofaciens_99             | Bacteria_Actinobacteria_69_Coriobacteriia_69_Coriobacteriales_69_Coriobacteriaceae_68_Collinsella_68            |
| OTU_173    | 9.08E-01 | 8.14E-01 | 5.10E-03 | 49.14 | 2.11  | Phascolarctobacterium_succinatutens_99 | Bacteria_Firmicutes_Negativicutes_Acidaminococcales_Acidaminococcaceae_Phascolarctobacterium_100                |
| OTU_205    | 8.82E-01 | 7.40E-01 | 8.06E-03 | 53.29 | 10.90 | Sutterella_massiliensis_93             | Bacteria_Proteobacteria_Gammaproteobacteria_54_Enterobacterales_54_Enterobacteriaceae_54_Pseudescherichia_51    |
| OTU_1014   | 8.45E-01 | 6.04E-01 | 3.83E-04 | 38.65 | 12.35 | Bacteroides_finegoldii_97              | Bacteria_Bacteroidetes_Bacteroidia_Bacteroidales_Bacteroidaceae_Bacteroides_100                                 |
| OTU_296    | 8.20E-01 | 6.04E-01 | 1.61E-02 | 40.53 | 13.33 | Sutterella_wadsworthensis_92           | Bacteria_Proteobacteria_Gammaproteobacteria_70_Enterobacterales_70_Enterobacteriaceae_70_Pseudescherichia_63    |
| OTU_113566 | 7.07E-01 | 6.66E-01 | 4.02E-01 | 24.31 | 14.01 | Veillonella_parvula_98                 | Bacteria_Firmicutes_Negativicutes_Veillonellales_Veillonellaceae_Veillonella_100                                |
| OTU_232    | 7.94E-01 | 3.49E-01 | 2.24E-01 | 31.49 | 24.22 | Paraclostridium_benzoelyticum_97       | Bacteria_Firmicutes_Clostridia_Clostridiales_Peptostreptococcaceae_Paraclostridium_97                           |
| OTU_1103   | 7.80E-01 | 9.83E-01 | 3.87E-01 | 30.45 | 26.05 | Veillonella_parvula_98                 | Bacteria_Firmicutes_Negativicutes_Veillonellales_Veillonellaceae_Veillonella_100                                |
| OTU_1202   | 9.93E-01 | 7.40E-01 | 2.44E-01 | 21.70 | 26.75 | Veillonella_tobetsuensis_89            | Bacteria_Proteobacteria_41_Gammaproteobacteria_41_Enterobacterales_41_Enterobacteriaceae_41_Pseudescherichia_41 |
| OTU_546    | 9.69E-01 | 9.62E-01 | 3.37E-05 | 16.77 | 30.75 | Pseudescherichia_vulneris_94           | Bacteria_Proteobacteria_98_Gammaproteobacteria_98_Enterobacterales_98_Enterobacteriaceae_96_Pseudescherichia_83 |
| OTU_71     | 9.14E-01 | 6.62E-01 | 1.71E-02 | 74.99 | 2.23  | Streptococcus_anginosus_100            | Bacteria_Firmicutes_Bacilli_Lactobacillales_Streptococcaceae_Streptococcus_100                                  |
| OTU_1504   | 9.93E-01 | 9.90E-01 | 2.61E-03 | 17.15 | 29.51 | Enterocloster_citroniae_98             | Bacteria_Firmicutes_Clostridia_Clostridiales_Lachnospiraceae_Enterocloster_97                                   |
| OTU_356    | 9.38E-01 | 6.04E-01 | 5.79E-03 | 41.78 | 16.27 | Clostridium_symbiosum_93               | Bacteria_Firmicutes_Clostridia_Clostridiales_Lachnospiraceae_88_Clostridium_XIVa_56                             |
| OTU_512    | 8.60E-01 | 9.61E-01 | 9.45E-01 | 30.80 | 30.45 | Roseburia_inulinivorans_92             | Bacteria_Firmicutes_62_Clostridia_62_Clostridiales_62_Lachnospiraceae_62_Roseburia_34                           |
| OTU_100    | 7.07E-01 | 6.10E-01 | 3.34E-02 | 24.49 | 6.58  | Phocaeicola_massiliensis_100           | Bacteria_Bacteroidetes_Bacteroidia_Bacteroidales_Bacteroidaceae_Phocaeicola_87                                  |
| OTU_103    | 7.97E-01 | 8.83E-01 | 4.97E-02 | 13.12 | 8.47  | Fusicatenibacter_saccharivorans_100    | Bacteria_Firmicutes_Clostridia_Clostridiales_Lachnospiraceae_Fusicatenibacter_97                                |
| OTU_19986  | 8.61E-01 | 8.83E-01 | 7.14E-03 | 40.56 | 21.09 | Bacteroides_xylanisolvens_98           | Bacteria_Bacteroidetes_Bacteroidia_Bacteroidales_Bacteroidaceae_Bacteroides_100                                 |
| OTU_43     | 8.61E-01 | 6.76E-01 | 7.37E-01 | 0.82  | 0.66  | Asteroleplasma_anaerobium_79           | Bacteria_Tenericutes_91_Mollicutes_91_Anaeroplasmatales_91_Anaeroplasmataceae_91_Asteroleplasma_91              |
| OTU_215    | 7.70E-01 | 6.04E-01 | 4.10E-02 | 24.07 | 9.13  | Bacteroides_fragilis_96                | Bacteria_Bacteroidetes_Bacteroidia_Bacteroidales_Bacteroidaceae_Bacteroides_100                                 |
| OTU_1220   | 9.78E-01 | 8.14E-01 | 2.43E-03 | 20.97 | 27.92 | Hungatella_effluvii_97                 | Bacteria_Firmicutes_77_Clostridia_77_Clostridiales_77_Lachnospiraceae_77_Hungatella_73                          |
| OTU_196    | 9.66E-01 | 7.51E-01 | 6.69E-02 | 15.77 | 28.23 | Sellimonas_intestinalis_100            | Bacteria_Firmicutes_Clostridia_Clostridiales_Lachnospiraceae_Sellimonas_100                                     |
| OTU_286    | 9.11E-01 | 7.73E-01 | 1.25E-01 | 20.08 | 24.51 | Pseudescherichia_vulneris_97           | Bacteria_Proteobacteria_Gammaproteobacteria_Enterobacterales_Enterobacteriaceae_Escherichia/Shigella_84         |



|           |          |          |          |       |       |                                      |                                                                                                                      |
|-----------|----------|----------|----------|-------|-------|--------------------------------------|----------------------------------------------------------------------------------------------------------------------|
| OTU_45    | 7.10E-01 | 6.53E-01 | 8.52E-01 | 9.83  | 10.58 | Pseudoflavonifractor_phocaeensis_98  | Bacteria_Firmicutes_Clostridia_Clostridiales_Ruminococcaceae_Lawsonibacter_96                                        |
| OTU_68    | 9.61E-01 | 6.63E-01 | 9.27E-03 | 9.04  | 2.17  | Parasutterella_excrementihominis_100 | Bacteria_Proteobacteria_Betaproteobacteria_Burkholderiales_Sutterellaceae_Parasutterella_100                         |
| OTU_2483  | 7.91E-01 | 9.90E-01 | 2.48E-01 | 27.49 | 21.81 | Blautia_hominis_99                   | Bacteria_Firmicutes_Clostridia_Clostridiales_Lachnospiraceae_Blautia_100                                             |
| OTU_190   | 9.92E-01 | 5.62E-01 | 5.62E-03 | 8.34  | 35.83 | Pseudescherichia_vulneris_99         | Bacteria_Proteobacteria_99_Gammaproteobacteria_99_Enterobacterales_99_Enterobacteriaceae_99_Pseudescherichia_93      |
| OTU_274   | 7.84E-01 | 8.73E-01 | 6.60E-03 | 4.97  | 43.32 | Bacteroides_faecichinchillae_96      | Bacteria_Bacteroidetes_Bacteroidia_Bacteroidales_Bacteroidaceae_Bacteroides_89                                       |
| OTU_315   | 7.07E-01 | 6.04E-01 | 1.34E-04 | 43.73 | 9.16  | Roseburia_inulinivorans_94           | Bacteria_Firmicutes_Clostridia_Clostridiales_Lachnospiraceae_90_Roseburia_78                                         |
| OTU_114   | 7.07E-01 | 9.62E-01 | 1.42E-01 | 8.05  | 2.83  | Collinsella_aerofaciens_92           | Bacteria_Actinobacteria_Coriobacteriia_97_Coriobacteriales_97_Coriobacteriaceae_97_Collinsella_96                    |
| OTU_1012  | 9.69E-01 | 6.63E-01 | 4.51E-01 | 25.18 | 19.26 | Veillonella_parvula_91               | Bacteria_Firmicutes_Negativicutes_72_Veillonellales_64_Veillonellaceae_64_Veillonella_64                             |
| OTU_110   | 8.97E-01 | 8.23E-01 | 4.37E-03 | 44.65 | 7.54  | Clostridium_viride_96                | Bacteria_Firmicutes_Clostridia_Clostridiales_Ruminococcaceae_Intestinimonas_57                                       |
| OTU_1334  | 8.05E-01 | 7.75E-01 | 8.71E-02 | 22.60 | 15.39 | Veillonella_atypica_97               | Bacteria_Firmicutes_Negativicutes_Veillonellales_Veillonellaceae_Veillonella_100                                     |
| OTU_21213 | 7.10E-01 | 6.04E-01 | 5.74E-08 | 40.01 | 8.35  | Bacteroides_faecis_97                | Bacteria_Bacteroidetes_Bacteroidia_Bacteroidales_Bacteroidaceae_Bacteroides_100                                      |
| OTU_1362  | 7.57E-01 | 6.04E-01 | 1.68E-03 | 29.35 | 14.52 | Clostridium_perfringens_97           | Bacteria_Firmicutes_Clostridia_99_Clostridiales_99_Clostridiaceae_1_98_Clostridium_sensu_stricto_83                  |
| OTU_1533  | 9.98E-01 | 8.83E-01 | 3.33E-02 | 16.26 | 22.84 | Shigella_dysenteriae_95              | Bacteria_Proteobacteria_Gammaproteobacteria_Enterobacterales_Enterobacteriaceae_Pseudescherichia_60                  |
| OTU_342   | 9.31E-01 | 9.37E-01 | 5.52E-03 | 13.70 | 19.52 | Pseudescherichia_vulneris_98         | Bacteria_Proteobacteria_86_Gammaproteobacteria_86_Enterobacterales_86_Enterobacteriaceae_86_Pseudescherichia_63      |
| OTU_157   | 9.78E-01 | 9.63E-01 | 1.80E-02 | 15.86 | 24.97 | Lachnoclostridium_pacaense_97        | Bacteria_Firmicutes_Clostridia_Clostridiales_Lachnospiraceae_Clostridium_XIVa_44                                     |
| OTU_304   | 9.54E-01 | 6.04E-01 | 2.48E-08 | 38.18 | 3.64  | Parabacteroides_distasonis_94        | Bacteria_Bacteroidetes_Bacteroidia_Bacteroidales_Porphyromonadaceae_93_Parabacteroides_93                            |
| OTU_575   | 7.57E-01 | 7.01E-01 | 8.25E-06 | 9.46  | 21.55 | Enterococcus_faecalis_90             | Bacteria_Firmicutes_Clostridia_92_Clostridiales_92_Lachnospiraceae_92_Enterocloster_87                               |
| OTU_107   | 8.06E-01 | 6.04E-01 | 7.58E-02 | 31.20 | 5.58  | Limosilactobacillus_reuteri_100      | Bacteria_Firmicutes_Bacilli_Lactobacillales_Lactobacillaceae_Limosilactobacillus_100                                 |
| OTU_27286 | 9.92E-01 | 8.35E-01 | 1.83E-03 | 17.89 | 32.88 | Bacteroides_thetaiotaomicron_97      | Bacteria_Bacteroidetes_Bacteroidia_Bacteroidales_Bacteroidaceae_Bacteroides_100                                      |
| OTU_154   | 8.31E-01 | 8.73E-01 | 6.32E-03 | 19.27 | 4.60  | Parabacteroides_merdae_100           | Bacteria_Bacteroidetes_Bacteroidia_Bacteroidales_Porphyromonadaceae_Parabacteroides_100                              |
| OTU_251   | 9.37E-01 | 7.31E-01 | 1.84E-03 | 6.81  | 19.01 | Phocaeicola_coprophilus_97           | Bacteria_Bacteroidetes_Bacteroidia_Bacteroidales_Bacteroidaceae_Phocaeicola_97                                       |
| OTU_275   | 8.82E-01 | 9.97E-01 | 1.49E-02 | 14.50 | 27.59 | Paraclostridium_benzoelyticum_97     | Bacteria_Firmicutes_Clostridia_Clostridiales_Peptostreptococcaceae_Paraclostridium_96                                |
| OTU_384   | 9.06E-01 | 7.42E-01 | 9.08E-01 | 22.14 | 21.55 | Coprococcus_comes_97                 | Bacteria_Firmicutes_Clostridia_Clostridiales_Lachnospiraceae_Bariatricus_76                                          |
| OTU_113   | 9.56E-01 | 9.37E-01 | 1.11E-04 | 43.01 | 4.44  | Oscillibacter_ruminantium_95         | Bacteria_Firmicutes_Clostridia_Clostridiales_Ruminococcaceae_Dysosmobacter_51                                        |
| OTU_1000  | 8.06E-01 | 6.04E-01 | 1.35E-03 | 13.65 | 21.18 | Enterococcus_faecalis_98             | Bacteria_Firmicutes_Bacilli_Lactobacillales_95_Enterococcaceae_67_Enterococcus_66                                    |
| OTU_831   | 9.38E-01 | 7.20E-01 | 8.64E-01 | 16.75 | 17.10 | Hungatella_hathewayi_94              | Bacteria_Firmicutes_Clostridia_93_Clostridiales_93_Lachnospiraceae_93_Hungatella_33                                  |
| OTU_92    | 7.07E-01 | 7.23E-01 | 1.59E-01 | 34.27 | 12.28 | Negativicoccus_succinicivorans_100   | Bacteria_Firmicutes_Negativicutes_Veillonellales_Veillonellaceae_Negativicoccus_100                                  |
| OTU_5293  | 9.87E-01 | 6.05E-01 | 5.39E-02 | 37.08 | 6.77  | Romboutsia_timonensis_99             | Bacteria_Firmicutes_Clostridia_Clostridiales_Peptostreptococcaceae_Romboutsia_100                                    |
| OTU_10419 | 8.57E-01 | 9.46E-01 | 4.45E-01 | 19.19 | 21.50 | Pseudescherichia_vulneris_96         | Bacteria_Proteobacteria_89_Gammaproteobacteria_89_Enterobacterales_87_Enterobacteriaceae_87_Pseudescherichia_64      |
| OTU_104   | 8.85E-01 | 6.83E-01 | 9.88E-01 | 5.53  | 5.56  | Eubacterium_ramulus_98               | Bacteria_Firmicutes_Clostridia_Clostridiales_Lachnospiraceae_Lachnospiraceae_incertae_sedis_92                       |
| OTU_852   | 9.38E-01 | 9.77E-01 | 1.09E-05 | 34.14 | 4.34  | Anaerotignum_aminivorans_96          | Bacteria_Firmicutes_Clostridia_Clostridiales_Lachnospiraceae_99_Anaerotignum_98                                      |
| OTU_668   | 9.78E-01 | 7.73E-01 | 1.65E-04 | 18.73 | 8.87  | Faecalimonas_umbilicata_97           | Bacteria_Firmicutes_Clostridia_Clostridiales_Lachnospiraceae_Clostridium_XIVa_71                                     |
| OTU_155   | 7.07E-01 | 6.04E-01 | 1.20E-01 | 7.19  | 2.56  | Bifidobacterium_callitrichidarum_94  | Bacteria_Actinobacteria_Actinobacteria_99_Bifidobacteriales_99_Bifidobacteriaceae_99_Bifidobacterium_50              |
| OTU_142   | 7.07E-01 | 9.75E-01 | 2.04E-02 | 21.79 | 5.42  | Ruminococcus_faecis_100              | Bacteria_Firmicutes_Clostridia_Clostridiales_Lachnospiraceae_Mediterraneibacter_100                                  |
| OTU_407   | 9.14E-01 | 8.60E-01 | 7.60E-02 | 24.63 | 15.49 | Roseburia_inulinivorans_93           | Bacteria_Firmicutes_Clostridia_92_Clostridiales_92_Lachnospiraceae_92_Roseburia_81                                   |
| OTU_177   | 7.43E-01 | 9.35E-01 | 4.97E-02 | 12.64 | 5.69  | Eubacterium_rectale_100              | Bacteria_Firmicutes_Clostridia_Clostridiales_Lachnospiraceae_Agathobacter_95                                         |
| OTU_21921 | 8.42E-01 | 6.83E-01 | 1.03E-02 | 16.49 | 27.52 | Bacteroides_thetaiotaomicron_98      | Bacteria_Bacteroidetes_Bacteroidia_Bacteroidales_Bacteroidaceae_Bacteroides_100                                      |
| OTU_992   | 9.90E-01 | 6.82E-01 | 7.60E-01 | 7.63  | 8.43  | Paeniclostridium_sordellii_98        | Bacteria_Firmicutes_Clostridia_Clostridiales_Peptostreptococcaceae_Paeniclostridium_100                              |
| OTU_339   | 7.07E-01 | 6.36E-01 | 1.03E-02 | 11.32 | 3.67  | Bifidobacterium_stercoris_99         | Bacteria_Actinobacteria_Actinobacteria_Bifidobacteriales_Bifidobacteriaceae_Bifidobacterium_100                      |
| OTU_678   | 9.64E-01 | 8.36E-01 | 6.57E-02 | 14.95 | 25.01 | Bacteroides_faecis_97                | Bacteria_Bacteroidetes_Bacteroidia_Bacteroidales_Bacteroidaceae_Bacteroides_100                                      |
| OTU_260   | 9.37E-01 | 6.04E-01 | 1.91E-01 | 11.33 | 19.91 | Erysipelatoclostridium_amosum_92     | Bacteria_Firmicutes_Erysipelotrichia_Erysipelotrichales_Erysipelatoclostridiaceae_Erysipelatoclostridium_100         |
| OTU_664   | 7.45E-01 | 2.14E-01 | 9.27E-03 | 23.49 | 12.10 | Bacteroides_thetaiotaomicron_100     | Bacteria_Bacteroidetes_97_Bacteroidia_97_Bacteroidales_97_Bacteroidaceae_96_Bacteroides_73                           |
| OTU_102   | 7.07E-01 | 6.04E-01 | 6.55E-02 | 28.97 | 6.04  | Flintibacter_butyricus_97            | Bacteria_Firmicutes_Clostridia_Clostridiales_Ruminococcaceae_Flintibacter_97                                         |
| OTU_587   | 7.07E-01 | 6.62E-01 | 2.29E-05 | 28.70 | 6.16  | Coprococcus_comes_94                 | Bacteria_Firmicutes_Clostridia_Clostridiales_Lachnospiraceae_99_Coprococcus_53                                       |
| OTU_516   | 1.00E+00 | 9.13E-01 | 2.84E-04 | 7.44  | 21.74 | Enterocloster_citroniae_98           | Bacteria_Firmicutes_Clostridia_95_Clostridiales_95_Lachnospiraceae_95_Enterocloster_78                               |
| OTU_2157  | 7.07E-01 | 6.04E-01 | 3.04E-01 | 19.35 | 2.83  | Veillonella_rogosae_98               | Bacteria_Firmicutes_Negativicutes_Veillonellales_Veillonellaceae_Veillonella_100                                     |
| OTU_199   | 9.60E-01 | 6.04E-01 | 1.77E-01 | 10.83 | 19.27 | Melissococcus_plutonium_92           | Bacteria_Firmicutes_Erysipelotrichia_72_Erysipelotrichales_72_Erysipelatoclostridiaceae_72_Erysipelatoclostridium_72 |
| OTU_138   | 7.07E-01 | 9.46E-01 | 8.07E-04 | 30.58 | 2.18  | Dialister_pneumosintes_100           | Bacteria_Firmicutes_Negativicutes_Veillonellales_Veillonellaceae_Dialister_100                                       |
| OTU_91    | 7.10E-01 | 6.04E-01 | 1.97E-01 | 33.79 | 11.18 | Bifidobacterium_breve_100            | Bacteria_Actinobacteria_Actinobacteria_Bifidobacteriales_Bifidobacteriaceae_Bifidobacterium_100                      |
| OTU_77    | 8.97E-01 | 6.04E-01 | 6.29E-02 | 37.99 | 4.23  | Anaerococcus_vaginalis_100           | Bacteria_Firmicutes_Clostridia_Clostridiales_Peptoniphilaceae_Anaerococcus_100                                       |
| OTU_84    | 9.93E-01 | 6.04E-01 | 3.74E-02 | 34.63 | 3.66  | Ruminococcus_bromii_97               | Bacteria_Firmicutes_Clostridia_Clostridiales_Ruminococcaceae_Ruminococcus_52                                         |
| OTU_543   | 9.65E-01 | 7.96E-01 | 4.49E-04 | 8.84  | 22.86 | Veillonella_dispar_96                | Bacteria_Firmicutes_Negativicutes_Veillonellales_Veillonellaceae_Veillonella_100                                     |
| OTU_932   | 7.07E-01 | 9.90E-01 | 6.08E-04 | 21.82 | 5.85  | Bacteroides_kribbi_96                | Bacteria_Bacteroidetes_Bacteroidia_Bacteroidales_Bacteroidaceae_Bacteroides_97                                       |
| OTU_139   | 7.07E-01 | 6.04E-01 | 8.52E-02 | 12.74 | 23.07 | Oscillibacter_ruminantium_96         | Bacteria_Firmicutes_Clostridia_Clostridiales_Ruminococcaceae_Dysosmobacter_100                                       |
| OTU_1117  | 7.57E-01 | 4.60E-01 | 9.16E-02 | 17.00 | 13.02 | Enterococcus_faecalis_97             | Bacteria_Firmicutes_Bacilli_Lactobacillales_Enterococcaceae_82_Enterococcus_58                                       |
| OTU_1285  | 9.38E-01 | 8.68E-01 | 8.29E-01 | 12.22 | 12.74 | Enterococcus_faecalis_99             | Bacteria_Firmicutes_Bacilli_Lactobacillales_Enterococcaceae_99_Enterococcus_92                                       |
| OTU_2902  | 7.07E-01 | 6.63E-01 | 4.57E-01 | 16.66 | 15.43 | Enterocloster_lavalensis_99          | Bacteria_Firmicutes_Clostridia_Clostridiales_Lachnospiraceae_Enterocloster_100                                       |
| OTU_360   | 7.46E-01 | 7.80E-01 | 3.50E-04 | 25.83 | 2.86  | Enterococcus_pallens_96              | Bacteria_Firmicutes_Bacilli_Lactobacillales_Enterococcaceae_53_Melissococcus_23                                      |
| OTU_402   | 9.87E-01 | 6.04E-01 | 4.85E-04 | 24.34 | 7.80  | Pseudescherichia_vulneris_97         | Bacteria_Proteobacteria_Gammaproteobacteria_Enterobacterales_Enterobacteriaceae_Escherichia/Shigella_83              |
| OTU_3801  | 9.04E-01 | 7.51E-01 | 1.60E-02 | 12.10 | 15.64 | Pseudescherichia_vulneris_95         | Bacteria_Proteobacteria_Gammaproteobacteria_Enterobacterales_Enterobacteriaceae_Pseudescherichia_57                  |
| OTU_5254  | 9.67E-01 | 9.34E-01 | 2.98E-05 | 22.32 | 3.94  | Bacteroides_caccae_98                | Bacteria_Bacteroidetes_Bacteroidia_Bacteroidales_Bacteroidaceae_Bacteroides_100                                      |
| OTU_1026  | 8.24E-01 | 6.04E-01 | 1.16E-03 | 24.65 | 9.28  | Clostridium_perfringens_97           | Bacteria_Firmicutes_Clostridia_Clostridiales_Clostridiaceae_1_75_Clostridium_sensu_stricto_49                        |
| OTU_182   | 7.07E-01 | 8.97E-01 | 6.52E-02 | 6.81  | 18.76 | Pantoea_stewartii_97                 | Bacteria_Proteobacteria_Gammaproteobacteria_Enterobacterales_Enterobacteriaceae_67_Escherichia/Shigella_37           |
| OTU_1113  | 7.85E-01 | 7.25E-01 | 8.23E-01 | 15.80 | 16.16 | Pseudescherichia_vulneris_97         | Bacteria_Proteobacteria_Gammaproteobacteria_Enterobacterales_Enterobacteriaceae_Escherichia/Shigella_97              |
| OTU_413   | 9.05E-01 | 5.62E-01 | 8.45E-02 | 9.97  | 16.35 | Pseudescherichia_vulneris_96         | Bacteria_Proteobacteria_Gammaproteobacteria_Enterobacterales_Enterobacteriaceae_Escherichia/Shigella_81              |
| OTU_1311  | 7.45E-01 | 8.89E-01 | 2.05E-01 | 35.61 | 5.00  | Streptococcus_alactolyticus_100      | Bacteria_Firmicutes_Bacilli_Lactobacillales_Streptococcaceae_Streptococcus_100                                       |
| OTU_527   | 9.78E-01 | 6.04E-01 | 4.47E-01 | 5.53  | 11.02 | Bifidobacterium_bifidum_100          | Bacteria_Actinobacteria_Actinobacteria_Bifidobacteriales_Bifidobacteriaceae_Bifidobacterium_100                      |



|            |          |          |          |       |       |                                     |                                                                                                                         |
|------------|----------|----------|----------|-------|-------|-------------------------------------|-------------------------------------------------------------------------------------------------------------------------|
| OTU_249    | 7.07E-01 | 8.14E-01 | 3.61E-03 | 13.72 | 4.79  | Phocaeicola_vulgatus_99             | Bacteria_Bacteroidetes_89_Bacteroidia_89_Bacteroidales_89_Bacteroidaceae_89_Phocaeicola_78                              |
| OTU_3348   | 8.70E-01 | 6.47E-01 | 5.74E-01 | 14.02 | 14.97 | Escherichia_coli_95                 | Bacteria_Proteobacteria_Gammaproteobacteria_Enterobacterales_Enterobacteriaceae_Pseudescherichia_73                     |
| OTU_8213   | 1.00E+00 | 8.14E-01 | 2.27E-02 | 13.37 | 21.50 | Bacteroides_xylanisolvens_98        | Bacteria_Bacteroidetes_Bacteroidia_Bacteroidales_Bacteroidaceae_Bacteroides_100                                         |
| OTU_121    | 9.45E-01 | 6.06E-01 | 4.53E-02 | 4.23  | 19.87 | Morganella_morganii_99              | Bacteria_Proteobacteria_Gammaproteobacteria_Enterobacterales_Morganellaceae_Morganella_100                              |
| OTU_758    | 9.37E-01 | 8.79E-01 | 7.70E-02 | 10.18 | 12.92 | Flavonifractor_plautii_93           | Bacteria_Firmicutes_Clostridia_Clostridiales_Ruminococcaceae_89_Flavonifractor_87                                       |
| OTU_117242 | 7.07E-01 | 7.01E-01 | 1.64E-01 | 3.04  | 8.99  | Veillonella_parvula_98              | Bacteria_Firmicutes_Negativicutes_Veillonellales_Veillonellaceae_Veillonella_100                                        |
| OTU_631    | 9.71E-01 | 6.99E-01 | 1.69E-01 | 12.98 | 18.03 | Kineothrix_alysoides_96             | Bacteria_Firmicutes_87_Clostridia_87_Clostridiales_87_Lachnospiraceae_87_Merdimonas_36                                  |
| OTU_129    | 9.43E-01 | 6.04E-01 | 2.79E-01 | 12.93 | 8.30  | Clostridium_hylemonae_98            | Bacteria_Firmicutes_Clostridia_Clostridiales_Lachnospiraceae_Clostridium_XIVa_82                                        |
| OTU_108    | 9.52E-01 | 6.04E-01 | 1.27E-01 | 26.48 | 7.36  | Faecalibaculum_rodentium_100        | Bacteria_Firmicutes_Erysipelotrichia_Erysipelotrichales_Erysipelotrichaceae_Faecalibaculum_100                          |
| OTU_28838  | 9.39E-01 | 8.83E-01 | 6.15E-01 | 9.82  | 12.08 | Lacrimispora_amygdalina_97          | Bacteria_Firmicutes_Clostridia_Clostridiales_Lachnospiraceae_Enterocloster_46                                           |
| OTU_956    | 8.97E-01 | 9.90E-01 | 2.92E-05 | 25.57 | 2.56  | Bacteroides_finegoldii_96           | Bacteria_Bacteroidetes_Bacteroidia_Bacteroidales_Bacteroidaceae_Bacteroides_94                                          |
| OTU_88     | 7.07E-01 | 6.61E-01 | 2.50E-01 | 7.45  | 5.48  | Oscillibacter_ruminantium_95        | Bacteria_Firmicutes_Clostridia_Clostridiales_Ruminococcaceae_Oscillibacter_55                                           |
| OTU_391    | 7.45E-01 | 6.04E-01 | 3.82E-03 | 21.42 | 4.82  | Clostridium_perfringens_95          | Bacteria_Firmicutes_Clostridia_Clostridiales_Clostridiaceae_1_93_Sarcina_49                                             |
| OTU_13500  | 9.75E-01 | 7.77E-01 | 3.23E-01 | 13.49 | 14.80 | Pseudescherichia_vulneris_96        | Bacteria_Proteobacteria_Gammaproteobacteria_Enterobacterales_Enterobacteriaceae_Pseudescherichia_54                     |
| OTU_105    | 7.91E-01 | 9.62E-01 | 5.76E-01 | 5.10  | 4.51  | Gemmiger_formicilis_97              | Bacteria_Firmicutes_Clostridia_Clostridiales_Ruminococcaceae_Gemmiger_83                                                |
| OTU_3011   | 7.74E-01 | 6.04E-01 | 5.74E-08 | 21.49 | 4.41  | Phocaeicola_dorei_96                | Bacteria_Bacteroidetes_Bacteroidia_Bacteroidales_Bacteroidaceae_Bacteroides_73                                          |
| OTU_350    | 9.43E-01 | 6.77E-01 | 3.37E-04 | 5.91  | 20.70 | Bacteroides_fragilis_100            | Bacteria_Bacteroidetes_84_Bacteroidia_84_Bacteroidales_84_Bacteroidaceae_81_Mediterranea_55                             |
| OTU_935    | 9.61E-01 | 6.04E-01 | 1.14E-02 | 20.97 | 9.49  | Kineothrix_alysoides_96             | Bacteria_Firmicutes_Clostridia_Clostridiales_Lachnospiraceae_Kineothrix_56                                              |
| OTU_14935  | 7.43E-01 | 9.61E-01 | 5.29E-02 | 23.31 | 5.09  | Veillonella_parvula_98              | Bacteria_Firmicutes_Negativicutes_Veillonellales_Veillonellaceae_Veillonella_100                                        |
| OTU_180    | 7.07E-01 | 7.97E-01 | 6.10E-03 | 8.24  | 2.37  | Bifidobacterium_callitrichidarum_92 | Bacteria_Actinobacteria_90_Actinobacteria_90_Bifidobacteriales_90_Bifidobacteriaceae_90_Pseudoscardovia_21              |
| OTU_297    | 9.38E-01 | 6.04E-01 | 4.67E-05 | 20.92 | 2.67  | Bacteroides_fragilis_96             | Bacteria_Bacteroidetes_Bacteroidia_Bacteroidales_Bacteroidaceae_Bacteroides_100                                         |
| OTU_3533   | 8.33E-01 | 8.71E-01 | 5.85E-01 | 14.07 | 13.29 | Falcatimonas_natans_90              | Bacteria_Firmicutes_54_Clostridia_54_Clostridiales_54_Lachnospiraceae_54_Falcatimonas_22                                |
| OTU_90     | 1.00E+00 | 6.83E-01 | 7.18E-02 | 26.97 | 3.14  | Ligilactobacillus_apodemi_100       | Bacteria_Firmicutes_Bacilli_Lactobacillales_Lactobacillaceae_Ligilactobacillus_100                                      |
| OTU_34575  | 8.83E-01 | 9.46E-01 | 3.04E-02 | 11.71 | 14.75 | Pseudescherichia_vulneris_97        | Bacteria_Proteobacteria_Gammaproteobacteria_Enterobacterales_Enterobacteriaceae_Escherichia/Shigella_96                 |
| OTU_106    | 9.08E-01 | 9.42E-01 | 9.37E-02 | 12.13 | 4.38  | Peptoniphilus_duerdenii_100         | Bacteria_Firmicutes_Clostridia_Clostridiales_Peptoniphilaceae_Peptoniphilus_100                                         |
| OTU_456    | 9.78E-01 | 6.04E-01 | 1.79E-01 | 9.24  | 14.20 | Enterococcus_faecalis_90            | Bacteria_Firmicutes_Clostridia_76_Clostridiales_76_Lachnospiraceae_76_Clostridium_XIVa_18                               |
| OTU_471    | 8.57E-01 | 6.04E-01 | 2.08E-02 | 9.49  | 16.69 | Romboutsia_timonensis_92            | Bacteria_Firmicutes_Bacilli_81_Lactobacillales_46_Carnobacteriaceae_30_Isobaculum_29                                    |
| OTU_147    | 7.07E-01 | 9.98E-01 | 2.45E-02 | 26.97 | 3.33  | Bacteroides_stercoris_99            | Bacteria_Bacteroidetes_74_Bacteroidia_74_Bacteroidales_74_Bacteroidaceae_73_Mediterranea_43                             |
| OTU_4588   | 9.69E-01 | 6.04E-01 | 7.27E-03 | 9.49  | 13.44 | Enterococcus_faecalis_92            | Bacteria_Firmicutes_62_Bacilli_62_Lactobacillales_60_Carnobacteriaceae_51_Catellibacillus_34                            |
| OTU_12075  | 9.04E-01 | 6.05E-01 | 2.57E-01 | 14.87 | 18.38 | Bacteroides_thetaiotaomicron_98     | Bacteria_Bacteroidetes_Bacteroidia_Bacteroidales_Bacteroidaceae_Bacteroides_100                                         |
| OTU_451    | 7.07E-01 | 6.04E-01 | 1.09E-05 | 22.38 | 5.86  | Bacteroides_uniformis_99            | Bacteria_Bacteroidetes_74_Bacteroidia_74_Bacteroidales_74_Bacteroidaceae_73_Mediterranea_42                             |
| OTU_1018   | 8.38E-01 | 9.27E-01 | 2.45E-01 | 12.37 | 15.54 | Paraclostridium_benzoelyticum_92    | Bacteria_Firmicutes_73_Clostridia_73_Clostridiales_73_Peptostreptococcaceae_73_Paraclostridium_51                       |
| OTU_219    | 9.38E-01 | 6.76E-01 | 2.43E-03 | 3.41  | 11.11 | Pseudescherichia_vulneris_99        | Bacteria_Proteobacteria_93_Gammaproteobacteria_93_Enterobacterales_93_Enterobacteriaceae_93_Pseudescherichia_83         |
| OTU_2465   | 7.22E-01 | 9.10E-01 | 1.33E-01 | 14.12 | 10.14 | Clostridium_symbiosum_96            | Bacteria_Firmicutes_Clostridia_Clostridiales_Lachnospiraceae_Clostridium_XIVa_36                                        |
| OTU_3104   | 7.46E-01 | 6.04E-01 | 6.35E-05 | 25.28 | 7.40  | Bacteroides_uniformis_97            | Bacteria_Bacteroidetes_Bacteroidia_Bacteroidales_Bacteroidaceae_Bacteroides_100                                         |
| OTU_571    | 8.61E-01 | 9.69E-01 | 9.61E-01 | 15.44 | 15.29 | Shigella_dysenteriae_93             | Bacteria_Proteobacteria_95_Gammaproteobacteria_95_Enterobacterales_95_Enterobacteriaceae_95_Pseudescherichia_93         |
| OTU_733    | 7.57E-01 | 6.04E-01 | 1.36E-01 | 9.45  | 17.04 | Erysipelatoclostridium_amosum_99    | Bacteria_Firmicutes_93_Erysipelotrichia_93_Erysipelotrichales_93_Erysipelatoclostridiaceae_93_Erysipelatoclostridium_93 |
| OTU_2168   | 9.43E-01 | 9.06E-01 | 4.12E-01 | 16.25 | 13.68 | Roseburia_inulinivorans_97          | Bacteria_Firmicutes_Clostridia_Clostridiales_Lachnospiraceae_Coproccoccus_20                                            |
| OTU_335    | 9.32E-01 | 6.04E-01 | 7.33E-03 | 21.55 | 6.01  | Clostridium_perfringens_98          | Bacteria_Firmicutes_Clostridia_91_Clostridiales_91_Clostridiaceae_1_91_Anaerobacter_28                                  |
| OTU_325    | 7.50E-01 | 6.04E-01 | 3.01E-04 | 20.34 | 2.03  | Streptococcus_gordonii_95           | Bacteria_Firmicutes_Bacilli_Lactobacillales_Streptococcaceae_89_Streptococcus_89                                        |
| OTU_112    | 7.16E-01 | 9.41E-01 | 1.01E-01 | 18.88 | 4.01  | Clostridium_moniliforme_100         | Bacteria_Firmicutes_Clostridia_Clostridiales_Clostridiaceae_1_Clostridium_sensu stricto_100                             |
| OTU_240    | 7.46E-01 | 6.72E-01 | 3.22E-02 | 11.20 | 3.97  | Kineothrix_alysoides_91             | Bacteria_Firmicutes_Clostridia_Clostridiales_Lachnospiraceae_Merdimonas_15                                              |
| OTU_772    | 1.00E+00 | 9.69E-01 | 1.08E-01 | 17.50 | 11.15 | Roseburia_inulinivorans_97          | Bacteria_Firmicutes_Clostridia_Clostridiales_Lachnospiraceae_Ruminococcus2_42                                           |
| OTU_406    | 8.25E-01 | 9.75E-01 | 6.79E-02 | 9.58  | 15.56 | Enterocloster_citroniae_95          | Bacteria_Firmicutes_Clostridia_Clostridiales_Lachnospiraceae_96_Enterocloster_96                                        |
| OTU_915    | 7.57E-01 | 8.65E-01 | 6.66E-04 | 17.62 | 2.96  | Serratia_marcescens_88              | Bacteria_Proteobacteria_94_Gammaproteobacteria_94_Enterobacterales_93_Enterobacteriaceae_93_Pseudescherichia_93         |
| OTU_276    | 7.07E-01 | 9.58E-01 | 6.66E-04 | 9.24  | 1.90  | Phocaeicola_vulgatus_95             | Bacteria_Bacteroidetes_Bacteroidia_Bacteroidales_Bacteroidaceae_Phocaeicola_97                                          |
| OTU_327    | 7.59E-01 | 6.04E-01 | 2.85E-04 | 7.18  | 21.44 | Bacteroides_faecis_95               | Bacteria_Bacteroidetes_Bacteroidia_Bacteroidales_Bacteroidaceae_Bacteroides_96                                          |
| OTU_536    | 8.85E-01 | 8.83E-01 | 8.24E-03 | 7.76  | 11.05 | Flavonifractor_plautii_98           | Bacteria_Firmicutes_93_Clostridia_93_Clostridiales_93_Ruminococcaceae_93_Flavonifractor_92                              |
| OTU_871    | 9.92E-01 | 7.74E-01 | 1.19E-02 | 10.68 | 17.57 | Bacteroides_thetaiotaomicron_97     | Bacteria_Bacteroidetes_68_Bacteroidia_68_Bacteroidales_68_Bacteroidaceae_68_Bacteroides_54                              |
| OTU_146    | 8.29E-01 | 8.65E-01 | 2.64E-03 | 16.12 | 3.82  | Peptoniphilus_koenoenieniae_100     | Bacteria_Firmicutes_Clostridia_Clostridiales_Peptoniphilaceae_Peptoniphilus_100                                         |
| OTU_669    | 7.57E-01 | 6.04E-01 | 9.84E-02 | 7.62  | 4.74  | Blautia_wexlerae_98                 | Bacteria_Firmicutes_Clostridia_Clostridiales_Lachnospiraceae_Blautia_95                                                 |
| OTU_489    | 9.08E-01 | 7.40E-01 | 1.84E-01 | 12.21 | 9.72  | Pseudescherichia_vulneris_97        | Bacteria_Proteobacteria_Gammaproteobacteria_Enterobacterales_Enterobacteriaceae_Escherichia/Shigella_95                 |
| OTU_1251   | 9.87E-01 | 7.77E-01 | 2.26E-02 | 21.11 | 6.92  | Romboutsia_timonensis_98            | Bacteria_Firmicutes_Clostridia_Clostridiales_Peptostreptococcaceae_Romboutsia_97                                        |
| OTU_267    | 9.87E-01 | 6.04E-01 | 2.51E-01 | 9.23  | 16.53 | Clostridium_symbiosum_94            | Bacteria_Firmicutes_Clostridia_Clostridiales_Lachnospiraceae_92_Clostridium_XIVa_74                                     |
| OTU_660    | 7.07E-01 | 6.04E-01 | 9.95E-01 | 9.10  | 9.06  | Kluyvera_intermedia_98              | Bacteria_Proteobacteria_Gammaproteobacteria_Enterobacterales_Enterobacteriaceae_Kluyvera_31                             |
| OTU_4399   | 7.07E-01 | 6.04E-01 | 4.15E-04 | 18.26 | 6.87  | Clostridium_perfringens_97          | Bacteria_Firmicutes_Clostridia_99_Clostridiales_99_Clostridiaceae_1_84_Sarcina_33                                       |
| OTU_221    | 8.25E-01 | 9.62E-01 | 7.01E-02 | 2.86  | 1.28  | Phocaeicola_coprophilus_96          | Bacteria_Bacteroidetes_Bacteroidia_Bacteroidales_Bacteroidaceae_Phocaeicola_100                                         |
| OTU_8880   | 9.38E-01 | 6.04E-01 | 1.49E-02 | 9.30  | 13.02 | Enterococcus_faecalis_97            | Bacteria_Firmicutes_Bacilli_Lactobacillales_Enterococcaceae_89_Enterococcus_76                                          |
| OTU_1389   | 9.38E-01 | 9.69E-01 | 5.93E-01 | 10.93 | 11.73 | Shigella_dysenteriae_97             | Bacteria_Proteobacteria_Gammaproteobacteria_Enterobacterales_Enterobacteriaceae_Escherichia/Shigella_76                 |
| OTU_8403   | 8.57E-01 | 6.63E-01 | 6.79E-02 | 9.58  | 12.65 | Enterococcus_faecalis_98            | Bacteria_Firmicutes_Bacilli_Lactobacillales_Enterococcaceae_94_Enterococcus_91                                          |
| OTU_461    | 9.17E-01 | 8.79E-01 | 3.75E-04 | 4.63  | 21.30 | Bacteroides_thetaiotaomicron_100    | Bacteria_Bacteroidetes_99_Bacteroidia_99_Bacteroidales_99_Bacteroidaceae_96_Mediterranea_50                             |
| OTU_2163   | 9.14E-01 | 9.34E-01 | 3.93E-02 | 17.81 | 9.12  | Roseburia_inulinivorans_97          | Bacteria_Firmicutes_Clostridia_Clostridiales_Lachnospiraceae_Roseburia_90                                               |
| OTU_101    | 7.07E-01 | 7.25E-01 | 1.05E-01 | 0.09  | 21.68 | Rhizobacter_profundi_98             | Bacteria_Proteobacteria_Betaproteobacteria_Burkholderiales_Comamonadaceae_95_Aquicola_54                                |
| OTU_4810   | 8.33E-01 | 7.45E-01 | 5.40E-06 | 13.34 | 2.14  | Phocaeicola_vulgatus_97             | Bacteria_Bacteroidetes_Bacteroidia_Bacteroidales_Bacteroidaceae_Phocaeicola_86                                          |
| OTU_89     | 7.59E-01 | 6.04E-01 | 1.80E-01 | 22.93 | 1.40  | Muribaculum_intestinale_91          | Bacteria_Bacteroidetes_Bacteroidia_Bacteroidales_Muribaculaceae_Duncaniella_49                                          |
| OTU_545    | 7.07E-01 | 6.04E-01 | 2.50E-01 | 8.76  | 12.85 | Erysipelatoclostridium_amosum_98    | Bacteria_Firmicutes_Erysipelotrichia_93_Erysipelotrichales_93_Erysipelatoclostridiaceae_91_Erysipelatoclostridium_91    |
| OTU_473    | 7.57E-01 | 6.07E-01 | 9.40E-03 | 15.82 | 7.24  | Peptoniphilus_tyrelliae_95          | Bacteria_Firmicutes_Clostridia_Clostridiales_Peptoniphilaceae_94_Peptoniphilus_94                                       |

|           |          |          |          |       |       |                                    |                                                                                                                      |
|-----------|----------|----------|----------|-------|-------|------------------------------------|----------------------------------------------------------------------------------------------------------------------|
| OTU_289   | 9.45E-01 | 6.04E-01 | 9.32E-01 | 12.90 | 13.25 | Murimonas_intestini_98             | Bacteria_Firmicutes_Clostridia_Clostridiales_Lachnospiraceae_Murimonas_49                                            |
| OTU_389   | 7.07E-01 | 5.62E-01 | 2.88E-01 | 11.63 | 6.77  | Collinsella_aerofaciens_96         | Bacteria_Actinobacteria_Coriobacteriia_Coriobacteriales_99_Coriobacteriaceae_99_Collinsella_99                       |
| OTU_2183  | 7.11E-01 | 9.27E-01 | 3.55E-04 | 14.26 | 6.57  | Pseudescherichia_vulneris_96       | Bacteria_Proteobacteria_Gammaproteobacteria_Enterobacterales_Enterobacteriaceae_Pseudescherichia_48                  |
| OTU_430   | 8.25E-01 | 6.62E-01 | 6.33E-04 | 9.10  | 2.07  | Parabacteroides_distasonis_94      | Bacteria_Bacteroidetes_Bacteroidia_Bacteroidales_Porphyromonadaceae_64_Parabacteroides_64                            |
| OTU_416   | 9.04E-01 | 6.04E-01 | 2.57E-01 | 11.16 | 8.68  | Pseudescherichia_vulneris_98       | Bacteria_Proteobacteria_98_Gammaproteobacteria_98_Enterobacterales_98_Enterobacteriaceae_97_Pseudescherichia_75      |
| OTU_97    | 7.46E-01 | 6.04E-01 | 3.79E-01 | 17.86 | 5.51  | Kineothrix_allysoides_98           | Bacteria_Firmicutes_Clostridia_Clostridiales_Lachnospiraceae_Kineothrix_63                                           |
| OTU_3549  | 9.31E-01 | 9.59E-01 | 1.75E-02 | 8.22  | 10.95 | Pseudescherichia_vulneris_97       | Bacteria_Proteobacteria_Gammaproteobacteria_Enterobacterales_Enterobacteriaceae_Escherichia/Shigella_75              |
| OTU_517   | 9.61E-01 | 8.22E-01 | 4.84E-01 | 8.76  | 10.72 | Veillonella_tobetsuensis_90        | Bacteria_Firmicutes_Clostridia_94_Clostridiales_94_Lachnospiraceae_93_Faecalimonas_18                                |
| OTU_563   | 7.07E-01 | 6.47E-01 | 4.03E-03 | 16.45 | 3.94  | Peptoniphilus_tyrrelliae_95        | Bacteria_Firmicutes_Clostridia_Clostridiales_Peptoniphilaceae_Peptoniphilus_100                                      |
| OTU_2061  | 9.78E-01 | 6.10E-01 | 9.58E-04 | 14.17 | 5.49  | Enterococcus_faecalis_98           | Bacteria_Firmicutes_Bacilli_Lactobacillales_Enterococcaceae_97_Enterococcus_92                                       |
| OTU_854   | 9.46E-01 | 9.79E-01 | 2.46E-01 | 10.48 | 11.85 | Escherichia_coli_89                | Bacteria_Proteobacteria_78_Gammaproteobacteria_78_Enterobacterales_78_Enterobacteriaceae_78_Pseudescherichia_78      |
| OTU_2185  | 8.73E-01 | 6.62E-01 | 3.26E-03 | 8.96  | 12.93 | Hungatella_effluvii_97             | Bacteria_Firmicutes_Clostridia_Clostridiales_Lachnospiraceae_Hungatella_99                                           |
| OTU_4694  | 8.16E-01 | 9.62E-01 | 1.10E-01 | 14.20 | 10.47 | Enterocloster_clostridioformis_97  | Bacteria_Firmicutes_Clostridia_Clostridiales_Lachnospiraceae_Enterocloster_39                                        |
| OTU_773   | 9.99E-01 | 7.55E-01 | 3.80E-01 | 9.69  | 11.25 | Hungatella_effluvii_97             | Bacteria_Firmicutes_Clostridia_Clostridiales_Lachnospiraceae_Hungatella_98                                           |
| OTU_278   | 9.67E-01 | 6.04E-01 | 9.88E-02 | 4.56  | 18.02 | Erysipelatoclostridium_amosum_91   | Bacteria_Firmicutes_Erysipelotrichia_Erysipelotrichales_Erysipelatoclostridiaceae_Erysipelatoclostridium_100         |
| OTU_434   | 7.46E-01 | 6.04E-01 | 1.83E-03 | 10.84 | 3.42  | Pseudescherichia_vulneris_99       | Bacteria_Proteobacteria_95_Gammaproteobacteria_95_Enterobacterales_95_Enterobacteriaceae_95_Pseudescherichia_87      |
| OTU_588   | 8.06E-01 | 9.46E-01 | 5.32E-03 | 7.31  | 12.38 | Pseudescherichia_vulneris_96       | Bacteria_Proteobacteria_Gammaproteobacteria_Enterobacterales_Enterobacteriaceae_Escherichia/Shigella_64              |
| OTU_1338  | 8.85E-01 | 7.11E-01 | 4.94E-01 | 3.59  | 4.96  | Faecalibacterium_prausnitzii_98    | Bacteria_Firmicutes_Clostridia_Clostridiales_Ruminococcaceae_Faecalibacterium_100                                    |
| OTU_247   | 7.07E-01 | 6.04E-01 | 7.71E-04 | 9.47  | 3.81  | Flavonifractor_plautii_93          | Bacteria_Firmicutes_Clostridia_Clostridiales_Ruminococcaceae_99_Flavonifractor_98                                    |
| OTU_437   | 7.31E-01 | 6.50E-01 | 9.47E-01 | 7.73  | 7.65  | Enterococcus_dispar_98             | Bacteria_Firmicutes_Bacilli_67_Lactobacillales_65_Carnobacteriaceae_35_Isobaculum_35                                 |
| OTU_518   | 8.27E-01 | 9.34E-01 | 9.72E-01 | 12.50 | 12.36 | Veillonella_tobetsuensis_91        | Bacteria_Firmicutes_Clostridia_87_Clostridiales_87_Lachnospiraceae_87_Roseburia_55                                   |
| OTU_52067 | 8.97E-01 | 6.04E-01 | 5.35E-02 | 5.45  | 9.43  | Enterococcus_faecalis_98           | Bacteria_Firmicutes_Bacilli_Lactobacillales_Enterococcaceae_98_Enterococcus_93                                       |
| OTU_93    | 8.48E-01 | 9.45E-01 | 2.77E-01 | 2.86  | 6.23  | Fournierella_massiliensis_96       | Bacteria_Firmicutes_Clostridia_Clostridiales_Ruminococcaceae_Fournierella_74                                         |
| OTU_957   | 7.07E-01 | 6.04E-01 | 5.66E-05 | 18.68 | 5.30  | Roseburia_inulinivorans_96         | Bacteria_Firmicutes_Clostridia_Clostridiales_Lachnospiraceae_Roseburia_91                                            |
| OTU_1900  | 9.92E-01 | 6.81E-01 | 9.41E-01 | 9.34  | 9.47  | Clostridium_symbiosum_96           | Bacteria_Firmicutes_Clostridia_Clostridiales_Lachnospiraceae_Clostridium XIVa_38                                     |
| OTU_780   | 7.07E-01 | 7.73E-01 | 3.93E-06 | 17.87 | 1.18  | Bacteroides_uniformis_95           | Bacteria_Bacteroidetes_Bacteroidia_Bacteroidales_Bacteroidaceae_99_Bacteroides_96                                    |
| OTU_316   | 8.49E-01 | 4.60E-01 | 2.05E-03 | 9.27  | 4.09  | Clostridium_perfringens_93         | Bacteria_Firmicutes_Clostridia_Clostridiales_Clostridiaceae_1_61_Sarcina_30                                          |
| OTU_501   | 7.12E-01 | 6.16E-01 | 4.03E-06 | 14.22 | 2.68  | Phocaeicola_dorei_97               | Bacteria_Bacteroidetes_Bacteroidia_Bacteroidales_Bacteroidaceae_Phocaeicola_94                                       |
| OTU_1351  | 8.54E-01 | 6.04E-01 | 8.66E-10 | 15.76 | 2.12  | Parabacteroides_distasonis_97      | Bacteria_Bacteroidetes_Bacteroidia_Bacteroidales_Porphyromonadaceae_Parabacteroides_100                              |
| OTU_186   | 7.94E-01 | 6.04E-01 | 3.39E-02 | 18.66 | 0.92  | Eisenbergiella_massiliensis_93     | Bacteria_Firmicutes_Clostridia_Clostridiales_Lachnospiraceae_Stomatobaculum_48                                       |
| OTU_769   | 7.07E-01 | 4.60E-01 | 9.01E-02 | 11.72 | 6.67  | Pseudescherichia_vulneris_96       | Bacteria_Proteobacteria_Gammaproteobacteria_Enterobacterales_Enterobacteriaceae_Pseudescherichia_51                  |
| OTU_562   | 7.07E-01 | 6.04E-01 | 1.42E-01 | 9.15  | 5.06  | Collinsella_aerofaciens_97         | Bacteria_Actinobacteria_Coriobacteriia_Coriobacteriales_Coriobacteriaceae_Collinsella_100                            |
| OTU_916   | 7.59E-01 | 7.67E-01 | 6.77E-04 | 12.16 | 2.21  | Anaerobacillus_alkalicacustris_94  | Bacteria_Firmicutes_Bacilli_99_Lactobacillales_94_Carnobacteriaceae_75_Isobaculum_55                                 |
| OTU_3920  | 8.48E-01 | 6.73E-01 | 3.38E-01 | 12.66 | 9.93  | Clostridium_symbiosum_95           | Bacteria_Firmicutes_Clostridia_Clostridiales_Lachnospiraceae_Coproccoccus_46                                         |
| OTU_167   | 8.60E-01 | 6.04E-01 | 6.48E-02 | 16.51 | 3.39  | Ruminiclostridium_cellobioparum_88 | Bacteria_Firmicutes_91_Clostridia_86_Clostridiales_85_Lachnospiraceae_27_Abyssivirga_12                              |
| OTU_1174  | 7.07E-01 | 4.60E-01 | 2.33E-04 | 14.09 | 6.38  | Clostridium_perfringens_97         | Bacteria_Firmicutes_Clostridia_98_Clostridiales_98_Clostridiaceae_1_95_Clostridium sensu stricto_54                  |
| OTU_259   | 8.06E-01 | 6.72E-01 | 3.93E-02 | 3.12  | 14.14 | Escherichia_albertii_98            | Bacteria_Proteobacteria_Gammaproteobacteria_Enterobacterales_Morganellaceae_66_Morganella_60                         |
| OTU_1776  | 8.97E-01 | 9.70E-01 | 2.66E-02 | 6.24  | 10.78 | Hungatella_hathewayi_96            | Bacteria_Firmicutes_Clostridia_Clostridiales_Lachnospiraceae_Hungatella_66                                           |
| OTU_3076  | 8.31E-01 | 6.04E-01 | 7.31E-04 | 13.32 | 3.62  | Parabacteroides_distasonis_98      | Bacteria_Bacteroidetes_Bacteroidia_Bacteroidales_Porphyromonadaceae_Parabacteroides_100                              |
| OTU_48702 | 7.07E-01 | 6.72E-01 | 1.75E-01 | 10.78 | 1.08  | Veillonella_atypica_97             | Bacteria_Firmicutes_Negativicutes_Veillonellales_Veillonellaceae_Veillonella_100                                     |
| OTU_1044  | 9.78E-01 | 7.73E-01 | 2.11E-02 | 16.04 | 7.12  | Eubacterium_oxidoreducens_97       | Bacteria_Firmicutes_Clostridia_Clostridiales_Lachnospiraceae_Roseburia_54                                            |
| OTU_197   | 7.91E-01 | 8.83E-01 | 6.35E-04 | 2.38  | 6.91  | Phocaeicola_coprophilus_99         | Bacteria_Bacteroidetes_86_Bacteroidia_86_Bacteroidales_86_Bacteroidaceae_86_Phocaeicola_78                           |
| OTU_290   | 7.07E-01 | 9.93E-01 | 8.41E-02 | 4.07  | 0.76  | Collinsella_aerofaciens_97         | Bacteria_Actinobacteria_Coriobacteriia_Coriobacteriales_99_Coriobacteriaceae_99_Collinsella_99                       |
| OTU_1035  | 9.08E-01 | 8.79E-01 | 1.84E-03 | 2.88  | 13.59 | Bacteroides_thetaiotaomicron_95    | Bacteria_Bacteroidetes_Bacteroidia_Bacteroidales_Bacteroidaceae_Bacteroides_89                                       |
| OTU_510   | 7.59E-01 | 7.77E-01 | 1.61E-01 | 7.35  | 13.43 | Enterocloster_lavalensis_93        | Bacteria_Firmicutes_Clostridia_Clostridiales_Lachnospiraceae_88_Clostridium XIVa_26                                  |
| OTU_570   | 8.25E-01 | 8.78E-01 | 3.09E-01 | 7.33  | 9.19  | Enterocloster_clostridioformis_90  | Bacteria_Firmicutes_77_Clostridia_77_Clostridiales_77_Lachnospiraceae_77_Murimonas_8                                 |
| OTU_1472  | 7.46E-01 | 6.72E-01 | 3.88E-04 | 14.12 | 5.56  | Hungatella_effluvii_96             | Bacteria_Firmicutes_Clostridia_Clostridiales_Lachnospiraceae_Hungatella_88                                           |
| OTU_633   | 1.00E+00 | 7.73E-01 | 7.71E-04 | 15.79 | 1.00  | Veillonella_atypica_91             | Bacteria_Firmicutes_Negativicutes_87_Veillonellales_66_Veillonellaceae_66_Veillonella_64                             |
| OTU_1235  | 7.07E-01 | 8.42E-01 | 8.73E-01 | 8.80  | 9.31  | Veillonella_parvula_98             | Bacteria_Firmicutes_Negativicutes_Veillonellales_Veillonellaceae_Veillonella_100                                     |
| OTU_200   | 9.46E-01 | 7.31E-01 | 1.11E-02 | 0.67  | 7.22  | Phocaeicola_coprophilus_95         | Bacteria_Bacteroidetes_Bacteroidia_Bacteroidales_Bacteroidaceae_Phocaeicola_100                                      |
| OTU_379   | 7.81E-01 | 6.04E-01 | 8.50E-02 | 6.55  | 12.72 | Pseudescherichia_vulneris_99       | Bacteria_Proteobacteria_51_Gammaproteobacteria_51_Enterobacterales_51_Enterobacteriaceae_50_Pseudescherichia_45      |
| OTU_185   | 8.06E-01 | 9.69E-01 | 9.21E-02 | 2.35  | 1.21  | Phocaeicola_vulgatus_96            | Bacteria_Bacteroidetes_Bacteroidia_Bacteroidales_Bacteroidaceae_Phocaeicola_100                                      |
| OTU_171   | 7.07E-01 | 6.50E-01 | 2.28E-01 | 13.18 | 5.88  | Pseudescherichia_vulneris_99       | Bacteria_Proteobacteria_93_Gammaproteobacteria_93_Enterobacterales_93_Enterobacteriaceae_93_Pseudescherichia_81      |
| OTU_632   | 7.59E-01 | 6.36E-01 | 3.12E-01 | 8.01  | 10.78 | Kineothrix_allysoides_94           | Bacteria_Firmicutes_Clostridia_Clostridiales_Lachnospiraceae_Kineothrix_31                                           |
| OTU_359   | 9.08E-01 | 9.76E-01 | 4.24E-03 | 16.29 | 3.73  | Collinsella_aerofaciens_93         | Bacteria_Actinobacteria_94_Coriobacteriia_94_Coriobacteriales_94_Coriobacteriaceae_94_Collinsella_93                 |
| OTU_388   | 9.02E-01 | 7.58E-01 | 9.96E-02 | 3.48  | 2.32  | Faecalibacterium_prausnitzii_93    | Bacteria_Firmicutes_Clostridia_Clostridiales_Ruminococcaceae_97_Faecalibacterium_90                                  |
| OTU_1647  | 7.85E-01 | 9.46E-01 | 3.79E-02 | 9.55  | 12.57 | Bacteroides_thetaiotaomicron_98    | Bacteria_Bacteroidetes_Bacteroidia_Bacteroidales_Bacteroidaceae_Bacteroides_100                                      |
| OTU_329   | 9.92E-01 | 6.04E-01 | 2.28E-01 | 6.60  | 13.57 | Veillonella_parvula_91             | Bacteria_Firmicutes_Erysipelotrichia_57_Erysipelotrichales_57_Erysipelatoclostridiaceae_57_Erysipelatoclostridium_57 |
| OTU_734   | 8.16E-01 | 7.73E-01 | 5.77E-01 | 7.75  | 8.75  | Escherichia_coli_92                | Bacteria_Proteobacteria_Gammaproteobacteria_Enterobacterales_Enterobacteriaceae_Pseudescherichia_93                  |
| OTU_2150  | 9.93E-01 | 9.54E-01 | 2.69E-02 | 10.33 | 7.52  | Coproccoccus_comes_97              | Bacteria_Firmicutes_Clostridia_Clostridiales_Lachnospiraceae_Coproccoccus_65                                         |
| OTU_201   | 7.07E-01 | 6.04E-01 | 5.06E-01 | 6.01  | 10.70 | Pseudescherichia_vulneris_91       | Bacteria_Proteobacteria_Gammaproteobacteria_Enterobacterales_Enterobacteriaceae_Pseudescherichia_51                  |
| OTU_475   | 9.93E-01 | 6.93E-01 | 3.15E-01 | 12.56 | 9.37  | Enterococcus_faecalis_91           | Bacteria_Firmicutes_Clostridia_65_Clostridiales_65_Lachnospiraceae_65_Roseburia_35                                   |
| OTU_998   | 9.38E-01 | 6.04E-01 | 3.13E-04 | 16.68 | 3.61  | Bacteroides_stercoris_97           | Bacteria_Bacteroidetes_Bacteroidia_Bacteroidales_Bacteroidaceae_Bacteroides_100                                      |
| OTU_828   | 9.66E-01 | 9.36E-01 | 8.59E-04 | 4.25  | 14.20 | Phascolarctobacterium_faecium_97   | Bacteria_Firmicutes_Negativicutes_Acidaminococcales_Acidaminococcaceae_Phascolarctobacterium_100                     |
| OTU_2391  | 7.07E-01 | 6.50E-01 | 6.15E-01 | 8.45  | 9.39  | Enterococcus_hirae_97              | Bacteria_Firmicutes_Bacilli_Lactobacillales_99_Enterococcaceae_91_Vagococcus_29                                      |
| OTU_593   | 7.45E-01 | 9.69E-01 | 7.10E-04 | 17.92 | 3.16  | Clostridium_perfringens_100        | Bacteria_Firmicutes_66_Clostridia_66_Clostridiales_66_Clostridiaceae_1_66_Anaerobacter_20                            |
| OTU_9590  | 9.10E-01 | 9.43E-01 | 1.47E-02 | 10.91 | 7.51  | Hungatella_effluvii_97             | Bacteria_Firmicutes_Clostridia_Clostridiales_Lachnospiraceae_Hungatella_88                                           |



|           |          |          |          |       |       |                                      |                                                                                                                 |
|-----------|----------|----------|----------|-------|-------|--------------------------------------|-----------------------------------------------------------------------------------------------------------------|
| OTU_4591  | 7.73E-01 | 9.37E-01 | 1.49E-01 | 11.68 | 9.01  | Roseburia_inulinivorans_97           | Bacteria_Firmicutes_Clostridia_Clostridiales_Lachnospiraceae_Roseburia_70                                       |
| OTU_1723  | 8.89E-01 | 9.94E-01 | 1.42E-01 | 7.93  | 9.49  | Pseudescherichia_vulneris_100        | Bacteria_Proteobacteria_99_Gammaproteobacteria_99_Enterobacterales_98_Enterobacteriaceae_97_Pseudescherichia_51 |
| OTU_2235  | 7.33E-01 | 6.05E-01 | 8.26E-03 | 5.07  | 8.44  | Enterococcus_faecalis_98             | Bacteria_Firmicutes_Bacilli_Lactobacillales_Enterococcaceae_96_Enterococcus_85                                  |
| OTU_83    | 7.07E-01 | 9.12E-01 | 5.78E-01 | 0.60  | 0.42  | Methanobrevibacter_smithii_100       | Archaea_Euryarchaeota_Methanobacteria_Methanobacteriales_Methanobacteriaceae_Methanobrevibacter_100             |
| OTU_4534  | 8.75E-01 | 9.61E-01 | 1.52E-01 | 8.17  | 10.75 | Veillonella_dispar_99                | Bacteria_Firmicutes_Negativicutes_87_Veillonellales_85_Veillonellaceae_85_Veillonella_84                        |
| OTU_4416  | 7.07E-01 | 9.42E-01 | 3.33E-07 | 14.66 | 3.78  | Clostridium_tarantellae_93           | Bacteria_Firmicutes_Clostridia_Clostridiales_Lachnospiraceae_52_Ruminococcus2_17                                |
| OTU_292   | 8.18E-01 | 8.42E-01 | 6.36E-02 | 5.82  | 2.96  | Kineothrix_alysoides_97              | Bacteria_Firmicutes_Clostridia_Clostridiales_Lachnospiraceae_Kineothrix_50                                      |
| OTU_721   | 8.97E-01 | 6.04E-01 | 1.04E-01 | 9.90  | 7.04  | Peptoniphilus_grossensis_98          | Bacteria_Firmicutes_74_Clostridia_74_Clostridiales_74_Peptoniphilaceae_74_Peptoniphilus_74                      |
| OTU_183   | 7.07E-01 | 6.04E-01 | 7.10E-01 | 6.91  | 8.65  | Escherichia_coli_91                  | Bacteria_Proteobacteria_Gammaproteobacteria_85_Enterobacterales_85_Enterobacteriaceae_85_Pseudescherichia_84    |
| OTU_4233  | 7.59E-01 | 9.05E-01 | 8.49E-03 | 10.21 | 6.02  | Enterocloster_citroniae_97           | Bacteria_Firmicutes_Clostridia_Clostridiales_Lachnospiraceae_Enterocloster_81                                   |
| OTU_385   | 7.07E-01 | 9.38E-01 | 4.03E-03 | 1.86  | 12.47 | Enterococcus_canis_93                | Bacteria_Firmicutes_Bacilli_66_Lactobacillales_53_Carnobacteriaceae_41_Isobaculum_27                            |
| OTU_28886 | 9.87E-01 | 9.61E-01 | 1.32E-02 | 6.98  | 2.12  | Paeniclostridium_sordellii_99        | Bacteria_Firmicutes_Clostridia_Clostridiales_Peptostreptococcaceae_Paeniclostridium_100                         |
| OTU_1114  | 7.07E-01 | 7.80E-01 | 9.70E-02 | 8.68  | 10.71 | Pseudescherichia_vulneris_99         | Bacteria_Proteobacteria_96_Gammaproteobacteria_96_Enterobacterales_96_Enterobacteriaceae_96_Pseudescherichia_77 |
| OTU_1134  | 7.11E-01 | 9.12E-01 | 5.27E-01 | 8.10  | 8.81  | Clostridium_symbiosum_91             | Bacteria_Firmicutes_87_Clostridia_87_Clostridiales_87_Lachnospiraceae_87_Stomatobaculum_21                      |
| OTU_1956  | 9.67E-01 | 6.04E-01 | 2.63E-01 | 7.98  | 9.25  | Pseudescherichia_vulneris_97         | Bacteria_Proteobacteria_Gammaproteobacteria_Enterobacterales_Enterobacteriaceae_Escherichia/Shigella_81         |
| OTU_382   | 7.57E-01 | 6.04E-01 | 6.15E-01 | 8.12  | 9.27  | Acetanaerobacterium_elongatum_90     | Bacteria_Firmicutes_Clostridia_Clostridiales_Ruminococcaceae_Hydrogenoanaerobacterium_36                        |
| OTU_2158  | 7.14E-01 | 6.04E-01 | 3.57E-01 | 9.13  | 4.57  | Veillonella_rogosae_98               | Bacteria_Firmicutes_Negativicutes_Veillonellales_Veillonellaceae_Veillonella_100                                |
| OTU_179   | 8.01E-01 | 9.12E-01 | 2.40E-01 | 11.21 | 5.76  | Pseudescherichia_vulneris_93         | Bacteria_Proteobacteria_Gammaproteobacteria_Enterobacterales_95_Enterobacteriaceae_92_Escherichia/Shigella_45   |
| OTU_220   | 7.07E-01 | 6.04E-01 | 1.82E-01 | 11.78 | 3.63  | Fusobacterium_mortiferum_95          | Bacteria_Fusobacteria_80_Fusobacteriales_80_Fusobacteriaceae_72_Cetobacterium_43                                |
| OTU_229   | 7.88E-01 | 6.83E-01 | 6.35E-02 | 0.07  | 14.83 | Methyloversatilis_universalis_100    | Bacteria_Proteobacteria_Betaproteobacteria_Nitrosomonadales_Sterolibacteriaceae_Methyloversatilis_100           |
| OTU_601   | 9.93E-01 | 6.72E-01 | 2.68E-01 | 10.14 | 8.44  | Bacteroides_acidifaciens_89          | Bacteria_Proteobacteria_76_Gammaproteobacteria_76_Enterobacterales_76_Enterobacteriaceae_76_Pseudescherichia_68 |
| OTU_940   | 9.37E-01 | 6.47E-01 | 5.24E-04 | 10.85 | 4.67  | Pseudescherichia_vulneris_96         | Bacteria_Proteobacteria_Gammaproteobacteria_Enterobacterales_Enterobacteriaceae_Escherichia/Shigella_83         |
| OTU_144   | 9.38E-01 | 9.70E-01 | 2.12E-01 | 3.52  | 2.14  | Ruminococcus_bromii_98               | Bacteria_Firmicutes_Clostridia_Clostridiales_Ruminococcaceae_Ruminococcus_67                                    |
| OTU_194   | 9.78E-01 | 7.80E-01 | 8.94E-01 | 4.15  | 4.57  | Parabacteroides_johnsonii_96         | Bacteria_Bacteroidetes_Bacteroidia_Bacteroidales_Porphyromonadaceae_Parabacteroides_100                         |
| OTU_32704 | 7.33E-01 | 6.63E-01 | 2.43E-03 | 9.57  | 1.91  | Bifidobacterium_stercoris_98         | Bacteria_Actinobacteria_Actinobacteria_Bifidobacteriales_Bifidobacteriaceae_Bifidobacterium_100                 |
| OTU_615   | 8.16E-01 | 8.65E-01 | 3.98E-02 | 5.95  | 9.24  | Escherichia_albertii_88              | Bacteria_Proteobacteria_63_Gammaproteobacteria_63_Enterobacterales_63_Enterobacteriaceae_63_Pseudescherichia_63 |
| OTU_3970  | 9.78E-01 | 7.80E-01 | 3.65E-01 | 9.01  | 7.92  | Kineothrix_alysoides_97              | Bacteria_Firmicutes_Clostridia_Clostridiales_Lachnospiraceae_Clostridium_XIVa_42                                |
| OTU_4479  | 9.75E-01 | 6.39E-01 | 6.33E-04 | 5.47  | 12.47 | Pseudescherichia_vulneris_97         | Bacteria_Proteobacteria_91_Gammaproteobacteria_91_Enterobacterales_91_Enterobacteriaceae_90_Pseudescherichia_88 |
| OTU_300   | 8.19E-01 | 6.36E-01 | 6.02E-03 | 5.23  | 10.36 | Murimonas_intestini_96               | Bacteria_Firmicutes_Clostridia_Clostridiales_Lachnospiraceae_Eisenbergiella_14                                  |
| OTU_812   | 7.10E-01 | 8.50E-01 | 2.99E-03 | 10.12 | 2.01  | Bifidobacterium_stercoris_97         | Bacteria_Actinobacteria_Actinobacteria_Bifidobacteriales_Bifidobacteriaceae_Bifidobacterium_99                  |
| OTU_777   | 7.88E-01 | 9.67E-01 | 1.71E-02 | 12.51 | 4.04  | Ruminococcus_gnavus_97               | Bacteria_Firmicutes_Clostridia_Clostridiales_Lachnospiraceae_Dorea_38                                           |
| OTU_310   | 1.00E+00 | 6.04E-01 | 5.52E-03 | 4.44  | 10.58 | Enterococcus_faecalis_91             | Bacteria_Firmicutes_Clostridia_94_Clostridiales_94_Peptostreptococcaceae_94_Paraclostridium_93                  |
| OTU_163   | 7.07E-01 | 7.40E-01 | 3.63E-01 | 5.11  | 1.33  | Collinsella_aerofaciens_96           | Bacteria_Actinobacteria_Coriobacteriia_Coriobacteriales_96_Coriobacteriaceae_96_Collinsella_96                  |
| OTU_698   | 1.00E+00 | 6.73E-01 | 6.83E-03 | 7.87  | 2.01  | Phocaeicola_dorei_96                 | Bacteria_Bacteroidetes_Bacteroidia_Bacteroidales_Bacteroidaceae_Bacteroides_89                                  |
| OTU_898   | 7.07E-01 | 7.44E-01 | 1.16E-02 | 4.95  | 12.80 | Faecalibacterium_prausnitzii_93      | Bacteria_Firmicutes_Clostridia_Clostridiales_Ruminococcaceae_Faecalibacterium_59                                |
| OTU_2313  | 9.32E-01 | 9.25E-01 | 4.92E-02 | 6.72  | 9.04  | Enterocloster_citroniae_97           | Bacteria_Firmicutes_Clostridia_Clostridiales_Lachnospiraceae_Sellimonas_51                                      |
| OTU_390   | 1.00E+00 | 7.94E-01 | 2.46E-03 | 13.28 | 3.27  | Clostridium_tarantellae_93           | Bacteria_Firmicutes_97_Clostridia_97_Clostridiales_97_Clostridiaceae_1_92_Anaerobacter_18                       |
| OTU_598   | 9.60E-01 | 6.04E-01 | 6.35E-01 | 8.00  | 9.03  | Paraclostridium_benzoelyticum_97     | Bacteria_Firmicutes_Clostridia_Clostridiales_Peptostreptococcaceae_Paraclostridium_93                           |
| OTU_556   | 9.14E-01 | 8.83E-01 | 5.36E-03 | 2.27  | 12.59 | Bacteroides_fragilis_94              | Bacteria_Bacteroidetes_Bacteroidia_Bacteroidales_Bacteroidaceae_Bacteroides_97                                  |
| OTU_174   | 7.07E-01 | 8.42E-01 | 1.46E-01 | 3.78  | 1.20  | Caecibacter_massiliensis_98          | Bacteria_Firmicutes_Negativicutes_Veillonellales_Veillonellaceae_Megasphaera_100                                |
| OTU_2104  | 7.46E-01 | 9.77E-01 | 6.31E-01 | 7.34  | 7.89  | Hungatella_effluvii_97               | Bacteria_Firmicutes_Clostridia_Clostridiales_Lachnospiraceae_Hungatella_100                                     |
| OTU_135   | 7.82E-01 | 6.04E-01 | 4.92E-02 | 10.33 | 1.55  | Vallitalea_pronyensis_86             | Bacteria_Firmicutes_97_Clostridia_92_Clostridiales_92_Lachnospiraceae_30_Lactonifactor_11                       |
| OTU_3874  | 7.57E-01 | 8.36E-01 | 8.09E-01 | 7.70  | 7.47  | Hespellia_porcina_90                 | Bacteria_Proteobacteria_70_Gammaproteobacteria_70_Enterobacterales_70_Enterobacteriaceae_70_Pseudescherichia_67 |
| OTU_1370  | 7.46E-01 | 4.38E-02 | 9.81E-05 | 10.96 | 4.32  | Clostridium_perfringens_95           | Bacteria_Firmicutes_Clostridia_55_Clostridiales_55_Clostridiaceae_1_50_Anaerobacter_19                          |
| OTU_10302 | 7.91E-01 | 9.53E-01 | 7.03E-03 | 13.70 | 1.63  | Bacteroides_xylanisolvens_97         | Bacteria_Bacteroidetes_Bacteroidia_Bacteroidales_Bacteroidaceae_Bacteroides_100                                 |
| OTU_3371  | 7.82E-01 | 6.04E-01 | 3.15E-03 | 5.19  | 9.50  | Enterococcus_faecalis_97             | Bacteria_Firmicutes_Bacilli_Lactobacillales_Enterococcaceae_94_Enterococcus_85                                  |
| OTU_628   | 9.59E-01 | 9.54E-01 | 2.69E-03 | 4.22  | 7.49  | Flintibacter_butyricus_89            | Bacteria_Firmicutes_80_Clostridia_80_Clostridiales_80_Ruminococcaceae_80_Flavonifractor_80                      |
| OTU_1528  | 9.14E-01 | 9.34E-01 | 1.77E-02 | 5.18  | 9.64  | Veillonella_dispar_87                | Bacteria_Proteobacteria_70_Gammaproteobacteria_70_Enterobacterales_69_Enterobacteriaceae_69_Pseudescherichia_69 |
| OTU_1001  | 9.98E-01 | 6.04E-01 | 1.59E-01 | 5.48  | 8.25  | Enterococcus_faecalis_97             | Bacteria_Firmicutes_Bacilli_99_Lactobacillales_98_Enterococcaceae_92_Enterococcus_79                            |
| OTU_125   | 7.07E-01 | 8.14E-01 | 2.43E-02 | 7.56  | 0.79  | Solobacterium_moorei_99              | Bacteria_Firmicutes_Erysipelotrichia_Erysipelotrichales_Erysipelotrichaceae_Solobacterium_100                   |
| OTU_243   | 7.57E-01 | 6.04E-01 | 9.79E-02 | 11.82 | 4.61  | Escherichia_albertii_91              | Bacteria_Proteobacteria_Gammaproteobacteria_Aeromonadales_94_Succinivibrionaceae_94_Succinivibrio_94            |
| OTU_9774  | 9.31E-01 | 6.04E-01 | 5.41E-04 | 9.84  | 4.24  | Escherichia_albertii_92              | Bacteria_Proteobacteria_76_Gammaproteobacteria_76_Enterobacterales_76_Enterobacteriaceae_76_Pseudescherichia_76 |
| OTU_151   | 9.31E-01 | 7.30E-01 | 2.59E-02 | 13.26 | 2.43  | Finegoldia_magna_100                 | Bacteria_Firmicutes_Clostridia_Clostridiales_Peptoniphilaceae_Finegoldia_100                                    |
| OTU_38387 | 7.10E-01 | 9.89E-01 | 2.97E-02 | 15.07 | 2.14  | Bacteroides_faecis_97                | Bacteria_Bacteroidetes_Bacteroidia_Bacteroidales_Bacteroidaceae_Bacteroides_100                                 |
| OTU_484   | 7.57E-01 | 8.97E-01 | 4.91E-03 | 15.07 | 1.89  | Bifidobacterium_longum_92            | Bacteria_Actinobacteria_99_Actinobacteria_99_Bifidobacteriales_99_Bifidobacteriaceae_99_Pseudoscaldovia_47      |
| OTU_4176  | 7.74E-01 | 6.04E-01 | 7.94E-03 | 5.24  | 10.04 | Escherichia_coli_90                  | Bacteria_Proteobacteria_Gammaproteobacteria_Enterobacterales_Enterobacteriaceae_Pseudescherichia_79             |
| OTU_1691  | 9.87E-01 | 7.02E-01 | 1.87E-02 | 4.98  | 7.20  | Enterocloster_citroniae_96           | Bacteria_Firmicutes_Clostridia_Clostridiales_Lachnospiraceae_Enterocloster_98                                   |
| OTU_262   | 9.98E-01 | 6.04E-01 | 3.95E-02 | 16.05 | 2.87  | Bifidobacterium_pseudolongum_100     | Bacteria_Actinobacteria_Actinobacteria_Bifidobacteriales_Bifidobacteriaceae_Bifidobacterium_100                 |
| OTU_12789 | 9.14E-01 | 6.05E-01 | 6.29E-01 | 7.06  | 7.54  | Shigella_dysenteriae_95              | Bacteria_Proteobacteria_Gammaproteobacteria_Enterobacterales_Enterobacteriaceae_Pseudescherichia_73             |
| OTU_2236  | 9.65E-01 | 9.12E-01 | 2.30E-02 | 5.02  | 7.85  | Enterococcus_sulfureus_88            | Bacteria_Firmicutes_98_Negativicutes_63_Selenomonadales_58_Sporomusaceae_54_Anaerosinus_54                      |
| OTU_2009  | 7.07E-01 | 8.73E-01 | 8.13E-05 | 13.53 | 1.19  | Bacteroides_finegoldii_96            | Bacteria_Bacteroidetes_Bacteroidia_Bacteroidales_Bacteroidaceae_Bacteroides_89                                  |
| OTU_487   | 8.06E-01 | 9.74E-01 | 7.22E-01 | 1.18  | 0.96  | Phocaeicola_coprocola_96             | Bacteria_Bacteroidetes_Bacteroidia_Bacteroidales_Bacteroidaceae_Phocaeicola_100                                 |
| OTU_280   | 7.07E-01 | 6.99E-01 | 4.03E-03 | 10.69 | 3.64  | Intestinimonas_butyriciproducens_100 | Bacteria_Firmicutes_Clostridia_Clostridiales_Ruminococcaceae_Intestinimonas_100                                 |
| OTU_3228  | 9.78E-01 | 9.70E-01 | 4.61E-02 | 9.89  | 7.81  | Bacteroides_thetaiotaomicron_98      | Bacteria_Bacteroidetes_Bacteroidia_Bacteroidales_Bacteroidaceae_Bacteroides_100                                 |
| OTU_729   | 7.85E-01 | 7.96E-01 | 1.52E-03 | 6.04  | 2.18  | Phocaeicola_vulgatus_100             | Bacteria_Bacteroidetes_94_Bacteroidia_94_Bacteroidales_94_Bacteroidaceae_94_Phocaeicola_86                      |
| OTU_12878 | 9.69E-01 | 9.46E-01 | 2.29E-04 | 4.31  | 10.29 | Gibbsiella_dentisursi_87             | Bacteria_Proteobacteria_90_Gammaproteobacteria_90_Enterobacterales_90_Enterobacteriaceae_90_Pseudescherichia_89 |
| OTU_620   | 7.07E-01 | 6.04E-01 | 2.20E-02 | 10.05 | 5.20  | Erysipelatoclostridium_amosum_98     | Bacteria_Firmicutes_Erysipelotrichia_Erysipelotrichales_Erysipelatoclostridiaceae_97_Erysipelatoclostridium_97  |

|           |          |          |          |       |       |                                   |                                                                                                                 |
|-----------|----------|----------|----------|-------|-------|-----------------------------------|-----------------------------------------------------------------------------------------------------------------|
| OTU_1376  | 7.07E-01 | 9.94E-01 | 6.97E-04 | 11.86 | 1.88  | Clostridium_tarantellae_97        | Bacteria_Firmicutes_Clostridia_82_Clostridiales_82_Clostridiaceae_1_81_Anaerobacter_29                          |
| OTU_111   | 7.88E-01 | 7.07E-01 | 1.79E-01 | 0.03  | 9.23  | Nevskia_lacus_100                 | Bacteria_Proteobacteria_Gammaproteobacteria_Nevskiales_Nevskiaceae_Nevskia_100                                  |
| OTU_326   | 8.06E-01 | 7.02E-01 | 1.33E-02 | 0.37  | 5.25  | Bacteroides_mediterraneensis_96   | Bacteria_Bacteroidetes_Bacteroidia_Bacteroidales_Bacteroidaceae_Phocaeicola_100                                 |
| OTU_443   | 9.08E-01 | 6.04E-01 | 7.86E-02 | 4.76  | 10.39 | Erysipelatoclostridium_amosum_96  | Bacteria_Firmicutes_Erysipelotrichia_Erysipelotrichales_Erysipelatoclostridiaceae_Erysipelatoclostridium_100    |
| OTU_337   | 9.06E-01 | 7.65E-01 | 1.89E-03 | 1.53  | 11.28 | Phascolarctobacterium_faecium_93  | Bacteria_Firmicutes_Negativicutes_Acidaminococcales_Acidaminococcaceae_Phascolarctobacterium_100                |
| OTU_98    | 8.31E-01 | 7.67E-01 | 7.65E-01 | 3.14  | 3.69  | Dialister_invisus_100             | Bacteria_Firmicutes_Negativicutes_Veillonellales_Veillonellaceae_Dialister_100                                  |
| OTU_1092  | 7.46E-01 | 6.04E-01 | 2.55E-02 | 19.09 | 0.12  | Prevotella_copri_96               | Bacteria_Bacteroidetes_Bacteroidia_Bacteroidales_Prevotellaceae_Prevotella_99                                   |
| OTU_10803 | 9.45E-01 | 9.53E-01 | 7.71E-04 | 4.60  | 7.29  | Pseudescherichia_vulneris_95      | Bacteria_Proteobacteria_Gammaproteobacteria_Enterobacterales_Enterobacteriaceae_Pseudescherichia_62             |
| OTU_9992  | 7.07E-01 | 8.79E-01 | 1.40E-02 | 5.38  | 7.76  | Pseudescherichia_vulneris_90      | Bacteria_Proteobacteria_54_Gammaproteobacteria_54_Enterobacterales_54_Enterobacteriaceae_50_Pseudescherichia_50 |
| OTU_4069  | 9.43E-01 | 9.41E-01 | 5.40E-01 | 6.67  | 5.58  | Bacteroides_fragilis_97           | Bacteria_Bacteroidetes_Bacteroidia_Bacteroidales_Bacteroidaceae_Bacteroides_100                                 |
| OTU_1348  | 8.33E-01 | 8.72E-01 | 1.43E-01 | 5.42  | 6.83  | Enterococcus_faecalis_92          | Bacteria_Firmicutes_Clostridia_95_Clostridiales_95_Lachnospiraceae_95_Hungatella_94                             |
| OTU_3006  | 7.07E-01 | 9.41E-01 | 2.61E-04 | 10.78 | 3.45  | Coprococcus_comes_97              | Bacteria_Firmicutes_Clostridia_Clostridiales_Lachnospiraceae_Coprococcus_75                                     |
| OTU_651   | 7.07E-01 | 9.74E-01 | 2.68E-01 | 3.47  | 5.02  | Enterocloster_clostridioformis_94 | Bacteria_Firmicutes_Clostridia_Clostridiales_Lachnospiraceae_Butyrvibrio_30                                     |
| OTU_939   | 9.61E-01 | 6.04E-01 | 5.42E-03 | 12.93 | 2.50  | Pseudescherichia_vulneris_96      | Bacteria_Proteobacteria_Gammaproteobacteria_98_Enterobacterales_98_Enterobacteriaceae_97_Pseudescherichia_69    |
| OTU_378   | 9.59E-01 | 7.31E-01 | 1.20E-01 | 1.74  | 10.89 | Burkholderia_pseudomultivorans_93 | Bacteria_Proteobacteria_Gammaproteobacteria_89_Enterobacterales_85_Enterobacteriaceae_85_Pseudescherichia_73    |
| OTU_6325  | 7.33E-01 | 9.61E-01 | 9.20E-02 | 5.56  | 8.34  | Veillonella_dispar_96             | Bacteria_Firmicutes_Negativicutes_95_Veillonellales_89_Veillonellaceae_89_Veillonella_89                        |
| OTU_860   | 9.61E-01 | 6.04E-01 | 1.69E-01 | 4.82  | 6.54  | Enterocloster_clostridioformis_93 | Bacteria_Firmicutes_Clostridia_Clostridiales_Lachnospiraceae_Butyrvibrio_25                                     |
| OTU_3943  | 7.57E-01 | 9.61E-01 | 2.53E-01 | 6.14  | 7.53  | Pseudescherichia_vulneris_97      | Bacteria_Proteobacteria_Gammaproteobacteria_Enterobacterales_Enterobacteriaceae_Escherichia/Shigella_64         |
| OTU_539   | 7.10E-01 | 9.54E-01 | 2.47E-01 | 5.57  | 8.65  | Kineothrix_alysoides_95           | Bacteria_Firmicutes_Clostridia_Clostridiales_Lachnospiraceae_Kineothrix_40                                      |
| OTU_708   | 7.07E-01 | 6.04E-01 | 1.12E-04 | 11.72 | 1.70  | Streptococcus_mitis_97            | Bacteria_Firmicutes_Bacilli_Lactobacillales_Streptococcaceae_99_Streptococcus_98                                |
| OTU_569   | 7.93E-01 | 8.73E-01 | 9.10E-04 | 9.62  | 1.84  | Pseudescherichia_vulneris_100     | Bacteria_Proteobacteria_91_Gammaproteobacteria_91_Enterobacterales_90_Enterobacteriaceae_90_Pseudescherichia_87 |
| OTU_83047 | 7.59E-01 | 9.94E-01 | 5.10E-04 | 2.88  | 11.09 | Veillonella_tobetsuensis_87       | Bacteria_Proteobacteria_67_Gammaproteobacteria_67_Enterobacterales_67_Enterobacteriaceae_66_Pseudescherichia_66 |
| OTU_30097 | 9.78E-01 | 6.04E-01 | 3.69E-03 | 10.15 | 4.47  | Bacteroides_faecis_97             | Bacteria_Bacteroidetes_Bacteroidia_Bacteroidales_Bacteroidaceae_Bacteroides_100                                 |
| OTU_1701  | 9.92E-01 | 6.04E-01 | 2.98E-01 | 7.35  | 6.06  | Hungatella_effluvi_96             | Bacteria_Firmicutes_Clostridia_Clostridiales_Lachnospiraceae_Hungatella_60                                      |
| OTU_1324  | 7.07E-01 | 6.14E-01 | 5.88E-01 | 6.21  | 5.37  | Blautia_faecis_100                | Bacteria_Firmicutes_Clostridia_Clostridiales_Lachnospiraceae_Blautia_100                                        |
| OTU_617   | 8.30E-01 | 9.46E-01 | 7.65E-05 | 12.99 | 1.06  | Anaerotignum_aminivorans_93       | Bacteria_Firmicutes_Clostridia_Clostridiales_Lachnospiraceae_84_Eisenbergiella_9                                |
| OTU_785   | 8.16E-01 | 7.73E-01 | 6.84E-03 | 3.39  | 9.09  | Vibrio_quintilis_88               | Bacteria_Proteobacteria_Gammaproteobacteria_Enterobacterales_Enterobacteriaceae_99_Pseudescherichia_84          |
| OTU_458   | 7.07E-01 | 6.04E-01 | 7.06E-01 | 2.34  | 2.02  | Collinsella_aerofaciens_97        | Bacteria_Actinobacteria_Coriobacteriia_Coriobacteriales_Coriobacteriaceae_Collinsella_100                       |
| OTU_566   | 8.06E-01 | 7.44E-01 | 1.27E-01 | 5.53  | 9.41  | Kineothrix_alysoides_96           | Bacteria_Firmicutes_Clostridia_Clostridiales_Lachnospiraceae_Kineothrix_50                                      |
| OTU_6534  | 7.11E-01 | 8.54E-01 | 1.87E-05 | 11.74 | 1.87  | Bacteroides_uniformis_96          | Bacteria_Bacteroidetes_Bacteroidia_Bacteroidales_Bacteroidaceae_Bacteroides_80                                  |
| OTU_36016 | 8.39E-01 | 6.04E-01 | 1.29E-02 | 3.35  | 6.24  | Enterococcus_faecalis_99          | Bacteria_Firmicutes_Bacilli_Lactobacillales_99_Enterococcaceae_97_Enterococcus_93                               |
| OTU_766   | 9.72E-01 | 7.38E-01 | 9.22E-02 | 5.06  | 7.13  | Clostridium_symbiosum_95          | Bacteria_Firmicutes_Clostridia_Clostridiales_Lachnospiraceae_Clostridium_XIVa_40                                |
| OTU_1222  | 7.75E-01 | 7.59E-01 | 7.70E-02 | 5.20  | 7.32  | Escherichia_albertii_91           | Bacteria_Proteobacteria_94_Gammaproteobacteria_94_Enterobacterales_94_Enterobacteriaceae_94_Pseudescherichia_93 |
| OTU_1428  | 9.87E-01 | 6.04E-01 | 2.99E-03 | 10.39 | 2.02  | Bacteroides_clarus_98             | Bacteria_Bacteroidetes_Bacteroidia_Bacteroidales_Bacteroidaceae_Bacteroides_100                                 |
| OTU_739   | 9.06E-01 | 8.78E-01 | 7.88E-01 | 3.22  | 3.54  | Paeniclostridium_sordellii_99     | Bacteria_Firmicutes_Clostridia_Clostridiales_Peptostreptococcaceae_Paeniclostridium_100                         |
| OTU_3837  | 8.19E-01 | 7.02E-01 | 7.42E-02 | 7.27  | 4.16  | Blautia_coccoides_98              | Bacteria_Firmicutes_Clostridia_Clostridiales_Lachnospiraceae_Blautia_100                                        |
| OTU_762   | 9.31E-01 | 8.33E-01 | 4.35E-02 | 4.08  | 9.65  | Bacteroides_fragilis_98           | Bacteria_Bacteroidetes_69_Bacteroidia_69_Bacteroidales_69_Bacteroidaceae_67_Mediterranea_57                     |
| OTU_145   | 7.77E-01 | 8.28E-01 | 9.43E-01 | 1.06  | 1.02  | Bacteroides_gallinaecum_100       | Bacteria_Bacteroidetes_Bacteroidia_Bacteroidales_Bacteroidaceae_98_Bacteroides_80                               |
| OTU_3766  | 7.68E-01 | 8.71E-01 | 9.35E-01 | 6.95  | 6.78  | Coprococcus_comes_97              | Bacteria_Firmicutes_Clostridia_Clostridiales_Lachnospiraceae_Coprococcus_71                                     |
| OTU_4633  | 9.75E-01 | 8.79E-01 | 5.05E-02 | 9.64  | 5.41  | Roseburia_inulinivorans_97        | Bacteria_Firmicutes_Clostridia_Clostridiales_Lachnospiraceae_Roseburia_61                                       |
| OTU_1452  | 9.05E-01 | 9.57E-01 | 1.96E-03 | 3.15  | 6.02  | Enterocloster_citroniae_93        | Bacteria_Firmicutes_Clostridia_Clostridiales_Lachnospiraceae_73_Enterocloster_66                                |
| OTU_2759  | 9.23E-01 | 8.65E-01 | 7.58E-01 | 6.93  | 6.56  | Enterococcus_hirae_97             | Bacteria_Firmicutes_Bacilli_Lactobacillales_98_Enterococcaceae_83_Enterococcus_62                               |
| OTU_165   | 9.73E-01 | 6.04E-01 | 6.57E-02 | 14.01 | 1.77  | Kineothrix_alysoides_98           | Bacteria_Firmicutes_Clostridia_Clostridiales_Lachnospiraceae_Kineothrix_68                                      |
| OTU_3119  | 9.87E-01 | 6.27E-01 | 5.00E-01 | 6.16  | 7.11  | Paraclostridium_benzoelyticum_96  | Bacteria_Firmicutes_Clostridia_Clostridiales_Peptostreptococcaceae_Paraclostridium_91                           |
| OTU_1938  | 1.00E+00 | 6.93E-01 | 6.63E-01 | 6.20  | 6.65  | Pseudescherichia_vulneris_96      | Bacteria_Proteobacteria_Gammaproteobacteria_Enterobacterales_Enterobacteriaceae_Escherichia/Shigella_88         |
| OTU_7396  | 7.07E-01 | 6.04E-01 | 2.82E-08 | 13.68 | 1.62  | Bacteroides_uniformis_96          | Bacteria_Bacteroidetes_Bacteroidia_Bacteroidales_Bacteroidaceae_Bacteroides_100                                 |
| OTU_372   | 9.14E-01 | 7.31E-01 | 6.68E-01 | 0.96  | 1.15  | Phocaeicola_vulgatus_96           | Bacteria_Bacteroidetes_Bacteroidia_Bacteroidales_Bacteroidaceae_Phocaeicola_100                                 |
| OTU_656   | 9.78E-01 | 9.60E-01 | 1.01E-02 | 1.91  | 11.09 | Clostridium_symbiosum_96          | Bacteria_Firmicutes_76_Clostridia_76_Clostridiales_76_Lachnospiraceae_76_Faecalimonas_17                        |
| OTU_3362  | 8.53E-01 | 6.04E-01 | 4.42E-02 | 4.61  | 6.49  | Enterococcus_faecalis_95          | Bacteria_Firmicutes_Bacilli_95_Lactobacillales_94_Enterococcaceae_73_Melissooccus_40                            |
| OTU_11360 | 7.57E-01 | 6.04E-01 | 7.10E-04 | 9.52  | 3.57  | Clostridium_perfringens_97        | Bacteria_Firmicutes_Clostridia_Clostridiales_Clostridiaceae_1_90_Clostridium_sensu_stricto_56                   |
| OTU_4150  | 7.10E-01 | 9.41E-01 | 2.56E-05 | 10.62 | 1.12  | Bacteroides_clarus_98             | Bacteria_Bacteroidetes_Bacteroidia_Bacteroidales_Bacteroidaceae_Bacteroides_96                                  |
| OTU_2126  | 9.08E-01 | 7.75E-01 | 3.09E-01 | 7.97  | 6.72  | Roseburia_inulinivorans_88        | Bacteria_Proteobacteria_73_Gammaproteobacteria_73_Enterobacterales_73_Enterobacteriaceae_72_Pseudescherichia_67 |
| OTU_8777  | 9.14E-01 | 8.68E-01 | 4.67E-02 | 5.35  | 8.37  | Pseudescherichia_vulneris_96      | Bacteria_Proteobacteria_Gammaproteobacteria_Enterobacterales_Enterobacteriaceae_Escherichia/Shigella_78         |
| OTU_1094  | 8.33E-01 | 8.69E-01 | 1.08E-03 | 10.95 | 3.43  | Clostridium_symbiosum_95          | Bacteria_Firmicutes_Clostridia_Clostridiales_Lachnospiraceae_99_Clostridium_XIVa_67                             |
| OTU_3684  | 7.07E-01 | 9.85E-01 | 2.42E-02 | 7.39  | 4.75  | Blautia_hominis_97                | Bacteria_Firmicutes_Clostridia_Clostridiales_Lachnospiraceae_Enterocloster_48                                   |
| OTU_945   | 9.67E-01 | 6.63E-01 | 3.36E-03 | 2.88  | 8.44  | Veillonella_denticariosi_91       | Bacteria_Firmicutes_Bacilli_54_Lactobacillales_29_Carnobacteriaceae_29_Isobaculum_23                            |
| OTU_27019 | 9.87E-01 | 6.04E-01 | 7.34E-01 | 5.68  | 5.96  | Pseudescherichia_vulneris_96      | Bacteria_Proteobacteria_Gammaproteobacteria_Enterobacterales_Enterobacteriaceae_Escherichia/Shigella_74         |
| OTU_913   | 8.82E-01 | 6.04E-01 | 2.85E-04 | 9.12  | 3.59  | Escherichia_albertii_92           | Bacteria_Proteobacteria_94_Gammaproteobacteria_94_Enterobacterales_93_Enterobacteriaceae_93_Pseudescherichia_88 |
| OTU_9851  | 7.12E-01 | 8.50E-01 | 1.64E-04 | 8.46  | 3.68  | Pseudescherichia_vulneris_95      | Bacteria_Proteobacteria_95_Gammaproteobacteria_95_Enterobacterales_94_Enterobacteriaceae_94_Pseudescherichia_86 |
| OTU_1058  | 9.04E-01 | 9.70E-01 | 4.11E-01 | 6.78  | 8.05  | Escherichia_albertii_92           | Bacteria_Proteobacteria_90_Gammaproteobacteria_90_Enterobacterales_90_Enterobacteriaceae_90_Pseudescherichia_89 |
| OTU_181   | 7.46E-01 | 8.51E-01 | 9.28E-01 | 2.02  | 2.11  | Coprococcus_catus_100             | Bacteria_Firmicutes_Clostridia_Clostridiales_Lachnospiraceae_Coprococcus_98                                     |
| OTU_193   | 8.54E-01 | 6.04E-01 | 3.30E-01 | 3.13  | 6.32  | Lancefieldella_parvulum_100       | Bacteria_Actinobacteria_Coriobacteriia_Coriobacteriales_Atopobiaceae_Lancefieldella_100                         |
| OTU_847   | 7.86E-01 | 7.73E-01 | 2.54E-01 | 5.55  | 7.29  | Veillonella_dispar_98             | Bacteria_Firmicutes_Negativicutes_75_Veillonellales_56_Veillonellaceae_56_Veillonella_54                        |
| OTU_222   | 7.07E-01 | 6.07E-01 | 2.94E-01 | 3.94  | 1.04  | Slackia_isoflavoniconvertens_96   | Bacteria_Actinobacteria_Coriobacteriia_Eggerthellales_99_Eggerthellaceae_99_Slackia_99                          |
| OTU_1121  | 1.00E+00 | 8.78E-01 | 2.64E-02 | 5.02  | 7.78  | Enterococcus_dispar_99            | Bacteria_Firmicutes_83_Bacilli_83_Lactobacillales_80_Carnobacteriaceae_63_Isobaculum_48                         |
| OTU_28022 | 8.44E-01 | 7.55E-01 | 1.02E-03 | 12.54 | 2.06  | Bacteroides_xylanisolvens_98      | Bacteria_Bacteroidetes_Bacteroidia_Bacteroidales_Bacteroidaceae_Bacteroides_100                                 |
| OTU_178   | 9.78E-01 | 6.06E-01 | 2.09E-03 | 2.54  | 0.33  | Odoribacter_splanchnicus_99       | Bacteria_Bacteroidetes_Bacteroidia_Bacteroidales_Odoribacteraceae_Odoribacter_100                               |



|           |          |          |          |       |       |                                     |                                                                                                                      |
|-----------|----------|----------|----------|-------|-------|-------------------------------------|----------------------------------------------------------------------------------------------------------------------|
| OTU_1468  | 8.54E-01 | 6.72E-01 | 2.69E-04 | 1.21  | 11.15 | Bacteroides_thetaiotaomicron_95     | Bacteria_Bacteroidetes_Bacteroidia_Bacteroidales_Bacteroidaceae_Bacteroides_87                                       |
| OTU_4647  | 7.07E-01 | 6.14E-01 | 8.45E-02 | 12.78 | 0.47  | Streptococcus_peroris_98            | Bacteria_Firmicutes_Bacilli_Lactobacillales_Streptococcaceae_Streptococcus_100                                       |
| OTU_3912  | 9.86E-01 | 9.90E-01 | 7.24E-03 | 2.42  | 8.67  | Bacteroides_fragilis_97             | Bacteria_Bacteroidetes_Bacteroidia_Bacteroidales_Bacteroidaceae_Bacteroides_100                                      |
| OTU_10126 | 7.57E-01 | 8.14E-01 | 6.77E-04 | 8.41  | 3.74  | Hungatella_effluvi_97               | Bacteria_Firmicutes_Clostridia_Clostridiales_Lachnospiraceae_Hungatella_74                                           |
| OTU_759   | 9.82E-01 | 8.22E-01 | 3.57E-03 | 2.63  | 8.60  | Phascolarctobacterium_faecium_96    | Bacteria_Firmicutes_84_Negativicutes_84_Acidaminococcales_84_Acidaminococcaceae_84_Phascolarctobacterium_84          |
| OTU_846   | 7.07E-01 | 9.66E-01 | 9.64E-01 | 5.66  | 5.60  | Shigella_dysenteriae_97             | Bacteria_Proteobacteria_Gammaproteobacteria_Enterobacterales_Enterobacteriaceae_Escherichia/Shigella_68              |
| OTU_663   | 8.06E-01 | 6.53E-01 | 3.00E-02 | 9.47  | 2.60  | Sutterella_massiliensis_99          | Bacteria_Proteobacteria_91_Betaproteobacteria_91_Burkholderiales_91_Sutterellaceae_89_Sutterella_89                  |
| OTU_870   | 9.64E-01 | 8.73E-01 | 1.46E-02 | 3.63  | 6.35  | Veillonella_parvula_98              | Bacteria_Firmicutes_Negativicutes_73_Veillonellales_71_Veillonellaceae_71_Veillonella_70                             |
| OTU_8409  | 8.06E-01 | 8.16E-01 | 8.43E-01 | 5.78  | 5.61  | Enterocloster_citroniae_97          | Bacteria_Firmicutes_Clostridia_Clostridiales_Lachnospiraceae_Enterocloster_86                                        |
| OTU_715   | 7.85E-01 | 6.04E-01 | 5.06E-01 | 5.02  | 4.01  | Enterocloster_citroniae_93          | Bacteria_Firmicutes_99_Clostridia_99_Clostridiales_99_Lachnospiraceae_99_Enterocloster_92                            |
| OTU_857   | 8.97E-01 | 9.06E-01 | 5.27E-01 | 5.89  | 6.50  | Escherichia_coli_92                 | Bacteria_Proteobacteria_99_Gammaproteobacteria_99_Enterobacterales_98_Enterobacteriaceae_98_Pseudescherichia_97      |
| OTU_514   | 7.74E-01 | 9.41E-01 | 7.65E-01 | 3.87  | 3.58  | Veillonella_parvula_100             | Bacteria_Firmicutes_95_Negativicutes_90_Veillonellales_81_Veillonellaceae_81_Veillonella_80                          |
| OTU_271   | 7.11E-01 | 8.83E-01 | 2.09E-01 | 5.00  | 3.69  | Hespellia_porcina_98                | Bacteria_Firmicutes_Clostridia_Clostridiales_Lachnospiraceae_Faecalicatena_41                                        |
| OTU_1217  | 9.06E-01 | 9.37E-01 | 1.21E-04 | 2.45  | 7.46  | Filobacillus_milosensis_88          | Bacteria_Firmicutes_98_Bacilli_96_Lactobacillales_74_Carnobacteriaceae_74_Isobaculum_65                              |
| OTU_1136  | 7.46E-01 | 6.04E-01 | 4.49E-04 | 9.86  | 2.72  | Clostridium_perfringens_96          | Bacteria_Firmicutes_99_Clostridia_99_Clostridiales_99_Clostridiaceae_1_98_Sarcina_42                                 |
| OTU_946   | 7.45E-01 | 6.04E-01 | 1.15E-01 | 4.75  | 6.99  | Romboutsia_timonensis_95            | Bacteria_Firmicutes_Clostridia_97_Clostridiales_97_Peptostreptococcaceae_97_Romboutsia_29                            |
| OTU_1010  | 8.29E-01 | 9.90E-01 | 5.11E-06 | 11.50 | 1.85  | Clostridium_gasigenes_88            | Bacteria_Bacteroidetes_78_Bacteroidia_78_Bacteroidales_78_Bacteroidaceae_78_Mediterranea_65                          |
| OTU_1321  | 7.07E-01 | 7.16E-01 | 2.58E-01 | 6.74  | 5.22  | Dorea_longicatena_97                | Bacteria_Firmicutes_92_Clostridia_92_Clostridiales_92_Lachnospiraceae_92_Dorea_86                                    |
| OTU_955   | 7.85E-01 | 6.04E-01 | 2.73E-03 | 8.89  | 3.38  | Enterococcus_dispar_98              | Bacteria_Firmicutes_62_Bacilli_62_Lactobacillales_60_Carnobacteriaceae_52_Isobaculum_32                              |
| OTU_208   | 8.25E-01 | 6.63E-01 | 8.83E-02 | 15.96 | 0.20  | Flintibacter_butyracus_91           | Bacteria_Firmicutes_Clostridia_Clostridiales_Ruminococcaceae_94_Flintibacter_53                                      |
| OTU_599   | 7.10E-01 | 9.46E-01 | 9.37E-01 | 2.63  | 2.71  | Collinsella_aerofaciens_100         | Bacteria_Actinobacteria_93_Coriobacteriia_93_Coriobacteriales_92_Coriobacteriaceae_91_Collinsella_86                 |
| OTU_623   | 7.59E-01 | 6.04E-01 | 2.15E-01 | 7.49  | 3.03  | Fusobacterium_mortiferum_90         | Bacteria_Fusobacteria_85_Fusobacteriia_85_Fusobacteriales_85_Fusobacteriaceae_85_Cetobacterium_55                    |
| OTU_829   | 9.08E-01 | 9.27E-01 | 1.32E-02 | 2.64  | 8.51  | Bacteroides_fragilis_95             | Bacteria_Bacteroidetes_Bacteroidia_Bacteroidales_Bacteroidaceae_Bacteroides_100                                      |
| OTU_1963  | 9.31E-01 | 8.28E-01 | 2.89E-03 | 3.55  | 6.27  | Hungatella_hathewayi_89             | Bacteria_Firmicutes_99_Bacilli_57_Lactobacillales_53_Carnobacteriaceae_52_Isobaculum_44                              |
| OTU_248   | 7.58E-01 | 9.20E-01 | 2.12E-01 | 9.87  | 0.92  | Bacteroides_stercoris_97            | Bacteria_Bacteroidetes_Bacteroidia_Bacteroidales_Bacteroidaceae_Bacteroides_82                                       |
| OTU_636   | 7.07E-01 | 9.97E-01 | 1.14E-04 | 9.39  | 1.52  | Streptococcus_gordonii_100          | Bacteria_Proteobacteria_91_Gammaproteobacteria_91_Enterobacterales_89_Enterobacteriaceae_83_Pseudescherichia_83      |
| OTU_195   | 7.07E-01 | 6.04E-01 | 2.10E-01 | 6.79  | 0.63  | Bacteroides_eggerthii_100           | Bacteria_Bacteroidetes_Bacteroidia_Bacteroidales_Bacteroidaceae_Bacteroides_100                                      |
| OTU_1234  | 9.58E-01 | 8.65E-01 | 2.63E-02 | 3.73  | 6.12  | Escherichia_albertii_95             | Bacteria_Proteobacteria_Gammaproteobacteria_Enterobacterales_Enterobacteriaceae_Pseudescherichia_58                  |
| OTU_358   | 9.45E-01 | 8.63E-01 | 5.62E-02 | 2.61  | 7.02  | Clostridium_sartagoforme_89         | Bacteria_Proteobacteria_72_Gammaproteobacteria_72_Enterobacterales_71_Enterobacteriaceae_71_Pseudescherichia_66      |
| OTU_11352 | 9.32E-01 | 6.14E-01 | 6.56E-01 | 6.40  | 5.88  | Roseburia_inulinivorans_90          | Bacteria_Firmicutes_Clostridia_69_Clostridiales_69_Lachnospiraceae_69_Bariatricus_35                                 |
| OTU_133   | NA       | 9.69E-01 | 6.30E-02 | 0.00  | 5.27  | Methylophilus_luteus_100            | Bacteria_Proteobacteria_Betaproteobacteria_Nitrosomonadales_Methylophilaceae_Methylophilus_100                       |
| OTU_2266  | 9.08E-01 | 7.11E-01 | 4.59E-02 | 2.78  | 6.65  | Enterocloster_asparagiformis_97     | Bacteria_Firmicutes_Clostridia_Clostridiales_Lachnospiraceae_Enterocloster_49                                        |
| OTU_3389  | 9.08E-01 | 7.36E-01 | 5.05E-02 | 7.36  | 4.58  | Kineothrix_allysoides_95            | Bacteria_Firmicutes_Clostridia_Clostridiales_Lachnospiraceae_Clostridium_XIVa_66                                     |
| OTU_1366  | 7.07E-01 | 7.31E-01 | 4.26E-08 | 9.33  | 2.08  | Bacteroides_uniformis_98            | Bacteria_Bacteroidetes_Bacteroidia_Bacteroidales_Bacteroidaceae_Bacteroides_47                                       |
| OTU_624   | 7.07E-01 | 6.44E-01 | 1.06E-01 | 3.14  | 5.10  | Veillonella_magna_91                | Bacteria_Firmicutes_Negativicutes_Veillonellales_70_Veillonellaceae_70_Veillonella_70                                |
| OTU_1371  | 9.46E-01 | 6.04E-01 | 5.97E-01 | 5.38  | 5.98  | Clostridium_symbiosum_95            | Bacteria_Firmicutes_Clostridia_Clostridiales_Lachnospiraceae_Clostridium_XIVa_56                                     |
| OTU_950   | 7.07E-01 | 6.72E-01 | 1.67E-01 | 8.21  | 0.65  | Veillonella_atypica_90              | Bacteria_Firmicutes_Negativicutes_83_Selenomonadales_39_Sporomusaceae_36_Anaerobius_33                               |
| OTU_156   | 7.57E-01 | 6.14E-01 | 7.91E-02 | 0.85  | 0.19  | Alistipes_anderdonkii_100           | Bacteria_Bacteroidetes_Bacteroidia_Bacteroidales_Rikenellaceae_Alistipes_100                                         |
| OTU_435   | 8.94E-01 | 7.31E-01 | 1.68E-02 | 9.63  | 2.03  | Sutterella_massiliensis_97          | Bacteria_Proteobacteria_Betaproteobacteria_Burkholderiales_Sutterellaceae_Sutterella_100                             |
| OTU_694   | 7.07E-01 | 6.04E-01 | 6.58E-04 | 8.93  | 2.97  | Clostridium_perfringens_98          | Bacteria_Firmicutes_Erysipelotrichia_68_Erysipelotrichales_68_Erysipelatoclostridiaceae_68_Erysipelatoclostridium_68 |
| OTU_917   | 9.59E-01 | 9.65E-01 | 1.36E-01 | 4.47  | 6.60  | Enterococcus_hirae_96               | Bacteria_Firmicutes_Bacilli_Lactobacillales_Enterococcaceae_83_Vagococcus_42                                         |
| OTU_15680 | 1.00E+00 | 6.83E-01 | 2.76E-02 | 6.53  | 4.09  | Enterococcus_faecalis_98            | Bacteria_Firmicutes_Bacilli_Lactobacillales_Enterococcaceae_Enterococcus_96                                          |
| OTU_1487  | 9.65E-01 | 6.72E-01 | 9.89E-01 | 6.39  | 6.38  | Roseburia_inulinivorans_97          | Bacteria_Firmicutes_Clostridia_Clostridiales_Lachnospiraceae_Roseburia_97                                            |
| OTU_1497  | 7.82E-01 | 8.36E-01 | 1.61E-02 | 3.48  | 6.22  | Escherichia_albertii_92             | Bacteria_Proteobacteria_95_Gammaproteobacteria_95_Enterobacterales_95_Enterobacteriaceae_95_Pseudescherichia_87      |
| OTU_635   | 9.67E-01 | 6.04E-01 | 1.72E-03 | 10.41 | 0.95  | Streptococcus_gordonii_91           | Bacteria_Firmicutes_Bacilli_95_Lactobacillales_88_Streptococcaceae_49_Streptococcus_43                               |
| OTU_455   | 9.06E-01 | 9.77E-01 | 2.69E-03 | 1.32  | 9.05  | Pseudescherichia_vulneris_99        | Bacteria_Proteobacteria_64_Gammaproteobacteria_64_Enterobacterales_64_Enterobacteriaceae_64_Pseudescherichia_63      |
| OTU_745   | 8.61E-01 | 6.81E-01 | 2.33E-04 | 12.29 | 1.01  | Streptococcus_cristatus_96          | Bacteria_Firmicutes_Bacilli_Lactobacillales_Streptococcaceae_46_Streptococcus_46                                     |
| OTU_590   | 7.07E-01 | 6.04E-01 | 5.91E-01 | 4.91  | 6.93  | Dialister_succinatiphilus_89        | Bacteria_Proteobacteria_70_Gammaproteobacteria_70_Enterobacterales_70_Enterobacteriaceae_68_Pseudescherichia_68      |
| OTU_607   | 8.12E-01 | 6.14E-01 | 5.10E-01 | 6.44  | 4.97  | Enterococcus_hirae_91               | Bacteria_Firmicutes_Clostridia_77_Clostridiales_77_Lachnospiraceae_76_Merdimonas_17                                  |
| OTU_787   | 9.53E-01 | 9.46E-01 | 5.01E-01 | 5.71  | 6.84  | Roseburia_inulinivorans_93          | Bacteria_Firmicutes_Clostridia_93_Clostridiales_93_Lachnospiraceae_92_Ruminococcus_7                                 |
| OTU_20240 | 8.25E-01 | 6.04E-01 | 2.77E-06 | 9.44  | 3.37  | Bacteroides_uniformis_97            | Bacteria_Bacteroidetes_Bacteroidia_Bacteroidales_Bacteroidaceae_Bacteroides_100                                      |
| OTU_3901  | 7.12E-01 | 8.28E-01 | 1.64E-04 | 3.40  | 6.30  | Enterocloster_citroniae_93          | Bacteria_Firmicutes_97_Clostridia_97_Clostridiales_97_Lachnospiraceae_97_Enterocloster_80                            |
| OTU_1488  | 1.00E+00 | 8.53E-01 | 1.32E-02 | 4.29  | 7.13  | Enterocloster_clostridioformis_98   | Bacteria_Firmicutes_84_Clostridia_84_Clostridiales_84_Lachnospiraceae_84_Enterocloster_44                            |
| OTU_8474  | 9.38E-01 | 9.66E-01 | 2.35E-02 | 7.97  | 4.71  | Bacteroides_xylanisolvans_97        | Bacteria_Bacteroidetes_Bacteroidia_Bacteroidales_Bacteroidaceae_Bacteroides_100                                      |
| OTU_1381  | 7.07E-01 | 5.62E-01 | 2.00E-02 | 6.95  | 2.89  | Veillonella_atypica_96              | Bacteria_Firmicutes_Negativicutes_Veillonellales_Veillonellaceae_Veillonella_100                                     |
| OTU_4905  | 7.07E-01 | 6.50E-01 | 6.51E-01 | 5.59  | 3.96  | Kosakonia_quasisachari_97           | Bacteria_Proteobacteria_Gammaproteobacteria_Enterobacterales_Enterobacteriaceae_94_Leclercia_21                      |
| OTU_425   | 7.07E-01 | 7.77E-01 | 9.35E-01 | 4.83  | 5.03  | Serratia_marcescens_91              | Bacteria_Proteobacteria_Gammaproteobacteria_95_Enterobacterales_95_Enterobacteriaceae_95_Pseudescherichia_83         |
| OTU_277   | 7.07E-01 | 6.47E-01 | 7.73E-03 | 0.20  | 0.91  | Actinobacillus_porcinus_96          | Bacteria_Proteobacteria_Gammaproteobacteria_Pasteurellales_94_Pasteurellaceae_94_Conservatibacter_24                 |
| OTU_7373  | 9.75E-01 | 9.86E-01 | 4.58E-03 | 3.62  | 5.94  | Enterocloster_citroniae_97          | Bacteria_Firmicutes_Clostridia_Clostridiales_Lachnospiraceae_Enterocloster_99                                        |
| OTU_1742  | 8.06E-01 | 8.72E-01 | 1.68E-02 | 2.78  | 7.45  | Faecalibacterium_prausnitzii_94     | Bacteria_Firmicutes_Clostridia_Clostridiales_Ruminococcaceae_98_Faecalibacterium_54                                  |
| OTU_1420  | 7.68E-01 | 9.70E-01 | 6.55E-04 | 4.23  | 0.91  | Bifidobacterium_callitrichidarum_92 | Bacteria_Actinobacteria_98_Actinobacteria_98_Bifidobacteriales_98_Bifidobacteriaceae_98_Pseudoscardovia_41           |
| OTU_239   | 9.99E-01 | 7.32E-01 | 3.66E-05 | 6.63  | 2.15  | Eubacterium_ventriosum_99           | Bacteria_Firmicutes_Clostridia_Clostridiales_Lachnospiraceae_Lachnospiraceae_incertae_sedis_100                      |
| OTU_11560 | 8.33E-01 | 7.97E-01 | 1.71E-02 | 7.22  | 3.38  | Bacteroides_xylanisolvans_98        | Bacteria_Bacteroidetes_Bacteroidia_Bacteroidales_Bacteroidaceae_Bacteroides_100                                      |
| OTU_1375  | 8.06E-01 | 6.04E-01 | 8.12E-01 | 4.84  | 5.22  | Clostridium_symbiosum_96            | Bacteria_Firmicutes_Clostridia_Clostridiales_Lachnospiraceae_Clostridium_XIVa_69                                     |
| OTU_709   | 7.07E-01 | 7.73E-01 | 3.77E-02 | 3.30  | 4.96  | Escherichia_albertii_90             | Bacteria_Proteobacteria_58_Gammaproteobacteria_58_Enterobacterales_58_Enterobacteriaceae_58_Pseudescherichia_56      |
| OTU_1945  | 7.57E-01 | 8.77E-01 | 6.47E-02 | 4.99  | 7.55  | Pseudescherichia_vulneris_97        | Bacteria_Proteobacteria_Gammaproteobacteria_Enterobacterales_Enterobacteriaceae_Escherichia/Shigella_76              |
| OTU_532   | 9.31E-01 | 9.25E-01 | 1.14E-04 | 7.15  | 2.02  | Intestinibacillus_massiliensis_100  | Bacteria_Firmicutes_Clostridia_Clostridiales_Eubacteriaceae_90_Intestinibacillus_90                                  |

|            |          |          |          |       |      |                                     |                                                                                                                 |
|------------|----------|----------|----------|-------|------|-------------------------------------|-----------------------------------------------------------------------------------------------------------------|
| OTU_958    | 7.07E-01 | 6.04E-01 | 1.91E-05 | 5.66  | 0.69 | Parabacteroides_distasonis_96       | Bacteria_Bacteroidetes_Bacteroidia_Bacteroidales_Porphyromonadaceae_96_Parabacteroides_96                       |
| OTU_127    | 9.69E-01 | 6.81E-01 | 2.87E-02 | 2.24  | 0.71 | Barnesiella_intestinihominis_100    | Bacteria_Bacteroidetes_Bacteroidia_Bacteroidales_Barnesiellaceae_Barnesiella_100                                |
| OTU_24618  | 9.69E-01 | 9.12E-01 | 8.72E-04 | 4.05  | 8.32 | Bacteroides_faecis_97               | Bacteria_Bacteroidetes_Bacteroidia_Bacteroidales_Bacteroidaceae_Bacteroides_100                                 |
| OTU_351    | 7.07E-01 | 6.04E-01 | 7.58E-02 | 2.91  | 6.53 | Pseudescherichia_vulneris_97        | Bacteria_Proteobacteria_82_Gammaproteobacteria_82_Enterobacterales_81_Enterobacteriaceae_81_Pseudescherichia_62 |
| OTU_922    | 9.93E-01 | 7.44E-01 | 8.90E-02 | 2.82  | 6.22 | Pseudescherichia_vulneris_98        | Bacteria_Proteobacteria_99_Gammaproteobacteria_99_Enterobacterales_98_Enterobacteriaceae_98_Pseudescherichia_75 |
| OTU_2833   | 9.73E-01 | 8.51E-01 | 1.84E-01 | 5.23  | 3.62 | Lachnodostridium_pacaense_98        | Bacteria_Firmicutes_Clostridia_Clostridiales_Lachnospiraceae_Clostridium_XIVa_61                                |
| OTU_5420   | 7.07E-01 | 7.24E-01 | 2.35E-04 | 9.38  | 1.66 | Bacteroides_thetaiotaomicron_97     | Bacteria_Bacteroidetes_Bacteroidia_Bacteroidales_Bacteroidaceae_Bacteroides_99                                  |
| OTU_343    | 7.07E-01 | 9.77E-01 | 5.34E-02 | 3.78  | 1.13 | Hungatella_effluvii_89              | Bacteria_Firmicutes_Clostridia_Clostridiales_Lachnospiraceae_Merdimonas_18                                      |
| OTU_225    | 1.00E+00 | 6.04E-01 | 1.60E-02 | 8.32  | 0.56 | Eubacterium_coprostanoligenes_96    | Bacteria_Firmicutes_Clostridia_99_Clostridiales_99_Ruminococcaceae_87_Paludicola_20                             |
| OTU_738    | 8.25E-01 | 8.75E-01 | 1.20E-02 | 2.10  | 5.86 | Acidaminococcus_intestini_92        | Bacteria_Firmicutes_Negativicutes_Acidaminococcales_Acidaminococcaceae_Phascolartobacterium_100                 |
| OTU_3751   | 9.64E-01 | 6.10E-01 | 1.32E-02 | 7.25  | 2.10 | Pseudescherichia_vulneris_91        | Bacteria_Proteobacteria_Betaproteobacteria_90_Burkholderiales_90_Sutterellaceae_90_Sutterella_90                |
| OTU_559    | 7.07E-01 | 9.61E-01 | 6.66E-04 | 1.43  | 8.66 | Phascolartobacterium_faecium_98     | Bacteria_Firmicutes_Negativicutes_97_Acidaminococcales_97_Acidaminococcaceae_97_Phascolartobacterium_97         |
| OTU_1466   | 9.95E-01 | 6.72E-01 | 2.40E-01 | 6.07  | 4.61 | Coprococcus_comes_96                | Bacteria_Firmicutes_Clostridia_Clostridiales_Lachnospiraceae_Coprococcus_69                                     |
| OTU_531    | 7.07E-01 | 6.47E-01 | 5.05E-02 | 3.14  | 0.65 | Phocaeicola_vulgatus_96             | Bacteria_Bacteroidetes_Bacteroidia_Bacteroidales_Bacteroidaceae_99_Phocaeicola_99                               |
| OTU_626    | 7.07E-01 | 9.70E-01 | 1.45E-02 | 10.42 | 1.72 | Bacteroides_stercoris_100           | Bacteria_Bacteroidetes_99_Bacteroidia_98_Bacteroidales_98_Bacteroidaceae_94_Mediterranea_54                     |
| OTU_107068 | 7.07E-01 | 8.17E-01 | 2.45E-01 | 8.60  | 1.12 | Veillonella_tobetsuensis_98         | Bacteria_Firmicutes_Negativicutes_Veillonellales_Veillonellaceae_Veillonella_100                                |
| OTU_4528   | 8.61E-01 | 6.04E-01 | 2.80E-01 | 6.30  | 4.96 | Veillonella_tobetsuensis_96         | Bacteria_Firmicutes_Negativicutes_97_Veillonellales_87_Veillonellaceae_87_Veillonella_83                        |
| OTU_819    | 7.07E-01 | 8.14E-01 | 6.11E-07 | 9.56  | 0.72 | Bacteroides_uniformis_97            | Bacteria_Bacteroidetes_Bacteroidia_Bacteroidales_Bacteroidaceae_Bacteroides_99                                  |
| OTU_695    | 9.08E-01 | 6.07E-01 | 2.39E-02 | 6.12  | 1.78 | Sutterella_wadsworthensis_99        | Bacteria_Proteobacteria_91_Betaproteobacteria_91_Burkholderiales_91_Sutterellaceae_90_Sutterella_90             |
| OTU_60649  | 9.64E-01 | 6.04E-01 | 1.49E-01 | 4.58  | 6.16 | Shigella_dysenteriae_96             | Bacteria_Proteobacteria_Gammaproteobacteria_Enterobacterales_Enterobacteriaceae_Pseudescherichia_68             |
| OTU_3581   | 9.63E-01 | 7.08E-01 | 7.02E-01 | 5.27  | 4.92 | Faecalicatena_orotica_97            | Bacteria_Firmicutes_Clostridia_Clostridiales_Lachnospiraceae_Clostridium_XIVa_94                                |
| OTU_21202  | 7.46E-01 | 8.51E-01 | 1.42E-01 | 4.49  | 2.50 | Faecalibacterium_prausnitzii_99     | Bacteria_Firmicutes_Clostridia_Clostridiales_Ruminococcaceae_Faecalibacterium_100                               |
| OTU_10599  | 9.10E-01 | 8.68E-01 | 3.60E-01 | 4.85  | 5.88 | Coprococcus_comes_97                | Bacteria_Firmicutes_Clostridia_Clostridiales_Lachnospiraceae_Coprococcus_59                                     |
| OTU_42132  | 7.89E-01 | 7.49E-01 | 1.33E-04 | 11.16 | 0.90 | Bacteroides_uniformis_96            | Bacteria_Bacteroidetes_Bacteroidia_Bacteroidales_Bacteroidaceae_Bacteroides_100                                 |
| OTU_1471   | 8.48E-01 | 6.40E-01 | 3.74E-02 | 4.79  | 1.49 | Bacteroides_uniformis_95            | Bacteria_Bacteroidetes_Bacteroidia_Bacteroidales_Bacteroidaceae_Phocaeicola_88                                  |
| OTU_2107   | 7.84E-01 | 6.04E-01 | 1.45E-01 | 3.21  | 7.13 | Lachnodostridium_pacaense_96        | Bacteria_Firmicutes_Clostridia_Clostridiales_Lachnospiraceae_Clostridium_XIVa_30                                |
| OTU_136    | 7.57E-01 | 6.96E-01 | 1.25E-01 | 2.92  | 0.64 | Mitsuokella_jalaludinii_100         | Bacteria_Firmicutes_Negativicutes_Selenomonadales_Selenomonadaceae_Mitsuokella_100                              |
| OTU_431    | 7.91E-01 | 9.35E-01 | 1.23E-02 | 1.94  | 8.53 | Bacteroides_fragilis_100            | Bacteria_Bacteroidetes_94_Bacteroidia_94_Bacteroidales_94_Bacteroidaceae_92_Bacteroides_74                      |
| OTU_929    | 7.59E-01 | 8.42E-01 | 1.97E-02 | 1.22  | 7.49 | Clostridium_tepidum_94              | Bacteria_Firmicutes_Clostridia_Clostridiales_Lachnospiraceae_44_Mobilitalea_7                                   |
| OTU_4955   | 9.99E-01 | 4.60E-01 | 4.12E-02 | 3.26  | 4.92 | Enterococcus_faecalis_97            | Bacteria_Firmicutes_Bacilli_Lactobacillales_Enterococcaceae_87_Enterococcus_64                                  |
| OTU_29847  | 9.06E-01 | 6.04E-01 | 1.30E-03 | 2.37  | 5.64 | Enterococcus_faecalis_98            | Bacteria_Firmicutes_Bacilli_Lactobacillales_99_Enterococcaceae_89_Enterococcus_52                               |
| OTU_15669  | 7.07E-01 | 6.04E-01 | 9.78E-02 | 8.27  | 0.36 | Streptococcus_cristatus_98          | Bacteria_Firmicutes_Bacilli_Lactobacillales_Streptococcaceae_Streptococcus_100                                  |
| OTU_564    | 7.07E-01 | 6.04E-01 | 4.99E-04 | 8.26  | 1.30 | Streptococcus_gordonii_100          | Bacteria_Firmicutes_Bacilli_75_Lactobacillales_74_Streptococcaceae_72_Streptococcus_71                          |
| OTU_392    | 7.85E-01 | 6.04E-01 | 2.33E-02 | 1.54  | 3.02 | Enterococcus_faecalis_90            | Bacteria_Firmicutes_Clostridia_99_Clostridiales_99_Ruminococcaceae_99_Flavonifractor_99                         |
| OTU_371    | 7.57E-01 | 7.51E-01 | 2.05E-02 | 1.31  | 7.61 | Clostridium_symbiosum_92            | Bacteria_Firmicutes_Clostridia_Clostridiales_Lachnospiraceae_92_Clostridium_XIVa_49                             |
| OTU_3711   | 8.29E-01 | 8.83E-01 | 1.48E-03 | 5.71  | 2.79 | Dorea_longicatena_96                | Bacteria_Firmicutes_Clostridia_Clostridiales_Lachnospiraceae_Dorea_82                                           |
| OTU_349    | 9.38E-01 | 6.04E-01 | 5.50E-01 | 5.00  | 4.26 | Ruthenibacterium_lactatiformans_100 | Bacteria_Firmicutes_Clostridia_Clostridiales_Ruminococcaceae_Ruthenibacterium_100                               |
| OTU_12625  | 9.94E-01 | 6.04E-01 | 5.87E-04 | 7.68  | 2.54 | Bacteroides_thetaiotaomicron_97     | Bacteria_Bacteroidetes_Bacteroidia_Bacteroidales_Bacteroidaceae_Bacteroides_100                                 |
| OTU_62340  | 7.07E-01 | 6.04E-01 | 5.06E-01 | 3.03  | 1.30 | Veillonella_rososae_98              | Bacteria_Firmicutes_Negativicutes_Veillonellales_Veillonellaceae_Veillonella_100                                |
| OTU_476    | 7.07E-01 | 8.14E-01 | 1.40E-01 | 2.19  | 0.85 | Bifidobacterium_catenulatum_90      | Bacteria_Actinobacteria_Actinobacteria_Bifidobacteriales_Bifidobacteriaceae_Neocardovia_38                      |
| OTU_710    | 7.57E-01 | 7.77E-01 | 3.70E-02 | 2.61  | 4.00 | Flavonifractor_plautii_97           | Bacteria_Firmicutes_Clostridia_Clostridiales_Ruminococcaceae_Flavonifractor_100                                 |
| OTU_4592   | 9.67E-01 | 7.99E-01 | 4.59E-01 | 5.32  | 4.80 | Pseudescherichia_vulneris_96        | Bacteria_Proteobacteria_71_Gammaproteobacteria_71_Enterobacterales_71_Enterobacteriaceae_71_Pseudescherichia_66 |
| OTU_11535  | 9.84E-01 | 6.04E-01 | 3.99E-01 | 4.11  | 4.95 | Clostridium_scindens_97             | Bacteria_Firmicutes_Clostridia_Clostridiales_Lachnospiraceae_Clostridium_XIVa_95                                |
| OTU_1804   | 7.07E-01 | 6.51E-01 | 1.54E-01 | 4.36  | 6.18 | Bacteroides_faecis_96               | Bacteria_Bacteroidetes_Bacteroidia_Bacteroidales_Bacteroidaceae_Bacteroides_100                                 |
| OTU_387    | 9.08E-01 | 6.76E-01 | 1.69E-01 | 1.22  | 0.63 | Bifidobacterium_stercoris_97        | Bacteria_Actinobacteria_Actinobacteria_Bifidobacteriales_Bifidobacteriaceae_Bifidobacterium_97                  |
| OTU_924    | 8.97E-01 | 9.61E-01 | 1.46E-02 | 1.26  | 7.11 | Enterococcus_dispar_100             | Bacteria_Firmicutes_94_Bacilli_94_Lactobacillales_92_Carnobacteriaceae_71_Isobaculum_63                         |
| OTU_634    | 8.85E-01 | 9.25E-01 | 2.48E-02 | 8.78  | 0.74 | Bacteroides_kribbi_95               | Bacteria_Bacteroidetes_Bacteroidia_Bacteroidales_Bacteroidaceae_97_Bacteroides_97                               |
| OTU_1048   | 7.07E-01 | 9.12E-01 | 1.49E-01 | 2.46  | 0.65 | Phocaeicola_vulgatus_97             | Bacteria_Bacteroidetes_Bacteroidia_Bacteroidales_Bacteroidaceae_Bacteroides_61                                  |
| OTU_312    | 7.07E-01 | 6.04E-01 | 5.75E-01 | 3.65  | 5.70 | Hafnia_paralvei_99                  | Bacteria_Proteobacteria_Gammaproteobacteria_Enterobacterales_Hafniaceae_57_Hafnia_57                            |
| OTU_1465   | 9.65E-01 | 6.76E-01 | 1.28E-02 | 8.02  | 2.49 | Escherichia_marmotae_94             | Bacteria_Proteobacteria_Gammaproteobacteria_Enterobacterales_Enterobacteriaceae_99_Pseudescherichia_41          |
| OTU_2173   | 8.49E-01 | 7.99E-01 | 5.35E-02 | 6.74  | 4.19 | Bacteroides_xylanisolvans_98        | Bacteria_Bacteroidetes_84_Bacteroidia_84_Bacteroidales_84_Bacteroidaceae_84_Bacteroides_72                      |
| OTU_671    | 9.62E-01 | 6.14E-01 | 2.71E-03 | 9.68  | 0.92 | Streptococcus_gordonii_97           | Bacteria_Firmicutes_Clostridia_67_Clostridiales_67_Lachnospiraceae_67_Bariatricus_19                            |
| OTU_132    | 7.07E-01 | 6.08E-01 | 3.21E-01 | 8.60  | 0.75 | Harryflintia_acetispora_88          | Bacteria_Firmicutes_99_Clostridia_98_Clostridiales_98_Ruminococcaceae_81_Harryflintia_34                        |
| OTU_1382   | 7.57E-01 | 8.33E-01 | 2.23E-01 | 3.80  | 5.04 | Enterococcus_faecalis_90            | Bacteria_Firmicutes_Clostridia_94_Clostridiales_94_Lachnospiraceae_94_Bariatricus_75                            |
| OTU_464    | 7.81E-01 | 6.04E-01 | 2.14E-02 | 12.00 | 0.65 | Clostridium_tarantellae_98          | Bacteria_Firmicutes_Clostridia_Clostridiales_Clostridiaceae_1_Clostridium_sensu_stricto_98                      |
| OTU_832    | 9.68E-01 | 9.04E-01 | 2.85E-02 | 1.67  | 6.47 | Clostridium_tepidum_91              | Bacteria_Firmicutes_Bacilli_92_Lactobacillales_87_Carnobacteriaceae_63_Isobaculum_60                            |
| OTU_918    | 7.57E-01 | 6.49E-01 | 3.91E-03 | 3.54  | 0.98 | Phocaeicola_vulgatus_97             | Bacteria_Bacteroidetes_Bacteroidia_Bacteroidales_Bacteroidaceae_Phocaeicola_99                                  |
| OTU_1140   | 7.07E-01 | 9.98E-01 | 7.56E-01 | 3.87  | 4.34 | Pseudescherichia_vulneris_97        | Bacteria_Proteobacteria_Gammaproteobacteria_Enterobacterales_Enterobacteriaceae_Escherichia/Shigella_91         |
| OTU_354    | 7.07E-01 | 9.85E-01 | 2.32E-02 | 3.18  | 0.09 | Prevotella_copri_95                 | Bacteria_Bacteroidetes_Bacteroidia_Bacteroidales_Prevotellaceae_67_Prevotella_66                                |
| OTU_432    | 7.07E-01 | 8.50E-01 | 7.61E-02 | 2.24  | 0.60 | Bifidobacterium_stercoris_95        | Bacteria_Actinobacteria_Actinobacteria_97_Bifidobacteriales_95_Bifidobacteriaceae_95_Bifidobacterium_46         |
| OTU_1943   | 9.06E-01 | 7.07E-01 | 9.43E-01 | 4.83  | 4.93 | Clostridium_symbiosum_96            | Bacteria_Firmicutes_Clostridia_Clostridiales_Lachnospiraceae_Clostridium_XIVa_83                                |
| OTU_1028   | 7.07E-01 | 6.04E-01 | 9.05E-03 | 7.44  | 1.83 | Clostridium_perfringens_96          | Bacteria_Firmicutes_Clostridia_Clostridiales_Clostridiaceae_1_99_Clostridium_sensu_stricto_79                   |
| OTU_284    | 9.06E-01 | 6.04E-01 | 8.86E-01 | 4.48  | 4.24 | Acidaminococcus_intestini_93        | Bacteria_Firmicutes_Negativicutes_99_Acidaminococcales_98_Acidaminococcaceae_98_Acidaminococcus_98              |
| OTU_309    | 7.45E-01 | 6.04E-01 | 4.93E-01 | 1.10  | 3.20 | Bacteroides_mediterraneensis_99     | Bacteria_Bacteroidetes_Bacteroidia_Bacteroidales_Bacteroidaceae_Phocaeicola_100                                 |
| OTU_344    | 8.22E-01 | 9.10E-01 | 2.58E-01 | 7.87  | 0.61 | Bacteroides_stercoris_96            | Bacteria_Bacteroidetes_Bacteroidia_Bacteroidales_Bacteroidaceae_Phocaeicola_69                                  |
| OTU_1164   | 8.06E-01 | 9.67E-01 | 1.29E-01 | 4.71  | 3.38 | Enterococcus_dispar_100             | Bacteria_Firmicutes_Bacilli_Lactobacillales_93_Carnobacteriaceae_68_Isobaculum_57                               |
| OTU_2913   | 9.14E-01 | 6.04E-01 | 3.61E-04 | 7.37  | 2.54 | Falcatimonas_natans_94              | Bacteria_Firmicutes_Clostridia_Clostridiales_Lachnospiraceae_92_Enterocloster_23                                |



|           |          |          |          |       |      |                                    |                                                                                                                 |
|-----------|----------|----------|----------|-------|------|------------------------------------|-----------------------------------------------------------------------------------------------------------------|
| OTU_4301  | 9.38E-01 | 7.73E-01 | 5.66E-05 | 0.85  | 8.96 | Bacteroides_xylanisolvens_97       | Bacteria_Bacteroidetes_Bacteroidia_Bacteroidales_Bacteroidaceae_Bacteroides_100                                 |
| OTU_1115  | 9.67E-01 | 6.04E-01 | 6.36E-01 | 4.39  | 5.39 | Acidaminococcus_fermentans_94      | Bacteria_Firmicutes_Negativicutes_Acidaminococcales_Acidaminococcaceae_Acidaminococcus_100                      |
| OTU_1157  | 9.06E-01 | 6.04E-01 | 5.52E-01 | 1.01  | 1.48 | Phocaeicola_coprocola_97           | Bacteria_Bacteroidetes_Bacteroidia_Bacteroidales_Bacteroidaceae_Phocaeicola_77                                  |
| OTU_1415  | 7.82E-01 | 7.94E-01 | 9.79E-03 | 3.28  | 5.86 | Shigella_dysenteriae_91            | Bacteria_Proteobacteria_96_Gammaproteobacteria_96_Enterobacterales_96_Enterobacteriaceae_96_Pseudescherichia_96 |
| OTU_1890  | 7.59E-01 | 6.16E-01 | 2.66E-03 | 6.59  | 2.69 | Clostridium_perfringens_96         | Bacteria_Firmicutes_Clostridia_75_Clostridiales_75_Clostridiaceae_1_75_Sarcina_26                               |
| OTU_408   | 9.14E-01 | 6.05E-01 | 1.69E-01 | 0.98  | 1.47 | Fusicatenibacter_saccharivorans_91 | Bacteria_Firmicutes_99_Clostridia_99_Clostridiales_99_Lachnospiraceae_98_Merdimonas_12                          |
| OTU_1020  | 9.38E-01 | 6.04E-01 | 1.72E-01 | 2.53  | 5.71 | Clostridium_tarantellae_98         | Bacteria_Firmicutes_Clostridia_Clostridiales_Clostridiaceae_1_Clostridium_sensu_stricto_100                     |
| OTU_206   | NA       | 7.25E-01 | 1.10E-01 | 0.00  | 7.34 | Azohydromonas_lata_99              | Bacteria_Proteobacteria_Betaproteobacteria_Burkholderiales_Alcaligenaceae_68_Azohydromonas_68                   |
| OTU_9303  | 7.12E-01 | 6.14E-01 | 3.54E-06 | 7.37  | 2.25 | Bacteroides_uniformis_96           | Bacteria_Bacteroidetes_Bacteroidia_Bacteroidales_Bacteroidaceae_Bacteroides_100                                 |
| OTU_2318  | 7.07E-01 | 9.90E-01 | 4.33E-01 | 3.12  | 4.04 | Phocaeicola_coprophilus_95         | Bacteria_Bacteroidetes_Bacteroidia_Bacteroidales_Bacteroidaceae_Phocaeicola_64                                  |
| OTU_27424 | 9.98E-01 | 7.66E-01 | 3.78E-01 | 4.53  | 6.60 | Bacteroides_thetaiotaomicron_98    | Bacteria_Bacteroidetes_Bacteroidia_Bacteroidales_Bacteroidaceae_Bacteroides_100                                 |
| OTU_2329  | 9.08E-01 | 8.65E-01 | 1.68E-02 | 3.37  | 5.24 | Pseudescherichia_vulneris_92       | Bacteria_Proteobacteria_Gammaproteobacteria_Enterobacterales_Enterobacteriaceae_97_Escherichia/Shigella_79      |
| OTU_236   | 9.60E-01 | 9.98E-01 | 5.92E-01 | 0.37  | 0.25 | Collinsella_aerofaciens_100        | Bacteria_Actinobacteria_85_Coriobacteriia_85_Coriobacteriales_84_Coriobacteriaceae_82_Collinsella_80            |
| OTU_427   | 8.47E-01 | 8.12E-01 | 1.35E-03 | 8.32  | 1.11 | Clostridium_perfringens_91         | Bacteria_Firmicutes_99_Clostridia_99_Clostridiales_99_Clostridiaceae_1_99_Desnuesiella_39                       |
| OTU_488   | 8.25E-01 | 9.95E-01 | 2.42E-02 | 9.02  | 1.64 | Sutterella_massiliensis_98         | Bacteria_Proteobacteria_98_Betaproteobacteria_98_Burkholderiales_97_Sutterellaceae_92_Sutterella_92             |
| OTU_5063  | 8.16E-01 | 8.10E-01 | 2.72E-01 | 5.26  | 4.32 | Bacteroides_kribbi_97              | Bacteria_Bacteroidetes_52_Bacteroidia_52_Bacteroidales_52_Bacteroidaceae_52_Mediterranea_27                     |
| OTU_1101  | 8.06E-01 | 8.65E-01 | 3.45E-02 | 10.43 | 1.00 | Clostridium_perfringens_97         | Bacteria_Firmicutes_Clostridia_Clostridiales_Clostridiaceae_1_Clostridium_sensu_stricto_100                     |
| OTU_252   | 9.16E-01 | 6.05E-01 | 6.70E-02 | 6.01  | 1.15 | Parabacteroides_goldsteinii_100    | Bacteria_Bacteroidetes_Bacteroidia_Bacteroidales_Porphyromonadaceae_Parabacteroides_100                         |
| OTU_770   | 8.57E-01 | 9.70E-01 | 5.10E-03 | 8.59  | 1.42 | Clostridium_perfringens_97         | Bacteria_Firmicutes_99_Clostridia_Clostridiales_Clostridiaceae_1_98_Sarcina_23                                  |
| OTU_9673  | 7.19E-01 | 9.48E-01 | 2.14E-01 | 4.54  | 5.37 | Shigella_dysenteriae_95            | Bacteria_Proteobacteria_Gammaproteobacteria_Enterobacterales_Enterobacteriaceae_Pseudescherichia_74             |
| OTU_27527 | 7.07E-01 | 6.04E-01 | 9.78E-02 | 1.97  | 4.74 | Lachnodostridium_pacaense_98       | Bacteria_Firmicutes_Clostridia_Clostridiales_Lachnospiraceae_Enterocloster_44                                   |
| OTU_32056 | 8.30E-01 | 9.69E-01 | 1.04E-02 | 7.08  | 3.54 | Bacteroides_xylanisolvens_98       | Bacteria_Bacteroidetes_Bacteroidia_Bacteroidales_Bacteroidaceae_Bacteroides_100                                 |
| OTU_20257 | 7.12E-01 | 9.54E-01 | 4.33E-02 | 4.23  | 6.47 | Bacteroides_ovatus_97              | Bacteria_Bacteroidetes_Bacteroidia_Bacteroidales_Bacteroidaceae_Bacteroides_100                                 |
| OTU_438   | 7.91E-01 | 6.10E-01 | 6.15E-01 | 1.72  | 2.54 | Collinsella_aerofaciens_96         | Bacteria_Actinobacteria_Coriobacteriia_Coriobacteriales_Coriobacteriaceae_98_Collinsella_74                     |
| OTU_511   | 9.41E-01 | 7.73E-01 | 2.07E-02 | 0.62  | 2.87 | Phocaeicola_coprophilus_95         | Bacteria_Bacteroidetes_Bacteroidia_Bacteroidales_Bacteroidaceae_Phocaeicola_55                                  |
| OTU_213   | 9.67E-01 | 6.04E-01 | 4.63E-02 | 7.83  | 0.77 | Faecalicatena_orotica_96           | Bacteria_Firmicutes_Clostridia_Clostridiales_Lachnospiraceae_Schaeclerella_100                                  |
| OTU_459   | 1.00E+00 | 8.68E-01 | 3.45E-01 | 0.46  | 0.76 | Bifidobacterium_longum_92          | Bacteria_Actinobacteria_98_Actinobacteria_98_Bifidobacteriales_98_Bifidobacteriaceae_98_Pseudoscardovia_33      |
| OTU_840   | 7.07E-01 | 8.26E-01 | 5.87E-04 | 7.52  | 1.32 | Streptococcus_lactarius_96         | Bacteria_Firmicutes_Bacilli_Lactobacillales_Streptococcaceae_Streptococcus_100                                  |
| OTU_10434 | 8.97E-01 | 8.11E-01 | 8.15E-01 | 4.66  | 4.31 | Clostridium_symbiosum_96           | Bacteria_Firmicutes_Clostridia_Clostridiales_Lachnospiraceae_Clostridium_XIVa_47                                |
| OTU_3655  | 7.81E-01 | 6.04E-01 | 1.29E-02 | 5.60  | 1.77 | Bifidobacterium_saguini_91         | Bacteria_Actinobacteria_84_Actinobacteria_84_Bifidobacteriales_84_Bifidobacteriaceae_84_Pseudoscardovia_57      |
| OTU_418   | 7.07E-01 | 8.34E-01 | 3.01E-02 | 2.27  | 0.57 | Veillonella_parvula_90             | Bacteria_Firmicutes_95_Negativicutes_95_Veillonellales_92_Veillonellaceae_92_Veillonella_91                     |
| OTU_20196 | 7.57E-01 | 9.25E-01 | 1.18E-02 | 3.16  | 4.61 | Pseudescherichia_vulneris_97       | Bacteria_Proteobacteria_Gammaproteobacteria_Enterobacterales_Enterobacteriaceae_Escherichia/Shigella_50         |
| OTU_4045  | 8.06E-01 | 6.72E-01 | 4.30E-01 | 2.37  | 1.86 | Faecalibacterium_prausnitzii_98    | Bacteria_Firmicutes_Clostridia_Clostridiales_Ruminococcaceae_Faecalibacterium_100                               |
| OTU_731   | 7.07E-01 | 6.16E-01 | 3.83E-02 | 0.29  | 0.86 | Kluyvera_cryptorescens_95          | Bacteria_Proteobacteria_Gammaproteobacteria_Enterobacterales_98_Enterobacteriaceae_97_Lelliottia_33             |
| OTU_923   | 7.85E-01 | 8.75E-01 | 6.01E-02 | 3.22  | 5.15 | Clostridium_symbiosum_94           | Bacteria_Firmicutes_Clostridia_Clostridiales_Lachnospiraceae_Clostridium_XIVa_57                                |
| OTU_843   | 9.49E-01 | 7.40E-01 | 8.89E-01 | 2.97  | 2.84 | Flintibacter_butyricus_93          | Bacteria_Firmicutes_Clostridia_Clostridiales_Lachnospiraceae_54_Merdimonas_15                                   |
| OTU_401   | 7.11E-01 | 6.04E-01 | 1.10E-01 | 6.53  | 1.04 | Anaerotaenia_torta_98              | Bacteria_Firmicutes_Clostridia_Clostridiales_Lachnospiraceae_Herbinix_49                                        |
| OTU_340   | 7.07E-01 | 6.60E-01 | 2.16E-01 | 5.89  | 2.37 | Collinsella_aerofaciens_94         | Bacteria_Actinobacteria_98_Coriobacteriia_98_Coriobacteriales_98_Coriobacteriaceae_97_Collinsella_97            |
| OTU_784   | 9.87E-01 | 7.31E-01 | 1.76E-03 | 2.99  | 6.18 | Escherichia_coli_90                | Bacteria_Proteobacteria_95_Gammaproteobacteria_95_Enterobacterales_95_Enterobacteriaceae_94_Pseudescherichia_93 |
| OTU_1068  | 1.00E+00 | 9.09E-01 | 1.67E-03 | 0.97  | 3.88 | Phocaeicola_coprophilus_98         | Bacteria_Bacteroidetes_89_Bacteroidia_89_Bacteroidales_89_Bacteroidaceae_89_Phocaeicola_83                      |
| OTU_1432  | 8.17E-01 | 6.04E-01 | 1.35E-02 | 6.53  | 2.79 | Peptoniphilus_harei_96             | Bacteria_Firmicutes_Clostridia_Clostridiales_Peptoniphilaceae_Peptoniphilus_100                                 |
| OTU_3324  | 9.87E-01 | 7.20E-01 | 4.12E-03 | 3.03  | 5.47 | Enterococcus_faecalis_97           | Bacteria_Firmicutes_Bacilli_99_Lactobacillales_98_Carnobacteriaceae_39_Isobaculum_32                            |
| OTU_1368  | 7.75E-01 | 6.58E-01 | 1.32E-03 | 6.75  | 2.06 | Clostridium_tarantellae_92         | Bacteria_Firmicutes_Clostridia_Clostridiales_Lachnospiraceae_76_Mobilitalea_15                                  |
| OTU_217   | 9.42E-01 | 6.04E-01 | 4.47E-01 | 1.15  | 1.64 | Prevotella_oralis_91               | Bacteria_Bacteroidetes_Bacteroidia_Bacteroidales_Prevotellaceae_Prevotella_100                                  |
| OTU_1008  | 1.00E+00 | 7.11E-01 | 1.89E-06 | 8.67  | 0.95 | Bacteroides_xylanisolvens_96       | Bacteria_Bacteroidetes_Bacteroidia_Bacteroidales_Bacteroidaceae_Bacteroides_100                                 |
| OTU_4745  | 9.38E-01 | 6.04E-01 | 2.96E-03 | 7.20  | 1.98 | Enterococcus_thailandicus_93       | Bacteria_Firmicutes_Bacilli_61_Lactobacillales_60_Carnobacteriaceae_20_Isobaculum_8                             |
| OTU_595   | 7.91E-01 | 6.04E-01 | 3.72E-01 | 2.31  | 3.22 | Clostridium_polysaccharolyticum_92 | Bacteria_Firmicutes_99_Clostridia_99_Clostridiales_99_Lachnospiraceae_67_Anaerotaenia_10                        |
| OTU_2162  | 9.64E-01 | 9.18E-01 | 6.91E-04 | 7.50  | 2.35 | Bacteroides_acidifaciens_96        | Bacteria_Bacteroidetes_Bacteroidia_Bacteroidales_Bacteroidaceae_Bacteroides_100                                 |
| OTU_457   | 9.60E-01 | 9.25E-01 | 8.55E-01 | 1.36  | 1.24 | Faecalibacterium_prausnitzii_91    | Bacteria_Firmicutes_Clostridia_Clostridiales_Lachnospiraceae_71_Merdimonas_15                                   |
| OTU_1027  | 7.73E-01 | 6.04E-01 | 1.84E-01 | 4.56  | 3.13 | Enterococcus_dispar_98             | Bacteria_Firmicutes_Bacilli_97_Lactobacillales_91_Carnobacteriaceae_61_Isobaculum_59                            |
| OTU_1045  | 9.92E-01 | 8.83E-01 | 3.05E-02 | 7.41  | 3.15 | Bacteroides_cellulosilyticus_88    | Bacteria_Firmicutes_52_Clostridia_52_Clostridiales_52_Lachnospiraceae_52_Lactonifactor_17                       |
| OTU_1195  | 7.07E-01 | 6.04E-01 | 6.70E-02 | 3.54  | 0.84 | Bacteroides_uniformis_96           | Bacteria_Bacteroidetes_Bacteroidia_Bacteroidales_Bacteroidaceae_Phocaeicola_56                                  |
| OTU_485   | 7.81E-01 | 9.46E-01 | 8.44E-03 | 4.71  | 0.37 | Parabacteroides_distasonis_95      | Bacteria_Bacteroidetes_Bacteroidia_Bacteroidales_Porphyromonadaceae_89_Parabacteroides_89                       |
| OTU_1436  | 7.07E-01 | 7.23E-01 | 3.52E-03 | 7.50  | 2.59 | Roseburia_inulinivorans_97         | Bacteria_Firmicutes_Clostridia_Clostridiales_Lachnospiraceae_Roseburia_73                                       |
| OTU_934   | 7.57E-01 | 9.60E-01 | 9.37E-02 | 5.27  | 2.51 | Collinsella_aerofaciens_100        | Bacteria_Actinobacteria_88_Coriobacteriia_88_Coriobacteriales_88_Coriobacteriaceae_86_Collinsella_83            |
| OTU_1377  | 7.07E-01 | 6.66E-01 | 1.84E-03 | 6.41  | 1.68 | Streptococcus_mitis_98             | Bacteria_Firmicutes_Bacilli_Lactobacillales_Streptococcaceae_Streptococcus_100                                  |
| OTU_4225  | 9.08E-01 | 7.20E-01 | 7.42E-02 | 3.21  | 5.00 | Pseudescherichia_vulneris_90       | Bacteria_Proteobacteria_62_Gammaproteobacteria_62_Enterobacterales_62_Enterobacteriaceae_61_Pseudescherichia_61 |
| OTU_1414  | 9.66E-01 | 6.04E-01 | 4.78E-01 | 4.08  | 3.47 | Clostridium_symbiosum_92           | Bacteria_Firmicutes_Clostridia_Clostridiales_Lachnospiraceae_53_Clostridium_XIVa_30                             |
| OTU_1799  | 7.07E-01 | 7.73E-01 | 5.76E-03 | 5.68  | 2.68 | Enterocloster_asparagiformis_95    | Bacteria_Firmicutes_Clostridia_Clostridiales_Lachnospiraceae_97_Enterocloster_76                                |
| OTU_368   | 7.07E-01 | 9.69E-01 | 1.14E-02 | 4.20  | 1.83 | Eubacterium_eligens_95             | Bacteria_Firmicutes_Clostridia_Clostridiales_Lachnospiraceae_Lachnospira_36                                     |
| OTU_1161  | 7.07E-01 | 6.04E-01 | 1.30E-02 | 5.43  | 1.83 | Pseudescherichia_vulneris_89       | Bacteria_Proteobacteria_75_Gammaproteobacteria_75_Enterobacterales_75_Enterobacteriaceae_75_Pseudescherichia_75 |
| OTU_436   | 7.10E-01 | 9.61E-01 | 1.87E-02 | 4.80  | 0.31 | Bifidobacterium_stercoris_91       | Bacteria_Actinobacteria_95_Actinobacteria_95_Bifidobacteriales_95_Bifidobacteriaceae_95_Pseudoscardovia_43      |
| OTU_13490 | 7.07E-01 | 9.62E-01 | 1.17E-02 | 6.62  | 0.81 | Bacteroides_stercoris_96           | Bacteria_Bacteroidetes_Bacteroidia_Bacteroidales_Bacteroidaceae_Bacteroides_90                                  |
| OTU_313   | 9.04E-01 | 6.04E-01 | 8.94E-01 | 3.16  | 2.95 | Acidaminococcus_intestini_93       | Bacteria_Firmicutes_Negativicutes_Acidaminococcales_98_Acidaminococcaceae_98_Acidaminococcus_98                 |
| OTU_3143  | 8.23E-01 | 8.16E-01 | 9.01E-02 | 4.23  | 2.70 | Dorea_longicatena_97               | Bacteria_Firmicutes_Clostridia_Clostridiales_Lachnospiraceae_Dorea_39                                           |
| OTU_4285  | 7.07E-01 | 7.97E-01 | 4.03E-03 | 9.26  | 0.77 | Bacteroides_stercoris_97           | Bacteria_Bacteroidetes_Bacteroidia_Bacteroidales_Bacteroidaceae_Bacteroides_99                                  |
| OTU_591   | 8.49E-01 | 6.50E-01 | 1.34E-02 | 8.47  | 1.39 | Clostridium_perfringens_98         | Bacteria_Firmicutes_94_Clostridia_94_Clostridiales_94_Clostridiaceae_1_93_Anaerobacter_36                       |

|           |          |          |          |      |      |                                   |                                                                                                                 |
|-----------|----------|----------|----------|------|------|-----------------------------------|-----------------------------------------------------------------------------------------------------------------|
| OTU_1495  | 7.07E-01 | 6.63E-01 | 7.53E-02 | 6.64 | 0.66 | Bacteroides_stercoris_96          | Bacteria_Bacteroidetes_Bacteroidia_Bacteroidales_Bacteroidaceae_Bacteroides_58                                  |
| OTU_8660  | 9.38E-01 | 9.32E-01 | 3.93E-02 | 3.18 | 5.49 | Pseudescherichia_vulneris_95      | Bacteria_Proteobacteria_Gammaproteobacteria_Enterobacterales_Enterobacteriaceae_Pseudescherichia_49             |
| OTU_9728  | 7.07E-01 | 6.05E-01 | 3.43E-06 | 7.57 | 1.41 | Bacteroides_xylanisolvans_97      | Bacteria_Bacteroidetes_Bacteroidia_Bacteroidales_Bacteroidaceae_Bacteroides_98                                  |
| OTU_1470  | 1.00E+00 | 8.08E-01 | 1.16E-02 | 2.02 | 4.67 | Vagococcus_humatus_90             | Bacteria_Firmicutes_Bacilli_76_Lactobacillales_76_Enterococcaceae_43_Melissococcus_34                           |
| OTU_79218 | 9.87E-01 | 9.61E-01 | 4.65E-01 | 5.14 | 4.35 | Roseburia_inulinivorans_87        | Bacteria_Proteobacteria_89_Gammaproteobacteria_89_Enterobacterales_89_Enterobacteriaceae_87_Pseudescherichia_67 |
| OTU_2919  | 8.57E-01 | 6.76E-01 | 9.47E-01 | 4.11 | 4.04 | Escherichia_albertii_89           | Bacteria_Firmicutes_64_Clostridia_64_Clostridiales_64_Lachnospiraceae_63_Extibacter_8                           |
| OTU_1721  | 7.07E-01 | 9.65E-01 | 5.84E-05 | 7.08 | 1.62 | Coprococcus_comes_97              | Bacteria_Firmicutes_Clostridia_Clostridiales_Lachnospiraceae_Coprococcus_42                                     |
| OTU_706   | 9.87E-01 | 9.34E-01 | 1.73E-02 | 7.41 | 1.67 | Merdimonas_faecis_92              | Bacteria_Firmicutes_Clostridia_Clostridiales_Lachnospiraceae_Clostridium_XIVa_49                                |
| OTU_1011  | 8.29E-01 | 6.04E-01 | 5.82E-01 | 3.70 | 2.78 | Parabacteroides_chongii_100       | Bacteria_Bacteroidetes_Bacteroidia_Bacteroidales_Porphyromonadaceae_Parabacteroides_100                         |
| OTU_728   | 7.07E-01 | 9.27E-01 | 1.62E-02 | 8.62 | 0.82 | Bacteroides_stercoris_98          | Bacteria_Bacteroidetes_77_Bacteroidia_77_Bacteroidales_77_Bacteroidaceae_77_Bacteroides_57                      |
| OTU_878   | 8.25E-01 | 6.06E-01 | 7.98E-01 | 3.50 | 3.27 | Hungatella_effluvii_96            | Bacteria_Firmicutes_Clostridia_Clostridiales_Lachnospiraceae_Clostridium_XIVa_39                                |
| OTU_493   | 8.25E-01 | 7.06E-01 | 1.40E-02 | 1.38 | 7.65 | Phocaeicola_plebeius_99           | Bacteria_Bacteroidetes_79_Bacteroidia_79_Bacteroidales_79_Bacteroidaceae_79_Phocaeicola_62                      |
| OTU_1503  | 7.46E-01 | 6.04E-01 | 5.74E-08 | 6.65 | 0.87 | Parabacteroides_distasonis_96     | Bacteria_Bacteroidetes_Bacteroidia_Bacteroidales_Porphyromonadaceae_96_Parabacteroides_96                       |
| OTU_1384  | 9.73E-01 | 9.90E-01 | 1.17E-03 | 2.03 | 4.71 | Bacteroides_fragilis_99           | Bacteria_Bacteroidetes_84_Bacteroidia_84_Bacteroidales_84_Bacteroidaceae_84_Bacteroides_63                      |
| OTU_4204  | 7.57E-01 | 8.23E-01 | 1.35E-02 | 7.11 | 0.96 | Bacteroides_stercoris_96          | Bacteria_Bacteroidetes_Bacteroidia_Bacteroidales_Bacteroidaceae_Bacteroides_96                                  |
| OTU_4716  | 8.79E-01 | 7.99E-01 | 9.16E-02 | 5.13 | 3.87 | Roseburia_inulinivorans_96        | Bacteria_Firmicutes_Clostridia_Clostridiales_Lachnospiraceae_Roseburia_53                                       |
| OTU_568   | 8.08E-01 | 9.82E-01 | 1.94E-02 | 7.67 | 0.45 | Parabacteroides_merdae_95         | Bacteria_Bacteroidetes_Bacteroidia_Bacteroidales_Porphyromonadaceae_Parabacteroides_100                         |
| OTU_31788 | 7.39E-01 | 6.04E-01 | 6.40E-02 | 3.22 | 5.23 | Bacteroides_thetaiotaomicron_99   | Bacteria_Bacteroidetes_Bacteroidia_Bacteroidales_Bacteroidaceae_Bacteroides_100                                 |
| OTU_374   | 7.07E-01 | 9.62E-01 | 1.12E-01 | 1.08 | 0.34 | Bifidobacterium_catenulatum_97    | Bacteria_Actinobacteria_Actinobacteria_Bifidobacteriales_Bifidobacteriaceae_Bifidobacterium_90                  |
| OTU_426   | 7.07E-01 | 9.25E-01 | 3.41E-02 | 4.98 | 0.53 | Prevotella_copri_97               | Bacteria_Bacteroidetes_Bacteroidia_Bacteroidales_Prevotellaceae_98_Prevotella_97                                |
| OTU_4953  | 8.82E-01 | 9.46E-01 | 3.96E-01 | 4.26 | 4.93 | Enterocloster_clostridioformis_97 | Bacteria_Firmicutes_Clostridia_Clostridiales_Lachnospiraceae_Enterocloster_61                                   |
| OTU_1592  | 7.07E-01 | 6.04E-01 | 1.18E-01 | 5.39 | 3.45 | Clostridium_perfringens_100       | Bacteria_Firmicutes_Clostridia_Clostridiales_Clostridiaceae_1_Clostridium_sensu_stricto_99                      |
| OTU_3818  | 7.80E-01 | 6.04E-01 | 1.72E-01 | 3.09 | 5.01 | Erysipelatoclostridium_amosum_96  | Bacteria_Firmicutes_Erysipelotrichia_Erysipelotrichales_Erysipelatoclostridiaceae_Erysipelatoclostridium_100    |
| OTU_3544  | 7.07E-01 | 7.44E-01 | 4.87E-05 | 7.64 | 1.31 | Bacteroides_uniformis_96          | Bacteria_Bacteroidetes_Bacteroidia_Bacteroidales_Bacteroidaceae_Bacteroides_100                                 |
| OTU_4291  | 1.00E+00 | 6.04E-01 | 6.48E-01 | 3.74 | 4.45 | Erysipelatoclostridium_amosum_97  | Bacteria_Firmicutes_Erysipelotrichia_Erysipelotrichales_Erysipelatoclostridiaceae_Erysipelatoclostridium_100    |
| OTU_1199  | 9.92E-01 | 9.69E-01 | 7.38E-02 | 5.67 | 3.13 | Clostridium_symbiosum_98          | Bacteria_Firmicutes_85_Clostridia_85_Clostridiales_85_Lachnospiraceae_85_Faecalimonas_21                        |
| OTU_24190 | 8.97E-01 | 8.14E-01 | 2.17E-01 | 3.34 | 4.06 | Enterocloster_citroniae_98        | Bacteria_Firmicutes_Clostridia_Clostridiales_Lachnospiraceae_Enterocloster_100                                  |
| OTU_4728  | 9.43E-01 | 9.20E-01 | 1.59E-03 | 1.68 | 5.01 | Escherichia_albertii_87           | Bacteria_Proteobacteria_60_Gammaproteobacteria_60_Enterobacterales_60_Enterobacteriaceae_60_Pseudescherichia_60 |
| OTU_1070  | 8.19E-01 | 6.04E-01 | 5.26E-02 | 2.21 | 4.77 | Enterocloster_citroniae_96        | Bacteria_Firmicutes_Clostridia_Clostridiales_Lachnospiraceae_Enterocloster_99                                   |
| OTU_13176 | 7.07E-01 | 9.18E-01 | 6.19E-03 | 7.40 | 1.87 | Bacteroides_xylanisolvans_98      | Bacteria_Bacteroidetes_Bacteroidia_Bacteroidales_Bacteroidaceae_Bacteroides_100                                 |
| OTU_3777  | 9.91E-01 | 6.04E-01 | 7.02E-01 | 4.06 | 4.39 | Pseudescherichia_vulneris_92      | Bacteria_Proteobacteria_65_Gammaproteobacteria_65_Enterobacterales_65_Enterobacteriaceae_65_Pseudescherichia_65 |
| OTU_3227  | 1.00E+00 | 9.29E-01 | 1.43E-01 | 4.99 | 3.44 | Escherichia_albertii_88           | Bacteria_Proteobacteria_59_Gammaproteobacteria_59_Enterobacterales_59_Enterobacteriaceae_59_Pseudescherichia_59 |
| OTU_34436 | 8.48E-01 | 7.99E-01 | 1.04E-03 | 1.26 | 5.11 | Enterococcus_faecalis_98          | Bacteria_Firmicutes_Bacilli_Lactobacillales_99_Enterococcaceae_98_Enterococcus_90                               |
| OTU_40765 | 9.31E-01 | 6.04E-01 | 7.49E-01 | 4.09 | 4.54 | Clostridium_symbiosum_95          | Bacteria_Firmicutes_Clostridia_Clostridiales_Lachnospiraceae_Clostridium_XIVa_90                                |
| OTU_555   | 8.82E-01 | 6.04E-01 | 6.88E-01 | 2.49 | 2.98 | Veillonella_dispar_94             | Bacteria_Firmicutes_Negativicutes_Veillonellales_97_Veillonellaceae_97_Veillonella_96                           |
| OTU_859   | 9.38E-01 | 9.92E-01 | 8.45E-02 | 0.17 | 0.56 | Phocaeicola_coprocola_96          | Bacteria_Bacteroidetes_Bacteroidia_Bacteroidales_Bacteroidaceae_Phocaeicola_100                                 |
| OTU_2556  | 9.52E-01 | 9.98E-01 | 2.13E-02 | 7.26 | 2.32 | Bacteroides_acidifaciens_99       | Bacteria_Bacteroidetes_Bacteroidia_Bacteroidales_Bacteroidaceae_Bacteroides_100                                 |
| OTU_9627  | 8.06E-01 | 6.63E-01 | 1.81E-03 | 6.00 | 1.97 | Hungatella_effluvii_94            | Bacteria_Firmicutes_Clostridia_Clostridiales_Lachnospiraceae_98_Hungatella_93                                   |
| OTU_9768  | 9.44E-01 | 8.71E-01 | 7.84E-01 | 3.49 | 3.73 | Kineothrix_alysoides_97           | Bacteria_Firmicutes_Clostridia_Clostridiales_Lachnospiraceae_Hungatella_65                                      |
| OTU_1364  | 7.07E-01 | 6.04E-01 | 1.75E-02 | 5.35 | 1.82 | Pseudescherichia_vulneris_95      | Bacteria_Proteobacteria_Gammaproteobacteria_Enterobacterales_Enterobacteriaceae_Pseudescherichia_62             |
| OTU_594   | 9.92E-01 | 6.62E-01 | 1.22E-03 | 5.25 | 2.00 | Phocaeicola_vulgatus_100          | Bacteria_Bacteroidetes_98_Bacteroidia_98_Bacteroidales_98_Bacteroidaceae_98_Phocaeicola_92                      |
| OTU_1731  | 7.45E-01 | 9.57E-01 | 2.06E-01 | 3.20 | 4.61 | Coprococcus_comes_95              | Bacteria_Firmicutes_Clostridia_Clostridiales_Lachnospiraceae_98_Coprococcus_49                                  |
| OTU_856   | 7.07E-01 | 6.04E-01 | 6.55E-02 | 6.03 | 0.37 | Bacteroides_stercoris_96          | Bacteria_Bacteroidetes_Bacteroidia_Bacteroidales_Bacteroidaceae_Bacteroides_62                                  |
| OTU_8148  | 8.85E-01 | 9.60E-01 | 5.46E-02 | 4.21 | 2.59 | Faecalimonas_umblicata_97         | Bacteria_Firmicutes_Clostridia_Clostridiales_Lachnospiraceae_Coprococcus_57                                     |
| OTU_6057  | 9.38E-01 | 7.80E-01 | 4.57E-06 | 6.49 | 1.79 | Bacteroides_faecis_97             | Bacteria_Bacteroidetes_Bacteroidia_Bacteroidales_Bacteroidaceae_Bacteroides_100                                 |
| OTU_214   | 7.07E-01 | 6.04E-01 | 9.16E-02 | 4.62 | 0.27 | Anaerotruncus_rubiinfantis_92     | Bacteria_Firmicutes_Clostridia_Clostridiales_Ruminococcaceae_Phocae_32                                          |
| OTU_1128  | 7.07E-01 | 6.52E-01 | 8.70E-01 | 3.44 | 3.24 | Pseudescherichia_vulneris_99      | Bacteria_Proteobacteria_Gammaproteobacteria_Enterobacterales_Enterobacteriaceae_Pseudescherichia_66             |
| OTU_17717 | 1.00E+00 | 9.83E-01 | 2.94E-04 | 1.90 | 5.30 | Gibbsiella_dentisursi_87          | Bacteria_Proteobacteria_96_Gammaproteobacteria_96_Enterobacterales_95_Enterobacteriaceae_95_Pseudescherichia_95 |
| OTU_1933  | 1.00E+00 | 8.02E-01 | 3.80E-01 | 3.12 | 3.79 | Escherichia_coli_97               | Bacteria_Proteobacteria_Gammaproteobacteria_Enterobacterales_Enterobacteriaceae_Escherichia/Shigella_85         |
| OTU_288   | 7.15E-01 | 9.92E-01 | 1.75E-02 | 1.46 | 8.38 | Ruminococcus_bromii_96            | Bacteria_Firmicutes_Clostridia_Clostridiales_Ruminococcaceae_98_Acutalibacter_51                                |
| OTU_700   | 9.38E-01 | 6.04E-01 | 2.09E-02 | 1.45 | 0.42 | Bacteroides_uniformis_92          | Bacteria_Bacteroidetes_Bacteroidia_Bacteroidales_Bacteroidaceae_94_Phocaeicola_86                               |
| OTU_298   | 7.07E-01 | 6.81E-01 | 6.95E-01 | 0.81 | 0.63 | Collinsella_aerofaciens_92        | Bacteria_Actinobacteria_96_Coriobacteriia_96_Coriobacteriales_96_Coriobacteriaceae_96_Collinsella_96            |
| OTU_1952  | 8.06E-01 | 6.62E-01 | 5.03E-01 | 4.94 | 4.07 | Enterococcus_faecalis_93          | Bacteria_Firmicutes_99_Bacilli_94_Lactobacillales_93_Carnobacteriaceae_56_Catelicoccus_33                       |
| OTU_3875  | 9.65E-01 | 7.95E-01 | 4.86E-01 | 4.02 | 3.53 | Clostridium_symbiosum_98          | Bacteria_Firmicutes_Clostridia_94_Clostridiales_94_Lachnospiraceae_93_Clostridium_XIVa_37                       |
| OTU_6002  | 9.92E-01 | 7.31E-01 | 2.13E-01 | 4.49 | 3.07 | Enterococcus_thailandicus_96      | Bacteria_Firmicutes_Bacilli_Lactobacillales_97_Enterococcaceae_81_Enterococcus_46                               |
| OTU_804   | 7.94E-01 | 6.04E-01 | 2.37E-02 | 8.83 | 0.33 | Clostridium_cadaveris_95          | Bacteria_Firmicutes_Clostridia_Clostridiales_Clostridiaceae_1_56_Proteioidaceae_33                              |
| OTU_11522 | 9.13E-01 | 6.04E-01 | 2.03E-01 | 4.20 | 3.04 | Clostridium_perfringens_97        | Bacteria_Firmicutes_Clostridia_Clostridiales_Clostridiaceae_1_92_Clostridium_sensu_stricto_63                   |
| OTU_187   | 9.76E-01 | 8.58E-01 | 7.86E-01 | 1.34 | 1.21 | Gracilibacter_thermotolerans_88   | Bacteria_Firmicutes_86_Negativicutes_29_Selenomonadales_29_Sporomusaceae_28_Dendrosporobacter_19                |
| OTU_477   | 7.88E-01 | 9.54E-01 | 1.71E-02 | 0.02 | 5.00 | Methylophilus_methylotrophus_97   | Bacteria_Proteobacteria_Betaproteobacteria_Nitrosomonadales_Methylophilaceae_Methylophilus_72                   |
| OTU_999   | 7.93E-01 | 6.04E-01 | 9.57E-02 | 3.84 | 2.12 | Veillonella_atypica_96            | Bacteria_Firmicutes_Negativicutes_Veillonellales_98_Veillonellaceae_98_Veillonella_98                           |
| OTU_1171  | 9.50E-01 | 9.34E-01 | 1.39E-02 | 6.31 | 1.30 | Bacteroides_nordii_86             | Bacteria_Firmicutes_56_Clostridia_56_Clostridiales_56_Lachnospiraceae_56_Merdimonas_35                          |
| OTU_149   | 7.07E-01 | 9.28E-01 | 1.25E-01 | 1.11 | 0.40 | Akkermansia_muciniphila_100       | Bacteria_Verrucomicrobia_Verrucomicrobiae_Verrucomicrobiales_Akkermansiaceae_Akkermansia_100                    |
| OTU_1535  | 9.01E-01 | 6.04E-01 | 6.57E-02 | 1.79 | 5.86 | Veillonella_tobetsuensis_96       | Bacteria_Firmicutes_Negativicutes_Veillonellales_Veillonellaceae_Veillonella_100                                |
| OTU_1330  | 9.65E-01 | 6.04E-01 | 6.16E-01 | 3.65 | 4.07 | Clostridium_scindens_96           | Bacteria_Firmicutes_Clostridia_Clostridiales_Lachnospiraceae_Clostridium_XIVa_93                                |
| OTU_717   | 8.16E-01 | 7.21E-01 | 2.71E-02 | 1.66 | 6.33 | Romboutsia_timonensis_90          | Bacteria_Bacteroidetes_62_Bacteroidia_62_Bacteroidales_62_Bacteroidaceae_62_Mediterranea_26                     |
| OTU_10008 | 8.67E-01 | 6.59E-01 | 5.06E-01 | 4.48 | 3.94 | Pseudescherichia_vulneris_96      | Bacteria_Proteobacteria_78_Gammaproteobacteria_78_Enterobacterales_78_Enterobacteriaceae_78_Pseudescherichia_62 |
| OTU_345   | 7.59E-01 | 6.04E-01 | 3.60E-01 | 1.04 | 4.06 | Bacteroides_faecis_96             | Bacteria_Bacteroidetes_Bacteroidia_Bacteroidales_Bacteroidaceae_Bacteroides_79                                  |



|            |          |          |          |       |      |                                     |                                                                                                                 |
|------------|----------|----------|----------|-------|------|-------------------------------------|-----------------------------------------------------------------------------------------------------------------|
| OTU_3619   | 9.60E-01 | 9.97E-01 | 8.56E-01 | 3.65  | 3.85 | Enterococcus_thailandicus_92        | Bacteria_Firmicutes_Bacilli_86_Lactobacillales_85_Carnobacteriaceae_38_Catelicoccus_19                          |
| OTU_414    | 7.14E-01 | 7.11E-01 | 2.43E-02 | 7.83  | 0.30 | Fusobacterium_mortiferum_89         | Bacteria_Fusobacteria_96_Fusobacterii_96_Fusobacteriales_96_Fusobacteriaceae_95_Cetobacterium_69                |
| OTU_59405  | 9.45E-01 | 6.47E-01 | 9.49E-02 | 2.60  | 5.00 | Clostridium_symbiosum_95            | Bacteria_Firmicutes_Clostridia_Clostridiales_Lachnospiraceae_Clostridium_XIVa_69                                |
| OTU_7328   | 9.32E-01 | 9.25E-01 | 9.96E-03 | 3.30  | 5.39 | Pseudescherichia_vulneris_99        | Bacteria_Proteobacteria_98_Gammaproteobacteria_98_Enterobacterales_98_Enterobacteriaceae_98_Pseudescherichia_93 |
| OTU_7520   | 9.38E-01 | 8.97E-01 | 1.85E-01 | 3.38  | 4.48 | Pseudescherichia_vulneris_95        | Bacteria_Proteobacteria_Gammaproteobacteria_Enterobacterales_Enterobacteriaceae_Pseudescherichia_68             |
| OTU_218    | 9.37E-01 | 6.10E-01 | 4.59E-02 | 7.74  | 0.23 | Phocaeicola_barnesiae_88            | Bacteria_Bacteroidetes_Bacteroidia_Bacteroidales_Prevotellaceae_86_Paraprevotella_86                            |
| OTU_658    | 8.67E-01 | 9.32E-01 | 7.87E-03 | 1.50  | 5.39 | Phascolarctobacterium_faecium_96    | Bacteria_Firmicutes_Negativicutes_Acidaminococcales_Acidaminococcaceae_Phascolarctobacterium_100                |
| OTU_103815 | 7.07E-01 | 6.04E-01 | 3.10E-01 | 3.93  | 0.14 | Veillonella_rogosae_98              | Bacteria_Firmicutes_Negativicutes_Veillonellales_Veillonellaceae_Veillonella_100                                |
| OTU_976    | 8.19E-01 | 6.05E-01 | 2.07E-02 | 7.00  | 0.71 | Petrocella_atlantisensis_88         | Bacteria_Firmicutes_99_Clostridia_99_Clostridiales_99_Lachnospiraceae_39_Robinsoniella_29                       |
| OTU_2260   | 9.31E-01 | 8.14E-01 | 2.71E-01 | 3.64  | 2.64 | Sellimonas_intestinalis_96          | Bacteria_Firmicutes_Clostridia_Clostridiales_Lachnospiraceae_Sellimonas_74                                      |
| OTU_1662   | 8.79E-01 | 9.25E-01 | 6.41E-02 | 4.24  | 2.69 | Coprococcus_comes_97                | Bacteria_Firmicutes_Clostridia_Clostridiales_Lachnospiraceae_Coprococcus_43                                     |
| OTU_377    | 8.82E-01 | 9.04E-01 | 6.14E-02 | 2.35  | 0.75 | Actinobacillus_delphinicola_95      | Bacteria_Proteobacteria_Gammaproteobacteria_Pasteurellales_92_Pasteurellaceae_92_Conservatibacter_27            |
| OTU_1431   | 9.43E-01 | 6.04E-01 | 4.44E-03 | 7.26  | 1.05 | Clostridium_perfringens_94          | Bacteria_Firmicutes_Clostridia_Clostridiales_Clostridiaceae_1_42_Sarcina_21                                     |
| OTU_160    | 7.85E-01 | 6.66E-01 | 8.45E-02 | 6.04  | 0.11 | Eubacterium_eligens_96              | Bacteria_Firmicutes_Clostridia_Clostridiales_Lachnospiraceae_Lachnospira_47                                     |
| OTU_10716  | 7.22E-01 | 8.36E-01 | 6.96E-01 | 2.98  | 3.20 | Pseudescherichia_vulneris_96        | Bacteria_Proteobacteria_Gammaproteobacteria_Enterobacterales_Enterobacteriaceae_Escherichia/Shigella_55         |
| OTU_230    | 9.08E-01 | 6.04E-01 | 4.10E-02 | 5.43  | 0.12 | Muribaculum_intestinale_88          | Bacteria_Bacteroidetes_Bacteroidia_Bacteroidales_Muribaculaceae_97_Duncaniella_40                               |
| OTU_203    | 9.66E-01 | 6.47E-01 | 4.96E-02 | 0.54  | 0.14 | Megasphaera_elsdenii_92             | Bacteria_Firmicutes_Negativicutes_93_Veillonellales_93_Veillonellaceae_93_Megasphaera_93                        |
| OTU_1040   | 7.07E-01 | 6.04E-01 | 2.23E-01 | 4.26  | 0.44 | Streptococcus_salivarius_89         | Bacteria_Firmicutes_Bacilli_88_Lactobacillales_73_Enterococcaceae_21_Bavariicoccus_10                           |
| OTU_1210   | 7.75E-01 | 8.70E-01 | 3.73E-01 | 1.78  | 2.49 | Enterocloster_clostridioformis_94   | Bacteria_Firmicutes_Clostridia_86_Clostridiales_86_Lachnospiraceae_84_Fusicatenibacter_19                       |
| OTU_13837  | 9.92E-01 | 9.70E-01 | 3.74E-02 | 4.79  | 3.07 | Ruminococcus_faecis_96              | Bacteria_Firmicutes_Clostridia_Clostridiales_Lachnospiraceae_Coprococcus_79                                     |
| OTU_238    | NA       | 7.99E-01 | 7.27E-02 | 0.00  | 5.42 | Azospirillum_soli_98                | Bacteria_Proteobacteria_Alphaproteobacteria_Rhodospirillales_Azospirillaceae_Azospirillum_99                    |
| OTU_98414  | 9.99E-01 | 7.97E-01 | 7.49E-03 | 1.61  | 4.21 | Pseudescherichia_vulneris_89        | Bacteria_Proteobacteria_50_Gammaproteobacteria_50_Enterobacterales_50_Enterobacteriaceae_47_Pseudescherichia_47 |
| OTU_1145   | 9.78E-01 | 8.79E-01 | 8.84E-01 | 3.49  | 3.65 | Pseudescherichia_vulneris_91        | Bacteria_Proteobacteria_60_Gammaproteobacteria_60_Enterobacterales_60_Enterobacteriaceae_60_Pseudescherichia_59 |
| OTU_367    | 9.92E-01 | 6.04E-01 | 6.92E-02 | 10.18 | 1.07 | Allobaculum_stercoricanis_94        | Bacteria_Firmicutes_Erysipelotrichia_Erysipelotrichales_Erysipelotrichaceae_Allobaculum_91                      |
| OTU_452    | 7.07E-01 | 9.32E-01 | 1.98E-01 | 7.02  | 0.28 | Bifidobacterium_rousetti_90         | Bacteria_Actinobacteria_81_Actinobacteria_81_Bifidobacteriales_81_Bifidobacteriaceae_81_Pseudoscardovia_44      |
| OTU_1190   | 7.07E-01 | 6.04E-01 | 2.21E-01 | 3.70  | 2.58 | Enterocloster_clostridioformis_94   | Bacteria_Firmicutes_Clostridia_Clostridiales_Lachnospiraceae_Enterocloster_94                                   |
| OTU_2021   | 9.06E-01 | 6.04E-01 | 5.22E-02 | 3.96  | 2.19 | Clostridium_carnis_90               | Bacteria_Firmicutes_97_Bacilli_82_Lactobacillales_65_Carnobacteriaceae_61_Isobaculum_56                         |
| OTU_3095   | 9.08E-01 | 6.06E-01 | 1.07E-01 | 2.70  | 3.82 | Paraclostridium_benzoelyticum_97    | Bacteria_Firmicutes_Clostridia_Clostridiales_Peptostreptococcaceae_Paraclostridium_89                           |
| OTU_4681   | 9.64E-01 | 7.97E-01 | 6.95E-01 | 3.19  | 3.52 | Morganella_morganii_86              | Bacteria_Proteobacteria_87_Gammaproteobacteria_87_Enterobacterales_86_Enterobacteriaceae_85_Pseudescherichia_84 |
| OTU_515    | 7.07E-01 | 7.80E-01 | 3.93E-02 | 1.15  | 2.54 | Anaerofilum_pentosovorans_90        | Bacteria_Firmicutes_Clostridia_Clostridiales_Lachnospiraceae_49_Catonella_40                                    |
| OTU_66750  | 7.57E-01 | 6.04E-01 | 2.64E-02 | 5.61  | 1.25 | Bacteroides_kribbi_97               | Bacteria_Bacteroidetes_Bacteroidia_Bacteroidales_Bacteroidaceae_Bacteroides_100                                 |
| OTU_10340  | 8.85E-01 | 7.75E-01 | 1.32E-02 | 2.40  | 5.30 | Pseudescherichia_vulneris_96        | Bacteria_Proteobacteria_93_Gammaproteobacteria_93_Enterobacterales_92_Enterobacteriaceae_91_Pseudescherichia_90 |
| OTU_1485   | 7.07E-01 | 6.04E-01 | 4.81E-07 | 6.66  | 1.78 | Bacteroides_uniformis_95            | Bacteria_Bacteroidetes_Bacteroidia_Bacteroidales_Bacteroidaceae_Bacteroides_76                                  |
| OTU_666    | 7.14E-01 | 6.04E-01 | 3.77E-02 | 4.56  | 2.53 | Peptoniphilus_grossensis_95         | Bacteria_Firmicutes_Clostridia_Clostridiales_Peptoniphilaceae_Peptoniphilus_100                                 |
| OTU_293    | 9.98E-01 | 6.55E-01 | 1.69E-01 | 0.55  | 0.20 | Catenibacterium_mitsuokai_91        | Bacteria_Firmicutes_Erysipelotrichia_Erysipelotrichales_Erysipelotrichaceae_Catenibacterium_69                  |
| OTU_659    | 7.75E-01 | 8.36E-01 | 8.76E-02 | 1.77  | 0.86 | Bifidobacterium_saguini_94          | Bacteria_Actinobacteria_93_Actinobacteria_93_Bifidobacteriales_93_Bifidobacteriaceae_93_Bifidobacterium_56      |
| OTU_210    | 8.06E-01 | 6.04E-01 | 4.02E-02 | 4.91  | 0.45 | Faecalicatena_fissicatena_98        | Bacteria_Firmicutes_Clostridia_Clostridiales_Lachnospiraceae_Faecalicatena_65                                   |
| OTU_8462   | 8.79E-01 | 9.00E-01 | 9.21E-02 | 3.01  | 4.40 | Paraclostridium_benzoelyticum_97    | Bacteria_Firmicutes_Clostridia_Clostridiales_Peptostreptococcaceae_Paraclostridium_100                          |
| OTU_33827  | 7.07E-01 | 6.04E-01 | 5.10E-03 | 1.82  | 4.26 | Enterococcus_faecalis_98            | Bacteria_Firmicutes_Bacilli_Lactobacillales_Enterococcaceae_Enterococcus_93                                     |
| OTU_84744  | 7.07E-01 | 7.81E-01 | 5.91E-02 | 7.14  | 0.90 | Bacteroides_stercoris_96            | Bacteria_Bacteroidetes_Bacteroidia_Bacteroidales_Bacteroidaceae_Bacteroides_100                                 |
| OTU_439    | 7.07E-01 | 7.73E-01 | 5.03E-02 | 6.13  | 1.79 | Escherichia_coli_88                 | Bacteria_Proteobacteria_70_Gammaproteobacteria_70_Enterobacterales_70_Enterobacteriaceae_70_Pseudescherichia_70 |
| OTU_2124   | 9.87E-01 | 7.11E-01 | 1.04E-02 | 1.95  | 4.06 | Shigella_dysenteriae_91             | Bacteria_Proteobacteria_97_Gammaproteobacteria_97_Enterobacterales_97_Enterobacteriaceae_95_Pseudescherichia_93 |
| OTU_497    | 7.81E-01 | 9.90E-01 | 6.50E-02 | 7.03  | 0.15 | Blautia_faecicola_98                | Bacteria_Firmicutes_Clostridia_Clostridiales_Lachnospiraceae_Mediterraneibacter_65                              |
| OTU_3647   | 8.25E-01 | 9.53E-01 | 7.68E-01 | 3.31  | 3.06 | Falcatimonas_natans_93              | Bacteria_Firmicutes_Clostridia_86_Clostridiales_86_Lachnospiraceae_85_Falcatimonas_25                           |
| OTU_2749   | 7.07E-01 | 9.17E-01 | 1.97E-02 | 1.26  | 0.43 | Bacteroides_caecimuris_96           | Bacteria_Bacteroidetes_Bacteroidia_Bacteroidales_Bacteroidaceae_Bacteroides_100                                 |
| OTU_347    | 9.38E-01 | 6.61E-01 | 9.61E-01 | 1.91  | 1.87 | Agathobaculum_butyriciproducens_100 | Bacteria_Firmicutes_Clostridia_Clostridiales_Ruminococcaceae_Agathobaculum_75                                   |
| OTU_254    | 9.38E-01 | 6.04E-01 | 4.52E-02 | 8.04  | 0.34 | Faecalibaculum_rodentium_89         | Bacteria_Firmicutes_Erysipelotrichia_Erysipelotrichales_Erysipelotrichaceae_Allobaculum_80                      |
| OTU_534    | 7.46E-01 | 6.05E-01 | 3.34E-02 | 1.00  | 4.51 | Pseudescherichia_vulneris_92        | Bacteria_Proteobacteria_90_Gammaproteobacteria_90_Enterobacterales_90_Enterobacteriaceae_90_Pseudescherichia_89 |
| OTU_557    | 8.16E-01 | 6.04E-01 | 9.33E-02 | 4.82  | 1.51 | Escherichia_coli_89                 | Bacteria_Proteobacteria_61_Gammaproteobacteria_61_Enterobacterales_61_Enterobacteriaceae_59_Pseudescherichia_59 |
| OTU_420    | 8.60E-01 | 6.04E-01 | 3.60E-01 | 1.88  | 4.59 | Erysipelatoclostridium_ramosum_97   | Bacteria_Firmicutes_Erysipelotrichia_Erysipelotrichales_Erysipelatoclostridiaceae_Erysipelatoclostridium_100    |
| OTU_538    | 7.07E-01 | 8.59E-01 | 2.47E-02 | 1.77  | 0.36 | Bifidobacterium_stercoris_97        | Bacteria_Actinobacteria_Actinobacteria_Bifidobacteriales_Bifidobacteriaceae_Bifidobacterium_96                  |
| OTU_2017   | 7.07E-01 | 7.68E-01 | 9.96E-06 | 7.59  | 0.59 | Bacteroides_uniformis_96            | Bacteria_Bacteroidetes_Bacteroidia_Bacteroidales_Bacteroidaceae_Bacteroides_98                                  |
| OTU_265    | 7.59E-01 | 6.04E-01 | 6.15E-01 | 2.59  | 4.94 | Bacteroides_fragilis_96             | Bacteria_Bacteroidetes_66_Bacteroidia_66_Bacteroidales_66_Bacteroidaceae_66_Mediterranea_34                     |
| OTU_287    | 9.04E-01 | 8.83E-01 | 1.33E-01 | 6.51  | 0.17 | Blautia_caecimuris_97               | Bacteria_Firmicutes_Clostridia_Clostridiales_Lachnospiraceae_Blautia_46                                         |
| OTU_13344  | 7.07E-01 | 6.04E-01 | 5.99E-02 | 4.26  | 2.17 | Bacteroides_stercoris_97            | Bacteria_Bacteroidetes_Bacteroidia_Bacteroidales_Bacteroidaceae_Bacteroides_100                                 |
| OTU_1033   | 8.89E-01 | 6.04E-01 | 4.89E-01 | 3.70  | 3.07 | Bacteroides_thetaiotaomicron_100    | Bacteria_Bacteroidetes_98_Bacteroidia_98_Bacteroidales_98_Bacteroidaceae_97_Bacteroides_67                      |
| OTU_561    | 7.07E-01 | 8.53E-01 | 3.22E-02 | 0.98  | 4.63 | Clostridium_tepidum_97              | Bacteria_Proteobacteria_65_Gammaproteobacteria_65_Enterobacterales_65_Enterobacteriaceae_65_Pseudescherichia_62 |
| OTU_1146   | 7.07E-01 | 6.27E-01 | 2.91E-02 | 1.17  | 4.47 | Eubacterium_limosum_92              | Bacteria_Firmicutes_Clostridia_Clostridiales_Eubacteriaceae_77_Eubacterium_67                                   |
| OTU_504    | 7.12E-01 | 6.04E-01 | 1.96E-01 | 4.91  | 2.02 | Fusobacterium_perfoetens_86         | Bacteria_Proteobacteria_52_Gammaproteobacteria_52_Enterobacterales_52_Enterobacteriaceae_51_Pseudescherichia_48 |
| OTU_7854   | 8.25E-01 | 8.83E-01 | 1.10E-01 | 2.03  | 1.26 | Bacteroides_caccae_98               | Bacteria_Bacteroidetes_Bacteroidia_Bacteroidales_Bacteroidaceae_Bacteroides_100                                 |
| OTU_1469   | 7.85E-01 | 9.73E-01 | 2.20E-02 | 2.13  | 5.41 | Veillonella_dispar_97               | Bacteria_Firmicutes_43_Negativicutes_40_Selenomonadales_28_Sporomusaceae_27_Anaerosinus_22                      |
| OTU_4485   | 9.75E-01 | 6.51E-01 | 3.30E-01 | 2.75  | 4.16 | Kineothrix_allysoides_96            | Bacteria_Firmicutes_Clostridia_Clostridiales_Lachnospiraceae_Coprococcus_75                                     |
| OTU_1056   | 9.99E-01 | 6.04E-01 | 1.84E-01 | 0.48  | 3.35 | Phocaeicola_coprocola_96            | Bacteria_Bacteroidetes_Bacteroidia_Bacteroidales_Bacteroidaceae_Bacteroides_75                                  |
| OTU_1659   | 9.67E-01 | 6.04E-01 | 5.66E-05 | 3.62  | 0.64 | Phocaeicola_vulgatus_97             | Bacteria_Bacteroidetes_Bacteroidia_Bacteroidales_Bacteroidaceae_Phocaeicola_100                                 |
| OTU_412    | 7.07E-01 | 9.49E-01 | 3.18E-02 | 1.51  | 4.08 | Enterococcus_dispar_99              | Bacteria_Firmicutes_Bacilli_95_Lactobacillales_91_Carnobacteriaceae_60_Isobaculum_56                            |
| OTU_429    | 9.43E-01 | 9.75E-01 | 8.51E-01 | 0.88  | 1.02 | Catenibacterium_mitsuokai_94        | Bacteria_Firmicutes_Erysipelotrichia_Erysipelotrichales_Erysipelotrichaceae_Catenibacterium_100                 |
| OTU_540    | 9.87E-01 | 6.76E-01 | 2.40E-01 | 1.33  | 0.79 | Lachnospira_pectinoshiza_98         | Bacteria_Firmicutes_Clostridia_Clostridiales_Lachnospiraceae_Lachnospira_95                                     |

|           |          |          |          |      |      |                                     |                                                                                                                      |
|-----------|----------|----------|----------|------|------|-------------------------------------|----------------------------------------------------------------------------------------------------------------------|
| OTU_6539  | 7.07E-01 | 8.28E-01 | 2.15E-01 | 3.29 | 2.54 | Pseudescherichia_vulneris_97        | Bacteria_Proteobacteria_Gammaproteobacteria_Enterobacterales_Enterobacteriaceae_99_Escherichia/Shigella_57           |
| OTU_2133  | 7.94E-01 | 6.50E-01 | 3.50E-04 | 1.56 | 4.64 | Escherichia_albertii_89             | Bacteria_Proteobacteria_72_Gammaproteobacteria_72_Enterobacterales_72_Enterobacteriaceae_72_Pseudescherichia_72      |
| OTU_774   | 8.85E-01 | 6.04E-01 | 7.38E-02 | 3.63 | 1.83 | Peptoniphilus_grossensis_98         | Bacteria_Firmicutes_Clostridia_82_Clostridiales_82_Peptoniphilaceae_80_Peptoniphilus_80                              |
| OTU_22518 | 9.14E-01 | 9.98E-01 | 7.84E-01 | 3.38 | 3.58 | Pseudescherichia_vulneris_97        | Bacteria_Proteobacteria_83_Gammaproteobacteria_83_Enterobacterales_83_Enterobacteriaceae_83_Pseudescherichia_71      |
| OTU_560   | 8.57E-01 | 6.81E-01 | 1.95E-02 | 0.84 | 4.81 | Clostridium_tepidum_96              | Bacteria_Firmicutes_99_Clostridia_99_Clostridiales_99_Clostridiaceae_1_98_Clostridium_sensu_stricto_63               |
| OTU_703   | 8.25E-01 | 6.04E-01 | 3.76E-01 | 2.46 | 3.92 | Clostridium_symbiosum_96            | Bacteria_Firmicutes_Erysipelotrichia_54_Erysipelotrichales_54_Erysipelatoclostridiaceae_54_Erysipelatoclostridium_54 |
| OTU_818   | 7.07E-01 | 6.04E-01 | 9.87E-03 | 6.28 | 1.01 | Bifidobacterium_stercoris_99        | Bacteria_Actinobacteria_89_Actinobacteria_89_Bifidobacteriales_89_Bifidobacteriaceae_89_Pseudoscardovia_50           |
| OTU_11814 | 8.97E-01 | 8.64E-01 | 2.48E-01 | 2.66 | 3.29 | Shigella_dysenteriae_91             | Bacteria_Proteobacteria_77_Gammaproteobacteria_77_Enterobacterales_77_Enterobacteriaceae_76_Pseudescherichia_76      |
| OTU_319   | 8.06E-01 | 6.50E-01 | 5.40E-01 | 0.39 | 0.52 | Enterocloster_citroniae_89          | Bacteria_Firmicutes_98_Clostridia_98_Clostridiales_98_Lachnospiraceae_97_Merdimonas_7                                |
| OTU_508   | 7.74E-01 | 6.04E-01 | 1.18E-02 | 3.07 | 0.49 | Sutterella_wadsworthensis_91        | Bacteria_Proteobacteria_99_Betaproteobacteria_99_Burkholderiales_99_Sutterellaceae_99_Sutterella_96                  |
| OTU_16362 | 7.46E-01 | 6.04E-01 | 1.45E-02 | 4.21 | 0.89 | Bacteroides_caccae_98               | Bacteria_Bacteroidetes_Bacteroidia_Bacteroidales_Bacteroidaceae_Bacteroides_100                                      |
| OTU_1037  | 7.57E-01 | 6.10E-01 | 3.38E-03 | 1.14 | 4.00 | Flavonifractor_plautii_98           | Bacteria_Firmicutes_Clostridia_99_Clostridiales_99_Ruminococcaceae_99_Flavonifractor_99                              |
| OTU_1771  | 7.07E-01 | 8.09E-01 | 1.83E-02 | 3.89 | 1.33 | Bifidobacterium_saguini_93          | Bacteria_Actinobacteria_91_Actinobacteria_91_Bifidobacteriales_91_Bifidobacteriaceae_91_Pseudoscardovia_38           |
| OTU_793   | NA       | 6.88E-01 | 9.49E-02 | 0.00 | 5.85 | Rosenbergiella_epipactidis_92       | Bacteria_Proteobacteria_Gammaproteobacteria_76_Enterobacterales_75_Enterobacteriaceae_75_Pseudescherichia_62         |
| OTU_861   | 7.07E-01 | 9.34E-01 | 7.23E-01 | 0.22 | 0.28 | Bifidobacterium_callitrichidarum_91 | Bacteria_Actinobacteria_94_Actinobacteria_94_Bifidobacteriales_94_Bifidobacteriaceae_94_Bifidobacterium_45           |
| OTU_9754  | 9.00E-01 | 6.48E-01 | 6.33E-04 | 5.03 | 1.60 | Pseudescherichia_vulneris_97        | Bacteria_Proteobacteria_86_Gammaproteobacteria_86_Enterobacterales_86_Enterobacteriaceae_85_Pseudescherichia_70      |
| OTU_15028 | 8.06E-01 | 6.04E-01 | 8.69E-02 | 5.18 | 2.70 | Coprococcus_comes_97                | Bacteria_Firmicutes_Clostridia_Clostridiales_Lachnospiraceae_Bariatricus_72                                          |
| OTU_261   | 9.78E-01 | 6.04E-01 | 5.20E-02 | 6.82 | 0.24 | Rhabdanaerobium_thermarum_87        | Bacteria_Firmicutes_88_Clostridia_70_Clostridiales_69_Catabacteriaceae_12_Catabacter_12                              |
| OTU_4831  | 9.31E-01 | 7.26E-01 | 8.05E-02 | 2.25 | 3.34 | Stomatobaculum_longum_88            | Bacteria_Proteobacteria_74_Gammaproteobacteria_74_Enterobacterales_74_Enterobacteriaceae_74_Pseudescherichia_74      |
| OTU_1187  | 7.07E-01 | 6.04E-01 | 5.39E-01 | 1.65 | 3.70 | Flintibacter_butyricus_97           | Bacteria_Firmicutes_Clostridia_Clostridiales_Ruminococcaceae_Flintibacter_70                                         |
| OTU_2973  | 9.38E-01 | 9.25E-01 | 2.50E-01 | 2.85 | 4.07 | Hungatella_hathewayi_96             | Bacteria_Firmicutes_Clostridia_Clostridiales_Lachnospiraceae_99_Hungatella_94                                        |
| OTU_655   | 7.85E-01 | 8.64E-01 | 4.51E-03 | 0.56 | 6.25 | Bacteroides_fragilis_100            | Bacteria_Bacteroidetes_61_Bacteroidia_61_Bacteroidales_61_Bacteroidaceae_61_Mediterranea_30                          |
| OTU_1481  | 7.75E-01 | 7.20E-01 | 2.64E-02 | 5.10 | 1.00 | Enterococcus_pallens_96             | Bacteria_Firmicutes_Bacilli_Lactobacillales_Enterococcaceae_90_Melissococcus_55                                      |
| OTU_4692  | 9.93E-01 | 8.85E-01 | 1.63E-02 | 3.84 | 2.37 | Enterocloster_clostridioformis_97   | Bacteria_Firmicutes_Clostridia_Clostridiales_Lachnospiraceae_Enterocloster_93                                        |
| OTU_470   | 7.57E-01 | 9.21E-01 | 1.46E-02 | 0.50 | 5.68 | Bacteroides_fragilis_100            | Bacteria_Bacteroidetes_99_Bacteroidia_99_Bacteroidales_99_Bacteroidaceae_93_Bacteroides_54                           |
| OTU_813   | 7.84E-01 | 6.04E-01 | 2.74E-02 | 4.94 | 1.40 | Sutterella_wadsworthensis_97        | Bacteria_Proteobacteria_Betaproteobacteria_Burkholderiales_Sutterellaceae_Sutterella_100                             |
| OTU_952   | 9.65E-01 | 9.41E-01 | 6.25E-02 | 4.41 | 2.53 | Veillonella_dispar_99               | Bacteria_Firmicutes_59_Negativicutes_59_Selenomonadales_22_Sporomusaceae_22_Anaerosinus_16                           |
| OTU_3743  | 8.97E-01 | 7.46E-01 | 4.28E-01 | 2.82 | 3.35 | Enterococcus_faecalis_94            | Bacteria_Firmicutes_99_Bacilli_99_Lactobacillales_98_Carnobacteriaceae_56_Isobaculum_33                              |
| OTU_10607 | 9.52E-01 | 6.04E-01 | 1.72E-02 | 1.84 | 3.18 | Enterococcus_faecalis_97            | Bacteria_Firmicutes_Bacilli_Lactobacillales_Enterococcaceae_91_Enterococcus_81                                       |
| OTU_866   | 9.14E-01 | 6.04E-01 | 8.81E-01 | 3.21 | 3.04 | Pseudescherichia_vulneris_99        | Bacteria_Proteobacteria_82_Gammaproteobacteria_82_Enterobacterales_82_Enterobacteriaceae_81_Pseudescherichia_68      |
| OTU_1703  | 7.07E-01 | 7.61E-01 | 3.73E-01 | 3.24 | 2.52 | Dorea_longicatena_97                | Bacteria_Firmicutes_Clostridia_Clostridiales_Lachnospiraceae_Dorea_100                                               |
| OTU_1813  | 7.07E-01 | 6.04E-01 | 1.66E-01 | 2.63 | 1.66 | Collinsella_aerofaciens_96          | Bacteria_Actinobacteria_Coriobacteriia_Coriobacteriales_99_Coriobacteriaceae_99_Collinsella_98                       |
| OTU_308   | 7.91E-01 | 8.14E-01 | 4.91E-01 | 0.44 | 0.28 | Catenibacterium_mitsuokai_97        | Bacteria_Firmicutes_99_Erysipelotrichia_99_Erysipelotrichales_99_Erysipelotrichaceae_99_Catenibacterium_71           |
| OTU_820   | 7.46E-01 | 9.61E-01 | 4.72E-04 | 5.11 | 0.66 | Streptococcus_mitis_96              | Bacteria_Firmicutes_Bacilli_Lactobacillales_Streptococcaceae_Streptococcus_99                                        |
| OTU_450   | 7.57E-01 | 7.70E-01 | 1.92E-02 | 4.20 | 0.25 | Prevotella_copri_96                 | Bacteria_Bacteroidetes_Bacteroidia_Bacteroidales_Prevotellaceae_88_Prevotella_88                                     |
| OTU_67345 | 9.01E-01 | 9.34E-01 | 6.26E-01 | 2.16 | 2.45 | Enterococcus_faecalis_98            | Bacteria_Firmicutes_Bacilli_Lactobacillales_Enterococcaceae_Enterococcus_82                                          |
| OTU_3679  | 8.74E-01 | 6.49E-01 | 1.66E-02 | 3.49 | 1.74 | Veillonella_dispar_98               | Bacteria_Firmicutes_Negativicutes_55_Veillonellales_50_Veillonellaceae_50_Veillonella_49                             |
| OTU_1505  | 7.46E-01 | 9.75E-01 | 6.04E-03 | 1.57 | 3.98 | Gibbsiella_greigii_92               | Bacteria_Proteobacteria_Gammaproteobacteria_Enterobacterales_Enterobacteriaceae_Pseudescherichia_41                  |
| OTU_283   | 8.57E-01 | 9.38E-01 | 6.83E-01 | 1.00 | 0.80 | Eubacterium_eligens_100             | Bacteria_Firmicutes_Clostridia_Clostridiales_Lachnospiraceae_Lachnospira_100                                         |
| OTU_483   | 7.07E-01 | 6.04E-01 | 2.72E-01 | 5.05 | 2.08 | Enterococcus_asini_87               | Bacteria_Fusobacteria_77_Fusobacteriia_77_Fusobacteriales_77_Fusobacteriaceae_75_Cetobacterium_45                    |
| OTU_761   | 9.43E-01 | 9.70E-01 | 1.60E-02 | 1.19 | 4.63 | Bacteroides_fragilis_89             | Bacteria_Proteobacteria_80_Gammaproteobacteria_80_Enterobacterales_80_Enterobacteriaceae_80_Pseudescherichia_80      |
| OTU_449   | 7.07E-01 | 6.04E-01 | 3.96E-01 | 1.43 | 0.73 | Collinsella_aerofaciens_99          | Bacteria_Actinobacteria_79_Coriobacteriia_79_Coriobacteriales_78_Coriobacteriaceae_74_Collinsella_73                 |
| OTU_686   | 7.87E-01 | 6.04E-01 | 8.02E-02 | 4.94 | 1.09 | Intestinimonas_butyriciproducens_95 | Bacteria_Firmicutes_Clostridia_Clostridiales_Ruminococcaceae_Intestinimonas_86                                       |
| OTU_1446  | 8.83E-01 | 6.04E-01 | 1.82E-03 | 4.31 | 1.05 | Clostridium_perfringens_92          | Bacteria_Firmicutes_Clostridia_96_Clostridiales_96_Clostridiaceae_1_96_Sarcina_47                                    |
| OTU_4533  | 8.16E-01 | 9.94E-01 | 3.15E-03 | 1.93 | 3.40 | Flavonifractor_plautii_97           | Bacteria_Firmicutes_Clostridia_Clostridiales_Ruminococcaceae_Flavonifractor_100                                      |
| OTU_908   | 7.07E-01 | 6.04E-01 | 9.17E-01 | 1.61 | 1.51 | Senegalimassilia_anaerobia_96       | Bacteria_Actinobacteria_Coriobacteriia_Coriobacteriales_97_Coriobacteriaceae_97_Senegalimassilia_94                  |
| OTU_2037  | 7.46E-01 | 8.28E-01 | 2.10E-01 | 3.37 | 2.07 | Bacteroides_fragilis_96             | Bacteria_Bacteroidetes_Bacteroidia_Bacteroidales_Bacteroidaceae_Bacteroides_100                                      |
| OTU_23658 | 7.86E-01 | 7.70E-01 | 2.49E-01 | 2.93 | 1.87 | Veillonella_parvula_98              | Bacteria_Firmicutes_Negativicutes_Veillonellales_Veillonellaceae_Veillonella_100                                     |
| OTU_380   | 7.07E-01 | 6.04E-01 | 1.76E-01 | 5.11 | 0.45 | Acetivibrio_thermocellus_89         | Bacteria_Firmicutes_Clostridia_98_Clostridiales_98_Ruminococcaceae_91_Monoglobus_28                                  |
| OTU_42361 | 9.99E-01 | 6.04E-01 | 6.27E-04 | 6.60 | 0.37 | Bacteroides_xylanisolvens_97        | Bacteria_Bacteroidetes_Bacteroidia_Bacteroidales_Bacteroidaceae_Bacteroides_100                                      |
| OTU_627   | 7.07E-01 | 9.37E-01 | 1.72E-03 | 5.10 | 0.34 | Enterococcus_diestrammenae_89       | Bacteria_Firmicutes_Clostridia_68_Clostridiales_68_Clostridiaceae_1_68_Desnuesiella_29                               |
| OTU_799   | 7.07E-01 | 9.12E-01 | 1.73E-02 | 1.60 | 3.29 | Shigella_dysenteriae_93             | Bacteria_Proteobacteria_Deltaproteobacteria_86_Desulfovibrionales_86_Desulfovibrionaceae_86_Bilophila_86             |
| OTU_937   | 8.54E-01 | 7.34E-01 | 2.07E-02 | 4.76 | 1.51 | Erwinia_iniecta_94                  | Bacteria_Proteobacteria_Gammaproteobacteria_99_Enterobacterales_99_Enterobacteriaceae_98_Pseudescherichia_49         |
| OTU_1435  | 8.60E-01 | 9.62E-01 | 1.68E-02 | 5.54 | 1.22 | Sutterella_massiliensis_97          | Bacteria_Proteobacteria_Betaproteobacteria_Burkholderiales_Sutterellaceae_Sutterella_100                             |
| OTU_548   | 8.74E-01 | 6.04E-01 | 3.33E-02 | 7.19 | 0.51 | Muribaculum_intestinale_88          | Bacteria_Bacteroidetes_Bacteroidia_97_Bacteroidales_97_Muribaculaceae_84_Muribaculum_51                              |
| OTU_137   | 9.53E-01 | 9.84E-01 | 1.37E-01 | 0.83 | 0.27 | Clostridium_spiriforme_93           | Bacteria_Firmicutes_Erysipelotrichia_Erysipelotrichales_Erysipelotrichaceae_Faecalibacillus_100                      |
| OTU_747   | 7.57E-01 | 6.04E-01 | 2.18E-02 | 5.50 | 1.04 | Clostridium_quinii_90               | Bacteria_Proteobacteria_92_Gammaproteobacteria_92_Enterobacterales_92_Enterobacteriaceae_91_Pseudescherichia_78      |
| OTU_951   | 7.11E-01 | 6.39E-01 | 1.07E-01 | 5.30 | 1.43 | Bacteroides_intestinalis_97         | Bacteria_Bacteroidetes_Bacteroidia_Bacteroidales_Bacteroidaceae_Bacteroides_100                                      |
| OTU_10457 | 9.62E-01 | 9.04E-01 | 9.49E-01 | 3.11 | 3.05 | Falcatimonas_natans_97              | Bacteria_Firmicutes_Clostridia_Clostridiales_Lachnospiraceae_Clostridium_XIVa_25                                     |
| OTU_1905  | 7.07E-01 | 7.65E-01 | 2.84E-05 | 5.14 | 1.41 | Clostridium_perfringens_96          | Bacteria_Firmicutes_Clostridia_Clostridiales_Lachnospiraceae_59_Fusicatenibacter_10                                  |
| OTU_29125 | 7.81E-01 | 6.50E-01 | 5.03E-01 | 3.85 | 3.23 | Bacteroides_thetaiotaomicron_98     | Bacteria_Bacteroidetes_Bacteroidia_Bacteroidales_Bacteroidaceae_Bacteroides_100                                      |
| OTU_68715 | 7.07E-01 | 6.56E-01 | 1.19E-01 | 0.77 | 0.19 | Bifidobacterium_stercoris_98        | Bacteria_Actinobacteria_Actinobacteria_Bifidobacteriales_Bifidobacteriaceae_Bifidobacterium_97                       |
| OTU_1138  | 7.93E-01 | 9.57E-01 | 6.46E-02 | 4.56 | 1.80 | Blautia_coccoides_94                | Bacteria_Firmicutes_Clostridia_Clostridiales_Lachnospiraceae_94_Blautia_75                                           |
| OTU_1151  | 8.25E-01 | 6.56E-01 | 2.57E-01 | 2.41 | 4.26 | Roseburia_inulinivorans_94          | Bacteria_Firmicutes_Clostridia_Clostridiales_Lachnospiraceae_73_Agathobacter_33                                      |
| OTU_3565  | 8.94E-01 | 6.76E-01 | 2.02E-03 | 5.52 | 1.07 | Clostridium_ulininosum_90           | Bacteria_Firmicutes_Negativicutes_49_Selenomonadales_34_Sporomusaceae_34_Anaerosinus_34                              |
| OTU_844   | 7.12E-01 | 6.04E-01 | 7.59E-01 | 1.62 | 1.41 | Slackia_isoflavoniconvertens_94     | Bacteria_Actinobacteria_96_Coriobacteriia_96_Eggerthellales_96_Eggerthellaceae_96_Slackia_96                         |
| OTU_845   | 7.07E-01 | 6.08E-01 | 6.06E-01 | 1.59 | 1.19 | Collinsella_aerofaciens_93          | Bacteria_Actinobacteria_92_Coriobacteriia_92_Coriobacteriales_92_Coriobacteriaceae_91_Collinsella_91                 |



|           |          |          |          |      |      |                                     |                                                                                                                     |
|-----------|----------|----------|----------|------|------|-------------------------------------|---------------------------------------------------------------------------------------------------------------------|
| OTU_1402  | 7.46E-01 | 8.34E-01 | 1.50E-01 | 4.04 | 2.62 | Coprococcus_comes_97                | Bacteria_Firmicutes_Clostridia_Clostridiales_Lachnospiraceae_Coprococcus_34                                         |
| OTU_2038  | 7.57E-01 | 9.47E-01 | 7.10E-04 | 5.67 | 0.35 | Parabacteroides_distasonis_93       | Bacteria_Bacteroidetes_Bacteroidia_Bacteroidales_Bacteroidaceae_73_Bacteroides_65                                   |
| OTU_938   | 9.45E-01 | 6.10E-01 | 7.54E-02 | 3.99 | 1.94 | Sutterella_massiliensis_95          | Bacteria_Proteobacteria_Betaproteobacteria_98_Burkholderiales_98_Sutterellaceae_98_Sutterella_98                    |
| OTU_1332  | 8.57E-01 | 4.60E-01 | 3.12E-01 | 3.45 | 2.57 | Clostridium_perfringens_97          | Bacteria_Firmicutes_Clostridia_95_Clostridiales_95_Clostridiaceae_1_95_Clostridium_sensu_stricto_78                 |
| OTU_3237  | 9.10E-01 | 6.04E-01 | 8.56E-05 | 5.17 | 1.90 | Bacteroides_uniformis_97            | Bacteria_Bacteroidetes_Bacteroidia_Bacteroidales_Bacteroidaceae_Bacteroides_100                                     |
| OTU_410   | 9.59E-01 | 9.97E-01 | 9.20E-03 | 3.03 | 0.69 | Pseudoflavonifractor_phocaeensis_96 | Bacteria_Firmicutes_Clostridia_Clostridiales_Ruminococcaceae_Intestinimonas_100                                     |
| OTU_1425  | 7.07E-01 | 6.04E-01 | 8.94E-01 | 2.82 | 2.44 | Raoultella_planticola_91            | Bacteria_Proteobacteria_99_Gammaproteobacteria_99_Enterobacterales_98_Enterobacteriaceae_98_Pseudescherichia_95     |
| OTU_1107  | 7.91E-01 | 6.04E-01 | 5.05E-02 | 1.58 | 0.36 | Megamonas_funiformis_99             | Bacteria_Firmicutes_Negativicutes_Selenomonadales_Selenomonadaceae_Megamonas_100                                    |
| OTU_4007  | 7.07E-01 | 6.04E-01 | 1.68E-02 | 4.19 | 2.13 | Clostridium_perfringens_97          | Bacteria_Firmicutes_Clostridia_Clostridiales_Clostridiaceae_1_96_Sarcina_27                                         |
| OTU_4032  | 9.38E-01 | 6.04E-01 | 2.47E-02 | 2.25 | 0.96 | Phocaeicola_vulgatus_95             | Bacteria_Bacteroidetes_Bacteroidia_Bacteroidales_Bacteroidaceae_Phocaeicola_99                                      |
| OTU_725   | 7.07E-01 | 6.04E-01 | 1.31E-01 | 5.72 | 0.71 | Vagococcus_carniphilus_92           | Bacteria_Firmicutes_Bacilli_Lactobacillales_Streptococcaceae_58_Streptococcus_56                                    |
| OTU_1390  | 9.67E-01 | 9.53E-01 | 2.48E-01 | 1.24 | 2.50 | Enterocloster_clostridioformis_96   | Bacteria_Firmicutes_Clostridia_Clostridiales_Lachnospiraceae_Enterocloster_54                                       |
| OTU_3975  | 9.64E-01 | 6.14E-01 | 1.48E-02 | 2.19 | 3.56 | Enterocloster_citroniae_97          | Bacteria_Firmicutes_Clostridia_Clostridiales_Lachnospiraceae_Enterocloster_99                                       |
| OTU_5325  | 7.07E-01 | 6.14E-01 | 4.23E-01 | 1.54 | 1.19 | Hungatella_xylanolytica_96          | Bacteria_Firmicutes_Clostridia_Clostridiales_Lachnospiraceae_Kineothrix_45                                          |
| OTU_7115  | 7.85E-01 | 6.04E-01 | 2.63E-02 | 3.49 | 2.23 | Clostridium_perfringens_97          | Bacteria_Firmicutes_Clostridia_Clostridiales_Clostridiaceae_1_Clostridium_sensu_stricto_69                          |
| OTU_850   | 7.07E-01 | 5.32E-01 | 1.42E-01 | 2.72 | 0.54 | Streptococcus_vestibularis_98       | Bacteria_Firmicutes_Clostridia_61_Clostridiales_61_Lachnospiraceae_61_Catonella_44                                  |
| OTU_8912  | 7.46E-01 | 6.73E-01 | 1.70E-02 | 1.45 | 4.25 | Faecalibacterium_prausnitzii_94     | Bacteria_Firmicutes_Clostridia_Clostridiales_Ruminococcaceae_Faecalibacterium_65                                    |
| OTU_1454  | 7.91E-01 | 6.81E-01 | 1.45E-01 | 1.04 | 0.58 | Parabacteroides_chongii_94          | Bacteria_Bacteroidetes_Bacteroidia_Bacteroidales_Porphyromonadaceae_98_Parabacteroides_96                           |
| OTU_676   | 9.38E-01 | 8.42E-01 | 1.21E-02 | 0.91 | 5.02 | Pseudescherichia_vulneris_99        | Bacteria_Proteobacteria_96_Gammaproteobacteria_96_Enterobacterales_96_Enterobacteriaceae_96_Pseudescherichia_88     |
| OTU_2312  | 8.31E-01 | 8.42E-01 | 9.28E-02 | 1.92 | 2.89 | Enterocloster_citroniae_96          | Bacteria_Firmicutes_Clostridia_Clostridiales_Lachnospiraceae_Enterocloster_100                                      |
| OTU_307   | 7.07E-01 | 6.04E-01 | 9.96E-02 | 5.04 | 1.36 | Olsenella_profusa_97                | Bacteria_Actinobacteria_Coriobacteriia_Coriobacteriales_Atopobiaceae_Olsenella_100                                  |
| OTU_33157 | 7.07E-01 | 7.95E-01 | 7.30E-01 | 2.71 | 2.38 | Veillonella_dispar_97               | Bacteria_Firmicutes_Negativicutes_Veillonellales_Veillonellaceae_Veillonella_100                                    |
| OTU_9908  | 7.80E-01 | 6.04E-01 | 4.02E-01 | 3.38 | 2.79 | Clostridium_perfringens_96          | Bacteria_Firmicutes_Clostridia_Clostridiales_Clostridiaceae_1_83_Desnuesiella_34                                    |
| OTU_417   | 8.06E-01 | 7.07E-01 | 1.64E-01 | 0.56 | 0.16 | Collinsella_aerofaciens_100         | Bacteria_Actinobacteria_92_Coriobacteriia_92_Coriobacteriales_92_Coriobacteriaceae_92_Collinsella_90                |
| OTU_12155 | 8.85E-01 | 9.12E-01 | 9.81E-01 | 1.26 | 1.25 | Dorea_formicigenans_96              | Bacteria_Firmicutes_Clostridia_Clostridiales_Lachnospiraceae_Dorea_64                                               |
| OTU_2161  | 9.78E-01 | 8.52E-01 | 4.57E-01 | 3.68 | 2.90 | Roseburia_inulinivorans_91          | Bacteria_Proteobacteria_41_Gammaproteobacteria_41_Enterobacterales_40_Enterobacteriaceae_40_Pseudescherichia_37     |
| OTU_851   | 8.06E-01 | 6.72E-01 | 1.81E-01 | 0.77 | 0.32 | Bacteroides_uniformis_96            | Bacteria_Bacteroidetes_Bacteroidia_Bacteroidales_Bacteroidaceae_Bacteroides_82                                      |
| OTU_14783 | 7.07E-01 | 9.90E-01 | 1.26E-02 | 1.34 | 5.01 | Veillonella_dispar_95               | Bacteria_Firmicutes_Negativicutes_Veillonellales_94_Veillonellaceae_94_Veillonella_93                               |
| OTU_4158  | 7.07E-01 | 6.04E-01 | 1.71E-02 | 3.85 | 1.70 | Bacteroides_xylanisolvans_98        | Bacteria_Bacteroidetes_Bacteroidia_Bacteroidales_Bacteroidaceae_Bacteroides_100                                     |
| OTU_4717  | 7.73E-01 | 6.04E-01 | 1.11E-04 | 4.29 | 0.92 | Bacteroides_caecimuris_95           | Bacteria_Bacteroidetes_Bacteroidia_Bacteroidales_Bacteroidaceae_Bacteroides_93                                      |
| OTU_5618  | 7.91E-01 | 9.34E-01 | 2.22E-01 | 2.51 | 3.43 | Serratia_surfactantfaciens_94       | Bacteria_Proteobacteria_Gammaproteobacteria_Enterobacterales_Enterobacteriaceae_Escherichia/Shigella_85             |
| OTU_1178  | 8.25E-01 | 8.27E-01 | 2.12E-02 | 3.50 | 1.24 | Clostridium_perfringens_97          | Bacteria_Bacteroidetes_55_Bacteroidia_54_Bacteroidales_54_Bacteroidaceae_53_Phocaeicola_42                          |
| OTU_7139  | 7.46E-01 | 8.45E-01 | 3.14E-01 | 2.90 | 2.21 | Blautia_hominis_98                  | Bacteria_Firmicutes_Clostridia_Clostridiales_Lachnospiraceae_Blautia_84                                             |
| OTU_1290  | 8.30E-01 | 6.04E-01 | 9.00E-02 | 3.52 | 0.89 | Allobaculum_stercoricanis_88        | Bacteria_Firmicutes_Erysipelotrichia_Erysipelotrichales_Erysipelotrichaceae_Faecalibaculum_20                       |
| OTU_17689 | 8.06E-01 | 9.85E-01 | 6.05E-01 | 3.42 | 3.09 | Sellimonas_intestinalis_96          | Bacteria_Firmicutes_Clostridia_Clostridiales_Lachnospiraceae_Mediterraneibacter_37                                  |
| OTU_3223  | 8.06E-01 | 6.63E-01 | 1.23E-01 | 2.33 | 3.28 | Paraclostridium_benzoelyticum_96    | Bacteria_Firmicutes_Clostridia_Clostridiales_Peptostreptococcaceae_Paraclostridium_96                               |
| OTU_2181  | 7.57E-01 | 9.46E-01 | 3.61E-04 | 4.62 | 0.73 | Streptococcus_porcorum_88           | Bacteria_Proteobacteria_50_Gammaproteobacteria_50_Enterobacterales_50_Enterobacteriaceae_50_Pseudescherichia_50     |
| OTU_4794  | 9.93E-01 | 8.83E-01 | 6.30E-01 | 2.83 | 2.57 | Enterocloster_citroniae_96          | Bacteria_Firmicutes_Clostridia_Clostridiales_Lachnospiraceae_Enterocloster_60                                       |
| OTU_810   | 7.07E-01 | 9.54E-01 | 2.71E-02 | 1.78 | 4.02 | Lutispora_thermophila_88            | Bacteria_Proteobacteria_92_Gammaproteobacteria_92_Enterobacterales_91_Enterobacteriaceae_91_Pseudescherichia_83     |
| OTU_815   | 9.69E-01 | 6.63E-01 | 4.25E-04 | 5.08 | 0.53 | Clostridium_symbiosum_93            | Bacteria_Firmicutes_Clostridia_Clostridiales_Lachnospiraceae_99_Clostridium_XIVa_56                                 |
| OTU_1135  | 8.83E-01 | 5.09E-01 | 1.97E-03 | 4.94 | 1.19 | Clostridium_perfringens_95          | Bacteria_Firmicutes_Clostridia_Clostridiales_Clostridiaceae_1_48_Clostridium_sensu_stricto_28                       |
| OTU_25591 | 8.53E-01 | 6.04E-01 | 5.05E-02 | 2.08 | 3.43 | Enterococcus_faecalis_98            | Bacteria_Firmicutes_Bacilli_Lactobacillales_Enterococcaceae_99_Enterococcus_93                                      |
| OTU_1009  | 9.04E-01 | 9.82E-01 | 3.13E-04 | 4.59 | 0.79 | Pseudescherichia_vulneris_99        | Bacteria_Proteobacteria_98_Gammaproteobacteria_98_Enterobacterales_97_Enterobacteriaceae_97_Pseudescherichia_79     |
| OTU_11600 | 9.38E-01 | 9.74E-01 | 2.06E-02 | 1.84 | 2.98 | Pseudescherichia_vulneris_89        | Bacteria_Proteobacteria_95_Gammaproteobacteria_95_Enterobacterales_95_Enterobacteriaceae_95_Pseudescherichia_80     |
| OTU_4111  | 9.38E-01 | 9.46E-01 | 3.74E-03 | 3.76 | 0.63 | Collinsella_aerofaciens_98          | Bacteria_Actinobacteria_76_Coriobacteriia_76_Coriobacteriales_76_Coriobacteriaceae_75_Collinsella_71                |
| OTU_642   | 9.59E-01 | 6.43E-01 | 2.23E-02 | 2.94 | 0.58 | Lacrimispora_indolis_97             | Bacteria_Firmicutes_Clostridia_Clostridiales_Lachnospiraceae_Lacrimispora_48                                        |
| OTU_1153  | 7.75E-01 | 6.66E-01 | 4.62E-01 | 2.58 | 2.09 | Blautia_producta_98                 | Bacteria_Firmicutes_71_Clostridia_71_Clostridiales_71_Lachnospiraceae_71_Fusicatenibacter_13                        |
| OTU_2285  | 8.94E-01 | 7.33E-01 | 3.34E-01 | 3.00 | 2.53 | Clostridium_symbiosum_95            | Bacteria_Firmicutes_Clostridia_Clostridiales_Lachnospiraceae_Clostridium_XIVa_61                                    |
| OTU_47936 | 7.11E-01 | 7.73E-01 | 7.06E-02 | 1.80 | 3.70 | Bacteroides_thetaiotaomicron_99     | Bacteria_Bacteroidetes_Bacteroidia_Bacteroidales_Bacteroidaceae_Bacteroides_100                                     |
| OTU_933   | 7.07E-01 | 6.57E-01 | 3.30E-01 | 3.14 | 1.96 | Slackia_isoflavoniconvertens_96     | Bacteria_Proteobacteria_59_Gammaproteobacteria_59_Enterobacterales_59_Enterobacteriaceae_59_Pseudescherichia_59     |
| OTU_14549 | 8.68E-01 | 9.54E-01 | 1.60E-02 | 1.91 | 3.08 | Pseudescherichia_vulneris_92        | Bacteria_Proteobacteria_96_Gammaproteobacteria_96_Enterobacterales_96_Enterobacteriaceae_96_Pseudescherichia_96     |
| OTU_1467  | 8.82E-01 | 9.62E-01 | 9.21E-02 | 1.43 | 4.83 | Veillonella_tobetsuensis_89         | Bacteria_Firmicutes_Clostridia_93_Clostridiales_93_Lachnospiraceae_93_Merdimonas_40                                 |
| OTU_15493 | 7.07E-01 | 7.02E-01 | 4.66E-01 | 4.08 | 1.36 | Cronobacter_sakazakii_98            | Bacteria_Proteobacteria_Gammaproteobacteria_Enterobacterales_Enterobacteriaceae_Cronobacter_38                      |
| OTU_2137  | 7.07E-01 | 9.94E-01 | 1.86E-02 | 5.25 | 0.48 | Mobilitalea_sibirica_88             | Bacteria_Bacteroidetes_68_Bacteroidia_67_Bacteroidales_67_Bacteroidaceae_67_Mediterranea_31                         |
| OTU_50095 | 9.38E-01 | 9.12E-01 | 2.34E-03 | 1.59 | 3.36 | Pseudescherichia_vulneris_97        | Bacteria_Proteobacteria_Gammaproteobacteria_Enterobacterales_Enterobacteriaceae_Escherichia/Shigella_83             |
| OTU_848   | 7.07E-01 | 6.04E-01 | 4.25E-01 | 1.91 | 3.07 | Veillonella_dispar_98               | Bacteria_Firmicutes_Negativicutes_64_Veillonellales_50_Veillonellaceae_50_Veillonella_46                            |
| OTU_1727  | 8.11E-01 | 6.04E-01 | 1.31E-07 | 5.05 | 1.04 | Parabacteroides_distasonis_96       | Bacteria_Bacteroidetes_Bacteroidia_Bacteroidales_Porphyromonadaceae_Parabacteroides_100                             |
| OTU_1765  | 9.61E-01 | 9.75E-01 | 9.50E-01 | 3.04 | 3.12 | Clostridium_perfringens_97          | Bacteria_Firmicutes_Clostridia_Clostridiales_Clostridiaceae_1_Clostridium_sensu_stricto_46                          |
| OTU_3363  | 9.45E-01 | 6.04E-01 | 1.43E-01 | 3.32 | 2.14 | Clostridium_perfringens_99          | Bacteria_Firmicutes_73_Clostridia_73_Clostridiales_73_Clostridiaceae_1_73_Anaerobacter_26                           |
| OTU_3590  | 9.60E-01 | 6.22E-01 | 1.72E-02 | 3.65 | 1.57 | Pseudescherichia_vulneris_95        | Bacteria_Proteobacteria_99_Gammaproteobacteria_99_Enterobacterales_99_Enterobacteriaceae_99_Escherichia/Shigella_55 |
| OTU_821   | 7.07E-01 | 6.07E-01 | 1.45E-04 | 5.29 | 0.55 | Hungatella_effluvii_94              | Bacteria_Firmicutes_Clostridia_Clostridiales_Lachnospiraceae_Clostridium_XIVa_31                                    |
| OTU_2468  | 8.06E-01 | 6.62E-01 | 2.17E-04 | 3.19 | 0.26 | Bacteroides_finegoldii_98           | Bacteria_Bacteroidetes_Bacteroidia_Bacteroidales_Bacteroidaceae_Bacteroides_100                                     |
| OTU_3482  | 7.07E-01 | 6.16E-01 | 4.96E-02 | 2.32 | 0.33 | Bifidobacterium_stercoris_98        | Bacteria_Actinobacteria_Actinobacteria_Bifidobacteriales_Bifidobacteriaceae_Bifidobacterium_99                      |
| OTU_680   | 9.87E-01 | 7.40E-01 | 9.05E-03 | 1.00 | 2.43 | Desulfovibrio_intestinalis_92       | Bacteria_Proteobacteria_Deltaproteobacteria_Desulfovibrionales_Desulfovibrionaceae_Bilophila_100                    |
| OTU_837   | 7.07E-01 | 9.74E-01 | 1.12E-02 | 5.87 | 0.70 | Bacteroides_stercoris_96            | Bacteria_Bacteroidetes_Bacteroidia_Bacteroidales_Bacteroidaceae_Bacteroides_95                                      |
| OTU_597   | 7.07E-01 | 6.04E-01 | 6.18E-01 | 2.64 | 4.05 | Veillonella_dispar_96               | Bacteria_Firmicutes_Negativicutes_Veillonellales_Veillonellaceae_Veillonella_82                                     |
| OTU_10445 | 8.41E-01 | 6.04E-01 | 4.12E-03 | 3.92 | 1.60 | Clostridium_uliginosum_89           | Bacteria_Firmicutes_Negativicutes_62_Selenomonadales_24_Sporomusaceae_21_Anaerosinus_16                             |

|            |          |          |          |      |      |                                    |                                                                                                                 |
|------------|----------|----------|----------|------|------|------------------------------------|-----------------------------------------------------------------------------------------------------------------|
| OTU_2010   | 7.46E-01 | 8.65E-01 | 1.49E-02 | 4.71 | 0.81 | Bacteroides_clarus_98              | Bacteria_Bacteroidetes_Bacteroidia_Bacteroidales_Bacteroidaceae_Bacteroides_97                                  |
| OTU_269    | NA       | 6.76E-01 | 7.45E-02 | 0.00 | 5.80 | Oharaeibacter_diazotrophicus_100   | Bacteria_Proteobacteria_Alphaproteobacteria_Rhizobiales_Pleomorphomonadaceae_96_Oharaeibacter_96                |
| OTU_30088  | 8.57E-01 | 9.41E-01 | 3.75E-04 | 4.20 | 0.57 | Bacteroides_thetaiotaomicron_96    | Bacteria_Bacteroidetes_Bacteroidia_Bacteroidales_Bacteroidaceae_Bacteroides_93                                  |
| OTU_48536  | 7.85E-01 | 6.04E-01 | 3.21E-01 | 1.76 | 2.40 | Enterococcus_faecalis_98           | Bacteria_Firmicutes_Bacilli_Lactobacillales_Enterococcaceae_98_Enterococcus_84                                  |
| OTU_2078   | 7.57E-01 | 7.04E-01 | 1.15E-02 | 2.95 | 0.88 | Enterocloster_citroniae_91         | Bacteria_Firmicutes_Clostridia_Clostridiales_Lachnospiraceae_Enterocloster_94                                   |
| OTU_2880   | 9.92E-01 | 6.04E-01 | 1.72E-01 | 2.00 | 3.40 | Clostridium_symbiosum_95           | Bacteria_Firmicutes_Clostridia_Clostridiales_Lachnospiraceae_Enterocloster_50                                   |
| OTU_4754   | 8.53E-01 | 6.72E-01 | 1.67E-01 | 3.35 | 2.22 | Veillonella_parvula_99             | Bacteria_Firmicutes_77_Negativicutes_75_Selenomonadales_32_Sporomusaceae_30_Anaerosinus_22                      |
| OTU_749    | 8.67E-01 | 6.63E-01 | 6.41E-02 | 2.92 | 1.85 | Faecalicatena_erotica_96           | Bacteria_Firmicutes_Clostridia_Clostridiales_Lachnospiraceae_92_Lachnospiraceae_incertae_sedis_38               |
| OTU_1335   | 9.58E-01 | 7.31E-01 | 1.43E-04 | 4.99 | 0.39 | Bacteroides_thetaiotaomicron_97    | Bacteria_Bacteroidetes_Bacteroidia_Bacteroidales_Bacteroidaceae_Bacteroides_100                                 |
| OTU_15945  | 9.31E-01 | 9.62E-01 | 5.30E-01 | 3.28 | 2.89 | Roseburia_inulinivorans_96         | Bacteria_Firmicutes_Clostridia_Clostridiales_Lachnospiraceae_Mediterraneibacter_25                              |
| OTU_321    | 8.25E-01 | 6.04E-01 | 3.77E-02 | 3.76 | 0.51 | Kineothrix_allysoides_97           | Bacteria_Firmicutes_Clostridia_Clostridiales_Lachnospiraceae_Kineothrix_82                                      |
| OTU_530    | 8.31E-01 | 9.62E-01 | 2.98E-01 | 3.17 | 2.39 | Anaerobium_acetethylicum_96        | Bacteria_Firmicutes_Clostridia_Clostridiales_Lachnospiraceae_Clostridium_XIVa_26                                |
| OTU_886    | 7.94E-01 | 6.05E-01 | 8.80E-03 | 4.49 | 0.58 | Veillonella_parvula_89             | Bacteria_Firmicutes_Negativicutes_90_Veillonellales_87_Veillonellaceae_87_Veillonella_87                        |
| OTU_39776  | 9.32E-01 | 9.41E-01 | 3.74E-03 | 5.27 | 0.22 | Parabacteroides_distasonis_98      | Bacteria_Bacteroidetes_Bacteroidia_Bacteroidales_Porphyromonadaceae_Parabacteroides_100                         |
| OTU_66375  | 8.97E-01 | 9.62E-01 | 1.15E-02 | 4.55 | 0.90 | Hungatella_effluvii_94             | Bacteria_Firmicutes_79_Clostridia_79_Clostridiales_79_Lachnospiraceae_79_Merdimonas_24                          |
| OTU_3924   | 7.34E-01 | 8.65E-01 | 1.27E-02 | 1.95 | 3.59 | Escherichia_coli_88                | Bacteria_Firmicutes_85_Clostridia_85_Clostridiales_85_Lachnospiraceae_85_Eisenbergiella_82                      |
| OTU_520    | NA       | 9.25E-01 | 6.25E-02 | 0.00 | 3.98 | Polyangium_sorediatum_96           | Bacteria_Proteobacteria_Deltaproteobacteria_Myxococcales_Sorangineae_Polyangiaceae_Polyangium_56                |
| OTU_727    | 7.07E-01 | 8.50E-01 | 4.27E-02 | 5.43 | 0.41 | Bacteroides_stercoris_96           | Bacteria_Bacteroidetes_Bacteroidia_Bacteroidales_Bacteroidaceae_91_Bacteroides_89                               |
| OTU_405    | 9.32E-01 | 8.79E-01 | 1.50E-02 | 0.47 | 4.55 | Phascolarctobacterium_faecium_99   | Bacteria_Firmicutes_Negativicutes_99_Acidaminococcales_99_Acidaminococcaceae_99_Phascolarctobacterium_98        |
| OTU_707    | 7.07E-01 | 9.46E-01 | 5.75E-02 | 5.95 | 0.31 | Bacteroides_stercoris_96           | Bacteria_Bacteroidetes_Bacteroidia_Bacteroidales_Bacteroidaceae_Bacteroides_95                                  |
| OTU_272    | 7.93E-01 | 6.04E-01 | 1.78E-01 | 5.53 | 1.78 | Anaerostipes_caccae_100            | Bacteria_Firmicutes_Clostridia_Clostridiales_Lachnospiraceae_Anaerostipes_100                                   |
| OTU_606    | 9.43E-01 | 6.10E-01 | 4.68E-02 | 5.28 | 0.50 | Ruminiclostridium_cellobioparum_86 | Bacteria_Firmicutes_96_Clostridia_91_Clostridiales_91_Lachnospiraceae_32_Lactonifactor_12                       |
| OTU_1761   | 9.05E-01 | 7.65E-01 | 2.53E-01 | 3.44 | 2.40 | Clostridium_perfringens_92         | Bacteria_Firmicutes_Clostridia_Clostridiales_Lachnospiraceae_81_Fusicatenibacter_17                             |
| OTU_1866   | 8.57E-01 | 6.04E-01 | 3.14E-02 | 4.40 | 1.33 | Pseudescherichia_vulneris_97       | Bacteria_Proteobacteria_Gammaproteobacteria_Enterobacterales_Enterobacteriaceae_Escherichia/Shigella_70         |
| OTU_4691   | 9.87E-01 | 9.66E-01 | 4.03E-03 | 4.39 | 0.13 | Veillonella_atypica_91             | Bacteria_Firmicutes_Negativicutes_Veillonellales_55_Veillonellaceae_55_Veillonella_53                           |
| OTU_705    | 7.07E-01 | 6.81E-01 | 1.97E-01 | 1.97 | 0.28 | Collinsella_aerofaciens_98         | Bacteria_Actinobacteria_74_Coriobacteriia_74_Coriobacteriales_74_Coriobacteriaceae_72_Collinsella_69            |
| OTU_1751   | 7.07E-01 | 9.73E-01 | 1.62E-02 | 2.23 | 3.87 | Bacteroides_kribbi_94              | Bacteria_Bacteroidetes_98_Bacteroidia_98_Bacteroidales_98_Bacteroidaceae_98_Bacteroides_95                      |
| OTU_363    | NA       | 7.95E-01 | 1.75E-02 | 0.00 | 2.96 | Methylotenera_mobilis_97           | Bacteria_Proteobacteria_Betaproteobacteria_Nitrosomonadales_Methylophilaceae_Methylophilus_81                   |
| OTU_2199   | 9.38E-01 | 8.73E-01 | 3.87E-02 | 1.85 | 2.93 | Enterocloster_aldensis_97          | Bacteria_Firmicutes_Clostridia_Clostridiales_Lachnospiraceae_Enterocloster_91                                   |
| OTU_263    | 9.92E-01 | 7.99E-01 | 4.59E-01 | 1.20 | 0.88 | Oscillibacter_ruminantium_92       | Bacteria_Firmicutes_Clostridia_Clostridiales_Ruminococcaceae_Dysosmobacter_21                                   |
| OTU_27510  | 8.25E-01 | 6.66E-01 | 2.11E-02 | 4.00 | 1.59 | Clostridium_perfringens_96         | Bacteria_Firmicutes_Clostridia_Clostridiales_Clostridiaceae_1_69_Clostridium_sensu_stricto_49                   |
| OTU_2976   | 9.90E-01 | 9.03E-01 | 6.83E-03 | 1.76 | 4.93 | Bacteroides_timonensis_98          | Bacteria_Bacteroidetes_Bacteroidia_Bacteroidales_Bacteroidaceae_Bacteroides_100                                 |
| OTU_768    | 7.11E-01 | 6.10E-01 | 5.98E-02 | 4.01 | 0.60 | Collinsella_aerofaciens_100        | Bacteria_Actinobacteria_82_Coriobacteriia_82_Coriobacteriales_82_Coriobacteriaceae_80_Collinsella_79            |
| OTU_10230  | 9.67E-01 | 9.17E-01 | 1.98E-02 | 3.75 | 1.85 | Enterococcus_thailandicus_97       | Bacteria_Firmicutes_Bacilli_Lactobacillales_98_Enterococcaceae_87_Vagococcus_31                                 |
| OTU_1265   | 7.23E-01 | 9.32E-01 | 2.94E-02 | 4.06 | 0.34 | Bacteroides_uniformis_96           | Bacteria_Bacteroidetes_Bacteroidia_Bacteroidales_Bacteroidaceae_85_Bacteroides_78                               |
| OTU_11828  | 7.45E-01 | 4.60E-01 | 1.92E-02 | 3.45 | 1.41 | Peptoniphilus_grossensis_97        | Bacteria_Firmicutes_Clostridia_Clostridiales_Peptoniphilaceae_Peptoniphilus_100                                 |
| OTU_305    | 7.07E-01 | 6.04E-01 | 7.68E-01 | 0.29 | 0.36 | Kluyvera_intermedia_91             | Bacteria_Proteobacteria_Gammaproteobacteria_Enterobacterales_Enterobacteriaceae_97_Lecclercia_59                |
| OTU_5090   | 1.00E+00 | 6.04E-01 | 7.55E-03 | 1.93 | 3.20 | Pseudescherichia_vulneris_90       | Bacteria_Proteobacteria_78_Gammaproteobacteria_78_Enterobacterales_78_Enterobacteriaceae_78_Pseudescherichia_78 |
| OTU_1941   | 7.07E-01 | 9.42E-01 | 3.40E-02 | 1.36 | 3.29 | Phascolarctobacterium_faecium_96   | Bacteria_Firmicutes_Negativicutes_99_Acidaminococcales_99_Acidaminococcaceae_99_Phascolarctobacterium_99        |
| OTU_653    | 9.99E-01 | 9.69E-01 | 5.31E-03 | 5.37 | 0.35 | Sutterella_wadsworthensis_98       | Bacteria_Proteobacteria_99_Betaproteobacteria_99_Burkholderiales_99_Sutterellaceae_96_Sutterella_96             |
| OTU_20677  | 9.32E-01 | 7.02E-01 | 1.24E-01 | 3.01 | 1.64 | Veillonella_parvula_98             | Bacteria_Firmicutes_Negativicutes_Veillonellales_Veillonellaceae_Veillonella_100                                |
| OTU_2267   | 7.07E-01 | 7.73E-01 | 8.93E-03 | 0.72 | 4.21 | Bacteroides_kribbi_96              | Bacteria_Bacteroidetes_Bacteroidia_Bacteroidales_Bacteroidaceae_Bacteroides_90                                  |
| OTU_234    | 8.16E-01 | 6.04E-01 | 1.38E-01 | 4.54 | 1.10 | Eubacterium_rectale_95             | Bacteria_Firmicutes_Clostridia_Clostridiales_Lachnospiraceae_Mediterraneibacter_63                              |
| OTU_5786   | 9.92E-01 | 8.40E-01 | 8.87E-01 | 2.31 | 2.22 | Veillonella_parvula_98             | Bacteria_Firmicutes_Negativicutes_Veillonellales_Veillonellaceae_Veillonella_100                                |
| OTU_583    | 9.60E-01 | 6.04E-01 | 6.29E-01 | 1.97 | 2.52 | Acidaminococcus_fermentans_98      | Bacteria_Firmicutes_Negativicutes_99_Acidaminococcales_99_Acidaminococcaceae_99_Acidaminococcus_98              |
| OTU_1122   | 8.64E-01 | 6.50E-01 | 1.69E-01 | 2.29 | 3.24 | Acidaminococcus_fermentans_88      | Bacteria_Firmicutes_80_Negativicutes_80_Acidaminococcales_80_Acidaminococcaceae_80_Acidaminococcus_78           |
| OTU_2115   | 1.00E+00 | 6.65E-01 | 5.91E-02 | 1.99 | 3.56 | Lachnoclostridium_pacaense_95      | Bacteria_Firmicutes_Clostridia_Clostridiales_Lachnospiraceae_Kineothrix_28                                      |
| OTU_506    | 7.07E-01 | 6.63E-01 | 4.57E-01 | 0.55 | 0.83 | Collinsella_aerofaciens_93         | Bacteria_Actinobacteria_Coriobacteriia_Coriobacteriales_Coriobacteriaceae_Collinsella_98                        |
| OTU_7202   | 7.46E-01 | 6.04E-01 | 3.89E-01 | 2.36 | 3.11 | Paraclostridium_benzoelyticum_97   | Bacteria_Firmicutes_Clostridia_Clostridiales_Peptostreptococcaceae_Paraclostridium_95                           |
| OTU_720    | 8.64E-01 | 6.04E-01 | 1.43E-01 | 3.02 | 1.89 | Peptoniphilus_tyrrelliae_95        | Bacteria_Firmicutes_Clostridia_Clostridiales_Peptoniphilaceae_99_Peptoniphilus_99                               |
| OTU_1043   | 7.39E-01 | 6.20E-01 | 5.33E-02 | 4.70 | 0.81 | Pantoea_beijingensis_88            | Bacteria_Proteobacteria_97_Gammaproteobacteria_97_Enterobacterales_97_Enterobacteriaceae_92_Pseudescherichia_92 |
| OTU_2844   | 7.07E-01 | 6.93E-01 | 8.49E-03 | 1.54 | 3.47 | Phascolarctobacterium_faecium_96   | Bacteria_Firmicutes_Negativicutes_Acidaminococcales_99_Acidaminococcaceae_99_Phascolarctobacterium_99           |
| OTU_778    | 7.07E-01 | 8.28E-01 | 1.14E-02 | 5.21 | 0.38 | Bacteroides_stercoris_100          | Bacteria_Bacteroidetes_84_Bacteroidia_84_Bacteroidales_84_Bacteroidaceae_84_Mediterranea_68                     |
| OTU_899    | 9.67E-01 | 9.18E-01 | 2.77E-02 | 1.36 | 3.89 | Enterocloster_lavalensis_92        | Bacteria_Firmicutes_Clostridia_Clostridiales_Lachnospiraceae_78_Clostridium_XIVa_24                             |
| OTU_1484   | 9.66E-01 | 6.04E-01 | 6.54E-03 | 4.83 | 1.35 | Roseburia_inulinivorans_96         | Bacteria_Firmicutes_Clostridia_Clostridiales_Lachnospiraceae_Roseburia_99                                       |
| OTU_1702   | 7.07E-01 | 6.04E-01 | 1.60E-02 | 3.77 | 0.63 | Bifidobacterium_longum_99          | Bacteria_Actinobacteria_75_Actinobacteria_75_Bifidobacteriales_75_Bifidobacteriaceae_75_Pseudoscardovia_34      |
| OTU_237    | 7.07E-01 | 9.94E-01 | 1.66E-01 | 5.87 | 0.82 | Anaerococcus_mediterraneensis_100  | Bacteria_Firmicutes_Clostridia_Clostridiales_Peptoniphilaceae_Anaerococcus_100                                  |
| OTU_2985   | 8.79E-01 | 6.78E-01 | 1.90E-03 | 3.90 | 1.40 | Bacteroides_faecis_89              | Bacteria_Bacteroidetes_52_Bacteroidia_52_Bacteroidales_52_Bacteroidaceae_43_Bacteroides_32                      |
| OTU_5247   | 9.09E-01 | 9.49E-01 | 1.10E-01 | 2.08 | 1.16 | Ruminococcus_gnavus_96             | Bacteria_Firmicutes_Clostridia_Clostridiales_Lachnospiraceae_Dorea_63                                           |
| OTU_6370   | 7.12E-01 | 7.24E-01 | 1.53E-03 | 4.03 | 1.49 | Roseburia_inulinivorans_97         | Bacteria_Firmicutes_Clostridia_Clostridiales_Lachnospiraceae_Roseburia_79                                       |
| OTU_1130   | 8.68E-01 | 9.35E-01 | 8.37E-04 | 3.27 | 0.96 | Pseudescherichia_vulneris_99       | Bacteria_Proteobacteria_95_Gammaproteobacteria_95_Enterobacterales_95_Enterobacteriaceae_95_Pseudescherichia_88 |
| OTU_129100 | NA       | 9.25E-01 | 2.38E-02 | 0.00 | 6.01 | Bacteroides_faecis_97              | Bacteria_Bacteroidetes_Bacteroidia_Bacteroidales_Bacteroidaceae_Bacteroides_100                                 |
| OTU_161    | NA       | 9.41E-01 | 7.64E-02 | 0.00 | 2.37 | Geobacter_sulfurreducens_87        | Bacteria_Proteobacteria_94_Deltaproteobacteria_84_Myxococcales_65_Nannocystineae_38_Koferiaceae_34_Koferia_34   |
| OTU_702    | 7.12E-01 | 6.04E-01 | 6.74E-02 | 0.45 | 3.31 | Enterococcus_faecalis_92           | Bacteria_Firmicutes_Bacilli_41_Lactobacillales_41_Carnobacteriaceae_39_Catelicoccus_35                          |
| OTU_823    | 7.07E-01 | 8.65E-01 | 2.51E-02 | 2.85 | 0.34 | Bacteroides_fragilis_100           | Bacteria_Bacteroidetes_Bacteroidia_Bacteroidales_Bacteroidaceae_93_Mediterranea_50                              |
| OTU_900    | 7.57E-01 | 9.54E-01 | 1.00E-01 | 0.99 | 1.93 | Blautia_schinkii_92                | Bacteria_Firmicutes_Clostridia_Clostridiales_Lachnospiraceae_Clostridium_XIVa_31                                |
| OTU_1054   | 8.61E-01 | 6.04E-01 | 1.21E-01 | 1.53 | 0.52 | Phocaeicola_plebeius_96            | Bacteria_Bacteroidetes_Bacteroidia_Bacteroidales_Bacteroidaceae_Phocaeicola_50                                  |



|           |          |          |          |      |      |                                   |                                                                                                                      |
|-----------|----------|----------|----------|------|------|-----------------------------------|----------------------------------------------------------------------------------------------------------------------|
| OTU_4739  | 7.07E-01 | 7.40E-01 | 6.48E-03 | 4.75 | 1.34 | Roseburia_inulinivorans_98        | Bacteria_Firmicutes_70_Clostridia_70_Clostridiales_70_Lachnospiraceae_70_Roseburia_36                                |
| OTU_53500 | 8.06E-01 | 6.76E-01 | 2.03E-01 | 1.70 | 2.38 | Enterococcus_faecalis_98          | Bacteria_Firmicutes_Bacilli_Lactobacillales_99_Enterococcaceae_98_Enterococcus_94                                    |
| OTU_667   | 7.82E-01 | 8.14E-01 | 8.25E-04 | 2.33 | 0.17 | Bifidobacterium_catenulatum_96    | Bacteria_Actinobacteria_Actinobacteria_Bifidobacteriales_Bifidobacteriaceae_Bifidobacterium_80                       |
| OTU_704   | 7.07E-01 | 9.89E-01 | 1.32E-02 | 1.94 | 0.26 | Bifidobacterium_stercoris_98      | Bacteria_Actinobacteria_90_Actinobacteria_90_Bifidobacteriales_90_Bifidobacteriaceae_90_Pseudoscardovia_44           |
| OTU_11756 | 9.38E-01 | 6.50E-01 | 3.83E-02 | 1.77 | 2.84 | Pseudescherichia_vulneris_92      | Bacteria_Proteobacteria_98_Gammaproteobacteria_98_Enterobacterales_98_Enterobacteriaceae_94_Pseudescherichia_92      |
| OTU_19483 | 7.57E-01 | 6.04E-01 | 2.46E-02 | 7.34 | 0.09 | Prevotella_copri_96               | Bacteria_Bacteroidetes_Bacteroidia_Bacteroidales_Prevotellaceae_Prevotella_98                                        |
| OTU_2831  | 7.07E-01 | 7.99E-01 | 3.21E-02 | 3.35 | 2.08 | Bacteroides_kribbi_96             | Bacteria_Bacteroidetes_Bacteroidia_Bacteroidales_Bacteroidaceae_Bacteroides_99                                       |
| OTU_6526  | 8.19E-01 | 9.12E-01 | 9.35E-03 | 3.49 | 1.06 | Streptococcus_gordonii_98         | Bacteria_Firmicutes_Bacilli_Lactobacillales_Streptococcaceae_Streptococcus_100                                       |
| OTU_723   | 8.89E-01 | 8.28E-01 | 7.47E-01 | 0.70 | 0.60 | Clostridium_perfringens_98        | Bacteria_Firmicutes_62_Clostridia_62_Clostridiales_62_Clostridiaceae_1_62_Desnuesiella_26                            |
| OTU_1403  | 7.07E-01 | 7.16E-01 | 3.25E-01 | 2.37 | 3.26 | Coprococcus_comes_97              | Bacteria_Firmicutes_Clostridia_Clostridiales_Lachnospiraceae_Bariatricus_71                                          |
| OTU_1438  | 1.00E+00 | 8.23E-01 | 1.74E-02 | 4.06 | 1.00 | Hungatella_effluvii_96            | Bacteria_Firmicutes_99_Clostridia_99_Clostridiales_99_Lachnospiraceae_99_Merdimonas_24                               |
| OTU_2195  | 1.00E+00 | 6.83E-01 | 2.48E-02 | 1.85 | 0.58 | Phocaeicola_vulgatus_100          | Bacteria_Bacteroidetes_88_Bacteroidia_88_Bacteroidales_88_Bacteroidaceae_88_Phocaeicola_69                           |
| OTU_611   | 8.23E-01 | 6.04E-01 | 2.43E-02 | 3.53 | 0.24 | Vallitalea_guaymasensis_87        | Bacteria_Firmicutes_92_Clostridia_91_Clostridiales_89_Ruminococcaceae_54_Pseudoclostridium_25                        |
| OTU_670   | 7.07E-01 | 6.04E-01 | 1.54E-01 | 3.19 | 0.19 | Streptococcus_salivarius_97       | Bacteria_Firmicutes_Bacilli_Lactobacillales_Streptococcaceae_Streptococcus_99                                        |
| OTU_1148  | 9.64E-01 | 9.53E-01 | 3.40E-02 | 1.34 | 3.51 | Mobilitalea_sibirica_89           | Bacteria_Bacteroidetes_82_Bacteroidia_82_Bacteroidales_82_Bacteroidaceae_82_Bacteroides_74                           |
| OTU_983   | 9.67E-01 | 8.83E-01 | 6.66E-04 | 4.70 | 0.70 | Oscillibacter_ruminantium_97      | Bacteria_Firmicutes_Clostridia_Clostridiales_Ruminococcaceae_Oscillibacter_93                                        |
| OTU_10637 | 7.07E-01 | 6.04E-01 | 1.83E-03 | 3.46 | 1.55 | Pseudescherichia_vulneris_97      | Bacteria_Proteobacteria_Gammaproteobacteria_Enterobacterales_Enterobacteriaceae_Escherichia/Shigella_74              |
| OTU_2290  | 1.00E+00 | 6.04E-01 | 1.35E-01 | 1.56 | 3.30 | Enterocloster_citroniae_98        | Bacteria_Firmicutes_Erysipelotrichia_51_Erysipelotrichales_51_Erysipelatoclostridiaceae_51_Erysipelatoclostridium_51 |
| OTU_3238  | 7.73E-01 | 7.73E-01 | 3.46E-02 | 2.31 | 3.55 | Bacteroides_thetaiotaomicron_93   | Bacteria_Bacteroidetes_97_Bacteroidia_97_Bacteroidales_97_Bacteroidaceae_97_Bacteroides_95                           |
| OTU_332   | 7.07E-01 | 6.04E-01 | 1.12E-01 | 5.22 | 0.57 | Eubacterium_siraeum_93            | Bacteria_Firmicutes_Clostridia_Clostridiales_Ruminococcaceae_98_Clostridium_IV_47                                    |
| OTU_584   | 7.07E-01 | 9.32E-01 | 8.88E-01 | 2.58 | 2.72 | Holdemania_filiformis_100         | Bacteria_Firmicutes_Erysipelotrichia_Erysipelotrichales_Erysipelotrichaceae_Holdemania_100                           |
| OTU_1379  | 8.25E-01 | 6.04E-01 | 9.20E-01 | 2.48 | 2.60 | Senegalimassilia_anaerobia_100    | Bacteria_Actinobacteria_Coriobacteriia_Coriobacteriales_Coriobacteriaceae_Senegalimassilia_100                       |
| OTU_1186  | 9.75E-01 | 9.35E-01 | 2.42E-02 | 1.58 | 3.90 | Paraclostridium_benzoelyticum_96  | Bacteria_Firmicutes_Clostridia_Clostridiales_Peptostreptococcaceae_Paraclostridium_98                                |
| OTU_1950  | 7.57E-01 | 9.25E-01 | 4.05E-02 | 1.46 | 3.68 | Romboutsia_sedimentorum_88        | Bacteria_Proteobacteria_95_Gammaproteobacteria_95_Enterobacterales_95_Enterobacteriaceae_94_Pseudescherichia_69      |
| OTU_2888  | 9.93E-01 | 9.70E-01 | 2.01E-03 | 1.53 | 3.71 | Phascolarctobacterium_faecium_97  | Bacteria_Firmicutes_Negativicutes_Acidaminococcales_Acidaminococcaceae_Phascolarctobacterium_100                     |
| OTU_33498 | 7.12E-01 | 6.04E-01 | 2.58E-01 | 2.71 | 1.80 | Pseudescherichia_vulneris_87      | Bacteria_Proteobacteria_86_Gammaproteobacteria_86_Enterobacterales_86_Enterobacteriaceae_86_Pseudescherichia_85      |
| OTU_718   | 7.07E-01 | 6.46E-01 | 5.39E-01 | 2.06 | 3.52 | Veillonella_dispar_96             | Bacteria_Firmicutes_Negativicutes_Veillonellales_Veillonellaceae_Veillonella_54                                      |
| OTU_792   | NA       | 6.27E-01 | 8.23E-02 | 0.00 | 4.40 | Methyloversatilis_universalis_93  | Bacteria_Proteobacteria_Gammaproteobacteria_53_Enterobacterales_52_Enterobacteriaceae_52_Pseudescherichia_43         |
| OTU_1331  | 9.86E-01 | 6.04E-01 | 3.40E-04 | 4.34 | 0.95 | Ruminococcus_gnavus_94            | Bacteria_Firmicutes_Clostridia_Clostridiales_Lachnospiraceae_97_Dorea_40                                             |
| OTU_5974  | 1.00E+00 | 8.83E-01 | 1.22E-01 | 0.83 | 3.54 | Ralstonia_pickettii_97            | Bacteria_Proteobacteria_Betaproteobacteria_Burkholderiales_Burkholderiaceae_Ralstonia_100                            |
| OTU_1124  | 7.57E-01 | 6.05E-01 | 1.35E-02 | 1.02 | 0.24 | Phocaeicola_massiliensis_97       | Bacteria_Bacteroidetes_Bacteroidia_Bacteroidales_Bacteroidaceae_Phocaeicola_99                                       |
| OTU_1516  | 7.89E-01 | 8.11E-01 | 4.10E-03 | 1.24 | 3.55 | Veillonella_dispar_91             | Bacteria_Firmicutes_86_Negativicutes_86_Veillonellales_82_Veillonellaceae_82_Veillonella_82                          |
| OTU_366   | 7.07E-01 | 6.04E-01 | 4.14E-01 | 3.02 | 1.69 | Kineothrix_allysoides_98          | Bacteria_Firmicutes_Clostridia_Clostridiales_Lachnospiraceae_Enterocloster_27                                        |
| OTU_5253  | 8.67E-01 | 6.05E-01 | 1.87E-02 | 3.14 | 0.79 | Flintibacter_butyricus_99         | Bacteria_Firmicutes_Clostridia_Clostridiales_Ruminococcaceae_Flintibacter_100                                        |
| OTU_855   | 7.07E-01 | 6.94E-01 | 4.03E-03 | 5.76 | 0.23 | Streptococcus_peroris_98          | Bacteria_Bacteroidetes_91_Bacteroidia_90_Bacteroidales_90_Bacteroidaceae_76_Mediterranea_67                          |
| OTU_1039  | 8.06E-01 | 6.04E-01 | 1.46E-01 | 0.90 | 0.40 | Phocaeicola_vulgatus_94           | Bacteria_Bacteroidetes_Bacteroidia_Bacteroidales_Bacteroidaceae_Phocaeicola_100                                      |
| OTU_26852 | 9.87E-01 | 9.61E-01 | 6.63E-02 | 0.73 | 0.32 | Bacteroides_caecimuris_94         | Bacteria_Bacteroidetes_Bacteroidia_Bacteroidales_Bacteroidaceae_Bacteroides_96                                       |
| OTU_15569 | 8.82E-01 | 9.46E-01 | 8.33E-01 | 1.97 | 2.10 | Phocaeicola_plebeius_97           | Bacteria_Bacteroidetes_Bacteroidia_Bacteroidales_Bacteroidaceae_Phocaeicola_67                                       |
| OTU_18074 | 9.78E-01 | 9.75E-01 | 2.69E-01 | 2.63 | 2.01 | Enterocloster_citroniae_97        | Bacteria_Firmicutes_Clostridia_Clostridiales_Lachnospiraceae_Enterocloster_66                                        |
| OTU_25764 | 8.06E-01 | 8.99E-01 | 4.68E-01 | 2.12 | 2.54 | Enterococcus_faecalis_97          | Bacteria_Firmicutes_Bacilli_Lactobacillales_Enterococcaceae_82_Enterococcus_45                                       |
| OTU_357   | 7.57E-01 | 8.65E-01 | 2.50E-01 | 1.42 | 0.57 | Mitsuokella_multacida_98          | Bacteria_Firmicutes_Negativicutes_Selenomonadales_Selenomonadaceae_Mitsuokella_100                                   |
| OTU_849   | 7.85E-01 | 9.42E-01 | 3.57E-01 | 2.94 | 2.10 | Paraclostridium_benzoelyticum_94  | Bacteria_Firmicutes_Clostridia_Clostridiales_Peptostreptococcaceae_96_Paraclostridium_96                             |
| OTU_87577 | 9.67E-01 | 9.12E-01 | 9.08E-03 | 4.15 | 0.41 | Streptococcus_mitis_98            | Bacteria_Firmicutes_Bacilli_Lactobacillales_Streptococcaceae_Streptococcus_100                                       |
| OTU_2177  | 7.91E-01 | 6.63E-01 | 7.06E-01 | 2.48 | 2.91 | Veillonella_parvula_90            | Bacteria_Firmicutes_Clostridia_98_Clostridiales_98_Lachnospiraceae_98_Bariatricus_78                                 |
| OTU_2803  | 7.46E-01 | 7.36E-01 | 4.74E-02 | 1.54 | 3.06 | Enterococcus_hirae_96             | Bacteria_Firmicutes_Bacilli_91_Lactobacillales_91_Enterococcaceae_74_Vagococcus_20                                   |
| OTU_6606  | 7.12E-01 | 8.59E-01 | 2.16E-01 | 2.04 | 2.69 | Pseudescherichia_vulneris_100     | Bacteria_Proteobacteria_Gammaproteobacteria_Enterobacterales_Enterobacteriaceae_99_Pseudescherichia_88               |
| OTU_4643  | 7.94E-01 | 7.06E-01 | 5.78E-02 | 2.20 | 0.43 | Bacteroides_uniformis_97          | Bacteria_Bacteroidetes_Bacteroidia_Bacteroidales_Bacteroidaceae_Bacteroides_54                                       |
| OTU_7189  | 9.59E-01 | 9.17E-01 | 3.61E-03 | 0.25 | 4.62 | Phocaeicola_plebeius_96           | Bacteria_Bacteroidetes_Bacteroidia_Bacteroidales_Bacteroidaceae_Phocaeicola_84                                       |
| OTU_14508 | 7.85E-01 | 6.99E-01 | 4.58E-01 | 2.28 | 2.60 | Enterocloster_clostridioformis_97 | Bacteria_Firmicutes_Clostridia_Clostridiales_Lachnospiraceae_Enterocloster_65                                        |
| OTU_1570  | 7.57E-01 | 9.17E-01 | 3.28E-01 | 2.85 | 2.18 | Veillonella_parvula_96            | Bacteria_Firmicutes_Negativicutes_Veillonellales_Veillonellaceae_Veillonella_100                                     |
| OTU_1869  | 8.25E-01 | 6.61E-01 | 2.25E-03 | 3.98 | 0.63 | Shigella_dysenteriae_88           | Bacteria_Proteobacteria_84_Gammaproteobacteria_84_Enterobacterales_81_Enterobacteriaceae_79_Pseudescherichia_78      |
| OTU_2148  | 7.07E-01 | 7.31E-01 | 7.08E-01 | 0.26 | 0.43 | Haemophilus_parainfluenzae_98     | Bacteria_Proteobacteria_Gammaproteobacteria_Pasteurellales_Pasteurellaceae_Haemophilus_99                            |
| OTU_7544  | 7.07E-01 | 6.04E-01 | 4.81E-09 | 4.79 | 0.44 | Bacteroides_kribbi_96             | Bacteria_Bacteroidetes_Bacteroidia_Bacteroidales_Bacteroidaceae_97_Bacteroides_97                                    |
| OTU_4649  | 7.88E-01 | 7.88E-01 | 3.28E-04 | 1.89 | 0.23 | Phocaeicola_vulgatus_96           | Bacteria_Bacteroidetes_Bacteroidia_Bacteroidales_Bacteroidaceae_Phocaeicola_61                                       |
| OTU_619   | 7.39E-01 | 7.30E-01 | 1.50E-02 | 5.28 | 0.26 | Clostridium_perfringens_91        | Bacteria_Firmicutes_81_Clostridia_81_Clostridiales_81_Clostridiaceae_1_80_Sarcina_32                                 |
| OTU_1150  | 9.67E-01 | 6.04E-01 | 6.80E-02 | 0.75 | 2.28 | Enterococcus_faecalis_93          | Bacteria_Firmicutes_Bacilli_91_Lactobacillales_88_Carnobacteriaceae_49_Catellibacterium_23                           |
| OTU_12605 | 8.60E-01 | 9.70E-01 | 9.34E-01 | 2.22 | 2.18 | Lachnoclostridium_pacaense_97     | Bacteria_Firmicutes_Clostridia_Clostridiales_Lachnospiraceae_Enterocloster_39                                        |
| OTU_2085  | 9.87E-01 | 6.04E-01 | 5.02E-01 | 0.55 | 0.38 | Alistipes_shahii_100              | Bacteria_Bacteroidetes_Bacteroidia_Bacteroidales_Rikenellaceae_Alistipes_100                                         |
| OTU_22668 | 7.14E-01 | 7.07E-01 | 2.63E-01 | 2.09 | 2.91 | Veillonella_tobetsuensis_99       | Bacteria_Firmicutes_Negativicutes_Veillonellales_Veillonellaceae_Veillonella_100                                     |
| OTU_3019  | 7.62E-01 | 6.47E-01 | 5.16E-02 | 3.31 | 1.44 | Vagococcus_humatus_90             | Bacteria_Firmicutes_Negativicutes_Selenomonadales_48_Sporomusaceae_47_Anaerobaculum_44                               |
| OTU_4087  | 7.80E-01 | 6.63E-01 | 7.87E-02 | 1.30 | 3.39 | Pseudescherichia_vulneris_97      | Bacteria_Proteobacteria_Gammaproteobacteria_Enterobacterales_Enterobacteriaceae_Escherichia/Shigella_62              |
| OTU_72010 | 7.07E-01 | 6.24E-01 | 1.43E-01 | 1.13 | 0.25 | Faecalibacterium_prausnitzii_98   | Bacteria_Firmicutes_Clostridia_Clostridiales_Ruminococcaceae_Faecalibacterium_100                                    |
| OTU_2707  | 8.06E-01 | 7.30E-01 | 7.92E-02 | 2.93 | 1.80 | Clostridium_symbiosum_96          | Bacteria_Firmicutes_Clostridia_Clostridiales_Lachnospiraceae_Clostridium_XIVa_58                                     |
| OTU_35794 | 7.57E-01 | 9.17E-01 | 5.79E-05 | 1.05 | 4.01 | Bacteroides_thetaiotaomicron_100  | Bacteria_Bacteroidetes_80_Bacteroidia_80_Bacteroidales_80_Bacteroidaceae_80_Mediterranea_47                          |
| OTU_40831 | 8.06E-01 | 9.34E-01 | 3.67E-04 | 5.30 | 0.28 | Bacteroides_xylanisolvens_97      | Bacteria_Bacteroidetes_Bacteroidia_Bacteroidales_Bacteroidaceae_Bacteroides_100                                      |
| OTU_41756 | 8.06E-01 | 6.10E-01 | 3.11E-02 | 4.38 | 0.34 | Veillonella_parvula_98            | Bacteria_Firmicutes_Negativicutes_Veillonellales_Veillonellaceae_Veillonella_100                                     |
| OTU_10023 | 7.10E-01 | 6.05E-01 | 5.47E-01 | 2.59 | 1.26 | Citrobacter_koseri_98             | Bacteria_Proteobacteria_Gammaproteobacteria_Enterobacterales_Enterobacteriaceae_Cronobacter_44                       |

|           |          |          |          |      |      |                                     |                                                                                                                 |
|-----------|----------|----------|----------|------|------|-------------------------------------|-----------------------------------------------------------------------------------------------------------------|
| OTU_1385  | 1.00E+00 | 6.96E-01 | 1.08E-04 | 3.56 | 0.69 | Parabacteroides_distasonis_98       | Bacteria_Proteobacteria_56_Gammaproteobacteria_56_Enterobacterales_56_Enterobacteriaceae_56_Pseudescherichia_56 |
| OTU_29627 | 7.59E-01 | 6.04E-01 | 1.06E-01 | 3.04 | 1.36 | Veillonella_tobetsuensis_98         | Bacteria_Firmicutes_Negativicutes_Veillonellales_Veillonellaceae_Veillonella_100                                |
| OTU_638   | 7.07E-01 | 7.36E-01 | 7.45E-01 | 0.89 | 0.75 | Klebsiella_pneumoniae_98            | Bacteria_Proteobacteria_92_Gammaproteobacteria_92_Enterobacterales_90_Enterobacteriaceae_89_Leclercia_52        |
| OTU_6492  | 9.14E-01 | 7.21E-01 | 9.42E-01 | 1.96 | 2.01 | Enterocloster_clostridioformis_96   | Bacteria_Firmicutes_Clostridia_Clostridiales_Lachnospiraceae_Clostridium_XIVa_61                                |
| OTU_2250  | 9.73E-01 | 8.62E-01 | 2.41E-02 | 2.12 | 3.31 | Roseburia_inulinivorans_94          | Bacteria_Firmicutes_99_Clostridia_99_Clostridiales_99_Lachnospiraceae_99_Falcatimonas_17                        |
| OTU_1400  | 8.97E-01 | 9.35E-01 | 1.07E-02 | 0.61 | 3.89 | Clostridium_symbiosum_96            | Bacteria_Firmicutes_Negativicutes_44_Acidaminococcales_43_Acidaminococcaceae_43_Phascolartobacterium_43         |
| OTU_9775  | 8.57E-01 | 9.32E-01 | 9.58E-04 | 1.43 | 2.83 | Escherichia_albertii_90             | Bacteria_Proteobacteria_86_Gammaproteobacteria_86_Enterobacterales_86_Enterobacteriaceae_86_Pseudescherichia_84 |
| OTU_1166  | 9.43E-01 | 6.04E-01 | 9.16E-02 | 2.44 | 1.46 | Pseudescherichia_vulneris_93        | Bacteria_Proteobacteria_70_Gammaproteobacteria_70_Enterobacterales_70_Enterobacteriaceae_69_Pseudescherichia_66 |
| OTU_2455  | 8.97E-01 | 8.62E-01 | 7.31E-01 | 2.01 | 1.80 | Falcatimonas_natans_91              | Bacteria_Firmicutes_Clostridia_76_Clostridiales_76_Lachnospiraceae_76_Eisenbergiella_14                         |
| OTU_2461  | 9.66E-01 | 9.53E-01 | 1.72E-02 | 2.75 | 1.57 | Pseudescherichia_vulneris_96        | Bacteria_Proteobacteria_86_Gammaproteobacteria_86_Enterobacterales_86_Enterobacteriaceae_86_Pseudescherichia_80 |
| OTU_608   | 8.25E-01 | 6.04E-01 | 2.70E-02 | 3.52 | 0.24 | Vallitalea_pronyensis_86            | Bacteria_Firmicutes_99_Clostridia_90_Clostridiales_85_Clostridiales_Incertae_Sedis_XIII_14_Anaerovorax_13       |
| OTU_3583  | 8.32E-01 | 9.75E-01 | 3.15E-03 | 3.79 | 0.63 | Veillonella_dispar_89               | Bacteria_Firmicutes_91_Negativicutes_83_Veillonellales_67_Veillonellaceae_67_Veillonella_65                     |
| OTU_480   | 7.57E-01 | 6.14E-01 | 2.13E-01 | 3.85 | 1.14 | Oscillibacter_ruminantium_94        | Bacteria_Firmicutes_Clostridia_Clostridiales_Ruminococcaceae_Oscillibacter_58                                   |
| OTU_967   | 7.07E-01 | 6.04E-01 | 1.40E-02 | 1.26 | 3.68 | Bacteroides_thetaiotaomicron_100    | Bacteroides_73_Bacteroidia_73_Bacteroidales_73_Bacteroidaceae_73_Bacteroides_62                                 |
| OTU_2259  | 7.07E-01 | 6.16E-01 | 2.97E-02 | 0.62 | 3.44 | Bacteroides_kribbi_96               | Bacteria_Bacteroidetes_Bacteroidia_Bacteroidales_Bacteroidaceae_Bacteroides_95                                  |
| OTU_589   | 9.67E-01 | 7.80E-01 | 8.70E-01 | 0.32 | 0.27 | Bacteroides_gallinaceum_93          | Bacteria_Bacteroidetes_Bacteroidia_Bacteroidales_Bacteroidaceae_Phocaicola_76                                   |
| OTU_592   | 7.97E-01 | 9.59E-01 | 4.45E-02 | 4.28 | 1.01 | Clostridium_carnis_90               | Bacteria_Proteobacteria_59_Betaproteobacteria_58_Burkholderiales_56_Sutterellaceae_53_Sutterella_50             |
| OTU_949   | 9.72E-01 | 6.41E-01 | 3.82E-03 | 3.30 | 0.14 | Acidaminococcus_intestini_92        | Bacteria_Firmicutes_Negativicutes_Acidaminococcales_Acidaminococcaceae_Phascolartobacterium_99                  |
| OTU_959   | 8.33E-01 | 6.04E-01 | 8.43E-01 | 1.03 | 1.15 | Faecalibacterium_prausnitzii_97     | Bacteria_Firmicutes_Clostridia_Clostridiales_Ruminococcaceae_Faecalibacterium_98                                |
| OTU_9739  | 8.48E-01 | 9.12E-01 | 6.24E-03 | 1.32 | 2.41 | Pseudescherichia_vulneris_95        | Bacteria_Proteobacteria_Gammaproteobacteria_Enterobacterales_Enterobacteriaceae_Pseudescherichia_64             |
| OTU_16000 | 1.00E+00 | 6.04E-01 | 2.37E-02 | 1.92 | 0.24 | Bacteroides_stercoris_93            | Bacteria_Bacteroidetes_Bacteroidia_Bacteroidales_Bacteroidaceae_Phocaicola_97                                   |
| OTU_3990  | 1.00E+00 | 7.97E-01 | 2.59E-02 | 2.54 | 1.55 | Enterocloster_asparagiformis_89     | Bacteria_Proteobacteria_71_Gammaproteobacteria_71_Enterobacterales_71_Enterobacteriaceae_70_Pseudescherichia_66 |
| OTU_719   | 7.57E-01 | 6.04E-01 | 7.26E-01 | 2.31 | 1.96 | Peptoniphilus_grossensis_96         | Bacteria_Firmicutes_Clostridia_Clostridiales_Peptoniphilaceae_Peptoniphilus_100                                 |
| OTU_7247  | 7.91E-01 | 6.50E-01 | 3.53E-02 | 3.68 | 1.36 | Roseburia_inulinivorans_91          | Bacteria_Firmicutes_Clostridia_63_Clostridiales_63_Lachnospiraceae_62_Bariatricus_14                            |
| OTU_13609 | 8.85E-01 | 6.04E-01 | 1.10E-01 | 2.93 | 2.05 | Pseudescherichia_vulneris_100       | Bacteria_Proteobacteria_99_Gammaproteobacteria_99_Enterobacterales_99_Enterobacteriaceae_99_Pseudescherichia_80 |
| OTU_954   | 7.12E-01 | 6.15E-01 | 6.49E-03 | 4.45 | 0.87 | Clostridium_symbiosum_95            | Bacteria_Bacteroidetes_64_Bacteroidia_63_Bacteroidales_63_Bacteroidaceae_61_Mediterranea_39                     |
| OTU_1597  | 8.48E-01 | 6.72E-01 | 8.52E-02 | 2.68 | 1.83 | Coprococcus_comes_96                | Bacteria_Firmicutes_Clostridia_Clostridiales_Lachnospiraceae_Bariatricus_79                                     |
| OTU_352   | 7.62E-01 | 6.04E-01 | 6.96E-01 | 0.71 | 0.57 | Sutterella_stercoricanis_98         | Bacteria_Proteobacteria_Betaproteobacteria_Burkholderiales_Sutterellaceae_Sutterella_100                        |
| OTU_51294 | 9.05E-01 | 9.97E-01 | 1.30E-03 | 3.18 | 0.50 | Parabacteroides_distasonis_95       | Bacteria_Bacteroidetes_Bacteroidia_Bacteroidales_Porphyromonadaceae_90_Parabacteroides_90                       |
| OTU_596   | 8.25E-01 | 9.09E-01 | 4.87E-02 | 0.89 | 0.20 | Sutterella_wadsworthensis_97        | Bacteria_Proteobacteria_Betaproteobacteria_Burkholderiales_Sutterellaceae_Sutterella_100                        |
| OTU_652   | 7.45E-01 | 6.05E-01 | 1.09E-01 | 3.25 | 1.00 | Fusobacterium_mortiferum_92         | Bacteria_Fusobacteria_Fusobacteriia_Fusobacteriales_Fusobacteriaceae_91_Cetobacterium_53                        |
| OTU_875   | 7.82E-01 | 6.04E-01 | 9.84E-01 | 2.00 | 2.01 | Lacrimispora_xylanolytica_97        | Bacteria_Firmicutes_Clostridia_Clostridiales_Lachnospiraceae_Ruminococcus2_19                                   |
| OTU_782   | 7.39E-01 | 6.63E-01 | 7.60E-02 | 0.54 | 2.17 | Phocaicola_plebeius_97              | Bacteria_Bacteroidetes_84_Bacteroidia_84_Bacteroidales_84_Bacteroidaceae_84_Phocaicola_75                       |
| OTU_902   | 7.10E-01 | 6.14E-01 | 6.82E-01 | 1.88 | 2.27 | Pseudescherichia_vulneris_97        | Bacteria_Proteobacteria_Gammaproteobacteria_Enterobacterales_Enterobacteriaceae_Escherichia/Shigella_78         |
| OTU_11321 | 9.59E-01 | 9.81E-01 | 6.77E-04 | 4.00 | 0.44 | Bacteroides_caccae_97               | Bacteria_Bacteroidetes_Bacteroidia_Bacteroidales_Bacteroidaceae_Bacteroides_100                                 |
| OTU_1345  | 7.07E-01 | 6.04E-01 | 4.37E-01 | 1.63 | 2.87 | Dialister_propionificiens_93        | Bacteria_Firmicutes_Negativicutes_Veillonellales_99_Veillonellaceae_99_Dialister_98                             |
| OTU_1406  | 7.46E-01 | 6.72E-01 | 8.33E-01 | 2.10 | 1.94 | Clostridium_perfringens_100         | Bacteria_Firmicutes_84_Clostridia_84_Clostridiales_84_Clostridiaceae_1_84_Desnuesiella_37                       |
| OTU_1455  | 7.07E-01 | 6.04E-01 | 5.64E-01 | 1.54 | 2.10 | Dialister_propionificiens_97        | Bacteria_Firmicutes_Negativicutes_70_Veillonellales_70_Veillonellaceae_70_Dialister_69                          |
| OTU_1475  | 8.48E-01 | 6.04E-01 | 2.32E-02 | 1.26 | 3.27 | Enterococcus_faecalis_95            | Bacteria_Firmicutes_99_Bacilli_87_Lactobacillales_82_Enterococcaceae_51_Melissococcus_23                        |
| OTU_1954  | 9.37E-01 | 8.38E-01 | 6.72E-01 | 0.98 | 0.79 | Blautia_wexlerae_96                 | Bacteria_Firmicutes_Clostridia_Clostridiales_Lachnospiraceae_Clostridium_XIVa_26                                |
| OTU_2156  | 7.52E-01 | 6.04E-01 | 6.54E-02 | 3.88 | 0.33 | Roseburia_inulinivorans_90          | Bacteria_Firmicutes_Clostridia_86_Clostridiales_86_Lachnospiraceae_85_Bariatricus_36                            |
| OTU_7427  | 8.16E-01 | 6.04E-01 | 1.47E-01 | 2.48 | 1.72 | Clostridium_perfringens_97          | Bacteria_Firmicutes_Clostridia_Clostridiales_Clostridiaceae_1_90_Sarcina_32                                     |
| OTU_961   | 7.10E-01 | 8.28E-01 | 3.57E-01 | 0.05 | 0.12 | Bifidobacterium_callitrichidarum_90 | Bacteria_Actinobacteria_98_Actinobacteria_98_Bifidobacteriales_96_Bifidobacteriaceae_96_Neoscardovia_46         |
| OTU_14132 | 8.49E-01 | 6.05E-01 | 2.07E-01 | 2.83 | 2.01 | Hungatella_effluvii_95              | Bacteria_Firmicutes_84_Clostridia_84_Clostridiales_84_Lachnospiraceae_84_Merdimonas_24                          |
| OTU_925   | 7.07E-01 | 6.04E-01 | 3.03E-01 | 1.48 | 2.38 | Clostridium_perfringens_97          | Bacteria_Firmicutes_Clostridia_99_Clostridiales_99_Clostridiaceae_1_79_Clostridium_sensu_stricto_61             |
| OTU_1132  | 1.00E+00 | 6.76E-01 | 2.79E-03 | 4.46 | 0.39 | Clostridium_perfringens_92          | Bacteria_Firmicutes_Clostridia_Clostridiales_Lachnospiraceae_56_Abyssivirga_20                                  |
| OTU_18083 | 9.23E-01 | 9.72E-01 | 3.68E-01 | 2.31 | 1.92 | Clostridium_symbiosum_96            | Bacteria_Firmicutes_Clostridia_Clostridiales_Lachnospiraceae_Clostridium_XIVa_43                                |
| OTU_2301  | 9.99E-01 | 6.63E-01 | 3.27E-02 | 0.96 | 2.87 | Drancourtella_massiliensis_98       | Bacteria_Firmicutes_98_Clostridia_98_Clostridiales_98_Lachnospiraceae_98_Sellimonas_98                          |
| OTU_2889  | 7.07E-01 | 4.60E-01 | 1.68E-02 | 3.43 | 1.54 | Clostridium_scindens_94             | Bacteria_Firmicutes_Clostridia_Clostridiales_Lachnospiraceae_90_Clostridium_XIVa_70                             |
| OTU_3192  | 7.07E-01 | 9.35E-01 | 9.32E-01 | 1.13 | 1.08 | Faecalibacterium_prausnitzii_97     | Bacteria_Firmicutes_Clostridia_Clostridiales_Ruminococcaceae_Faecalibacterium_82                                |
| OTU_4755  | 9.06E-01 | 8.13E-01 | 1.81E-01 | 2.90 | 2.01 | Clostridium_symbiosum_94            | Bacteria_Firmicutes_Clostridia_Clostridiales_Lachnospiraceae_Coprococcus_52                                     |
| OTU_1785  | 8.83E-01 | 9.18E-01 | 3.36E-03 | 0.88 | 4.67 | Phocaicola_coprocola_95             | Bacteria_Bacteroidetes_Bacteroidia_Bacteroidales_Bacteroidaceae_Bacteroides_74                                  |
| OTU_3501  | 9.38E-01 | 9.76E-01 | 5.55E-01 | 2.70 | 2.37 | Roseburia_inulinivorans_97          | Bacteria_Firmicutes_Clostridia_Clostridiales_Lachnospiraceae_Roseburia_66                                       |
| OTU_64956 | 7.07E-01 | 6.04E-01 | 6.54E-01 | 0.92 | 1.20 | Veillonella_denticariosi_98         | Bacteria_Firmicutes_Negativicutes_Veillonellales_Veillonellaceae_Veillonella_100                                |
| OTU_8089  | 9.64E-01 | 6.37E-01 | 2.63E-02 | 2.78 | 1.29 | Enterocloster_citroniae_96          | Bacteria_Firmicutes_Clostridia_Clostridiales_Lachnospiraceae_Enterocloster_65                                   |
| OTU_10673 | 9.43E-01 | 6.82E-01 | 8.10E-03 | 2.75 | 1.53 | Hungatella_effluvii_97              | Bacteria_Firmicutes_Clostridia_Clostridiales_Lachnospiraceae_Hungatella_80                                      |
| OTU_2136  | 7.91E-01 | 8.65E-01 | 4.17E-01 | 2.20 | 1.76 | Shigella_boydii_89                  | Bacteria_Proteobacteria_Gammaproteobacteria_Enterobacterales_Enterobacteriaceae_Pseudescherichia_85             |
| OTU_586   | 7.46E-01 | 6.04E-01 | 8.59E-02 | 3.63 | 1.12 | Enterococcus_dispar_98              | Bacteria_Firmicutes_57_Bacilli_56_Lactobacillales_53_Carnobacteriaceae_46_Isobaculum_37                         |
| OTU_691   | 1.00E+00 | 6.04E-01 | 3.03E-01 | 0.87 | 0.45 | Catenibacterium_mitsuokai_96        | Bacteria_Firmicutes_Erysipelotrichia_92_Erysipelotrichales_92_Erysipelotrichaceae_92_Catenibacterium_69         |
| OTU_775   | 7.07E-01 | 7.99E-01 | 1.64E-02 | 0.38 | 1.43 | Phocaicola_coprophilus_99           | Bacteria_Bacteroidetes_88_Bacteroidia_88_Bacteroidales_88_Bacteroidaceae_88_Phocaicola_62                       |
| OTU_1437  | 7.46E-01 | 9.64E-01 | 5.25E-03 | 4.53 | 0.26 | Bacteroides_uniformis_95            | Bacteria_Bacteroidetes_Bacteroidia_Bacteroidales_Bacteroidaceae_80_Bacteroides_77                               |
| OTU_386   | 9.14E-01 | 9.32E-01 | 9.68E-01 | 0.79 | 0.81 | Veillonella_dispar_98               | Bacteria_Firmicutes_Negativicutes_76_Veillonellales_65_Veillonellaceae_65_Veillonella_62                        |
| OTU_4100  | 7.07E-01 | 9.46E-01 | 3.33E-01 | 3.05 | 1.60 | Veillonella_atypica_96              | Bacteria_Firmicutes_Negativicutes_Veillonellales_Veillonellaceae_Veillonella_99                                 |
| OTU_468   | 9.87E-01 | 9.77E-01 | 3.36E-03 | 4.60 | 0.30 | Clostridium_perfringens_95          | Bacteria_Firmicutes_Clostridia_Clostridiales_Clostridiaceae_1_82_Sarcina_43                                     |
| OTU_8745  | 8.06E-01 | 6.72E-01 | 6.72E-01 | 2.39 | 2.10 | Ruminococcus_torques_97             | Bacteria_Firmicutes_Clostridia_Clostridiales_Lachnospiraceae_Mediterraneibacter_78                              |
| OTU_903   | 9.31E-01 | 7.58E-01 | 2.23E-01 | 1.49 | 2.30 | Enterococcus_faecalis_90            | Bacteria_Firmicutes_Bacilli_40_Lactobacillales_39_Carnobacteriaceae_36_Catellibacillus_36                       |
| OTU_1555  | 9.43E-01 | 8.14E-01 | 1.82E-01 | 2.29 | 1.65 | Enterococcus_hirae_96               | Bacteria_Firmicutes_99_Bacilli_98_Lactobacillales_98_Enterococcaceae_90_Vagococcus_40                           |



|            |          |          |          |      |      |                                       |                                                                                                                      |
|------------|----------|----------|----------|------|------|---------------------------------------|----------------------------------------------------------------------------------------------------------------------|
| OTU_294    | 9.56E-01 | 9.46E-01 | 8.04E-01 | 0.22 | 0.26 | Haemophilus_parainfluenzae_90         | Bacteria_Proteobacteria_Gammaproteobacteria_Pasteurellales_Pasteurellaceae_Conservatibacter_55                       |
| OTU_764    | 7.07E-01 | 6.10E-01 | 9.89E-02 | 1.02 | 2.82 | Clostridium_symbiosum_92              | Bacteria_Firmicutes_Clostridia_Clostridiales_Lachnospiraceae_78_Clostridium_XIVa_46                                  |
| OTU_877    | 8.44E-01 | 9.17E-01 | 5.52E-03 | 0.45 | 1.18 | Enterococcus_dispar_97                | Bacteria_Firmicutes_59_Bacilli_59_Lactobacillales_56_Carnobacteriaceae_54_Isobaculum_44                              |
| OTU_4206   | 7.23E-01 | 9.19E-01 | 3.81E-02 | 3.02 | 1.66 | Coprococcus_comes_98                  | Bacteria_Firmicutes_94_Clostridia_94_Clostridiales_94_Lachnospiraceae_94_Bariatricus_62                              |
| OTU_4601   | 9.04E-01 | 6.04E-01 | 5.05E-01 | 0.48 | 0.67 | Fusicatenibacter_saccharivorans_95    | Bacteria_Firmicutes_Clostridia_Clostridiales_Lachnospiraceae_Coprococcus_17                                          |
| OTU_835    | 7.07E-01 | 6.04E-01 | 5.81E-01 | 2.60 | 1.97 | Paraclostridium_benzoelyticum_94      | Bacteria_Firmicutes_Clostridia_Clostridiales_Peptostreptococcaceae_98_Paraclostridium_98                             |
| OTU_1748   | 7.10E-01 | 9.54E-01 | 1.31E-01 | 2.67 | 1.41 | Coprococcus_comes_92                  | Bacteria_Firmicutes_97_Clostridia_97_Clostridiales_97_Lachnospiraceae_97_Bariatricus_72                              |
| OTU_503    | 7.07E-01 | 8.65E-01 | 1.84E-01 | 3.86 | 0.17 | Fusobacterium_mortiferum_96           | Bacteria_Fusobacteria_Fusobacteriia_Fusobacteriales_Fusobacteriaceae_99_Cetobacterium_70                             |
| OTU_34033  | 7.59E-01 | 6.65E-01 | 6.92E-02 | 1.07 | 1.86 | Enterococcus_faecalis_98              | Bacteria_Firmicutes_Bacilli_Lactobacillales_99_Enterococcaceae_97_Enterococcus_68                                    |
| OTU_448    | 7.07E-01 | 6.05E-01 | 2.32E-02 | 2.75 | 0.89 | Adlercreutzia_equolifaciens_100       | Bacteria_Actinobacteria_Coribacteriia_Eggerthellales_Eggerthellaceae_Adlercreutzia_100                               |
| OTU_469    | 9.99E-01 | 9.62E-01 | 6.04E-03 | 1.85 | 0.21 | Megasphaera_elsdenii_90               | Bacteria_Firmicutes_68_Negativicutes_68_Veillonellales_68_Veillonellaceae_68_Megasphaera_64                          |
| OTU_104221 | 7.07E-01 | 6.74E-01 | 6.29E-01 | 2.73 | 1.58 | Veillonella_tobetsuensis_98           | Bacteria_Firmicutes_Negativicutes_Veillonellales_Veillonellaceae_Veillonella_100                                     |
| OTU_662    | 7.07E-01 | 9.18E-01 | 1.87E-01 | 2.19 | 0.34 | Phocaeicola_vulgatus_100              | Bacteria_Bacteroidetes_Bacteroidia_Bacteroidales_Bacteroidaceae_Phocaeicola_95                                       |
| OTU_8109   | 7.93E-01 | 9.35E-01 | 8.20E-02 | 1.01 | 2.29 | Lachnodostridium_pacaense_94          | Bacteria_Firmicutes_Clostridia_Clostridiales_Lachnospiraceae_Clostridium_XIVa_39                                     |
| OTU_1188   | 7.57E-01 | 8.10E-01 | 3.34E-02 | 1.09 | 3.58 | Paraclostridium_bifermentans_98       | Bacteria_Firmicutes_Clostridia_Clostridiales_Peptostreptococcaceae_Paraclostridium_98                                |
| OTU_1499   | 7.10E-01 | 8.14E-01 | 5.88E-01 | 2.35 | 1.98 | Clostridium_scindens_95               | Bacteria_Firmicutes_Clostridia_Clostridiales_Lachnospiraceae_Clostridium_XIVa_87                                     |
| OTU_18446  | 8.25E-01 | 9.90E-01 | 5.96E-02 | 1.75 | 2.42 | Escherichia_albertii_88               | Bacteria_Proteobacteria_60_Gammaproteobacteria_60_Enterobacterales_60_Enterobacteriaceae_60_Pseudescerichia_60       |
| OTU_2127   | 9.45E-01 | 9.28E-01 | 8.38E-05 | 0.72 | 4.03 | Bacteroides_thetaiotaomicron_96       | Bacteria_Bacteroidetes_Bacteroidia_Bacteroidales_Bacteroidaceae_Bacteroides_93                                       |
| OTU_2206   | 7.73E-01 | 7.73E-01 | 2.80E-02 | 2.26 | 0.86 | Dorea_longicatena_96                  | Bacteria_Firmicutes_Clostridia_Clostridiales_Lachnospiraceae_Dorea_91                                                |
| OTU_331    | 8.85E-01 | 6.04E-01 | 9.64E-03 | 4.36 | 0.18 | Desulfovibrio_intestinalis_96         | Bacteria_Proteobacteria_Deltaproteobacteria_Desulfobibrionales_Desulfobibrionaceae_97_Desulfovibrio_75               |
| OTU_7220   | 9.31E-01 | 6.05E-01 | 7.76E-01 | 1.91 | 1.68 | Acidaminococcus_fermentans_95         | Bacteria_Firmicutes_Negativicutes_Acidaminococcales_Acidaminococcaceae_Acidaminococcus_100                           |
| OTU_726    | 7.59E-01 | 7.66E-01 | 5.83E-02 | 4.69 | 0.42 | Roseburia_inulinivorans_96            | Bacteria_Firmicutes_Clostridia_Clostridiales_Lachnospiraceae_Roseburia_76                                            |
| OTU_7542   | 7.57E-01 | 8.60E-01 | 1.89E-06 | 1.08 | 3.60 | Bacteroides_thetaiotaomicron_90       | Bacteria_Proteobacteria_38_Gammaproteobacteria_38_Enterobacterales_38_Enterobacteriaceae_38_Pseudescerichia_38       |
| OTU_79802  | 7.10E-01 | 6.04E-01 | 8.03E-01 | 1.96 | 2.18 | Veillonella_parvula_98                | Bacteria_Firmicutes_Negativicutes_Veillonellales_Veillonellaceae_Veillonella_100                                     |
| OTU_1835   | 7.85E-01 | 6.66E-01 | 3.81E-01 | 1.75 | 2.13 | Enterocloster_clostridioformis_95     | Bacteria_Firmicutes_Clostridia_Clostridiales_Lachnospiraceae_Enterocloster_97                                        |
| OTU_2242   | 7.57E-01 | 7.08E-01 | 4.31E-03 | 1.10 | 3.23 | Gibbsiella_dentisursi_90              | Bacteria_Proteobacteria_Gammaproteobacteria_Enterobacterales_Enterobacteriaceae_Pseudescerichia_95                   |
| OTU_7207   | 8.85E-01 | 6.04E-01 | 1.20E-01 | 3.18 | 1.78 | Enterocloster_aldenensis_96           | Bacteria_Firmicutes_Clostridia_Clostridiales_Lachnospiraceae_Coprococcus_11                                          |
| OTU_853    | 7.07E-01 | 6.06E-01 | 1.89E-01 | 3.62 | 0.53 | Streptococcus_salivarius_97           | Bacteria_Firmicutes_Bacilli_Lactobacillales_Streptococcaceae_97_Streptococcus_96                                     |
| OTU_17734  | 7.62E-01 | 9.42E-01 | 8.52E-04 | 0.81 | 3.15 | Veillonella_dispar_96                 | Bacteria_Firmicutes_99_Negativicutes_95_Veillonellales_92_Veillonellaceae_92_Veillonella_92                          |
| OTU_19764  | 9.71E-01 | 8.94E-01 | 3.96E-02 | 2.08 | 3.23 | Bacteroides_thetaiotaomicron_98       | Bacteria_Bacteroidetes_Bacteroidia_Bacteroidales_Bacteroidaceae_Bacteroides_100                                      |
| OTU_231    | 7.46E-01 | NA       | 1.24E-01 | 1.28 | 0.00 | Bacteroides_thetaiotaomicron_97       | Bacteria_Bacteroidetes_Bacteroidia_Bacteroidales_Bacteroidaceae_Bacteroides_100                                      |
| OTU_1380   | 7.12E-01 | 9.89E-01 | 1.64E-02 | 3.07 | 0.16 | Clostridium_symbiosum_98              | Bacteria_Firmicutes_Clostridia_99_Clostridiales_99_Lachnospiraceae_99_Clostridium_XIVa_32                            |
| OTU_1392   | 8.85E-01 | 9.77E-01 | 5.63E-01 | 0.93 | 0.56 | Megasphaera_elsdenii_98               | Bacteria_Firmicutes_Negativicutes_Veillonellales_Veillonellaceae_Megasphaera_100                                     |
| OTU_242    | 9.38E-01 | 9.94E-01 | 6.49E-02 | 6.32 | 0.14 | Lactobacillus_intestinalis_100        | Bacteria_Firmicutes_Bacilli_Lactobacillales_Lactobacillaceae_Lactobacillus_100                                       |
| OTU_324    | 1.00E+00 | 8.89E-01 | 5.17E-01 | 0.22 | 0.36 | Phocaeicola_vulgatus_93               | Bacteria_Bacteroidetes_Bacteroidia_Bacteroidales_Bacteroidaceae_Phocaeicola_84                                       |
| OTU_373    | 7.07E-01 | 9.00E-01 | 3.21E-02 | 0.87 | 0.24 | Bifidobacterium_longum_92             | Bacteria_Actinobacteria_Actinobacteria_99_Bifidobacteriales_99_Bifidobacteriaceae_99_Pseudoscardovia_44              |
| OTU_8917   | 8.06E-01 | 6.05E-01 | 3.03E-03 | 1.13 | 2.89 | Enterococcus_faecalis_94              | Bacteria_Firmicutes_Bacilli_Lactobacillales_94_Carnobacteriaceae_47_Isobaculum_35                                    |
| OTU_1957   | 8.91E-01 | 9.75E-01 | 1.46E-02 | 0.88 | 3.35 | Pseudescerichia_vulneris_91           | Bacteria_Proteobacteria_67_Gammaproteobacteria_67_Enterobacterales_67_Enterobacteriaceae_67_Pseudescerichia_66       |
| OTU_639    | 8.29E-01 | 6.04E-01 | 8.55E-01 | 0.45 | 0.39 | Haemophilus_parainfluenzae_98         | Bacteria_Proteobacteria_98_Gammaproteobacteria_98_Pasteurellales_98_Pasteurellaceae_98_Conservatibacter_62           |
| OTU_8557   | 9.65E-01 | 8.36E-01 | 5.24E-01 | 2.05 | 2.41 | Bacteroides_uniformis_95              | Bacteria_Bacteroidetes_Bacteroidia_Bacteroidales_Bacteroidaceae_Bacteroides_98                                       |
| OTU_3109   | 7.07E-01 | 5.62E-01 | 2.53E-01 | 1.96 | 2.83 | Erysipelatoclostridium_amosum_95      | Bacteria_Firmicutes_Erysipelotrichia_84_Erysipelotrichales_84_Erysipelatoclostridiaceae_82_Erysipelatoclostridium_82 |
| OTU_34827  | 7.11E-01 | 9.41E-01 | 1.33E-02 | 2.45 | 0.28 | Bifidobacterium_stercoris_98          | Bacteria_Actinobacteria_Actinobacteria_Bifidobacteriales_Bifidobacteriaceae_Bifidobacterium_95                       |
| OTU_3868   | 8.82E-01 | 9.45E-01 | 6.48E-01 | 2.06 | 1.77 | Coprococcus_comes_95                  | Bacteria_Firmicutes_Clostridia_Clostridiales_Lachnospiraceae_Coprococcus_39                                          |
| OTU_169    | 9.69E-01 | NA       | 2.06E-01 | 2.36 | 0.00 | Butyrivibrio_crossotus_97             | Bacteria_Firmicutes_Clostridia_Clostridiales_Lachnospiraceae_Clostridium_XIVa_49                                     |
| OTU_478    | 7.11E-01 | 6.14E-01 | 1.85E-01 | 3.56 | 0.90 | Kineothrix_alysoides_97               | Bacteria_Firmicutes_Clostridia_Clostridiales_Lachnospiraceae_Kineothrix_78                                           |
| OTU_697    | 7.07E-01 | 6.46E-01 | 3.18E-02 | 2.22 | 0.11 | Fusobacterium_perfoetens_91           | Bacteria_Fusobacteria_Fusobacteriia_Fusobacteriales_Fusobacteriaceae_92_Cetobacterium_55                             |
| OTU_1098   | 8.61E-01 | 6.04E-01 | 4.12E-02 | 3.80 | 0.45 | Intestinimonas_butyrificiproducens_97 | Bacteria_Firmicutes_Clostridia_Clostridiales_Ruminococcaceae_Intestinimonas_61                                       |
| OTU_1871   | 9.61E-01 | 6.05E-01 | 4.79E-03 | 3.56 | 1.06 | Clostridium_gasigenes_89              | Bacteria_Bacteroidetes_59_Bacteroidia_59_Bacteroidales_59_Bacteroidaceae_57_Mediterranea_37                          |
| OTU_3281   | 9.39E-01 | 9.57E-01 | 7.91E-02 | 1.20 | 2.03 | Enterocloster_clostridioformis_96     | Bacteria_Firmicutes_Clostridia_Clostridiales_Lachnospiraceae_Enterocloster_97                                        |
| OTU_399    | 9.75E-01 | 6.05E-01 | 2.96E-02 | 4.39 | 0.32 | Acetivibrio_alkalicellulosi_92        | Bacteria_Firmicutes_98_Clostridia_98_Clostridiales_98_Ruminococcaceae_85_Colidextribacter_42                         |
| OTU_1889   | 8.61E-01 | 8.83E-01 | 5.25E-03 | 3.25 | 0.66 | Clostridium_symbiosum_90              | Bacteria_Firmicutes_Clostridia_Clostridiales_Lachnospiraceae_Clostridium_XIVa_60                                     |
| OTU_27573  | 7.07E-01 | 7.02E-01 | 1.04E-04 | 3.43 | 0.70 | Bacteroides_xylanisolvens_98          | Bacteria_Bacteroidetes_76_Bacteroidia_76_Bacteroidales_76_Bacteroidaceae_76_Bacteroides_63                           |
| OTU_605    | 8.05E-01 | 9.69E-01 | 2.59E-01 | 0.02 | 1.76 | Sphingobium_phenoxybenzoativorans_99  | Bacteria_Proteobacteria_Alphaproteobacteria_Sphingomonadales_Sphingomonadaceae_Sphingobium_93                        |
| OTU_7287   | 9.84E-01 | 8.83E-01 | 3.47E-03 | 1.09 | 3.07 | Enterocloster_citroniae_100           | Bacteria_Firmicutes_93_Clostridia_93_Clostridiales_93_Lachnospiraceae_93_Enterocloster_58                            |
| OTU_809    | 7.07E-01 | 6.04E-01 | 2.93E-01 | 1.71 | 3.21 | Dialister_propionificaciens_91        | Bacteria_Firmicutes_Negativicutes_87_Veillonellales_87_Veillonellaceae_87_Dialister_84                               |
| OTU_1418   | 7.07E-01 | 8.28E-01 | 1.45E-02 | 2.17 | 0.49 | Bifidobacterium_stercoris_97          | Bacteria_Actinobacteria_Actinobacteria_Bifidobacteriales_Bifidobacteriaceae_Bifidobacterium_87                       |
| OTU_14648  | 9.38E-01 | 9.18E-01 | 1.01E-02 | 2.26 | 0.23 | Bacteroides_uniformis_94              | Bacteria_Bacteroidetes_Bacteroidia_Bacteroidales_Bacteroidaceae_Phocaeicola_77                                       |
| OTU_3622   | 8.60E-01 | 9.94E-01 | 2.43E-02 | 1.76 | 2.58 | Pseudescerichia_vulneris_93           | Bacteria_Proteobacteria_99_Gammaproteobacteria_99_Enterobacterales_99_Enterobacteriaceae_98_Pseudescerichia_75       |
| OTU_486    | 9.38E-01 | 9.60E-01 | 7.63E-01 | 1.23 | 1.01 | Pseudescerichia_vulneris_99           | Bacteria_Proteobacteria_90_Gammaproteobacteria_90_Enterobacterales_90_Enterobacteriaceae_90_Pseudescerichia_81       |
| OTU_2114   | 7.82E-01 | 8.68E-01 | 5.50E-02 | 1.62 | 2.54 | Bacteroides_faecis_91                 | Bacteria_Bacteroidetes_88_Bacteroidia_87_Bacteroidales_87_Bacteroidaceae_82_Bacteroides_47                           |
| OTU_27058  | 8.25E-01 | 6.72E-01 | 5.83E-02 | 1.39 | 2.56 | Pseudescerichia_vulneris_97           | Bacteria_Proteobacteria_Gammaproteobacteria_Enterobacterales_Enterobacteriaceae_Escherichia/Shigella_91              |
| OTU_10263  | 7.07E-01 | 9.90E-01 | 1.67E-01 | 1.78 | 0.82 | Collinsella_aerofaciens_96            | Bacteria_Actinobacteria_Coribacteriia_Coribacteriales_Coribacteriaceae_Collinsella_99                                |
| OTU_1201   | 7.57E-01 | 7.42E-01 | 3.60E-01 | 2.88 | 2.08 | Faecalicatena_erotica_97              | Bacteria_Firmicutes_Clostridia_Clostridiales_Lachnospiraceae_Clostridium_XIVa_52                                     |
| OTU_30118  | 7.07E-01 | 8.85E-01 | 2.03E-02 | 1.00 | 3.90 | Bacteroides_thetaiotaomicron_97       | Bacteria_Bacteroidetes_Bacteroidia_Bacteroidales_Bacteroidaceae_Bacteroides_100                                      |
| OTU_3473   | 7.07E-01 | 6.04E-01 | 8.10E-03 | 3.16 | 0.66 | Bifidobacterium_stercoris_96          | Bacteria_Actinobacteria_89_Actinobacteria_89_Bifidobacteriales_89_Bifidobacteriaceae_89_Pseudoscardovia_40           |
| OTU_912    | 9.52E-01 | 6.63E-01 | 6.29E-03 | 4.19 | 0.42 | Clostridium_tarantellae_90            | Bacteria_Firmicutes_92_Clostridia_92_Clostridiales_92_Clostridiaceae_1_91_Sarcina_51                                 |
| OTU_105653 | 7.07E-01 | 9.17E-01 | 2.72E-01 | 1.32 | 0.14 | Veillonella_rogosae_98                | Bacteria_Firmicutes_Negativicutes_Veillonellales_Veillonellaceae_Veillonella_100                                     |

|           |          |          |          |      |      |                                     |                                                                                                                      |
|-----------|----------|----------|----------|------|------|-------------------------------------|----------------------------------------------------------------------------------------------------------------------|
| OTU_1480  | 8.54E-01 | 9.12E-01 | 9.17E-01 | 1.61 | 1.56 | Phocaea_massiliensis_92             | Bacteria_Firmicutes_Clostridia_Clostridiales_Ruminococcaceae_Clostridium IV_56                                       |
| OTU_1629  | 7.91E-01 | 6.04E-01 | 1.35E-02 | 2.03 | 0.68 | Phocaeicola_vulgatus_94             | Bacteria_Bacteroidetes_Bacteroidia_Bacteroidales_Bacteroidaceae_Phocaeicola_99                                       |
| OTU_2015  | 8.06E-01 | 6.04E-01 | 4.46E-03 | 3.08 | 0.94 | Bacteroides_uniformis_99            | Bacteria_Bacteroidetes_80_Bacteroidia_80_Bacteroidales_80_Bacteroidaceae_77_Mediterranea_62                          |
| OTU_3234  | 7.07E-01 | 8.36E-01 | 9.87E-03 | 4.23 | 0.35 | Bacteroides_stercoris_97            | Bacteria_Bacteroidetes_Bacteroidia_Bacteroidales_Bacteroidaceae_Bacteroides_100                                      |
| OTU_421   | 9.92E-01 | 6.14E-01 | 8.37E-02 | 2.67 | 0.61 | Oscillibacter_valericigenes_95      | Bacteria_Firmicutes_Clostridia_Clostridiales_Ruminococcaceae_Oscillibacter_53                                        |
| OTU_4929  | 9.10E-01 | 9.13E-01 | 8.92E-01 | 2.23 | 2.32 | Enterocloster_clostridioformis_96   | Bacteria_Firmicutes_Clostridia_Clostridiales_Lachnospiraceae_Clostridium XIVa_89                                     |
| OTU_51071 | 8.25E-01 | 8.83E-01 | 1.92E-01 | 1.47 | 0.63 | Parabacteroides_distasonis_97       | Bacteria_Bacteroidetes_Bacteroidia_Bacteroidales_Porphyromonadaceae_Parabacteroides_100                              |
| OTU_7222  | 9.96E-01 | 6.10E-01 | 5.43E-02 | 2.48 | 1.60 | Enterocloster_aldenensis_97         | Bacteria_Firmicutes_Clostridia_Clostridiales_Lachnospiraceae_Clostridium XIVa_44                                     |
| OTU_84567 | 7.07E-01 | 7.07E-01 | 7.46E-02 | 4.66 | 0.34 | Bacteroides_stercoris_96            | Bacteria_Bacteroidetes_Bacteroidia_Bacteroidales_Bacteroidaceae_Bacteroides_100                                      |
| OTU_1915  | 7.59E-01 | 7.11E-01 | 2.34E-02 | 0.66 | 2.87 | Enterocloster_citroniae_100         | Bacteria_Firmicutes_94_Clostridia_94_Clostridiales_94_Lachnospiraceae_94_Enterocloster_56                            |
| OTU_2955  | 7.57E-01 | 7.40E-01 | 1.95E-05 | 3.68 | 0.83 | Parabacteroides_distasonis_96       | Bacteria_Bacteroidetes_Bacteroidia_Bacteroidales_Porphyromonadaceae_81_Parabacteroides_81                            |
| OTU_440   | 9.35E-01 | 8.65E-01 | 3.64E-01 | 0.17 | 0.32 | Haemophilus_parainfluenzae_99       | Bacteria_Proteobacteria_Gammaproteobacteria_Pasteurellales_Pasteurellaceae_Conservatibacter_87                       |
| OTU_58010 | 8.06E-01 | 9.97E-01 | 4.37E-03 | 0.26 | 4.02 | Bacteroides_kribbi_97               | Bacteria_Bacteroidetes_Bacteroidia_Bacteroidales_Bacteroidaceae_Bacteroides_100                                      |
| OTU_1139  | 7.59E-01 | 7.83E-01 | 7.83E-03 | 1.91 | 0.75 | Faecalibacterium_prausnitzii_99     | Bacteria_Firmicutes_Clostridia_Clostridiales_Ruminococcaceae_Faecalibacterium_100                                    |
| OTU_268   | 7.07E-01 | 9.13E-01 | 3.52E-01 | 0.90 | 3.90 | Granulicatella_adiacens_100         | Bacteria_Firmicutes_Bacilli_Lactobacillales_Carnobacteriaceae_99_Granulicatella_98                                   |
| OTU_3491  | 7.07E-01 | 7.31E-01 | 2.20E-02 | 2.83 | 0.86 | Pseudescherichia_vulneris_89        | Bacteria_Proteobacteria_Gammaproteobacteria_Enterobacterales_Enterobacteriaceae_Pseudescherichia_84                  |
| OTU_4145  | 9.46E-01 | 6.96E-01 | 5.52E-02 | 2.44 | 1.41 | Pseudescherichia_vulneris_88        | Bacteria_Proteobacteria_89_Gammaproteobacteria_89_Enterobacterales_89_Enterobacteriaceae_88_Pseudescherichia_85      |
| OTU_524   | 8.97E-01 | 6.04E-01 | 2.04E-02 | 3.40 | 0.48 | Flintibacter_butyriscus_94          | Bacteria_Firmicutes_Clostridia_Clostridiales_Ruminococcaceae_Colidextribacter_56                                     |
| OTU_9973  | 8.58E-01 | 9.69E-01 | 7.48E-01 | 1.98 | 1.78 | Rheinheimera_baltica_86             | Bacteria_Proteobacteria_93_Gammaproteobacteria_93_Enterobacterales_93_Enterobacteriaceae_92_Pseudescherichia_91      |
| OTU_1413  | 9.92E-01 | 7.40E-01 | 3.76E-02 | 0.69 | 2.59 | Enterocloster_citroniae_94          | Bacteria_Firmicutes_Clostridia_Clostridiales_Lachnospiraceae_Enterocloster_88                                        |
| OTU_37426 | 7.07E-01 | 8.50E-01 | 2.91E-01 | 2.19 | 1.29 | Pseudescherichia_vulneris_96        | Bacteria_Proteobacteria_Gammaproteobacteria_Enterobacterales_Enterobacteriaceae_Escherichia/Shigella_59              |
| OTU_454   | 9.67E-01 | 6.04E-01 | 3.63E-01 | 0.62 | 3.64 | Bacteroides_fragilis_87             | Bacteria_Fusobacteria_87_Fusobacteriia_87_Fusobacteriales_87_Fusobacteriaceae_85_Cetobacterium_61                    |
| OTU_472   | 7.07E-01 | 6.14E-01 | 2.54E-01 | 1.20 | 0.37 | Bifidobacterium_stercoris_92        | Bacteria_Actinobacteria_98_Actinobacteria_98_Bifidobacteriales_98_Bifidobacteriaceae_98_Pseudoscardovia_48           |
| OTU_54955 | 9.94E-01 | 8.57E-01 | 9.42E-02 | 1.01 | 2.60 | Lachnodostridium_pacaense_97        | Bacteria_Firmicutes_Clostridia_Clostridiales_Lachnospiraceae_Enterocloster_80                                        |
| OTU_1032  | 7.07E-01 | 8.14E-01 | 9.22E-02 | 1.12 | 0.34 | Phocaeicola_vulgatus_98             | Bacteria_Bacteroidetes_Bacteroidia_Bacteroidales_Bacteroidaceae_Phocaeicola_98                                       |
| OTU_1208  | 8.83E-01 | 6.66E-01 | 4.01E-01 | 0.13 | 0.26 | Collinsella_aerofaciens_99          | Bacteria_Actinobacteria_97_Coriobacteriia_97_Coriobacteriales_97_Coriobacteriaceae_97_Collinsella_96                 |
| OTU_62482 | 8.97E-01 | 9.46E-01 | 8.10E-03 | 1.03 | 2.31 | Shigella_dysenteriae_95             | Bacteria_Proteobacteria_Gammaproteobacteria_Enterobacterales_Enterobacteriaceae_Pseudescherichia_81                  |
| OTU_7032  | 7.57E-01 | 6.39E-01 | 8.76E-03 | 1.38 | 0.57 | Blautia_luti_98                     | Bacteria_Firmicutes_Clostridia_Clostridiales_Lachnospiraceae_Blautia_96                                              |
| OTU_7315  | 7.07E-01 | 6.04E-01 | 3.60E-01 | 1.57 | 2.19 | Eubacterium_limosum_95              | Bacteria_Firmicutes_Clostridia_Clostridiales_Eubacteriaceae_94_Eubacterium_60                                        |
| OTU_8050  | 9.50E-01 | 7.34E-01 | 4.67E-02 | 1.62 | 3.07 | Bacteroides_xylanisolvens_97        | Bacteria_Bacteroidetes_Bacteroidia_Bacteroidales_Bacteroidaceae_Bacteroides_100                                      |
| OTU_80939 | 9.38E-01 | 6.04E-01 | 1.50E-02 | 3.36 | 0.74 | Bacteroides_xylanisolvens_98        | Bacteria_Bacteroidetes_Bacteroidia_Bacteroidales_Bacteroidaceae_Bacteroides_100                                      |
| OTU_83802 | 7.07E-01 | 8.28E-01 | 2.52E-01 | 2.83 | 0.39 | Bacteroides_uniformis_94            | Bacteria_Bacteroidetes_Bacteroidia_Bacteroidales_Bacteroidaceae_Phocaeicola_67                                       |
| OTU_1532  | 9.87E-01 | 6.04E-01 | 1.41E-01 | 1.04 | 2.68 | Pseudescherichia_vulneris_91        | Bacteria_Proteobacteria_99_Gammaproteobacteria_99_Enterobacterales_99_Enterobacteriaceae_99_Pseudescherichia_70      |
| OTU_1914  | 9.37E-01 | 9.17E-01 | 1.20E-03 | 2.54 | 0.88 | Bacteroides_uniformis_96            | Bacteria_Bacteroidetes_Bacteroidia_Bacteroidales_Bacteroidaceae_Bacteroides_100                                      |
| OTU_282   | 9.31E-01 | 6.04E-01 | 4.86E-01 | 2.76 | 1.19 | Anaeroplasma_abactoclasticum_91     | Bacteria_Tenericutes_99_Mollicutes_99_Anaeroplasmatales_99_Anaeroplasmataceae_99_Anaeroplasma_99                     |
| OTU_3129  | 7.07E-01 | 9.90E-01 | 2.94E-02 | 2.93 | 0.29 | Erysipelatoclostridium_amosum_89    | Bacteria_Firmicutes_Erysipelotrichia_98_Erysipelotrichales_98_Erysipelatoclostridiaceae_98_Erysipelatoclostridium_98 |
| OTU_637   | 8.42E-01 | 5.32E-01 | 4.32E-01 | 3.30 | 1.05 | Bacteroides_stercoris_97            | Bacteria_Bacteroidetes_Bacteroidia_Bacteroidales_Bacteroidaceae_Bacteroides_78                                       |
| OTU_7692  | 7.07E-01 | 9.85E-01 | 1.51E-04 | 3.68 | 0.80 | Roseburia_inulinivorans_94          | Bacteria_Firmicutes_Clostridia_Clostridiales_Lachnospiraceae_87_Roseburia_28                                         |
| OTU_9545  | 8.85E-01 | 4.60E-01 | 1.04E-01 | 2.35 | 1.62 | Pseudescherichia_vulneris_100       | Bacteria_Proteobacteria_Gammaproteobacteria_Enterobacterales_Enterobacteriaceae_99_Escherichia/Shigella_63           |
| OTU_96721 | 8.06E-01 | 9.89E-01 | 2.64E-01 | 0.98 | 1.69 | Enterocloster_citroniae_97          | Bacteria_Firmicutes_Clostridia_Clostridiales_Lachnospiraceae_Enterocloster_96                                        |
| OTU_1292  | 8.06E-01 | 6.04E-01 | 2.04E-02 | 3.03 | 0.39 | Lactobacillus_johnsonii_89          | Bacteria_Proteobacteria_95_Gammaproteobacteria_95_Enterobacterales_95_Enterobacteriaceae_95_Pseudescherichia_93      |
| OTU_13064 | 7.73E-01 | 6.04E-01 | 6.14E-03 | 3.96 | 0.40 | Bacteroides_stercoris_96            | Bacteria_Bacteroidetes_Bacteroidia_Bacteroidales_Bacteroidaceae_Bacteroides_83                                       |
| OTU_28622 | 9.23E-01 | 6.04E-01 | 1.77E-02 | 2.54 | 1.18 | Enterocloster_clostridioformis_96   | Bacteria_Firmicutes_Clostridia_Clostridiales_Lachnospiraceae_Enterocloster_80                                        |
| OTU_2819  | 7.07E-01 | 7.07E-01 | 8.33E-01 | 2.39 | 2.18 | Clostridium_scindens_97             | Bacteria_Firmicutes_Clostridia_Clostridiales_Lachnospiraceae_Clostridium XIVa_90                                     |
| OTU_446   | 7.07E-01 | 6.16E-01 | 7.60E-01 | 2.43 | 1.69 | Lacrimispora_saccharolytica_95      | Bacteria_Firmicutes_Clostridia_Clostridiales_Lachnospiraceae_Hungatella_24                                           |
| OTU_6316  | 7.91E-01 | 7.97E-01 | 2.05E-01 | 2.78 | 1.70 | Clostridium_symbiosum_95            | Bacteria_Firmicutes_Clostridia_Clostridiales_Lachnospiraceae_Clostridium XIVa_70                                     |
| OTU_12648 | 7.07E-01 | 9.94E-01 | 4.42E-03 | 3.91 | 0.25 | Bacteroides_stercoris_95            | Bacteria_Bacteroidetes_Bacteroidia_Bacteroidales_Bacteroidaceae_97_Bacteroides_90                                    |
| OTU_1789  | 8.16E-01 | 7.07E-01 | 9.06E-01 | 1.83 | 1.76 | Kineothrix_allysoides_98            | Bacteria_Firmicutes_Clostridia_Clostridiales_Lachnospiraceae_Clostridium XIVa_63                                     |
| OTU_376   | 7.07E-01 | 8.00E-01 | 1.68E-02 | 4.12 | 0.33 | Bacteroides_stercoris_94            | Bacteria_Bacteroidetes_Bacteroidia_99_Bacteroidales_99_Bacteroidaceae_99_Bacteroides_78                              |
| OTU_753   | 7.10E-01 | 6.04E-01 | 9.49E-01 | 0.56 | 0.58 | Kineothrix_allysoides_97            | Bacteria_Firmicutes_Clostridia_Clostridiales_Lachnospiraceae_Kineothrix_30                                           |
| OTU_1444  | 9.38E-01 | 6.04E-01 | 1.44E-01 | 2.11 | 1.23 | Pseudescherichia_vulneris_97        | Bacteria_Proteobacteria_Gammaproteobacteria_Enterobacterales_Enterobacteriaceae_Escherichia/Shigella_82              |
| OTU_4296  | 7.07E-01 | 4.60E-01 | 2.49E-03 | 3.29 | 1.16 | Roseburia_inulinivorans_95          | Bacteria_Firmicutes_Clostridia_Clostridiales_Lachnospiraceae_99_Roseburia_91                                         |
| OTU_920   | 9.43E-01 | 6.42E-01 | 1.64E-01 | 0.65 | 3.40 | Coproccoccus_comes_97               | Bacteria_Firmicutes_95_Clostridia_95_Clostridiales_95_Lachnospiraceae_95_Bariatricus_70                              |
| OTU_17942 | 9.38E-01 | 6.72E-01 | 1.70E-01 | 2.53 | 1.67 | Enterodostera_clostridioformis_96   | Bacteria_Firmicutes_Clostridia_Clostridiales_Lachnospiraceae_Ruminococcus2_40                                        |
| OTU_4433  | 9.65E-01 | 7.22E-01 | 5.75E-01 | 0.56 | 0.74 | Enterocloster_clostridioformis_96   | Bacteria_Firmicutes_Clostridia_Clostridiales_Lachnospiraceae_Lachnospiraceae_incertae_sedis_43                       |
| OTU_661   | 7.46E-01 | 9.62E-01 | 1.40E-02 | 0.72 | 0.10 | Faecalibacterium_prausnitzii_92     | Bacteria_Firmicutes_Clostridia_Clostridiales_Ruminococcaceae_Faecalibacterium_90                                     |
| OTU_9262  | 8.94E-01 | 6.26E-01 | 1.30E-02 | 2.38 | 0.64 | Bifidobacterium_callitrichidarum_92 | Bacteria_Actinobacteria_92_Actinobacteria_92_Bifidobacteriales_91_Bifidobacteriaceae_91_Pseudoscardovia_67           |
| OTU_1369  | 8.59E-01 | 8.36E-01 | 2.01E-03 | 3.45 | 0.43 | Anaerotignum_faecicola_94           | Bacteria_Firmicutes_Clostridia_Clostridiales_Lachnospiraceae_98_Anaerotignum_98                                      |
| OTU_1724  | 9.65E-01 | 9.18E-01 | 2.34E-01 | 0.93 | 1.55 | Clostridium_methylpentosum_89       | Bacteria_Firmicutes_96_Clostridia_96_Clostridiales_96_Ruminococcaceae_84_Clostridium IV_61                           |
| OTU_1783  | 7.07E-01 | 6.04E-01 | 6.99E-02 | 1.97 | 1.17 | Enterococcus_hirae_93               | Bacteria_Firmicutes_Bacilli_Lactobacillales_99_Enterococcaceae_94_Enterococcus_52                                    |
| OTU_202   | 9.46E-01 | 7.11E-01 | 9.96E-02 | 0.94 | 0.42 | Flintibacter_butyriscus_94          | Bacteria_Firmicutes_Clostridia_Clostridiales_Ruminococcaceae_97_Intestinimonas_59                                    |
| OTU_2106  | 1.00E+00 | 7.25E-01 | 8.90E-03 | 0.71 | 2.35 | Bacteroides_thetaiotaomicron_95     | Bacteria_Bacteroidetes_75_Bacteroidia_75_Bacteroidales_75_Bacteroidaceae_75_Mediterranea_51                          |
| OTU_253   | 7.57E-01 | NA       | 1.22E-01 | 4.92 | 0.00 | Falcatimonas_natans_96              | Bacteria_Firmicutes_Clostridia_Clostridiales_Lachnospiraceae_Mediterraneibacter_44                                   |
| OTU_1599  | 9.73E-01 | 6.04E-01 | 1.75E-02 | 2.94 | 0.78 | Limosilactobacillus_reuteri_95      | Bacteria_Firmicutes_Bacilli_Lactobacillales_99_Lactobacillaceae_76_Limosilactobacillus_73                            |
| OTU_17270 | 7.07E-01 | 8.63E-01 | 4.15E-04 | 0.84 | 3.16 | Mobilitalea_sibirica_89             | Bacteria_Bacteroidetes_60_Bacteroidia_60_Bacteroidales_60_Bacteroidaceae_60_Mediterranea_28                          |
| OTU_1828  | 7.07E-01 | 8.68E-01 | 7.63E-03 | 0.83 | 3.28 | Faecalibacterium_prausnitzii_94     | Bacteria_Firmicutes_Clostridia_Clostridiales_Ruminococcaceae_Faecalibacterium_54                                     |
| OTU_226   | 9.14E-01 | 7.02E-01 | 6.15E-01 | 0.83 | 0.61 | Succinivibrio_dextrinosolvens_93    | Bacteria_Proteobacteria_Gammaproteobacteria_Aeromonadales_Succinivibrionaceae_Succinivibrio_100                      |



|            |          |          |          |      |      |                                    |                                                                                                                 |
|------------|----------|----------|----------|------|------|------------------------------------|-----------------------------------------------------------------------------------------------------------------|
| OTU_24279  | 9.43E-01 | 8.42E-01 | 4.44E-03 | 3.64 | 0.95 | Bacteroides_xylanisolvens_98       | Bacteria_Bacteroidetes_Bacteroidia_Bacteroidales_Bacteroidaceae_Bacteroides_100                                 |
| OTU_4156   | 7.12E-01 | 7.25E-01 | 1.35E-02 | 3.33 | 0.93 | Roseburia_inulinivorans_92         | Bacteria_Firmicutes_Clostridia_Clostridiales_Lachnospiraceae_82_Ruminococcus2_21                                |
| OTU_66368  | 7.53E-01 | 6.63E-01 | 7.81E-01 | 1.59 | 1.89 | Romboutsia_sedimentorum_89         | Bacteria_Proteobacteria_74_Gammaproteobacteria_74_Enterobacterales_74_Enterobacteriaceae_74_Pseudescherichia_66 |
| OTU_765    | 9.08E-01 | 7.16E-01 | 1.36E-01 | 0.79 | 2.31 | Eubacterium_callanderi_91          | Bacteria_Firmicutes_Bacilli_82_Lactobacillales_82_Carnobacteriaceae_44_Isobaculum_33                            |
| OTU_8504   | 7.23E-01 | 7.16E-01 | 5.05E-02 | 3.43 | 1.12 | Bacteroides_timonensis_97          | Bacteria_Bacteroidetes_Bacteroidia_Bacteroidales_Bacteroidaceae_Bacteroides_100                                 |
| OTU_953    | 9.07E-01 | 8.65E-01 | 3.31E-01 | 2.69 | 1.86 | Roseburia_inulinivorans_97         | Bacteria_Firmicutes_Clostridia_Clostridiales_Lachnospiraceae_Roseburia_99                                       |
| OTU_10545  | 7.57E-01 | 8.65E-01 | 7.71E-01 | 1.79 | 2.01 | Veillonella_tobetsuensis_96        | Bacteria_Firmicutes_Negativicutes_Veillonellales_Veillonellaceae_Veillonella_100                                |
| OTU_17243  | 9.64E-01 | 9.62E-01 | 1.57E-02 | 0.91 | 2.60 | Bacteroides_caccae_96              | Bacteria_Bacteroidetes_Bacteroidia_Bacteroidales_Bacteroidaceae_Bacteroides_64                                  |
| OTU_4577   | 8.73E-01 | 9.46E-01 | 2.12E-01 | 2.97 | 1.39 | Roseburia_inulinivorans_92         | Bacteria_Firmicutes_Clostridia_84_Clostridiales_84_Lachnospiraceae_84_Ruminococcus2_14                          |
| OTU_9584   | 8.44E-01 | 6.04E-01 | 3.87E-03 | 2.67 | 1.14 | Clostridium_carnis_89              | Bacteria_Proteobacteria_83_Gammaproteobacteria_83_Enterobacterales_83_Enterobacteriaceae_83_Pseudescherichia_76 |
| OTU_14810  | 9.87E-01 | 8.28E-01 | 1.49E-03 | 0.86 | 3.04 | Veillonella_tobetsuensis_89        | Bacteria_Firmicutes_Clostridia_92_Clostridiales_92_Lachnospiraceae_92_Hungatella_89                             |
| OTU_2135   | 9.84E-01 | 7.73E-01 | 6.53E-01 | 1.32 | 1.60 | Flavonifractor_plautii_93          | Bacteria_Firmicutes_Clostridia_Clostridiales_Ruminococcaceae_98_Flavonifractor_97                               |
| OTU_3949   | 8.60E-01 | 8.65E-01 | 6.08E-02 | 1.64 | 2.66 | Enterocloster_citroniae_96         | Bacteria_Firmicutes_Clostridia_Clostridiales_Lachnospiraceae_Enterocloster_64                                   |
| OTU_786    | 9.19E-01 | 8.14E-01 | 4.63E-02 | 1.12 | 2.15 | Falcatimonas_natans_89             | Bacteria_Firmicutes_99_Clostridia_76_Clostridiales_76_Lachnospiraceae_75_Falcatimonas_21                        |
| OTU_8588   | 7.70E-01 | 8.42E-01 | 1.36E-03 | 2.59 | 0.23 | Enterocloster_clostridioformis_99  | Bacteria_Firmicutes_Clostridia_98_Clostridiales_98_Lachnospiraceae_98_Enterocloster_90                          |
| OTU_1230   | 9.38E-01 | 6.99E-01 | 3.46E-02 | 0.40 | 1.22 | Enterocloster_citroniae_98         | Bacteria_Firmicutes_86_Clostridia_86_Clostridiales_86_Lachnospiraceae_86_Enterocloster_55                       |
| OTU_1383   | 9.59E-01 | 8.71E-01 | 8.41E-01 | 1.59 | 1.50 | Coproccoccus_comes_92              | Bacteria_Firmicutes_Clostridia_Clostridiales_Lachnospiraceae_77_Coproccoccus_37                                 |
| OTU_4567   | 8.31E-01 | 7.41E-01 | 3.57E-01 | 1.25 | 1.74 | Pseudescherichia_vulneris_96       | Bacteria_Proteobacteria_Gammaproteobacteria_Enterobacterales_Enterobacteriaceae_Escherichia/Shigella_75         |
| OTU_5025   | 9.63E-01 | 9.75E-01 | 2.26E-01 | 2.46 | 1.55 | Coproccoccus_comes_97              | Bacteria_Firmicutes_Clostridia_Clostridiales_Lachnospiraceae_Coproccoccus_38                                    |
| OTU_509    | 7.07E-01 | 9.85E-01 | 2.29E-01 | 0.83 | 0.07 | Bifidobacterium_stercoris_90       | Bacteria_Actinobacteria_Actinobacteria_Bifidobacteriales_Bifidobacteriaceae_Pseudoscardovia_41                  |
| OTU_60424  | 9.05E-01 | 8.78E-01 | 7.04E-02 | 1.34 | 2.09 | Pseudescherichia_vulneris_95       | Bacteria_Proteobacteria_Gammaproteobacteria_Enterobacterales_Enterobacteriaceae_Pseudescherichia_64             |
| OTU_6656   | 7.07E-01 | 6.04E-01 | 3.57E-01 | 1.60 | 2.23 | Erysipelatoclostridium_ramosum_97  | Bacteria_Firmicutes_Erysipelotrichia_Erysipelotrichiales_Erysipelatoclostridiaceae_Erysipelatoclostridium_100   |
| OTU_693    | 7.46E-01 | 6.04E-01 | 2.60E-01 | 2.49 | 0.96 | Pseudescherichia_vulneris_96       | Bacteria_Proteobacteria_Gammaproteobacteria_Enterobacterales_Enterobacteriaceae_Pseudescherichia_55             |
| OTU_8849   | 7.07E-01 | 9.72E-01 | 2.39E-03 | 2.96 | 0.65 | Shimwellia_blatiae_87              | Bacteria_Proteobacteria_Gammaproteobacteria_Enterobacterales_Enterobacteriaceae_97_Pseudescherichia_95          |
| OTU_1474   | 9.56E-01 | 9.97E-01 | 5.83E-01 | 1.19 | 1.40 | Pseudescherichia_vulneris_94       | Bacteria_Proteobacteria_Gammaproteobacteria_Enterobacterales_Enterobacteriaceae_Pseudescherichia_64             |
| OTU_2907   | 8.16E-01 | 9.70E-01 | 7.64E-02 | 1.32 | 2.50 | Enterocloster_clostridioformis_100 | Bacteria_Firmicutes_Clostridia_Clostridiales_Lachnospiraceae_Enterocloster_97                                   |
| OTU_3344   | 9.06E-01 | 6.58E-01 | 6.22E-02 | 2.55 | 1.49 | Clostridium_perfringens_98         | Bacteria_Firmicutes_71_Clostridia_71_Clostridiales_71_Clostridiaceae_1_71_Desnuesiella_31                       |
| OTU_3644   | 9.46E-01 | 6.04E-01 | 3.10E-03 | 2.97 | 0.87 | Pseudescherichia_vulneris_97       | Bacteria_Proteobacteria_Gammaproteobacteria_Enterobacterales_Enterobacteriaceae_99_Escherichia/Shigella_66      |
| OTU_398    | 7.98E-01 | 6.14E-01 | 1.65E-01 | 3.09 | 0.79 | Lacrimispora_xylanolytica_95       | Bacteria_Firmicutes_Clostridia_Clostridiales_Lachnospiraceae_Coproccoccus_16                                    |
| OTU_2230   | 9.31E-01 | 7.44E-01 | 9.21E-02 | 1.12 | 2.23 | Escherichia_coli_96                | Bacteria_Proteobacteria_Gammaproteobacteria_Enterobacterales_Enterobacteriaceae_99_Escherichia/Shigella_90      |
| OTU_1479   | 7.07E-01 | 6.68E-01 | 7.46E-02 | 0.66 | 0.13 | Bifidobacterium_catenulatum_97     | Bacteria_Actinobacteria_Actinobacteria_Bifidobacteriales_Bifidobacteriaceae_Bifidobacterium_96                  |
| OTU_16233  | 7.88E-01 | 7.17E-01 | 6.42E-01 | 1.44 | 1.62 | Enterocloster_clostridioformis_97  | Bacteria_Firmicutes_Clostridia_Clostridiales_Lachnospiraceae_Clostridium_XIVa_58                                |
| OTU_4269   | 7.59E-01 | 6.16E-01 | 3.90E-03 | 1.78 | 0.59 | Escherichia_coli_87                | Bacteria_Proteobacteria_52_Gammaproteobacteria_52_Enterobacterales_52_Enterobacteriaceae_52_Pseudescherichia_52 |
| OTU_4686   | 9.38E-01 | 8.65E-01 | 7.11E-01 | 2.21 | 1.99 | Roseburia_inulinivorans_96         | Bacteria_Firmicutes_Clostridia_Clostridiales_Lachnospiraceae_Roseburia_72                                       |
| OTU_711    | 7.14E-01 | 9.46E-01 | 1.70E-01 | 0.74 | 0.23 | Phocaeicola_vulgatus_96            | Bacteria_Bacteroidetes_Bacteroidia_Bacteroidales_Bacteroidaceae_Bacteroides_49                                  |
| OTU_100628 | 9.64E-01 | 6.04E-01 | 5.91E-02 | 2.70 | 1.02 | Clostridium_perfringens_97         | Bacteria_Firmicutes_Clostridia_Clostridiales_Clostridiaceae_1_Clostridium_sensu_stricto_92                      |
| OTU_101215 | 9.48E-01 | 9.37E-01 | 1.34E-01 | 2.67 | 1.50 | Roseburia_inulinivorans_97         | Bacteria_Firmicutes_Clostridia_Clostridiales_Lachnospiraceae_Roseburia_83                                       |
| OTU_1489   | 9.87E-01 | 9.69E-01 | 9.54E-01 | 2.08 | 2.05 | Pseudescherichia_vulneris_95       | Bacteria_Proteobacteria_Gammaproteobacteria_Enterobacterales_Enterobacteriaceae_Pseudescherichia_53             |
| OTU_2366   | 8.85E-01 | 6.04E-01 | 1.38E-01 | 2.26 | 0.72 | Lactobacillus_johnsonii_97         | Bacteria_Firmicutes_Bacilli_Lactobacillales_Lactobacillaceae_Lactobacillus_95                                   |
| OTU_4708   | 8.29E-01 | 6.08E-01 | 3.37E-01 | 0.22 | 0.40 | Phocaeicola_coprophilus_97         | Bacteria_Bacteroidetes_Bacteroidia_Bacteroidales_Bacteroidaceae_Phocaeicola_100                                 |
| OTU_47198  | 7.07E-01 | 8.23E-01 | 4.89E-02 | 2.07 | 0.28 | Veillonella_atypica_96             | Bacteria_Firmicutes_Negativicutes_Veillonellales_Veillonellaceae_Veillonella_100                                |
| OTU_49472  | 7.59E-01 | 9.57E-01 | 8.45E-02 | 1.70 | 2.56 | Escherichia_albertii_92            | Bacteria_Proteobacteria_97_Gammaproteobacteria_97_Enterobacterales_97_Enterobacteriaceae_97_Pseudescherichia_95 |
| OTU_12390  | 9.64E-01 | 8.08E-01 | 1.87E-01 | 2.21 | 1.64 | Enterocloster_citroniae_96         | Bacteria_Firmicutes_Clostridia_Clostridiales_Lachnospiraceae_Coproccoccus_31                                    |
| OTU_20380  | 7.11E-01 | 6.04E-01 | 3.08E-08 | 3.59 | 0.59 | Bacteroides_uniformis_97           | Bacteria_Bacteroidetes_Bacteroidia_Bacteroidales_Bacteroidaceae_Bacteroides_85                                  |
| OTU_2327   | 9.14E-01 | 9.90E-01 | 3.64E-01 | 1.48 | 1.94 | Pseudescherichia_vulneris_88       | Bacteria_Proteobacteria_33_Gammaproteobacteria_33_Enterobacterales_33_Enterobacteriaceae_33_Pseudescherichia_33 |
| OTU_2940   | 9.23E-01 | 7.65E-01 | 2.26E-06 | 3.54 | 0.46 | Bacteroides_uniformis_88           | Bacteria_Bacteroidetes_68_Bacteroidia_68_Bacteroidales_68_Bacteroidaceae_65_Mediterranea_45                     |
| OTU_13674  | 7.93E-01 | 8.33E-01 | 4.49E-02 | 1.58 | 2.59 | Bacteroides_thetaiotaomicron_98    | Bacteria_Bacteroidetes_Bacteroidia_Bacteroidales_Bacteroidaceae_Bacteroides_100                                 |
| OTU_1847   | 7.07E-01 | 6.04E-01 | 2.83E-02 | 1.57 | 0.49 | Collinsella_aerofaciens_97         | Bacteria_Actinobacteria_Coriobacteriia_Coriobacteriales_Coriobacteriaceae_Collinsella_98                        |
| OTU_2182   | 9.05E-01 | 6.63E-01 | 1.60E-02 | 3.26 | 0.84 | Bacteroides_caccae_96              | Bacteria_Bacteroidetes_Bacteroidia_Bacteroidales_Bacteroidaceae_Bacteroides_84                                  |
| OTU_35236  | 7.07E-01 | 6.04E-01 | 6.31E-02 | 0.96 | 1.79 | Enterococcus_faecalis_98           | Bacteria_Firmicutes_Bacilli_Lactobacillales_Enterococcaceae_98_Enterococcus_65                                  |
| OTU_353    | 7.46E-01 | 6.04E-01 | 1.14E-01 | 2.02 | 0.15 | Muribaculum_intestinale_91         | Bacteria_Bacteroidetes_Bacteroidia_Bacteroidales_Muribaculaceae_Duncaniella_79                                  |
| OTU_4789   | 8.54E-01 | 7.02E-01 | 2.07E-01 | 0.65 | 0.27 | Phocaeicola_plebeius_94            | Bacteria_Bacteroidetes_Bacteroidia_Bacteroidales_Bacteroidaceae_Phocaeicola_100                                 |
| OTU_67190  | 9.87E-01 | 8.51E-01 | 7.30E-02 | 1.06 | 1.57 | Pseudescherichia_vulneris_96       | Bacteria_Proteobacteria_Gammaproteobacteria_Enterobacterales_Enterobacteriaceae_Escherichia/Shigella_73         |
| OTU_8457   | 9.45E-01 | 6.04E-01 | 4.20E-02 | 2.09 | 0.91 | Veillonella_atypica_95             | Bacteria_Firmicutes_Negativicutes_Veillonellales_Veillonellaceae_Veillonella_100                                |
| OTU_901    | 7.57E-01 | 9.85E-01 | 4.20E-02 | 0.51 | 2.71 | Catelicoccus_marinimammalium_86    | Bacteria_Firmicutes_Clostridia_88_Clostridiales_88_Ruminococcaceae_88_Faecalibacterium_52                       |
| OTU_26319  | 7.57E-01 | 9.60E-01 | 8.70E-01 | 1.23 | 1.17 | Merdimonas_faecis_95               | Bacteria_Firmicutes_Clostridia_Clostridiales_Lachnospiraceae_Clostridium_XIVa_76                                |
| OTU_3575   | 9.87E-01 | 9.13E-01 | 1.58E-02 | 3.05 | 0.95 | Clostridium_symbiosum_95           | Bacteria_Firmicutes_Clostridia_Clostridiales_Lachnospiraceae_99_Clostridium_XIVa_55                             |
| OTU_533    | 7.12E-01 | 8.59E-01 | 3.87E-01 | 0.41 | 0.11 | Fusobacterium_mortiferum_95        | Bacteria_Fusobacteria_Fusobacteriia_Fusobacteriales_Fusobacteriaceae_95_Cetobacterium_63                        |
| OTU_63215  | 8.25E-01 | 6.11E-01 | 8.21E-01 | 1.85 | 1.99 | Enterococcus_faecalis_97           | Bacteria_Firmicutes_Bacilli_Lactobacillales_Enterococcaceae_84_Enterococcus_50                                  |
| OTU_1655   | 8.43E-01 | 6.14E-01 | 2.53E-02 | 2.55 | 0.32 | Lactobacillus_johnsonii_97         | Bacteria_Firmicutes_Bacilli_Lactobacillales_Lactobacillaceae_Lactobacillus_97                                   |
| OTU_1694   | 7.45E-01 | 6.04E-01 | 5.69E-01 | 1.25 | 1.72 | Dialister_succinatiphilus_94       | Bacteria_Firmicutes_Negativicutes_98_Veillonellales_96_Veillonellaceae_96_Dialister_96                          |
| OTU_558    | 7.07E-01 | 6.04E-01 | 8.70E-01 | 1.64 | 1.96 | Fusobacterium_perfoetens_91        | Bacteria_Fusobacteria_Fusobacteriia_Fusobacteriales_Fusobacteriaceae_89_Cetobacterium_58                        |
| OTU_722    | 7.10E-01 | 7.77E-01 | 1.33E-01 | 1.12 | 0.65 | Flintibacter_butyricus_95          | Bacteria_Firmicutes_Clostridia_Clostridiales_Ruminococcaceae_Intestinimonas_33                                  |
| OTU_1426   | 7.07E-01 | 9.35E-01 | 5.05E-02 | 1.60 | 0.22 | Hungatella_effluvii_95             | Bacteria_Firmicutes_62_Clostridia_62_Clostridiales_62_Lachnospiraceae_62_Merdimonas_33                          |
| OTU_1898   | 9.60E-01 | 9.54E-01 | 9.37E-02 | 2.15 | 1.27 | Clostridium_symbiosum_94           | Bacteria_Firmicutes_Clostridia_Clostridiales_Lachnospiraceae_Clostridium_XIVa_55                                |
| OTU_333    | 7.11E-01 | 6.04E-01 | 6.29E-01 | 1.34 | 2.03 | Pseudoflavonifractor_capillosus_97 | Bacteria_Firmicutes_Clostridia_Clostridiales_Ruminococcaceae_Pseudoflavonifractor_51                            |
| OTU_3558   | 8.31E-01 | 6.04E-01 | 9.27E-04 | 3.12 | 0.79 | Enterocloster_citroniae_100        | Bacteria_Firmicutes_78_Clostridia_78_Clostridiales_78_Lachnospiraceae_78_Enterocloster_52                       |

|            |          |          |          |      |      |                                    |                                                                                                                 |
|------------|----------|----------|----------|------|------|------------------------------------|-----------------------------------------------------------------------------------------------------------------|
| OTU_4020   | 9.42E-01 | 6.04E-01 | 6.48E-03 | 3.67 | 0.53 | Bacteroides_xylanisolvens_98       | Bacteria_Bacteroidetes_89_Bacteroidia_89_Bacteroidales_89_Bacteroidaceae_89_Bacteroides_81                      |
| OTU_4154   | 8.54E-01 | 7.36E-01 | 4.02E-02 | 2.24 | 0.73 | Clostridium_perfringens_96         | Bacteria_Firmicutes_Clostridia_Clostridiales_Clostridiaceae_1_90_Sarcina_39                                     |
| OTU_4281   | 7.11E-01 | 6.04E-01 | 8.58E-01 | 1.58 | 1.50 | Pseudescherichia_vulneris_98       | Bacteria_Proteobacteria_Gammaproteobacteria_Enterobacterales_Enterobacteriaceae_Pseudescherichia_83             |
| OTU_4488   | 7.07E-01 | 9.37E-01 | 5.02E-03 | 2.65 | 0.53 | Streptococcus_cristatus_97         | Bacteria_Firmicutes_Bacilli_Lactobacillales_Streptococcaceae_97_Streptococcus_87                                |
| OTU_481    | 9.87E-01 | 8.08E-01 | 8.70E-01 | 0.35 | 0.31 | Duncaniella_freteri_86             | Bacteria_Bacteroidetes_Bacteroidia_Bacteroidales_Muribaculaceae_71_Muribaculum_69                               |
| OTU_1013   | 7.91E-01 | 6.04E-01 | 4.31E-03 | 1.81 | 0.32 | Bacteroides_fragilis_96            | Bacteria_Bacteroidetes_Bacteroidia_Bacteroidales_Bacteroidaceae_Bacteroides_100                                 |
| OTU_209    | 7.07E-01 | 6.14E-01 | 3.12E-01 | 4.74 | 0.26 | Ruminococcus_albus_92              | Bacteria_Firmicutes_Clostridia_Clostridiales_Ruminococcaceae_Tepidibaculum_43                                   |
| OTU_2282   | 7.07E-01 | 8.36E-01 | 2.50E-02 | 1.02 | 2.51 | Falcatimonas_natans_90             | Bacteria_Firmicutes_Clostridia_63_Clostridiales_63_Lachnospiraceae_63_Falcatimonas_13                           |
| OTU_3439   | 8.60E-01 | 6.04E-01 | 3.34E-01 | 1.57 | 1.09 | Senegalimassilia_anaerobia_93      | Bacteria_Actinobacteria_Coriobacteriia_Coriobacteriales_Coriobacteriaceae_Senegalimassilia_100                  |
| OTU_701    | 7.59E-01 | 9.54E-01 | 1.84E-01 | 1.34 | 0.54 | Pseudescherichia_vulneris_91       | Bacteria_Proteobacteria_99_Gammaproteobacteria_99_Enterobacterales_99_Enterobacteriaceae_99_Pseudescherichia_95 |
| OTU_1096   | 9.31E-01 | 6.05E-01 | 1.71E-02 | 3.64 | 0.35 | Enterococcus_dispar_100            | Bacteria_Firmicutes_Bacilli_98_Lactobacillales_98_Carnobacteriaceae_45_Isobaculum_44                            |
| OTU_1278   | 8.08E-01 | 6.04E-01 | 1.44E-02 | 4.02 | 0.24 | Clostridium_cadaveris_97           | Bacteria_Proteobacteria_55_Gammaproteobacteria_55_Enterobacterales_55_Enterobacteriaceae_54_Pseudescherichia_54 |
| OTU_1805   | 9.08E-01 | 6.76E-01 | 6.06E-01 | 1.53 | 1.82 | Clostridium_scindens_96            | Bacteria_Firmicutes_Clostridia_Clostridiales_Lachnospiraceae_Clostridium_XIVa_96                                |
| OTU_21418  | 7.07E-01 | 9.43E-01 | 1.55E-02 | 2.20 | 1.14 | Merdimonas_facies_96               | Bacteria_Firmicutes_Clostridia_Clostridiales_Lachnospiraceae_Clostridium_XIVa_83                                |
| OTU_381    | 9.99E-01 | 6.50E-01 | 3.53E-01 | 0.77 | 0.49 | Flintibacter_butyricus_93          | Bacteria_Firmicutes_Clostridia_Clostridiales_Ruminococcaceae_99_Sporobacter_40                                  |
| OTU_914    | 7.57E-01 | 6.04E-01 | 1.05E-01 | 2.78 | 1.03 | Clostridium_symbiosum_94           | Bacteria_Firmicutes_70_Clostridia_70_Clostridiales_70_Lachnospiraceae_70_Coproccoccus_21                        |
| OTU_10024  | 9.73E-01 | 6.04E-01 | 1.34E-03 | 2.73 | 0.39 | Streptococcus_gordonii_98          | Bacteria_Firmicutes_Bacilli_Lactobacillales_Streptococcaceae_Streptococcus_100                                  |
| OTU_10712  | 9.08E-01 | 9.15E-01 | 2.99E-02 | 3.10 | 0.37 | Veillonella_atypica_97             | Bacteria_Firmicutes_Negativicutes_Veillonellales_Veillonellaceae_Veillonella_100                                |
| OTU_1177   | 7.07E-01 | 8.83E-01 | 3.76E-02 | 1.14 | 0.37 | Phocaeicola_vulgatus_99            | Bacteria_Bacteroidetes_93_Bacteroidia_93_Bacteroidales_93_Bacteroidaceae_93_Phocaeicola_93                      |
| OTU_13335  | 1.00E+00 | 7.29E-01 | 1.74E-01 | 2.07 | 1.39 | Ruminococcus_torques_97            | Bacteria_Firmicutes_Clostridia_Clostridiales_Lachnospiraceae_Ruminococcus2_70                                   |
| OTU_2451   | 9.92E-01 | 6.29E-01 | 6.47E-01 | 1.80 | 2.06 | Paraclostridium_benzoelyticum_100  | Bacteria_Firmicutes_Clostridia_Clostridiales_Peptostreptococcaceae_Paraclostridium_100                          |
| OTU_2899   | 8.25E-01 | 8.50E-01 | 5.59E-01 | 1.85 | 1.55 | Enterocloster_aldenensis_93        | Bacteria_Firmicutes_Clostridia_Clostridiales_Lachnospiraceae_85_Enterocloster_22                                |
| OTU_5105   | 9.78E-01 | 9.32E-01 | 2.31E-01 | 1.66 | 1.19 | Lachnoclostridium_pacaense_96      | Bacteria_Firmicutes_Clostridia_Clostridiales_Lachnospiraceae_Clostridium_XIVa_32                                |
| OTU_69974  | 7.07E-01 | 6.04E-01 | 4.01E-01 | 1.85 | 0.93 | Pseudescherichia_vulneris_97       | Bacteria_Proteobacteria_Gammaproteobacteria_Enterobacterales_Enterobacteriaceae_89_Escherichia/Shigella_68      |
| OTU_836    | 7.57E-01 | 6.63E-01 | 3.50E-02 | 3.06 | 0.63 | Collinsella_aerofaciens_93         | Bacteria_Actinobacteria_98_Coriobacteriia_98_Coriobacteriales_98_Coriobacteriaceae_97_Collinsella_97            |
| OTU_8968   | 9.04E-01 | 7.66E-01 | 9.32E-02 | 2.62 | 1.10 | Bacteroides_xylanisolvens_97       | Bacteria_Bacteroidetes_Bacteroidia_Bacteroidales_Bacteroidaceae_Bacteroides_100                                 |
| OTU_1329   | 7.59E-01 | 6.57E-01 | 1.75E-01 | 2.83 | 1.35 | Prevotella_histicola_92            | Bacteria_Bacteroidetes_Bacteroidia_Bacteroidales_Prevotellaceae_96_Prevotella_95                                |
| OTU_13478  | 1.00E+00 | 6.04E-01 | 9.37E-01 | 1.46 | 1.52 | Enterocloster_citroniae_97         | Bacteria_Firmicutes_Clostridia_Clostridiales_Lachnospiraceae_Enterocloster_85                                   |
| OTU_2926   | 8.25E-01 | 6.04E-01 | 3.89E-02 | 1.04 | 2.39 | Phascolarctobacterium_faecium_97   | Bacteria_Firmicutes_Negativicutes_99_Acidaminococcales_99_Acidaminococcaceae_99_Phascolarctobacterium_99        |
| OTU_824    | 7.10E-01 | 6.04E-01 | 2.77E-01 | 0.65 | 0.34 | Collinsella_aerofaciens_96         | Bacteria_Actinobacteria_Coriobacteriia_Coriobacteriales_Coriobacteriaceae_Collinsella_99                        |
| OTU_15927  | 9.08E-01 | 9.69E-01 | 4.02E-01 | 1.53 | 1.20 | Enterocloster_citroniae_97         | Bacteria_Firmicutes_Clostridia_Clostridiales_Lachnospiraceae_Enterocloster_99                                   |
| OTU_3397   | 9.31E-01 | 7.01E-01 | 5.26E-01 | 1.16 | 1.39 | Enterococcus_faecalis_92           | Bacteria_Firmicutes_65_Bacilli_65_Lactobacillales_65_Carnobacteriaceae_40_Catelicoccus_30                       |
| OTU_6904   | 7.07E-01 | 7.99E-01 | 3.57E-01 | 0.47 | 1.33 | Pseudescherichia_vulneris_97       | Bacteria_Proteobacteria_Gammaproteobacteria_Enterobacterales_Enterobacteriaceae_Escherichia/Shigella_61         |
| OTU_7370   | 8.82E-01 | 9.25E-01 | 1.36E-01 | 1.32 | 2.06 | Pseudoflavonifractor_capillosus_97 | Bacteria_Firmicutes_Clostridia_Clostridiales_Ruminococcaceae_Flavonifractor_56                                  |
| OTU_8578   | 7.81E-01 | 9.25E-01 | 3.40E-02 | 1.19 | 2.38 | Paraclostridium_benzoelyticum_96   | Bacteria_Firmicutes_Clostridia_Clostridiales_Peptostreptococcaceae_99_Paraclostridium_96                        |
| OTU_1361   | 7.46E-01 | 6.14E-01 | 2.42E-02 | 3.06 | 0.44 | Fusobacterium_equinum_91           | Bacteria_Fusobacteria_Fusobacteriia_Fusobacteriales_Fusobacteriaceae_90_Cetobacterium_51                        |
| OTU_14617  | 7.91E-01 | 9.46E-01 | 4.02E-02 | 0.07 | 0.33 | Haemophilus_pittmaniae_99          | Bacteria_Proteobacteria_Gammaproteobacteria_Pasteurellales_Pasteurellaceae_Haemophilus_94                       |
| OTU_14689  | 9.67E-01 | 9.74E-01 | 4.58E-01 | 1.84 | 2.22 | Roseburia_inulinivorans_96         | Bacteria_Firmicutes_Clostridia_Clostridiales_Lachnospiraceae_99_Roseburia_65                                    |
| OTU_2521   | 9.04E-01 | 6.04E-01 | 7.88E-02 | 2.22 | 0.57 | Allobaculum_stercoricanis_87       | Bacteria_Firmicutes_Erysipelotrichia_Erysipelotrichales_Erysipelotrichaceae_Faecalibaculum_24                   |
| OTU_4059   | 7.10E-01 | 9.79E-01 | 5.82E-01 | 0.45 | 0.59 | Kineothrix_alysoides_95            | Bacteria_Firmicutes_Clostridia_Clostridiales_Lachnospiraceae_Clostridium_XIVa_50                                |
| OTU_4213   | 7.46E-01 | 9.81E-01 | 4.03E-03 | 2.94 | 0.71 | Clostridium_perfringens_93         | Bacteria_Proteobacteria_44_Gammaproteobacteria_44_Enterobacterales_44_Enterobacteriaceae_44_Pseudescherichia_44 |
| OTU_10439  | 7.46E-01 | 8.22E-01 | 9.27E-04 | 2.86 | 0.22 | Streptococcus_mitis_98             | Bacteria_Firmicutes_Bacilli_Lactobacillales_Streptococcaceae_Streptococcus_100                                  |
| OTU_1173   | 7.07E-01 | 9.06E-01 | 9.14E-02 | 1.76 | 0.35 | Streptococcus_gordonii_91          | Bacteria_Firmicutes_Bacilli_93_Lactobacillales_84_Carnobacteriaceae_29_Isobaculum_12                            |
| OTU_1191   | 7.91E-01 | 7.60E-01 | 3.27E-01 | 1.20 | 1.80 | Paraclostridium_benzoelyticum_93   | Bacteria_Firmicutes_Clostridia_Clostridiales_Peptostreptococcaceae_92_Paraclostridium_90                        |
| OTU_1196   | 7.12E-01 | 9.24E-01 | 3.48E-02 | 3.40 | 0.30 | Bacteroides_xylanisolvens_99       | Bacteria_Bacteroidetes_89_Bacteroidia_89_Bacteroidales_89_Bacteroidaceae_88_Mediterranea_46                     |
| OTU_291    | 7.07E-01 | 9.57E-01 | 2.64E-01 | 0.16 | 1.55 | Novosphingobium_fontis_99          | Bacteria_Proteobacteria_Alphaproteobacteria_Sphingomonadales_Erythrobacteraceae_94_Altererythrobacter_46        |
| OTU_3545   | 8.42E-01 | 6.04E-01 | 3.69E-03 | 2.54 | 0.85 | Clostridium_tarantellae_93         | Bacteria_Firmicutes_Clostridia_Clostridiales_Lachnospiraceae_75_Mobilitalea_22                                  |
| OTU_4546   | 8.25E-01 | 6.04E-01 | 6.41E-02 | 0.84 | 2.50 | Vibrio_porteressiae_86             | Bacteria_Proteobacteria_70_Gammaproteobacteria_70_Enterobacterales_70_Enterobacteriaceae_69_Pseudescherichia_66 |
| OTU_6828   | 7.73E-01 | 9.20E-01 | 4.28E-06 | 2.83 | 0.56 | Escherichia_coli_90                | Bacteria_Proteobacteria_87_Gammaproteobacteria_87_Enterobacterales_87_Enterobacteriaceae_87_Pseudescherichia_87 |
| OTU_79063  | 7.07E-01 | 8.02E-01 | 2.87E-02 | 4.00 | 0.30 | Bacteroides_stercoris_97           | Bacteria_Bacteroidetes_Bacteroidia_Bacteroidales_Bacteroidaceae_Bacteroides_100                                 |
| OTU_13638  | 8.96E-01 | 7.01E-01 | 1.87E-02 | 2.81 | 0.81 | Sutterella_massiliensis_94         | Bacteria_Proteobacteria_Gammaproteobacteria_60_Enterobacterales_59_Enterobacteriaceae_58_Pseudescherichia_55    |
| OTU_3956   | 9.84E-01 | 7.73E-01 | 4.26E-01 | 1.68 | 2.09 | Roseburia_inulinivorans_92         | Bacteria_Firmicutes_Clostridia_95_Clostridiales_95_Lachnospiraceae_95_Roseburia_30                              |
| OTU_322    | 7.57E-01 | 9.13E-01 | 7.47E-01 | 0.76 | 0.63 | Parasutterella_secunda_94          | Bacteria_Proteobacteria_Betaproteobacteria_Burkholderiales_Sutterellaceae_98_Duodenibacillus_88                 |
| OTU_4326   | 9.38E-01 | 6.04E-01 | 7.31E-01 | 1.48 | 1.36 | Enterococcus_faecalis_90           | Bacteria_Proteobacteria_86_Gammaproteobacteria_86_Enterobacterales_86_Enterobacteriaceae_86_Pseudescherichia_84 |
| OTU_690    | 7.11E-01 | 6.04E-01 | 2.98E-01 | 1.12 | 0.52 | Fusobacterium_mortiferum_94        | Bacteria_Fusobacteria_Fusobacteriia_Fusobacteriales_Fusobacteriaceae_99_Cetobacterium_62                        |
| OTU_814    | 7.07E-01 | 6.04E-01 | 6.60E-02 | 3.52 | 0.20 | Bacteroides_xylanisolvens_86       | Bacteria_Fusobacteria_80_Fusobacteriia_80_Fusobacteriales_80_Fusobacteriaceae_80_Cetobacterium_53               |
| OTU_9524   | 9.08E-01 | 6.32E-01 | 6.49E-01 | 1.37 | 1.63 | Xenorhabdus_ehlersii_88            | Bacteria_Proteobacteria_99_Gammaproteobacteria_99_Enterobacterales_98_Enterobacteriaceae_98_Pseudescherichia_96 |
| OTU_10026  | 7.93E-01 | 6.04E-01 | 4.56E-01 | 1.01 | 1.61 | Bacteroides_faecichinchillae_95    | Bacteria_Bacteroidetes_Bacteroidia_Bacteroidales_Bacteroidaceae_98_Bacteroides_98                               |
| OTU_1024   | 7.12E-01 | 9.25E-01 | 4.77E-01 | 0.38 | 0.25 | Faecalibacterium_prausnitzii_95    | Bacteria_Firmicutes_Clostridia_Clostridiales_Ruminococcaceae_Faecalibacterium_98                                |
| OTU_107455 | 7.46E-01 | 8.42E-01 | 9.84E-01 | 0.22 | 0.22 | Veillonella_tobetsuensis_97        | Bacteria_Firmicutes_Negativicutes_Veillonellales_Veillonellaceae_Veillonella_100                                |
| OTU_2125   | 7.73E-01 | 6.04E-01 | 8.24E-01 | 1.89 | 2.05 | Erysipelatoclostridium_amosum_96   | Bacteria_Firmicutes_Erysipelotrichia_Erysipelotrichales_Erysipelatoclostridiaceae_Erysipelatoclostridium_100    |
| OTU_2490   | 7.59E-01 | 6.04E-01 | 1.11E-01 | 2.30 | 1.18 | Faecalibacterium_prausnitzii_96    | Bacteria_Firmicutes_Clostridia_Clostridiales_Ruminococcaceae_Faecalibacterium_95                                |
| OTU_3740   | 8.49E-01 | 6.63E-01 | 5.10E-01 | 1.18 | 1.44 | Flavonifractor_plautii_95          | Bacteria_Firmicutes_Clostridia_Clostridiales_Ruminococcaceae_95_Flavonifractor_93                               |
| OTU_41212  | 7.07E-01 | 6.04E-01 | 3.21E-02 | 3.59 | 0.42 | Bacteroides_finegoldii_97          | Bacteria_Bacteroidetes_Bacteroidia_Bacteroidales_Bacteroidaceae_Bacteroides_100                                 |
| OTU_978    | 7.07E-01 | 7.10E-01 | 1.22E-01 | 2.62 | 0.87 | Kosakonia_sacchari_91              | Bacteria_Proteobacteria_96_Gammaproteobacteria_96_Enterobacterales_95_Enterobacteriaceae_95_Pseudescherichia_92 |
| OTU_2048   | 7.10E-01 | 6.04E-01 | 3.00E-02 | 3.23 | 0.69 | Bacteroides_clarus_98              | Bacteria_Bacteroidetes_Bacteroidia_Bacteroidales_Bacteroidaceae_Bacteroides_100                                 |
| OTU_27719  | 7.59E-01 | 9.42E-01 | 1.19E-02 | 1.78 | 0.22 | Bifidobacterium_stercoris_98       | Bacteria_Actinobacteria_Actinobacteria_Bifidobacteriales_Bifidobacteriaceae_Bifidobacterium_88                  |



|            |          |          |          |      |      |                                     |                                                                                                                 |
|------------|----------|----------|----------|------|------|-------------------------------------|-----------------------------------------------------------------------------------------------------------------|
| OTU_30480  | 9.48E-01 | 9.19E-01 | 5.15E-03 | 0.74 | 2.56 | Veillonella_dispar_96               | Bacteria_Firmicutes_Negativicutes_Veillonellales_Veillonellaceae_Veillonella_98                                 |
| OTU_3118   | 9.78E-01 | 8.28E-01 | 6.00E-01 | 1.75 | 2.05 | Coproccoccus_comes_96               | Bacteria_Firmicutes_Clostridia_Clostridiales_Lachnospiraceae_Bariatricus_60                                     |
| OTU_3627   | 8.31E-01 | 9.18E-01 | 5.67E-01 | 1.52 | 1.81 | Escherichia_albertii_89             | Bacteria_Proteobacteria_80_Gammaproteobacteria_80_Enterobacterales_80_Enterobacteriaceae_78_Pseudescherichia_78 |
| OTU_553    | 7.57E-01 | 7.50E-01 | 8.00E-01 | 1.32 | 1.66 | Anaerotignum_aminivorans_97         | Bacteria_Firmicutes_Clostridia_Clostridiales_Lachnospiraceae_Anaerotignum_100                                   |
| OTU_8125   | 9.14E-01 | 6.04E-01 | 4.41E-02 | 1.29 | 2.20 | Enterocloster_clostridioformis_96   | Bacteria_Firmicutes_Clostridia_Clostridiales_Lachnospiraceae_Enterocloster_76                                   |
| OTU_9554   | 9.67E-01 | 6.83E-01 | 7.21E-01 | 1.90 | 1.74 | Enterocloster_clostridioformis_89   | Bacteria_Proteobacteria_58_Gammaproteobacteria_58_Enterobacterales_58_Enterobacteriaceae_58_Pseudescherichia_57 |
| OTU_1003   | 8.67E-01 | 6.05E-01 | 1.78E-01 | 1.11 | 0.49 | Catenibacterium_mitsuokai_96        | Bacteria_Firmicutes_90_Erysipelotrichia_90_Erysipelotrichales_90_Erysipelotrichaceae_90_Catenibacterium_73      |
| OTU_2058   | 9.99E-01 | 6.04E-01 | 1.75E-01 | 1.73 | 0.97 | Peptoniphilus_grossensis_98         | Bacteria_Firmicutes_Clostridia_90_Clostridiales_90_Peptoniphilaceae_89_Peptoniphilus_88                         |
| OTU_4335   | 7.59E-01 | 6.04E-01 | 9.60E-01 | 1.71 | 1.67 | Pseudoflavonifractor_capillosus_98  | Bacteria_Firmicutes_Clostridia_Clostridiales_Ruminococcaceae_Pseudoflavonifractor_100                           |
| OTU_1271   | 7.57E-01 | 6.04E-01 | 1.18E-01 | 4.30 | 0.36 | Vallitalea_pronyensis_86            | Bacteria_Firmicutes_98_Clostridia_81_Clostridiales_81_Tissierellaceae_18_Gudongella_12                          |
| OTU_1482   | 7.07E-01 | 6.04E-01 | 1.81E-01 | 2.86 | 0.62 | Streptococcus_porcorum_88           | Bacteria_Proteobacteria_88_Gammaproteobacteria_88_Enterobacterales_87_Enterobacteriaceae_87_Pseudescherichia_84 |
| OTU_1511   | 7.07E-01 | 7.42E-01 | 7.67E-02 | 0.47 | 1.20 | Veillonella_atypica_98              | Bacteria_Firmicutes_Negativicutes_85_Veillonellales_79_Veillonellaceae_79_Veillonella_75                        |
| OTU_31940  | 7.07E-01 | 6.66E-01 | 7.26E-02 | 1.68 | 0.71 | Veillonella_atypica_94              | Bacteria_Firmicutes_Negativicutes_98_Veillonellales_97_Veillonellaceae_97_Veillonella_97                        |
| OTU_3425   | 9.60E-01 | 7.99E-01 | 5.04E-02 | 2.20 | 0.88 | Enterocloster_clostridioformis_97   | Bacteria_Firmicutes_Clostridia_Clostridiales_Lachnospiraceae_Enterocloster_98                                   |
| OTU_3881   | 9.37E-01 | 6.04E-01 | 3.04E-01 | 1.30 | 1.84 | Escherichia_albertii_90             | Bacteria_Firmicutes_54_Clostridia_54_Clostridiales_54_Lachnospiraceae_54_Hungatella_49                          |
| OTU_400    | 8.25E-01 | 6.04E-01 | 4.71E-02 | 3.74 | 0.42 | Intestinimonas_butyriciproducens_93 | Bacteria_Firmicutes_Clostridia_Clostridiales_Ruminococcaceae_Lawsonibacter_16                                   |
| OTU_81311  | 7.07E-01 | 9.58E-01 | 9.22E-02 | 3.70 | 0.39 | Bacteroides_stercoris_97            | Bacteria_Bacteroidetes_Bacteroidia_Bacteroidales_Bacteroidaceae_Bacteroides_100                                 |
| OTU_1109   | 8.77E-01 | 7.51E-01 | 2.96E-01 | 1.94 | 1.16 | Shigella_boydii_90                  | Bacteria_Proteobacteria_Gammaproteobacteria_Enterobacterales_Enterobacteriaceae_Pseudescherichia_89             |
| OTU_1491   | 7.07E-01 | 6.14E-01 | 5.24E-02 | 3.51 | 0.16 | Bacteroides_stercoris_99            | Bacteria_Bacteroidetes_86_Bacteroidia_86_Bacteroidales_86_Bacteroidaceae_85_Mediterranea_65                     |
| OTU_39297  | 8.16E-01 | 8.23E-01 | 6.66E-04 | 3.70 | 0.09 | Bacteroides_uniformis_96            | Bacteria_Bacteroidetes_Bacteroidia_Bacteroidales_Bacteroidaceae_Bacteroides_99                                  |
| OTU_50204  | 7.46E-01 | 9.74E-01 | 7.31E-03 | 0.78 | 1.96 | Shigella_dysenteriae_95             | Bacteria_Proteobacteria_Gammaproteobacteria_Enterobacterales_Enterobacteriaceae_Escherichia/Shigella_60         |
| OTU_5948   | 7.59E-01 | 6.14E-01 | 2.42E-01 | 2.08 | 1.24 | Phocaeicola_vulgatus_97             | Bacteria_Bacteroidetes_Bacteroidia_Bacteroidales_Bacteroidaceae_Phocaeicola_58                                  |
| OTU_621    | 9.92E-01 | 6.04E-01 | 1.05E-01 | 0.37 | 0.07 | Collinsella_aerofaciens_100         | Bacteria_Actinobacteria_92_Coriobacteriia_92_Coriobacteriales_91_Coriobacteriaceae_90_Collinsella_87            |
| OTU_622    | 9.26E-01 | 6.04E-01 | 1.35E-02 | 1.16 | 0.16 | Megasphaera_elsdenii_98             | Bacteria_Firmicutes_Negativicutes_69_Veillonellales_69_Veillonellaceae_69_Megasphaera_68                        |
| OTU_10292  | 9.95E-01 | 8.73E-01 | 5.50E-01 | 1.63 | 1.90 | Coproccoccus_comes_92               | Bacteria_Firmicutes_96_Clostridia_96_Clostridiales_96_Lachnospiraceae_96_Bariatricus_59                         |
| OTU_11432  | 8.06E-01 | 7.99E-01 | 9.22E-02 | 0.85 | 2.28 | Dickeya_chrysanthemi_89             | Bacteria_Proteobacteria_87_Gammaproteobacteria_87_Enterobacterales_87_Enterobacteriaceae_86_Pseudescherichia_83 |
| OTU_114383 | 7.07E-01 | NA       | 1.05E-01 | 4.24 | 0.00 | Bacteroides_stercoris_97            | Bacteria_Bacteroidetes_Bacteroidia_Bacteroidales_Bacteroidaceae_Bacteroides_100                                 |
| OTU_13300  | 1.00E+00 | 7.88E-01 | 9.53E-02 | 1.01 | 2.11 | Nitrincola_lacisaponensis_87        | Bacteria_Proteobacteria_93_Gammaproteobacteria_93_Enterobacterales_92_Enterobacteriaceae_89_Pseudescherichia_88 |
| OTU_15690  | 9.64E-01 | 9.46E-01 | 8.37E-02 | 1.30 | 1.92 | Hungatella_effluvi_97               | Bacteria_Firmicutes_Clostridia_Clostridiales_Lachnospiraceae_Hungatella_72                                      |
| OTU_1707   | 8.97E-01 | 6.04E-01 | 9.72E-01 | 1.41 | 1.43 | Ruminococcus_gnavus_94              | Bacteria_Firmicutes_Clostridia_Clostridiales_Lachnospiraceae_94_Dorea_89                                        |
| OTU_1768   | 9.78E-01 | 6.04E-01 | 6.30E-01 | 1.46 | 1.81 | Acidaminococcus_fermentans_98       | Bacteria_Firmicutes_Negativicutes_93_Acidaminococcales_93_Acidaminococcaceae_93_Acidaminococcus_92              |
| OTU_273    | 7.91E-01 | 6.04E-01 | 1.87E-01 | 1.20 | 0.21 | Kineothrix_alysoides_90             | Bacteria_Firmicutes_Clostridia_Clostridiales_Lachnospiraceae_Eisenbergiella_17                                  |
| OTU_36382  | 7.59E-01 | 8.28E-01 | 1.92E-03 | 2.51 | 0.72 | Clostridium_perfringens_93          | Bacteria_Firmicutes_Clostridia_Clostridiales_Lachnospiraceae_59_Mobilitalea_9                                   |
| OTU_4319   | 7.07E-01 | 6.72E-01 | 3.66E-05 | 2.45 | 0.58 | Ruminococcus_torques_94             | Bacteria_Firmicutes_Clostridia_Clostridiales_Lachnospiraceae_98_Coproccoccus_50                                 |
| OTU_48983  | 8.85E-01 | 8.02E-01 | 1.67E-03 | 3.65 | 0.16 | Bacteroides_xylanisolvens_98        | Bacteria_Bacteroidetes_Bacteroidia_Bacteroidales_Bacteroidaceae_Bacteroides_100                                 |
| OTU_5172   | 9.84E-01 | 9.75E-01 | 4.10E-01 | 1.56 | 2.04 | Coproccoccus_comes_95               | Bacteria_Firmicutes_Clostridia_Clostridiales_Lachnospiraceae_Coproccoccus_59                                    |
| OTU_6070   | 1.00E+00 | 9.42E-01 | 4.58E-01 | 1.59 | 1.28 | Hungatella_hathewayi_92             | Bacteria_Firmicutes_Clostridia_75_Clostridiales_75_Lachnospiraceae_75_Falcatimonas_43                           |
| OTU_1038   | 9.06E-01 | 6.04E-01 | 8.30E-01 | 0.52 | 0.58 | Phocaeicola_coprophilus_99          | Bacteria_Bacteroidetes_98_Bacteroidia_98_Bacteroidales_98_Bacteroidaceae_98_Phocaeicola_89                      |
| OTU_10453  | 8.82E-01 | 9.73E-01 | 9.96E-03 | 2.29 | 0.94 | Escherichia_albertii_90             | Bacteria_Proteobacteria_76_Gammaproteobacteria_76_Enterobacterales_75_Enterobacteriaceae_75_Pseudescherichia_74 |
| OTU_11625  | 1.00E+00 | 8.45E-01 | 3.34E-01 | 1.55 | 1.23 | Bacteroides_fragilis_96             | Bacteria_Bacteroidetes_Bacteroidia_Bacteroidales_Bacteroidaceae_Bacteroides_100                                 |
| OTU_14889  | 8.06E-01 | 8.14E-01 | 1.16E-02 | 0.65 | 2.14 | Bacteroides_finegoldii_95           | Bacteria_Bacteroidetes_Bacteroidia_Bacteroidales_Bacteroidaceae_Bacteroides_83                                  |
| OTU_1513   | 7.93E-01 | 6.04E-01 | 5.24E-01 | 0.56 | 0.77 | Bacteroides_kribbi_97               | Bacteria_Bacteroidetes_Bacteroidia_Bacteroidales_Bacteroidaceae_Bacteroides_89                                  |
| OTU_3038   | 7.97E-01 | 8.83E-01 | 4.09E-01 | 1.35 | 1.72 | Enterocloster_aldenensis_95         | Bacteria_Firmicutes_Clostridia_Clostridiales_Lachnospiraceae_Enterocloster_50                                   |
| OTU_3567   | 7.57E-01 | 6.76E-01 | 2.08E-01 | 2.21 | 1.48 | Roseburia_inulinivorans_96          | Bacteria_Firmicutes_Clostridia_Clostridiales_Lachnospiraceae_Roseburia_56                                       |
| OTU_816    | 9.99E-01 | 6.10E-01 | 1.95E-02 | 2.85 | 0.58 | Clostridium_symbiosum_97            | Bacteria_Firmicutes_97_Clostridia_97_Clostridiales_97_Lachnospiraceae_96_Clostridium_XIVa_34                    |
| OTU_8612   | 9.43E-01 | 6.04E-01 | 1.87E-01 | 1.57 | 1.10 | Faecalicatena_erotica_96            | Bacteria_Firmicutes_Clostridia_Clostridiales_Lachnospiraceae_Clostridium_XIVa_89                                |
| OTU_1076   | 9.80E-01 | 8.14E-01 | 6.59E-03 | 1.64 | 0.68 | Enterococcus_pseudoavium_90         | Bacteria_Firmicutes_Clostridia_93_Clostridiales_93_Lachnospiraceae_93_Dorea_85                                  |
| OTU_11077  | 7.07E-01 | 6.30E-01 | 5.05E-02 | 1.26 | 2.08 | Enterocloster_aldenensis_94         | Bacteria_Firmicutes_Clostridia_Clostridiales_Lachnospiraceae_Enterocloster_51                                   |
| OTU_1554   | 1.00E+00 | 9.54E-01 | 8.51E-01 | 1.36 | 1.28 | Dorea_longicatena_92                | Bacteria_Firmicutes_85_Clostridia_85_Clostridiales_85_Lachnospiraceae_85_Dorea_81                               |
| OTU_2399   | 8.82E-01 | 9.14E-01 | 3.74E-02 | 1.85 | 0.94 | Ruminococcus_bromii_98              | Bacteria_Firmicutes_Clostridia_Clostridiales_Ruminococcaceae_Ruminococcus_88                                    |
| OTU_65108  | 8.70E-01 | 6.57E-01 | 8.70E-04 | 0.55 | 2.94 | Mobilitalea_sibirica_88             | Bacteria_Bacteroidetes_68_Bacteroidia_68_Bacteroidales_68_Bacteroidaceae_68_Bacteroides_55                      |
| OTU_930    | 9.72E-01 | 6.05E-01 | 4.59E-02 | 0.78 | 0.25 | Sutterella_wadsworthensis_99        | Bacteria_Proteobacteria_98_Betaproteobacteria_98_Burkholderiales_98_Sutterellaceae_98_Sutterella_95             |
| OTU_9405   | 9.38E-01 | 6.04E-01 | 1.32E-02 | 2.52 | 0.77 | Pseudescherichia_vulneris_97        | Bacteria_Proteobacteria_Gammaproteobacteria_Enterobacterales_Enterobacteriaceae_Escherichia/Shigella_89         |
| OTU_25004  | 7.07E-01 | 9.94E-01 | 1.03E-01 | 1.02 | 1.75 | Enterococcus_faecalis_98            | Bacteria_Firmicutes_Bacilli_Lactobacillales_99_Enterococcaceae_93_Enterococcus_72                               |
| OTU_45442  | 8.85E-01 | 9.46E-01 | 1.99E-01 | 1.35 | 1.87 | Shigella_dysenteriae_97             | Bacteria_Proteobacteria_Gammaproteobacteria_Enterobacterales_Enterobacteriaceae_Escherichia/Shigella_67         |
| OTU_525    | 7.24E-01 | 7.67E-01 | 1.34E-01 | 2.97 | 0.14 | Lacrimispora_sacharolytica_95       | Bacteria_Firmicutes_Clostridia_Clostridiales_Lachnospiraceae_Clostridium_XIVa_32                                |
| OTU_646    | 7.14E-01 | 6.04E-01 | 6.92E-02 | 3.10 | 0.33 | Clostridium_cadaveris_96            | Bacteria_Firmicutes_Clostridia_Clostridiales_Clostridiaceae_1_Anaerobacter_41                                   |
| OTU_7015   | 9.98E-01 | 7.24E-01 | 9.96E-01 | 0.51 | 0.51 | Faecalibacterium_prausnitzii_92     | Bacteria_Firmicutes_Clostridia_Clostridiales_Ruminococcaceae_86_Faecalibacterium_72                             |
| OTU_92099  | 9.31E-01 | 7.20E-01 | 4.53E-02 | 2.76 | 0.62 | Bacteroides_xylanisolvens_97        | Bacteria_Bacteroidetes_Bacteroidia_Bacteroidales_Bacteroidaceae_Bacteroides_100                                 |
| OTU_1916   | 8.60E-01 | 9.44E-01 | 4.32E-03 | 0.75 | 2.13 | Enterococcus_faecalis_91            | Bacteria_Firmicutes_75_Bacilli_74_Lactobacillales_73_Carnobacteriaceae_51_Catellibacterium_29                   |
| OTU_2838   | 9.83E-01 | 6.04E-01 | 3.92E-02 | 2.49 | 1.26 | Bacteroides_xylanisolvens_96        | Bacteria_Firmicutes_53_Bacilli_53_Lactobacillales_49_Carnobacteriaceae_43_Catellibacterium_39                   |
| OTU_3033   | 9.75E-01 | 7.02E-01 | 7.31E-02 | 1.79 | 1.04 | Enterococcus_dispar_100             | Bacteria_Firmicutes_Bacilli_93_Lactobacillales_91_Carnobacteriaceae_58_Isobaculum_57                            |
| OTU_3833   | 9.20E-01 | 9.06E-01 | 1.53E-01 | 1.15 | 2.36 | Mobilitalea_sibirica_89             | Bacteria_Firmicutes_73_Clostridia_73_Clostridiales_73_Lachnospiraceae_73_Bariatricus_65                         |
| OTU_4248   | 9.87E-01 | 8.46E-01 | 4.12E-02 | 2.13 | 1.18 | Roseburia_inulinivorans_93          | Bacteria_Firmicutes_99_Clostridia_99_Clostridiales_99_Lachnospiraceae_99_Roseburia_74                           |
| OTU_4625   | 8.24E-01 | 9.35E-01 | 5.61E-01 | 0.24 | 0.38 | Phocaeicola_coprocola_96            | Bacteria_Bacteroidetes_Bacteroidia_Bacteroidales_Bacteroidaceae_Phocaeicola_100                                 |
| OTU_1891   | 9.00E-01 | 7.66E-01 | 9.49E-03 | 3.29 | 0.16 | Bifidobacterium_breve_89            | Bacteria_Actinobacteria_96_Actinobacteria_96_Bifidobacteriales_96_Bifidobacteriaceae_96_Pseudoscardovia_41      |
| OTU_3775   | 7.07E-01 | 8.22E-01 | 1.52E-02 | 2.20 | 0.26 | Parabacteroides_merdae_97           | Bacteria_Bacteroidetes_Bacteroidia_Bacteroidales_Porphoryomonadaceae_99_Parabacteroides_99                      |

|           |          |          |          |      |      |                                     |                                                                                                                      |
|-----------|----------|----------|----------|------|------|-------------------------------------|----------------------------------------------------------------------------------------------------------------------|
| OTU_4570  | 9.62E-01 | 6.10E-01 | 5.27E-02 | 2.37 | 1.08 | Roseburia_inulinivorans_96          | Bacteria_Firmicutes_Clostridia_Clostridiales_Lachnospiraceae_Bariatricus_53                                          |
| OTU_665   | 7.62E-01 | 8.68E-01 | 1.57E-01 | 0.57 | 0.19 | Collinsella_aerofaciens_99          | Bacteria_Actinobacteria_99_Coriobacteria_99_Coriobacteriales_99_Coriobacteriaceae_99_Collinsella_98                  |
| OTU_7369  | 8.33E-01 | 7.30E-01 | 1.71E-02 | 2.15 | 1.03 | Clostridium_perfringens_94          | Bacteria_Firmicutes_Clostridia_Clostridiales_Clostridiaceae_1_78_Desnuesiella_40                                     |
| OTU_26296 | 9.84E-01 | 7.77E-01 | 5.09E-01 | 1.49 | 1.13 | Bacteroides_thetaiotaomicron_96     | Bacteria_Bacteroidetes_Bacteroidia_Bacteroidales_Bacteroidaceae_Bacteroides_94                                       |
| OTU_3315  | 7.80E-01 | 9.25E-01 | 1.29E-01 | 2.16 | 1.37 | Clostridium_perfringens_96          | Bacteria_Firmicutes_Clostridia_Clostridiales_Clostridiaceae_1_88_Sarcina_49                                          |
| OTU_3886  | 7.94E-01 | 9.41E-01 | 8.41E-02 | 0.94 | 2.16 | Pseudescherichia_vulneris_94        | Bacteria_Proteobacteria_98_Gammaproteobacteria_98_Enterobacterales_98_Enterobacteriaceae_97_Pseudescherichia_52      |
| OTU_4792  | 9.87E-01 | 6.65E-01 | 8.23E-01 | 1.53 | 1.42 | Hungatella_hathewayi_100            | Bacteria_Firmicutes_Clostridia_Clostridiales_Lachnospiraceae_Hungatella_100                                          |
| OTU_1577  | 8.33E-01 | 6.04E-01 | 1.27E-01 | 2.02 | 0.87 | Veillonella_parvula_98              | Bacteria_Firmicutes_Negativicutes_Veillonellales_Veillonellaceae_Veillonella_100                                     |
| OTU_24213 | 8.73E-01 | 9.46E-01 | 8.26E-03 | 0.82 | 2.71 | Bacteroides_kribbi_97               | Bacteria_Bacteroidetes_Bacteroidia_Bacteroidales_Bacteroidaceae_Bacteroides_100                                      |
| OTU_2728  | 7.57E-01 | 6.05E-01 | 1.30E-01 | 1.36 | 0.75 | Blautia_hydrogenotrophica_92        | Bacteria_Firmicutes_Clostridia_78_Clostridiales_78_Lachnospiraceae_78_Lactonifactor_13                               |
| OTU_3216  | 8.74E-01 | 7.40E-01 | 2.01E-03 | 2.19 | 0.71 | Clostridium_carnis_90               | Bacteria_Proteobacteria_85_Gammaproteobacteria_85_Enterobacterales_83_Enterobacteriaceae_83_Pseudescherichia_77      |
| OTU_3520  | 7.07E-01 | 6.14E-01 | 1.95E-04 | 2.43 | 0.37 | Bifidobacterium_dentium_87          | Bacteria_Proteobacteria_89_Gammaproteobacteria_89_Enterobacterales_89_Enterobacteriaceae_89_Pseudescherichia_81      |
| OTU_40735 | 9.43E-01 | 9.32E-01 | 6.25E-04 | 3.14 | 0.39 | Bacteroides_faecis_97               | Bacteria_Bacteroidetes_Bacteroidia_Bacteroidales_Bacteroidaceae_Bacteroides_100                                      |
| OTU_4501  | 8.43E-01 | 6.72E-01 | 1.83E-01 | 1.43 | 2.11 | Blautia_faecicola_95                | Bacteria_Firmicutes_Clostridia_Clostridiales_Lachnospiraceae_Kineothrix_23                                           |
| OTU_492   | NA       | 8.46E-01 | 1.75E-01 | 0.00 | 2.48 | Hydrogenophaga_laconesensis_100     | Bacteria_Proteobacteria_Betaproteobacteria_Burkholderiales_Comamonadaceae_Hydrogenophaga_100                         |
| OTU_572   | NA       | 9.25E-01 | 2.21E-01 | 0.00 | 3.55 | Desulfovibrio_butyratiphilus_97     | Bacteria_Proteobacteria_Deltaproteobacteria_Desulfovibrionales_Desulfovibrionaceae_Desulfovibrio_99                  |
| OTU_712   | 7.07E-01 | 6.72E-01 | 1.47E-01 | 0.56 | 0.21 | Slackia_isoflavoniconvertens_91     | Bacteria_Actinobacteria_Coriobacteria_97_Eggerthellales_97_Eggerthellaceae_97_Slackia_97                             |
| OTU_11056 | 9.45E-01 | 6.05E-01 | 3.82E-02 | 2.39 | 0.82 | Pseudescherichia_vulneris_94        | Bacteria_Proteobacteria_Gammaproteobacteria_83_Enterobacterales_83_Enterobacteriaceae_83_Pseudescherichia_80         |
| OTU_1179  | 9.08E-01 | 8.95E-01 | 8.33E-01 | 0.31 | 0.28 | Faecalibacterium_prausnitzii_94     | Bacteria_Firmicutes_Clostridia_Clostridiales_Ruminococcaceae_91_Faecalibacterium_86                                  |
| OTU_13185 | 7.07E-01 | 7.78E-01 | 3.74E-02 | 3.48 | 0.38 | Bacteroides_stercoris_97            | Bacteria_Bacteroidetes_Bacteroidia_Bacteroidales_Bacteroidaceae_Bacteroides_100                                      |
| OTU_1417  | 7.07E-01 | 8.46E-01 | 9.29E-02 | 0.58 | 0.16 | Phocaeicola_vulgatus_94             | Bacteria_Bacteroidetes_Bacteroidia_Bacteroidales_Bacteroidaceae_89_Phocaeicola_89                                    |
| OTU_1527  | 9.65E-01 | 9.35E-01 | 4.27E-01 | 1.97 | 1.60 | Roseburia_inulinivorans_93          | Bacteria_Firmicutes_Clostridia_Clostridiales_Lachnospiraceae_59_Roseburia_46                                         |
| OTU_16829 | 7.22E-01 | 6.72E-01 | 1.71E-02 | 2.00 | 0.50 | Collinsella_aerofaciens_91          | Bacteria_Actinobacteria_68_Coriobacteriia_68_Coriobacteriales_68_Coriobacteriaceae_62_Collinsella_61                 |
| OTU_1713  | 7.91E-01 | 9.09E-01 | 1.25E-01 | 1.62 | 2.30 | Bacteroides_thetaiotaomicron_95     | Bacteria_Bacteroidetes_Bacteroidia_Bacteroidales_Bacteroidaceae_Bacteroides_99                                       |
| OTU_20100 | 7.57E-01 | 9.89E-01 | 2.06E-01 | 2.01 | 1.21 | Veillonella_parvula_98              | Bacteria_Firmicutes_Negativicutes_Veillonellales_Veillonellaceae_Veillonella_100                                     |
| OTU_3617  | 7.80E-01 | 7.14E-01 | 1.76E-03 | 2.69 | 0.75 | Clostridium_tarantellae_92          | Bacteria_Firmicutes_Clostridia_Clostridiales_Lachnospiraceae_79_Ruminococcus2_22                                     |
| OTU_397   | NA       | 6.72E-01 | 2.01E-01 | 0.00 | 3.18 | Methylothera_mobilis_96             | Bacteria_Proteobacteria_Betaproteobacteria_Nitrosomonadales_Methylophilaceae_Methylothera_86                         |
| OTU_1050  | 9.96E-01 | 8.75E-01 | 2.13E-01 | 0.34 | 0.18 | Bifidobacterium_callitrichidarum_92 | Bacteria_Actinobacteria_91_Actinobacteria_91_Bifidobacteriales_91_Bifidobacteriaceae_91_Bifidobacterium_55           |
| OTU_64838 | 8.57E-01 | 7.38E-01 | 7.86E-02 | 0.94 | 1.45 | Enterococcus_faecalis_98            | Bacteria_Firmicutes_Bacilli_Lactobacillales_Enterococcaceae_99_Enterococcus_78                                       |
| OTU_8337  | 8.60E-01 | 9.75E-01 | 5.52E-01 | 1.46 | 1.74 | Anaerotaenia_torta_89               | Bacteria_Firmicutes_55_Clostridia_55_Clostridiales_55_Lachnospiraceae_55_Murimonas_12                                |
| OTU_1023  | 7.07E-01 | 8.18E-01 | 6.71E-01 | 0.09 | 0.16 | Bifidobacterium_stercoris_97        | Bacteria_Actinobacteria_81_Actinobacteria_81_Bifidobacteriales_81_Bifidobacteriaceae_81_Pseudoscardovia_42           |
| OTU_13998 | 7.91E-01 | 6.35E-01 | 3.58E-01 | 1.12 | 1.44 | Pseudescherichia_vulneris_96        | Bacteria_Proteobacteria_Gammaproteobacteria_Enterobacterales_Enterobacteriaceae_Escherichia/Shigella_60              |
| OTU_1711  | 7.07E-01 | 6.83E-01 | 1.71E-02 | 2.38 | 0.93 | Coprococcus_comes_95                | Bacteria_Firmicutes_Clostridia_Clostridiales_Lachnospiraceae_Coprococcus_47                                          |
| OTU_1773  | 7.07E-01 | 8.45E-01 | 9.22E-02 | 1.06 | 2.14 | Kosakonia_sachari_88                | Bacteria_Firmicutes_61_Clostridia_61_Clostridiales_61_Ruminococcaceae_61_Faecalibacterium_37                         |
| OTU_19875 | 7.07E-01 | 6.04E-01 | 3.89E-01 | 1.18 | 1.51 | Enterococcus_faecalis_98            | Bacteria_Firmicutes_Bacilli_Lactobacillales_Enterococcaceae_93_Enterococcus_58                                       |
| OTU_2066  | 9.99E-01 | 6.04E-01 | 1.50E-02 | 0.99 | 0.17 | Enterodoster_citroniae_98           | Bacteria_Firmicutes_74_Clostridia_74_Clostridiales_74_Lachnospiraceae_74_Enterocloster_36                            |
| OTU_28616 | 9.39E-01 | 8.14E-01 | 5.32E-04 | 0.69 | 2.53 | Bacteroides_thetaiotaomicron_100    | Bacteria_Bacteroidetes_98_Bacteroidia_98_Bacteroidales_98_Bacteroidaceae_98_Bacteroides_98                           |
| OTU_2953  | 8.31E-01 | 6.04E-01 | 1.50E-03 | 1.71 | 0.24 | Bifidobacterium_stercoris_95        | Bacteria_Actinobacteria_92_Actinobacteria_92_Bifidobacteriales_92_Bifidobacteriaceae_92_Bifidobacterium_59           |
| OTU_30180 | 8.68E-01 | 7.22E-01 | 1.12E-01 | 0.81 | 1.37 | Veillonella_disspar_96              | Bacteria_Firmicutes_Negativicutes_Veillonellales_Veillonellaceae_70_Veillonella_70                                   |
| OTU_30592 | 9.99E-01 | 9.41E-01 | 4.46E-03 | 0.72 | 0.07 | Bacteroides_caccae_96               | Bacteria_Bacteroidetes_Bacteroidia_Bacteroidales_Bacteroidaceae_Bacteroides_97                                       |
| OTU_565   | 7.07E-01 | 6.04E-01 | 3.06E-02 | 1.61 | 0.16 | Clostridium_tarantellae_91          | Bacteria_Firmicutes_Clostridia_77_Clostridiales_77_Clostridiaceae_1_77_Sarcina_31                                    |
| OTU_885   | 9.37E-01 | 8.51E-01 | 1.07E-01 | 2.79 | 0.31 | Kineothrix_allysoides_97            | Bacteria_Firmicutes_Clostridia_Clostridiales_Lachnospiraceae_Kineothrix_58                                           |
| OTU_1955  | 7.57E-01 | 6.04E-01 | 8.23E-01 | 1.63 | 1.78 | Erysipelatoclostridium_amosum_97    | Bacteria_Firmicutes_Erysipelotrichia_Erysipelotrichales_Erysipelatoclostridiaceae_Erysipelatoclostridium_100         |
| OTU_70254 | 7.85E-01 | 6.63E-01 | 3.74E-03 | 2.92 | 0.51 | Roseburia_inulinivorans_93          | Bacteria_Firmicutes_Clostridia_Clostridiales_Lachnospiraceae_77_Coprococcus_14                                       |
| OTU_1031  | 9.04E-01 | 7.36E-01 | 6.33E-01 | 1.04 | 0.88 | Flavonifractor_plautii_97           | Bacteria_Firmicutes_Clostridia_Clostridiales_Ruminococcaceae_Flavonifractor_100                                      |
| OTU_1152  | 7.85E-01 | 8.37E-01 | 8.51E-01 | 1.17 | 1.25 | Blautia_coccoides_96                | Bacteria_Firmicutes_Clostridia_Clostridiales_Lachnospiraceae_Blautia_100                                             |
| OTU_1463  | 7.57E-01 | 6.73E-01 | 1.43E-01 | 1.23 | 2.25 | Erysipelatoclostridium_amosum_98    | Bacteria_Firmicutes_Erysipelotrichia_94_Erysipelotrichales_94_Erysipelatoclostridiaceae_92_Erysipelatoclostridium_92 |
| OTU_14693 | 9.14E-01 | 9.27E-01 | 8.15E-02 | 1.01 | 1.97 | Anaerotaenia_torta_89               | Bacteria_Proteobacteria_81_Gammaproteobacteria_81_Enterobacterales_81_Enterobacteriaceae_80_Pseudescherichia_75      |
| OTU_19704 | 7.50E-01 | 6.04E-01 | 1.62E-02 | 1.95 | 0.70 | Veillonella_parvula_98              | Bacteria_Firmicutes_Negativicutes_Veillonellales_Veillonellaceae_Veillonella_100                                     |
| OTU_2661  | 7.57E-01 | 9.72E-01 | 6.15E-01 | 1.92 | 1.64 | Bacteroides_xylanisolvens_96        | Bacteria_Bacteroidetes_Bacteroidia_Bacteroidales_Bacteroidaceae_Bacteroides_100                                      |
| OTU_4148  | 1.00E+00 | 6.04E-01 | 1.60E-02 | 2.47 | 0.84 | Escherichia_albertii_88             | Bacteria_Proteobacteria_60_Gammaproteobacteria_60_Enterobacterales_60_Enterobacteriaceae_60_Pseudescherichia_60      |
| OTU_453   | 7.10E-01 | 6.04E-01 | 1.15E-01 | 0.65 | 0.09 | Megasphaera_elsdenii_98             | Bacteria_Firmicutes_79_Negativicutes_79_Veillonellales_79_Veillonellaceae_79_Megasphaera_76                          |
| OTU_1163  | 7.16E-01 | 9.73E-01 | 1.50E-02 | 1.82 | 0.37 | Escherichia_coli_88                 | Bacteria_Proteobacteria_64_Gammaproteobacteria_64_Enterobacterales_64_Enterobacteriaceae_64_Pseudescherichia_64      |
| OTU_1279  | 7.57E-01 | 6.04E-01 | 1.40E-02 | 2.85 | 0.12 | Lactobacillus_johnsonii_95          | Bacteria_Firmicutes_Bacilli_Lactobacillales_96_Lactobacillaceae_62_Lactobacillus_60                                  |
| OTU_19891 | 8.57E-01 | 9.69E-01 | 4.69E-01 | 1.76 | 1.40 | Enterococcus_thailandicus_97        | Bacteria_Firmicutes_Bacilli_Lactobacillales_Enterococcaceae_85_Enterococcus_47                                       |
| OTU_31631 | 8.85E-01 | 9.61E-01 | 5.31E-01 | 1.22 | 0.91 | Coprococcus_comes_96                | Bacteria_Firmicutes_Clostridia_Clostridiales_Lachnospiraceae_Coprococcus_38                                          |
| OTU_32402 | 7.07E-01 | 6.04E-01 | 5.10E-01 | 1.13 | 1.38 | Enterococcus_faecalis_98            | Bacteria_Firmicutes_Bacilli_Lactobacillales_Enterococcaceae_96_Enterococcus_76                                       |
| OTU_4748  | 9.87E-01 | 6.04E-01 | 1.43E-01 | 0.91 | 1.44 | Enterococcus_faecalis_93            | Bacteria_Firmicutes_83_Bacilli_83_Lactobacillales_81_Carnobacteriaceae_50_Catelicoccus_42                            |
| OTU_55027 | 9.34E-01 | 8.51E-01 | 4.07E-03 | 0.48 | 1.75 | Pseudoflavonifractor_capillosus_97  | Bacteria_Firmicutes_Clostridia_Clostridiales_Ruminococcaceae_Flavonifractor_50                                       |
| OTU_907   | 9.06E-01 | 9.94E-01 | 9.57E-02 | 0.63 | 0.15 | Breznakia_blatiicola_88             | Bacteria_Firmicutes_Clostridia_84_Clostridiales_84_Lachnospiraceae_84_Merdimonas_22                                  |
| OTU_2511  | 7.07E-01 | 9.35E-01 | 4.02E-04 | 1.50 | 0.19 | Bifidobacterium_catenulatum_97      | Bacteria_Actinobacteria_Actinobacteria_Bifidobacteriales_Bifidobacteriaceae_Bifidobacterium_99                       |
| OTU_2965  | 9.09E-01 | 6.04E-01 | 5.34E-01 | 1.83 | 1.38 | Acidaminococcus_fermentans_93       | Bacteria_Firmicutes_Negativicutes_91_Acidaminococcales_91_Acidaminococcaceae_91_Acidaminococcus_91                   |
| OTU_541   | 9.99E-01 | 6.47E-01 | 2.17E-01 | 0.62 | 0.27 | Streptococcus_thermophilus_100      | Bacteria_Firmicutes_88_Bacilli_82_Lactobacillales_80_Streptococcaceae_51_Streptococcus_47                            |
| OTU_760   | 8.47E-01 | 9.83E-01 | 3.84E-02 | 0.24 | 2.31 | Clostridium_combesii_99             | Bacteria_Firmicutes_Negativicutes_67_Acidaminococcales_67_Acidaminococcaceae_67_Phascolartobacterium_67              |
| OTU_9099  | 7.57E-01 | 8.18E-01 | 9.38E-06 | 3.33 | 0.05 | Parabacteroides_distasonis_94       | Bacteria_Bacteroidetes_Bacteroidia_Bacteroidales_Porphyromonadaceae_84_Parabacteroides_84                            |
| OTU_1978  | 7.45E-01 | 6.57E-01 | 8.80E-02 | 1.25 | 0.54 | Kineothrix_allysoides_94            | Bacteria_Firmicutes_Clostridia_Clostridiales_Lachnospiraceae_Clostridium_XIVa_56                                     |
| OTU_3905  | 9.87E-01 | 7.51E-01 | 1.68E-01 | 1.23 | 1.73 | Acetivibrio_ethanolognens_93        | Bacteria_Firmicutes_Clostridia_96_Clostridiales_96_Lachnospiraceae_96_Mediterraneibacter_8                           |



|           |          |          |          |      |      |                                    |                                                                                                                      |
|-----------|----------|----------|----------|------|------|------------------------------------|----------------------------------------------------------------------------------------------------------------------|
| OTU_4094  | 7.07E-01 | 7.01E-01 | 5.52E-01 | 1.63 | 1.32 | Pseudescherichia_vulneris_93       | Bacteria_Proteobacteria_Gammaproteobacteria_Enterobacterales_Enterobacteriaceae_99_Escherichia/Shigella_85           |
| OTU_4231  | 9.08E-01 | 8.83E-01 | 4.12E-01 | 1.98 | 1.54 | Hungatella_effluvi_100             | Bacteria_Firmicutes_92_Clostridia_92_Clostridiales_92_Lachnospiraceae_92_Hungatella_91                               |
| OTU_5331  | 8.74E-01 | 6.04E-01 | 4.10E-01 | 1.10 | 0.80 | Ruminococcus_torques_99            | Bacteria_Firmicutes_Clostridia_Clostridiales_Lachnospiraceae_Ruminococcus2_74                                        |
| OTU_625   | 7.07E-01 | 9.69E-01 | 1.00E+00 | 0.22 | 0.22 | Collinsella_aerofaciens_98         | Bacteria_Actinobacteria_85_Coriobacteriia_85_Coriobacteriales_85_Coriobacteriaceae_85_Collinsella_81                 |
| OTU_1129  | 7.46E-01 | 6.04E-01 | 5.06E-01 | 1.83 | 1.28 | Pseudescherichia_vulneris_97       | Bacteria_Proteobacteria_Gammaproteobacteria_Enterobacterales_Enterobacteriaceae_Escherichia/Shigella_82              |
| OTU_1881  | 9.04E-01 | 6.14E-01 | 4.39E-03 | 1.86 | 0.18 | Bifidobacterium_stercoris_97       | Bacteria_Actinobacteria_Actinobacteria_Bifidobacteriales_Bifidobacteriaceae_Bifidobacterium_90                       |
| OTU_3097  | 7.93E-01 | 6.04E-01 | 8.81E-01 | 1.27 | 1.20 | Lachnodostridium_pacaense_95       | Bacteria_Firmicutes_Clostridia_Clostridiales_Lachnospiraceae_Kineothrix_24                                           |
| OTU_3113  | 7.57E-01 | 6.04E-01 | 5.57E-01 | 1.70 | 1.22 | Collinsella_aerofaciens_98         | Bacteria_Actinobacteria_81_Coriobacteriia_81_Coriobacteriales_81_Coriobacteriaceae_78_Collinsella_75                 |
| OTU_330   | NA       | 6.04E-01 | 1.42E-01 | 0.00 | 0.92 | Pseudomonas_paralactis_100         | Bacteria_Proteobacteria_Gammaproteobacteria_Pseudomonadales_Pseudomonadaceae_Pseudomonas_100                         |
| OTU_45606 | 7.07E-01 | 9.18E-01 | 2.01E-03 | 2.44 | 0.42 | Streptococcus_mitis_97             | Bacteria_Firmicutes_Bacilli_Lactobacillales_Streptococcaceae_98_Streptococcus_97                                     |
| OTU_49224 | 7.07E-01 | 9.73E-01 | 7.98E-01 | 1.39 | 1.22 | Clostridium_symbiosum_95           | Bacteria_Firmicutes_Clostridia_Clostridiales_Lachnospiraceae_Clostridium_XIVa_33                                     |
| OTU_751   | 8.06E-01 | 6.04E-01 | 5.34E-02 | 2.16 | 0.36 | Clostridium_viride_97              | Bacteria_Firmicutes_Clostridia_Clostridiales_Ruminococcaceae_Intestinimonas_72                                       |
| OTU_1198  | 8.60E-01 | 7.32E-01 | 1.77E-01 | 2.14 | 1.36 | Roseburia_inulinivorans_96         | Bacteria_Firmicutes_Clostridia_Clostridiales_Lachnospiraceae_Roseburia_98                                            |
| OTU_1672  | 7.11E-01 | 6.43E-01 | 9.63E-01 | 0.44 | 0.42 | Haemophilus_parainfluenzae_95      | Bacteria_Proteobacteria_Gammaproteobacteria_Pasteurellales_79_Pasteurellaceae_79_Haemophilus_63                      |
| OTU_21725 | 7.82E-01 | 6.04E-01 | 6.39E-03 | 2.10 | 0.21 | Phocaeicola_vulgatus_95            | Bacteria_Bacteroidetes_Bacteroidia_Bacteroidales_Bacteroidaceae_Phocaeicola_99                                       |
| OTU_2777  | 7.84E-01 | 8.14E-01 | 9.79E-03 | 1.81 | 0.44 | Parabacteroides_merdae_97          | Bacteria_Bacteroidetes_Bacteroidia_Bacteroidales_Porphryomonadaceae_Parabacteroides_100                              |
| OTU_2834  | 7.74E-01 | 6.04E-01 | 7.13E-01 | 1.44 | 1.60 | Hungatella_effluvi_95              | Bacteria_Firmicutes_99_Clostridia_99_Clostridiales_99_Lachnospiraceae_99_Hungatella_99                               |
| OTU_29575 | 7.91E-01 | 6.04E-01 | 1.10E-01 | 0.99 | 1.61 | Enterococcus_faecalis_98           | Bacteria_Firmicutes_Bacilli_Lactobacillales_Enterococcaceae_95_Enterococcus_75                                       |
| OTU_618   | 7.07E-01 | 9.79E-01 | 5.01E-03 | 2.53 | 0.23 | Lactonifactor_longoviformis_100    | Bacteria_Firmicutes_Clostridia_Clostridiales_Lachnospiraceae_Lactonifactor_92                                        |
| OTU_64472 | 9.61E-01 | 9.41E-01 | 4.65E-03 | 1.65 | 0.38 | Bacteroides_faecis_95              | Bacteria_Bacteroidetes_Bacteroidia_Bacteroidales_Bacteroidaceae_Bacteroides_80                                       |
| OTU_1017  | 7.07E-01 | 6.04E-01 | 4.17E-02 | 0.68 | 2.47 | Phascolarctobacterium_faecium_98   | Bacteria_Firmicutes_Negativicutes_96_Acidaminococcales_96_Acidaminococcaceae_96_Phascolarctobacterium_95             |
| OTU_1165  | 9.83E-01 | 7.34E-01 | 3.49E-02 | 2.14 | 0.64 | Kineothrix_alysoides_94            | Bacteria_Firmicutes_Clostridia_Clostridiales_Lachnospiraceae_Clostridium_XIVa_68                                     |
| OTU_11759 | 8.25E-01 | 9.75E-01 | 3.86E-01 | 1.31 | 1.64 | Pseudescherichia_vulneris_98       | Bacteria_Proteobacteria_95_Gammaproteobacteria_95_Enterobacterales_94_Enterobacteriaceae_94_Pseudescherichia_74      |
| OTU_22967 | 7.07E-01 | 9.75E-01 | 2.21E-01 | 1.32 | 1.92 | Veillonella_dispar_96              | Bacteria_Firmicutes_Negativicutes_Veillonellales_Veillonellaceae_Veillonella_100                                     |
| OTU_27734 | 9.29E-01 | 6.66E-01 | 5.67E-02 | 2.36 | 0.84 | Clostridium_symbiosum_95           | Bacteria_Firmicutes_Clostridia_Clostridiales_Lachnospiraceae_Clostridium_XIVa_62                                     |
| OTU_63037 | 7.07E-01 | 6.04E-01 | 5.04E-01 | 1.01 | 1.28 | Enterococcus_faecalis_98           | Bacteria_Firmicutes_Bacilli_Lactobacillales_Enterococcaceae_98_Enterococcus_83                                       |
| OTU_11250 | 7.45E-01 | 9.91E-01 | 7.55E-02 | 0.83 | 1.80 | Mixta_theicola_88                  | Bacteria_Proteobacteria_57_Gammaproteobacteria_57_Enterobacterales_57_Enterobacteriaceae_57_Pseudescherichia_57      |
| OTU_1718  | 9.59E-01 | 6.04E-01 | 8.21E-01 | 1.77 | 1.59 | Acidaminococcus_fermentans_93      | Bacteria_Firmicutes_Negativicutes_Acidaminococcales_Acidaminococcaceae_Acidaminococcus_100                           |
| OTU_2033  | 7.75E-01 | 6.04E-01 | 3.93E-04 | 2.81 | 0.36 | Fusicatetibacter_saccharivorans_92 | Bacteria_Firmicutes_Clostridia_Clostridiales_Lachnospiraceae_38_Anaerotaenia_15                                      |
| OTU_3486  | 7.07E-01 | 6.50E-01 | 3.46E-03 | 2.00 | 0.39 | Enterococcus_dispar_98             | Bacteria_Firmicutes_96_Bacilli_95_Lactobacillales_86_Carnobacteriaceae_65_Isobaculum_54                              |
| OTU_79355 | 7.07E-01 | 9.90E-01 | 3.84E-02 | 3.39 | 0.23 | Bacteroides_stercoris_97           | Bacteria_Bacteroidetes_Bacteroidia_Bacteroidales_Bacteroidaceae_Bacteroides_100                                      |
| OTU_794   | 7.07E-01 | 6.04E-01 | 9.65E-02 | 0.77 | 2.03 | Erysipelatoclostridium_ramosum_91  | Bacteria_Firmicutes_Erysipelotrichia_99_Erysipelotrichales_99_Erysipelatoclostridiaceae_99_Erysipelatoclostridium_99 |
| OTU_808   | 8.05E-01 | 9.32E-01 | 6.85E-02 | 0.06 | 0.54 | Limosilactobacillus_mucosae_96     | Bacteria_Firmicutes_Bacilli_Lactobacillales_Lactobacillaceae_Limosilactobacillus_58                                  |
| OTU_97727 | 1.00E+00 | 9.74E-01 | 2.99E-03 | 0.29 | 3.03 | Veillonella_dispar_96              | Bacteria_Firmicutes_Negativicutes_Veillonellales_Veillonellaceae_Veillonella_100                                     |
| OTU_1022  | 7.10E-01 | 9.57E-01 | 3.27E-02 | 1.79 | 0.18 | Collinsella_aerofaciens_99         | Bacteria_Actinobacteria_98_Coriobacteriia_98_Coriobacteriales_98_Coriobacteriaceae_98_Collinsella_96                 |
| OTU_1197  | 7.07E-01 | 6.04E-01 | 7.64E-02 | 3.24 | 0.19 | Streptococcus_salivarius_90        | Bacteria_Firmicutes_99_Clostridia_86_Clostridiales_86_Lachnospiraceae_86_Roseburia_60                                |
| OTU_13151 | 7.14E-01 | 6.04E-01 | 2.67E-04 | 2.05 | 0.25 | Serratia_marcescens_91             | Bacteria_Proteobacteria_Gammaproteobacteria_Enterobacterales_Enterobacteriaceae_Pseudescherichia_89                  |
| OTU_1409  | 8.57E-01 | 9.62E-01 | 6.88E-02 | 0.77 | 2.25 | Paraclostridium_benzoelyticum_92   | Bacteria_Firmicutes_Clostridia_Clostridiales_Peptostreptococcaceae_56_Paraclostridium_54                             |
| OTU_245   | 9.99E-01 | 9.34E-01 | 9.82E-03 | 0.64 | 0.15 | Eubacterium_ruminantium_98         | Bacteria_Firmicutes_Clostridia_Clostridiales_Lachnospiraceae_Lachnospiraceae_incertae_sedis_85                       |
| OTU_2544  | 7.59E-01 | 6.04E-01 | 3.23E-02 | 3.26 | 0.12 | Clostridium_cadaveris_97           | Bacteria_Firmicutes_Clostridia_Clostridiales_Clostridiaceae_1_Clostridium_sensu_stricto_56                           |
| OTU_31022 | 7.81E-01 | 9.81E-01 | 5.16E-02 | 0.76 | 1.59 | Enterococcus_faecalis_98           | Bacteria_Firmicutes_Bacilli_Lactobacillales_95_Enterococcaceae_87_Enterococcus_78                                    |
| OTU_32971 | 7.07E-01 | 9.41E-01 | 2.47E-02 | 1.60 | 0.19 | Bifidobacterium_stercoris_98       | Bacteria_Actinobacteria_Actinobacteria_Bifidobacteriales_Bifidobacteriaceae_Bifidobacterium_99                       |
| OTU_3978  | 7.57E-01 | 6.06E-01 | 3.51E-02 | 2.22 | 0.73 | Pseudescherichia_vulneris_96       | Bacteria_Proteobacteria_93_Gammaproteobacteria_91_Enterobacterales_91_Enterobacteriaceae_91_Pseudescherichia_79      |
| OTU_441   | NA       | 8.79E-01 | 2.10E-01 | 0.00 | 2.83 | Azospira_restricta_99              | Bacteria_Proteobacteria_Betaproteobacteria_Rhodocyclales_Rhodocyclaceae_Azospira_99                                  |
| OTU_4713  | 7.57E-01 | 8.65E-01 | 1.21E-02 | 2.90 | 0.29 | Bacteroides_xylinisolvens_97       | Bacteria_Bacteroidetes_89_Bacteroidia_88_Bacteroidales_88_Bacteroidaceae_85_Mediterranea_63                          |
| OTU_52131 | 9.45E-01 | 8.68E-01 | 2.42E-04 | 0.67 | 2.05 | Veillonella_dispar_96              | Bacteria_Firmicutes_Negativicutes_99_Veillonellales_96_Veillonellaceae_96_Veillonella_95                             |
| OTU_629   | 7.46E-01 | 7.11E-01 | 1.00E-01 | 1.57 | 0.37 | Solobacterium_moorei_98            | Bacteria_Firmicutes_Erysipelotrichia_Erysipelotrichales_Erysipelotrichaceae_Solobacterium_100                        |
| OTU_11917 | 7.62E-01 | 8.65E-01 | 3.37E-01 | 1.11 | 1.40 | Clostridium_symbiosum_96           | Bacteria_Firmicutes_Clostridia_Clostridiales_Lachnospiraceae_Clostridium_XIVa_24                                     |
| OTU_295   | 9.92E-01 | 9.46E-01 | 7.85E-01 | 0.63 | 0.52 | Bacteroides_pectinophilus_100      | Bacteria_Firmicutes_Clostridia_Clostridiales_Lachnospiraceae_99_Clostridium_XIVa_64                                  |
| OTU_3032  | 8.97E-01 | 7.58E-01 | 8.94E-02 | 1.04 | 2.16 | Bariatricus_massiliensis_97        | Bacteria_Firmicutes_Clostridia_Clostridiales_Lachnospiraceae_Bariatricus_74                                          |
| OTU_4037  | 9.60E-01 | 6.63E-01 | 3.50E-01 | 1.10 | 1.62 | Paraclostridium_benzoelyticum_92   | Bacteria_Firmicutes_Clostridia_Clostridiales_Lachnospiraceae_58_Coproccoccus_23                                      |
| OTU_4316  | 7.81E-01 | 8.73E-01 | 6.66E-04 | 2.28 | 0.37 | Streptococcus_rubneri_89           | Bacteria_Firmicutes_Clostridia_89_Clostridiales_89_Lachnospiraceae_89_Enterocloster_79                               |
| OTU_479   | 7.11E-01 | 7.31E-01 | 1.43E-01 | 3.66 | 0.03 | Prevotella_copri_94                | Bacteria_Bacteroidetes_Bacteroidia_Bacteroidales_Prevotellaceae_Prevotella_100                                       |
| OTU_997   | 7.46E-01 | 9.62E-01 | 6.62E-01 | 1.69 | 1.22 | Succinivibrio_dextrinosolvans_94   | Bacteria_Proteobacteria_Gammaproteobacteria_Aeromonadales_Succinivibrionaceae_Succinivibrio_100                      |
| OTU_1147  | 7.07E-01 | 6.04E-01 | 8.72E-02 | 0.36 | 2.68 | Clostridium_combesii_95            | Bacteria_Firmicutes_Clostridia_Clostridiales_Peptostreptococcaceae_56_Peptacetobacter_29                             |
| OTU_14133 | 7.88E-01 | 9.82E-01 | 1.16E-05 | 2.67 | 0.31 | Bacteroides_ovatus_96              | Bacteria_Bacteroidetes_Bacteroidia_Bacteroidales_Bacteroidaceae_Bacteroides_94                                       |
| OTU_1440  | 8.97E-01 | 9.17E-01 | 1.68E-02 | 2.82 | 0.49 | Pseudescherichia_vulneris_93       | Bacteria_Proteobacteria_Gammaproteobacteria_95_Enterobacterales_95_Enterobacteriaceae_95_Pseudescherichia_94         |
| OTU_2166  | 9.05E-01 | 9.94E-01 | 6.83E-03 | 2.61 | 0.58 | Clostridium_symbiosum_95           | Bacteria_Firmicutes_Clostridia_Clostridiales_Lachnospiraceae_Clostridium_XIVa_59                                     |
| OTU_4372  | 9.45E-01 | 7.22E-01 | 8.57E-02 | 1.69 | 0.89 | Pseudescherichia_vulneris_97       | Bacteria_Proteobacteria_Gammaproteobacteria_Enterobacterales_Enterobacteriaceae_98_Pseudescherichia_84               |
| OTU_4832  | NA       | 6.50E-01 | 5.85E-02 | 0.00 | 2.26 | Methylobacterium_mobilis_93        | Bacteria_Proteobacteria_Gammaproteobacteria_54_Enterobacterales_52_Enterobacteriaceae_52_Pseudescherichia_45         |
| OTU_7639  | 7.46E-01 | 6.72E-01 | 3.19E-01 | 1.28 | 1.69 | Paraclostridium_benzoelyticum_96   | Bacteria_Firmicutes_Clostridia_Clostridiales_Peptostreptococcaceae_98_Paraclostridium_98                             |
| OTU_830   | 7.07E-01 | 6.04E-01 | 9.37E-02 | 0.41 | 1.96 | Enterococcus_faecalis_90           | Bacteria_Firmicutes_99_Clostridia_66_Clostridiales_66_Eubacteriaceae_64_Pseudoramibacter_46                          |
| OTU_1137  | 7.07E-01 | 8.46E-01 | 3.00E-01 | 1.51 | 0.97 | Blautia_coccoides_98               | Bacteria_Firmicutes_Clostridia_Clostridiales_Lachnospiraceae_Blautia_99                                              |
| OTU_1298  | 8.74E-01 | 8.59E-01 | 9.25E-01 | 1.79 | 1.88 | Bacteroides_timonensis_95          | Bacteria_Bacteroidetes_Bacteroidia_Bacteroidales_Bacteroidaceae_Bacteroides_100                                      |
| OTU_13968 | 9.67E-01 | 8.72E-01 | 2.09E-02 | 1.54 | 0.88 | Pseudescherichia_vulneris_91       | Bacteria_Proteobacteria_97_Gammaproteobacteria_97_Enterobacterales_96_Enterobacteriaceae_96_Pseudescherichia_96      |
| OTU_1745  | 9.99E-01 | 8.28E-01 | 1.38E-01 | 1.20 | 1.90 | Enterocloster_citroniae_100        | Bacteria_Firmicutes_Clostridia_Clostridiales_Lachnospiraceae_Enterocloster_100                                       |
| OTU_36277 | 8.06E-01 | 9.90E-01 | 3.15E-02 | 1.62 | 0.95 | Pseudescherichia_vulneris_96       | Bacteria_Proteobacteria_Gammaproteobacteria_Enterobacterales_Enterobacteriaceae_Escherichia/Shigella_91              |

|           |          |          |          |      |      |                                    |                                                                                                                      |
|-----------|----------|----------|----------|------|------|------------------------------------|----------------------------------------------------------------------------------------------------------------------|
| OTU_3922  | 9.08E-01 | 6.39E-01 | 7.65E-02 | 0.66 | 1.62 | Eubacterium_callanderi_92          | Bacteria_Firmicutes_87_Clostridia_87_Clostridiales_87_Eubacteriaceae_87_Pseudoramibacter_86                          |
| OTU_4668  | 7.07E-01 | 6.04E-01 | 7.84E-01 | 1.68 | 1.35 | Kluyvera_cryocrescens_99           | Bacteria_Proteobacteria_Gammaproteobacteria_Enterobacterales_Enterobacteriaceae_99_Kluyvera_65                       |
| OTU_580   | 9.99E-01 | NA       | 3.11E-02 | 2.61 | 0.00 | Duncaniella_freteri_87             | Bacteria_Bacteroidetes_Bacteroidia_Bacteroidales_Muribaculaceae_96_Muribaculum_94                                    |
| OTU_6138  | 7.22E-01 | 8.36E-01 | 3.39E-01 | 1.29 | 1.79 | Bacteroides_thetaiotaomicron_99    | Bacteria_Bacteroidetes_87_Bacteroidia_87_Bacteroidales_87_Bacteroidaceae_86_Mediterranea_67                          |
| OTU_7124  | 9.38E-01 | 8.65E-01 | 8.86E-01 | 1.41 | 1.48 | Pseudescherichia_vulneris_94       | Bacteria_Proteobacteria_Gammaproteobacteria_Enterobacterales_Enterobacteriaceae_99_Pseudescherichia_68               |
| OTU_7586  | 7.07E-01 | 6.04E-01 | 2.05E-02 | 1.00 | 1.93 | Enterococcus_dispar_96             | Bacteria_Firmicutes_46_Bacilli_46_Lactobacillales_43_Carnobacteriaceae_36_Isobaculum_29                              |
| OTU_9840  | 9.35E-01 | 6.06E-01 | 1.75E-02 | 2.63 | 0.66 | Clostridium_perfringens_93         | Bacteria_Firmicutes_Clostridia_Clostridiales_Lachnospiraceae_78_Clostridium_XIVa_32                                  |
| OTU_10571 | 7.59E-01 | 6.66E-01 | 1.04E-02 | 1.84 | 0.68 | Veillonella_atypica_95             | Bacteria_Firmicutes_Negativicutes_Veillonellales_Veillonellaceae_Veillonella_100                                     |
| OTU_13489 | 9.14E-01 | 5.62E-01 | 1.65E-01 | 1.07 | 0.65 | Collinsella_aerofaciens_94         | Bacteria_Actinobacteria_98_Coriobacteriia_98_Coriobacteriales_98_Coriobacteriaceae_98_Collinsella_97                 |
| OTU_1433  | 1.00E+00 | 9.89E-01 | 7.43E-02 | 2.02 | 0.92 | Kineothrix_alysoides_94            | Bacteria_Firmicutes_Clostridia_Clostridiales_Lachnospiraceae_Clostridium_XIVa_58                                     |
| OTU_3125  | 9.57E-01 | 6.06E-01 | 3.33E-01 | 1.10 | 1.74 | Acidaminococcus_fermentans_95      | Bacteria_Firmicutes_Negativicutes_Acidaminococcales_Acidaminococcaceae_Acidaminococcus_100                           |
| OTU_63523 | 8.57E-01 | 9.24E-01 | 2.47E-02 | 0.70 | 1.48 | Enterococcus_faecalis_97           | Bacteria_Firmicutes_Bacilli_Lactobacillales_Enterococcaceae_87_Enterococcus_65                                       |
| OTU_7431  | 1.00E+00 | 7.31E-01 | 7.89E-01 | 1.50 | 1.63 | Faecalimonas_umblicata_96          | Bacteria_Firmicutes_Clostridia_Clostridiales_Lachnospiraceae_Coprococcus_66                                          |
| OTU_8346  | 7.07E-01 | 9.46E-01 | 1.10E-01 | 0.99 | 2.02 | Pseudescherichia_vulneris_92       | Bacteria_Proteobacteria_97_Gammaproteobacteria_97_Enterobacterales_97_Enterobacteriaceae_97_Pseudescherichia_89      |
| OTU_8913  | 9.04E-01 | 9.25E-01 | 8.33E-01 | 1.45 | 1.36 | Bacteroides_thetaiotaomicron_99    | Bacteria_Bacteroidetes_95_Bacteroidia_95_Bacteroidales_95_Bacteroidaceae_95_Bacteroides_95                           |
| OTU_12840 | 9.14E-01 | 8.18E-01 | 1.92E-02 | 1.84 | 0.84 | Enterocloster_clostridioformis_96  | Bacteria_Firmicutes_Clostridia_Clostridiales_Lachnospiraceae_Coprococcus_49                                          |
| OTU_1958  | 9.62E-01 | 6.72E-01 | 9.27E-03 | 0.41 | 2.49 | Clostridium_cocleatum_90           | Bacteria_Firmicutes_Erysipelotrichia_86_Erysipelotrichales_86_Erysipelatoclostridiaceae_84_Erysipelatoclostridium_84 |
| OTU_2134  | 9.38E-01 | 9.66E-01 | 1.12E-02 | 0.21 | 1.05 | Phocaeicola_coprophilus_88         | Bacteria_Proteobacteria_48_Gammaproteobacteria_48_Enterobacterales_48_Enterobacteriaceae_48_Pseudescherichia_48      |
| OTU_2189  | 9.06E-01 | 9.88E-01 | 7.99E-03 | 2.32 | 0.21 | Pseudescherichia_vulneris_99       | Bacteria_Proteobacteria_83_Gammaproteobacteria_83_Enterobacterales_83_Enterobacteriaceae_83_Pseudescherichia_80      |
| OTU_33599 | 7.07E-01 | 6.76E-01 | 2.35E-01 | 1.08 | 1.60 | Enterococcus_faecalis_98           | Bacteria_Firmicutes_Bacilli_Lactobacillales_Enterococcaceae_94_Enterococcus_88                                       |
| OTU_3624  | 7.07E-01 | 6.04E-01 | 1.74E-02 | 2.12 | 0.99 | Eisenbergiella_tayi_95             | Bacteria_Firmicutes_Clostridia_Clostridiales_Lachnospiraceae_95_Eisenbergiella_94                                    |
| OTU_64910 | 8.53E-01 | 7.02E-01 | 2.49E-01 | 0.98 | 1.37 | Pseudescherichia_vulneris_96       | Bacteria_Proteobacteria_Gammaproteobacteria_Enterobacterales_Enterobacteriaceae_Escherichia/Shigella_89              |
| OTU_8069  | 7.07E-01 | 8.51E-01 | 7.19E-02 | 1.76 | 0.84 | Veillonella_atypica_96             | Bacteria_Firmicutes_Negativicutes_99_Veillonellales_98_Veillonellaceae_98_Veillonella_98                             |
| OTU_1074  | 9.73E-01 | 6.04E-01 | 2.63E-02 | 0.39 | 1.23 | Escherichia_coli_88                | Bacteria_Proteobacteria_78_Gammaproteobacteria_78_Enterobacterales_78_Enterobacteriaceae_78_Pseudescherichia_78      |
| OTU_17520 | 7.07E-01 | 6.65E-01 | 1.42E-01 | 0.48 | 1.14 | Phocaeicola_coprophilus_94         | Bacteria_Bacteroidetes_Bacteroidia_Bacteroidales_Bacteroidaceae_Bacteroides_48                                       |
| OTU_1870  | 7.91E-01 | 7.40E-01 | 4.03E-03 | 3.12 | 0.17 | Clostridium_perfringens_96         | Bacteria_Firmicutes_88_Clostridia_88_Clostridiales_88_Clostridiaceae_1_87_Anaerobacter_26                            |
| OTU_23253 | 8.20E-01 | 8.08E-01 | 1.13E-01 | 1.13 | 1.86 | Veillonella_dispar_100             | Bacteria_Firmicutes_81_Negativicutes_81_Veillonellales_57_Veillonellaceae_57_Veillonella_54                          |
| OTU_51095 | 7.85E-01 | 6.39E-01 | 8.36E-03 | 2.20 | 0.21 | Streptococcus_mitis_98             | Bacteria_Firmicutes_Bacilli_Lactobacillales_Streptococcaceae_Streptococcus_100                                       |
| OTU_80179 | 9.32E-01 | 9.25E-01 | 6.14E-01 | 1.21 | 1.42 | Pseudescherichia_vulneris_95       | Bacteria_Proteobacteria_Gammaproteobacteria_Enterobacterales_Enterobacteriaceae_Pseudescherichia_76                  |
| OTU_9355  | 7.07E-01 | 8.50E-01 | 9.99E-03 | 2.03 | 0.31 | Bacteroides_kribbi_94              | Bacteria_Bacteroidetes_Bacteroidia_Bacteroidales_Bacteroidaceae_Bacteroides_52                                       |
| OTU_1886  | 9.98E-01 | 6.04E-01 | 5.32E-03 | 2.25 | 0.37 | Enterococcus_hirae_94              | Bacteria_Firmicutes_Bacilli_93_Lactobacillales_93_Enterococcaceae_65_Melissococcus_38                                |
| OTU_2297  | 7.07E-01 | 8.68E-01 | 7.32E-01 | 0.92 | 0.78 | Pseudescherichia_vulneris_97       | Bacteria_Proteobacteria_Gammaproteobacteria_Enterobacterales_Enterobacteriaceae_Escherichia/Shigella_80              |
| OTU_3285  | 7.07E-01 | 9.84E-01 | 3.49E-02 | 1.95 | 0.63 | Veillonella_atypica_96             | Bacteria_Firmicutes_Negativicutes_95_Veillonellales_94_Veillonellaceae_94_Veillonella_94                             |
| OTU_3408  | 1.00E+00 | 7.88E-01 | 2.32E-02 | 1.44 | 0.21 | Bacteroides_uniformis_96           | Bacteria_Bacteroidetes_Bacteroidia_Bacteroidales_Bacteroidaceae_99_Bacteroides_98                                    |
| OTU_3726  | 9.64E-01 | 7.40E-01 | 3.43E-01 | 1.58 | 1.09 | Enterococcus_hirae_92              | Bacteria_Firmicutes_Bacilli_68_Lactobacillales_67_Carnobacteriaceae_34_Catellibaculum_15                             |
| OTU_3827  | 9.46E-01 | 9.83E-01 | 4.84E-02 | 0.94 | 1.65 | Enterococcus_hirae_95              | Bacteria_Firmicutes_Bacilli_83_Lactobacillales_83_Enterococcaceae_61_Vagococcus_40                                   |
| OTU_4487  | 9.37E-01 | 6.66E-01 | 5.30E-01 | 1.26 | 1.62 | Escherichia_coli_91                | Bacteria_Proteobacteria_91_Gammaproteobacteria_91_Enterobacterales_91_Enterobacteriaceae_90_Pseudescherichia_89      |
| OTU_523   | 7.46E-01 | NA       | 2.54E-02 | 2.90 | 0.00 | Desulfovibrio_desulfuricans_89     | Bacteria_Proteobacteria_Deltaproteobacteria_99_Desulfovibrionales_99_Desulfovibrionaceae_99_Mailhella_77             |
| OTU_542   | 7.07E-01 | 6.04E-01 | 3.17E-01 | 0.43 | 0.09 | Bifidobacterium_apri_99            | Bacteria_Actinobacteria_94_Actinobacteria_94_Bifidobacteriales_94_Bifidobacteriaceae_94_Neoscardovia_38              |
| OTU_10443 | 9.87E-01 | 7.42E-01 | 2.08E-02 | 1.92 | 0.63 | Bacteroides_stercorisoris_97       | Bacteria_Bacteroidetes_Bacteroidia_Bacteroidales_Bacteroidaceae_Bacteroides_100                                      |
| OTU_11241 | 8.43E-01 | 6.57E-01 | 3.49E-02 | 2.26 | 0.64 | Sutterella_massiliensis_97         | Bacteria_Proteobacteria_Betaproteobacteria_Burkholderiales_Sutterellaceae_Sutterella_100                             |
| OTU_1501  | 8.57E-01 | 8.65E-01 | 8.20E-03 | 1.57 | 0.40 | Enterococcus_dispar_98             | Bacteria_Firmicutes_61_Bacilli_61_Lactobacillales_61_Carnobacteriaceae_58_Isobaculum_33                              |
| OTU_1818  | 7.94E-01 | 7.11E-01 | 6.22E-01 | 0.96 | 1.19 | Pseudescherichia_vulneris_88       | Bacteria_Firmicutes_85_Clostridia_85_Clostridiales_85_Lachnospiraceae_85_Dorea_69                                    |
| OTU_2219  | 7.07E-01 | 6.04E-01 | 4.84E-02 | 1.37 | 0.48 | Veillonella_tobetsuensis_97        | Bacteria_Firmicutes_Negativicutes_Veillonellales_Veillonellaceae_Veillonella_100                                     |
| OTU_320   | NA       | 6.06E-01 | 1.54E-01 | 0.00 | 2.43 | Kofleria_flava_92                  | Bacteria_Proteobacteria_Deltaproteobacteria_Myxococcales_99_Nannocystineae_98_Kofleriaceae_83_Kofleria_83            |
| OTU_3839  | 9.22E-01 | 9.25E-01 | 4.34E-02 | 0.51 | 2.71 | Bacteroides_fragilis_88            | Bacteria_Firmicutes_53_Clostridia_53_Clostridiales_53_Lachnospiraceae_53_Lactonifactor_15                            |
| OTU_5098  | 8.54E-01 | 8.14E-01 | 1.07E-01 | 0.90 | 1.35 | Enterocloster_citroniae_97         | Bacteria_Firmicutes_Clostridia_Clostridiales_Lachnospiraceae_Enterocloster_96                                        |
| OTU_10192 | 8.51E-01 | 9.35E-01 | 4.03E-03 | 2.22 | 0.42 | Bacteroides_fragilis_98            | Bacteria_Bacteroidetes_56_Bacteroidia_56_Bacteroidales_56_Bacteroidaceae_55_Mediterranea_44                          |
| OTU_1118  | 7.73E-01 | 7.36E-01 | 1.91E-02 | 2.76 | 0.64 | Bacteroides_faecichinchillae_96    | Bacteria_Bacteroidetes_Bacteroidia_Bacteroidales_Bacteroidaceae_96_Bacteroides_96                                    |
| OTU_1896  | 9.65E-01 | 9.52E-01 | 4.12E-04 | 2.17 | 0.56 | Clostridium_tarantellae_91         | Bacteria_Firmicutes_99_Clostridia_99_Clostridiales_99_Lachnospiraceae_69_Anaerotaenia_24                             |
| OTU_2044  | 7.07E-01 | 8.18E-01 | 1.36E-01 | 2.38 | 0.82 | Roseburia_inulinivorans_94         | Bacteria_Firmicutes_Clostridia_Clostridiales_Lachnospiraceae_Roseburia_66                                            |
| OTU_235   | 8.29E-01 | 6.04E-01 | 3.33E-01 | 1.01 | 0.38 | Olsenella_profusa_95               | Bacteria_Actinobacteria_Coriobacteriia_Coriobacteriales_99_Atopobiaceae_98_Olsenella_98                              |
| OTU_2952  | 8.60E-01 | 6.63E-01 | 6.69E-01 | 1.52 | 1.34 | Pseudescherichia_vulneris_94       | Bacteria_Proteobacteria_95_Gammaproteobacteria_95_Enterobacterales_95_Enterobacteriaceae_95_Pseudescherichia_76      |
| OTU_3675  | 8.06E-01 | 8.28E-01 | 3.06E-01 | 1.33 | 1.95 | Enterococcus_hirae_93              | Bacteria_Firmicutes_99_Bacilli_86_Lactobacillales_86_Enterococcaceae_52_Melissococcus_32                             |
| OTU_714   | 7.07E-01 | 6.04E-01 | 4.59E-01 | 1.37 | 0.58 | Dialister_propionificaciens_95     | Bacteria_Firmicutes_71_Negativicutes_71_Veillonellales_71_Veillonellaceae_71_Dialister_65                            |
| OTU_10671 | 9.97E-01 | 6.04E-01 | 2.83E-02 | 2.01 | 0.42 | Tyzzerella_nexilis_98              | Bacteria_Firmicutes_Clostridia_Clostridiales_Lachnospiraceae_Tyzzerella_49                                           |
| OTU_1169  | 7.12E-01 | 6.04E-01 | 1.80E-02 | 2.68 | 0.43 | Dialister_pneumosintes_99          | Bacteria_Firmicutes_Negativicutes_84_Veillonellales_84_Veillonellaceae_84_Dialister_79                               |
| OTU_12576 | 9.10E-01 | 9.46E-01 | 9.96E-02 | 0.82 | 1.32 | Desemzia_incerta_88                | Bacteria_Firmicutes_Negativicutes_70_Selenomonadales_41_Sporomusaceae_41_Anaerobacter_43                             |
| OTU_2284  | 8.85E-01 | 6.66E-01 | 1.11E-01 | 0.91 | 1.74 | Pseudoflavonifractor_capillosus_97 | Bacteria_Firmicutes_Clostridia_Clostridiales_Ruminococcaceae_Flavonifractor_47                                       |
| OTU_61498 | 9.67E-01 | 6.04E-01 | 6.97E-02 | 0.25 | 2.30 | Erysipelatoclostridium_amosum_92   | Bacteria_Firmicutes_Erysipelotrichia_Erysipelotrichales_Erysipelatoclostridiaceae_99_Erysipelatoclostridium_99       |
| OTU_66014 | 7.10E-01 | 9.77E-01 | 7.32E-02 | 0.91 | 1.52 | Enterocloster_clostridioformis_96  | Bacteria_Firmicutes_Clostridia_Clostridiales_Lachnospiraceae_Enterocloster_92                                        |
| OTU_817   | 8.87E-01 | 6.55E-01 | 1.19E-02 | 2.76 | 0.14 | Clostridium_carnis_89              | Bacteria_Firmicutes_63_Clostridia_62_Clostridiales_62_Clostridiaceae_1_55_Anaerobacter_43                            |
| OTU_936   | 9.31E-01 | 8.17E-01 | 2.63E-02 | 2.06 | 0.73 | Peptoniphilus_tyrrelliae_94        | Bacteria_Firmicutes_99_Clostridia_99_Clostridiales_99_Peptoniphilaceae_99_Peptoniphilus_99                           |
| OTU_11657 | 7.07E-01 | 8.50E-01 | 2.18E-01 | 0.87 | 1.60 | Bacteroides_fragilis_97            | Bacteria_Bacteroidetes_Bacteroidia_Bacteroidales_Bacteroidaceae_Bacteroides_100                                      |
| OTU_14320 | 1.00E+00 | 9.52E-01 | 7.35E-01 | 1.14 | 1.30 | Escherichia_albertii_87            | Bacteria_Proteobacteria_48_Gammaproteobacteria_48_Enterobacterales_48_Enterobacteriaceae_48_Pseudescherichia_48      |
| OTU_1534  | 8.25E-01 | 7.34E-01 | 2.03E-02 | 0.68 | 1.53 | Bacteroides_intestinalis_88        | Bacteria_Firmicutes_98_Clostridia_98_Clostridiales_98_Ruminococcaceae_98_Flavonifractor_91                           |
| OTU_2109  | 7.57E-01 | 6.04E-01 | 3.77E-02 | 0.67 | 2.38 | Bacteroides_acidifaciens_89        | Bacteria_Bacteroidetes_61_Bacteroidia_61_Bacteroidales_61_Bacteroidaceae_60_Bacteroides_56                           |



|           |          |          |          |      |      |                                    |                                                                                                                      |
|-----------|----------|----------|----------|------|------|------------------------------------|----------------------------------------------------------------------------------------------------------------------|
| OTU_31807 | 7.16E-01 | 7.96E-01 | 3.27E-03 | 0.71 | 2.34 | Bacteroides_thetaiotaomicron_98    | Bacteria_Bacteroidetes_Bacteroidia_Bacteroidales_Bacteroidaceae_Bacteroides_100                                      |
| OTU_4027  | 9.31E-01 | 7.70E-01 | 9.52E-03 | 2.16 | 0.66 | Pseudescherichia_vulneris_97       | Bacteria_Proteobacteria_94_Gammaproteobacteria_94_Enterobacterales_94_Enterobacteriaceae_94_Pseudescherichia_83      |
| OTU_422   | 8.20E-01 | NA       | 6.43E-02 | 3.86 | 0.00 | Natranaerovirga_pectinivora_90     | Bacteria_Firmicutes_98_Clostridia_98_Clostridiales_98_Ruminococcaceae_44_Ercella_15                                  |
| OTU_4464  | 7.07E-01 | 6.04E-01 | 7.30E-01 | 1.17 | 1.42 | Klebsiella_pneumoniae_98           | Bacteria_Proteobacteria_Gammaproteobacteria_Enterobacterales_Erwiniaecae_36_Erwinia_35                               |
| OTU_4705  | 7.07E-01 | 9.18E-01 | 1.99E-02 | 1.85 | 0.51 | Bacteroides_xylanisolvans_97       | Bacteria_Bacteroidetes_Bacteroidia_Bacteroidales_Bacteroidaceae_Bacteroides_100                                      |
| OTU_4958  | 7.10E-01 | 8.34E-01 | 4.70E-03 | 0.63 | 2.23 | Bacteroides_faecis_91              | Bacteria_Bacteroidetes_91_Bacteroidia_91_Bacteroidales_91_Bacteroidaceae_91_Bacteroides_38                           |
| OTU_750   | 8.94E-01 | 6.04E-01 | 1.33E-01 | 1.36 | 0.15 | Clostridium_populeti_95            | Bacteria_Firmicutes_Clostridia_Clostridiales_Lachnospiraceae_Ruminococcus2_35                                        |
| OTU_7563  | 8.12E-01 | 6.04E-01 | 5.75E-01 | 1.69 | 1.31 | Veillonella_criceti_89             | Bacteria_Firmicutes_Clostridia_93_Clostridiales_93_Peptostreptococcaceae_93_Paraclostridium_88                       |
| OTU_1149  | 7.16E-01 | 6.04E-01 | 9.49E-02 | 0.38 | 2.31 | Paraclostridium_benzoelyticum_96   | Bacteria_Firmicutes_Clostridia_Clostridiales_Peptostreptococcaceae_Paraclostridium_100                               |
| OTU_1427  | 7.68E-01 | 6.04E-01 | 8.58E-01 | 1.30 | 1.15 | Mixta_theicola_96                  | Bacteria_Proteobacteria_Gammaproteobacteria_Enterobacterales_Enterobacteriaceae_93_Atlantibacter_15                  |
| OTU_14402 | 7.86E-01 | 7.32E-01 | 4.45E-02 | 0.62 | 2.33 | Bacteroides_thetaiotaomicron_97    | Bacteria_Bacteroidetes_Bacteroidia_Bacteroidales_Bacteroidaceae_Bacteroides_99                                       |
| OTU_24730 | 7.07E-01 | 8.51E-01 | 1.30E-01 | 0.89 | 1.42 | Enterococcus_faecalis_98           | Bacteria_Firmicutes_Bacilli_Lactobacillales_Enterococcaceae_97_Enterococcus_77                                       |
| OTU_3079  | 7.07E-01 | 7.66E-01 | 1.71E-02 | 1.60 | 0.55 | Coprococcus_comes_91               | Bacteria_Firmicutes_Clostridia_Clostridiales_Lachnospiraceae_Bariatricus_77                                          |
| OTU_5409  | 7.46E-01 | 9.82E-01 | 1.48E-01 | 0.91 | 1.59 | Veillonella_dispar_97              | Bacteria_Firmicutes_Negativicutes_Veillonellales_98_Veillonellaceae_98_Veillonella_98                                |
| OTU_6337  | 7.07E-01 | 7.02E-01 | 1.72E-01 | 1.81 | 0.46 | Pseudoflavonifractor_phocaensis_97 | Bacteria_Firmicutes_Clostridia_Clostridiales_Ruminococcaceae_Intestinimonas_68                                       |
| OTU_864   | NA       | 8.36E-01 | 1.03E-02 | 0.00 | 2.13 | Piscinibacter_aquaticus_100        | Bacteria_Proteobacteria_Betaproteobacteria_Burkholderiales_Comamonadaceae_Piscinibacter_100                          |
| OTU_1176  | 7.07E-01 | 8.14E-01 | 5.38E-01 | 0.94 | 1.15 | Flavonifractor_plautii_97          | Bacteria_Firmicutes_Clostridia_Clostridiales_Ruminococcaceae_Flavonifractor_100                                      |
| OTU_1792  | 7.07E-01 | 6.04E-01 | 1.14E-01 | 1.58 | 0.73 | Enterococcus_faecalis_96           | Bacteria_Firmicutes_Bacilli_Lactobacillales_99_Enterococcaceae_75_Enterococcus_59                                    |
| OTU_2132  | 7.85E-01 | 9.32E-01 | 4.20E-01 | 1.23 | 0.97 | Enterocloster_clostridioformis_91  | Bacteria_Firmicutes_98_Clostridia_98_Clostridiales_98_Lachnospiraceae_94_Enterocloster_44                            |
| OTU_2974  | 8.97E-01 | 6.04E-01 | 9.35E-01 | 1.51 | 1.45 | Ruminococcus_gnavus_97             | Bacteria_Firmicutes_Clostridia_Clostridiales_Lachnospiraceae_Lachnospiraceae_incertae_sedis_81                       |
| OTU_1015  | 7.07E-01 | 6.05E-01 | 2.51E-01 | 1.46 | 0.52 | Fusobacterium_mortiferum_95        | Bacteria_Fusobacteria_99_Fusobacteriia_99_Fusobacteriales_99_Fusobacteriaceae_92_Cetobacterium_57                    |
| OTU_13473 | 7.07E-01 | 8.49E-01 | 1.32E-01 | 0.93 | 1.51 | Bacteroides_thetaiotaomicron_97    | Bacteria_Bacteroidetes_79_Bacteroidia_79_Bacteroidales_79_Bacteroidaceae_78_Mediterranea_64                          |
| OTU_16574 | 7.07E-01 | 6.04E-01 | 1.42E-01 | 1.27 | 0.59 | Collinsella_aerofaciens_96         | Bacteria_Actinobacteria_Coriobacteriia_Coriobacteriales_Coriobacteriaceae_Collinsella_100                            |
| OTU_1917  | 9.65E-01 | 7.84E-01 | 4.44E-01 | 1.27 | 1.61 | Roseburia_inulinivorans_94         | Bacteria_Firmicutes_95_Clostridia_95_Clostridiales_95_Lachnospiraceae_95_Roseburia_67                                |
| OTU_2244  | 8.75E-01 | 8.72E-01 | 5.91E-02 | 1.57 | 0.80 | Clostridium_perfringens_90         | Bacteria_Firmicutes_Bacilli_79_Lactobacillales_62_Carnobacteriaceae_57_Isobaculum_48                                 |
| OTU_311   | NA       | 9.70E-01 | 1.24E-01 | 0.00 | 1.09 | Aquisediminimonas_profunda_100     | Bacteria_Proteobacteria_Alphaproteobacteria_Sphingomonadales_Sphingomonadaceae_Aquisediminimonas_92                  |
| OTU_32765 | 8.57E-01 | 8.45E-01 | 1.46E-02 | 0.48 | 2.00 | Lachnoclostridium_pacaense_93      | Bacteria_Firmicutes_Clostridia_Clostridiales_Lachnospiraceae_Clostridium_XIVa_42                                     |
| OTU_7305  | 8.25E-01 | 6.14E-01 | 8.36E-02 | 0.90 | 1.76 | Vagococcus_carniphilus_92          | Bacteria_Firmicutes_Erysipelotrichia_73_Erysipelotrichales_73_Erysipelatoclostridiaceae_73_Erysipelatoclostridium_73 |
| OTU_811   | 8.25E-01 | 6.73E-01 | 1.79E-03 | 0.11 | 1.04 | Fusicatenibacter_saccharivorans_91 | Bacteria_Firmicutes_Clostridia_Clostridiales_Lachnospiraceae_98_Fusicatenibacter_14                                  |
| OTU_9247  | 9.38E-01 | 6.62E-01 | 6.69E-02 | 0.87 | 0.31 | Faecalicatena_erotica_95           | Bacteria_Firmicutes_Clostridia_Clostridiales_Lachnospiraceae_Clostridium_XIVa_76                                     |
| OTU_1046  | 7.91E-01 | 8.68E-01 | 1.47E-01 | 2.90 | 0.07 | Bacteroides_stercoris_100          | Bacteria_Bacteroidetes_Bacteroidia_Bacteroidales_Bacteroidaceae_98_Mediterranea_78                                   |
| OTU_2002  | 8.89E-01 | 9.54E-01 | 3.51E-01 | 0.69 | 0.45 | Faecalibacterium_prausnitzii_94    | Bacteria_Firmicutes_Clostridia_Clostridiales_Ruminococcaceae_Faecalibacterium_98                                     |
| OTU_2211  | 8.57E-01 | 9.18E-01 | 9.65E-01 | 0.22 | 0.23 | Eubacterium_ramulus_95             | Bacteria_Firmicutes_Clostridia_Clostridiales_Lachnospiraceae_Lachnospiraceae_incertae_sedis_47                       |
| OTU_2240  | 8.49E-01 | 8.72E-01 | 5.06E-03 | 0.36 | 2.10 | Gibbsiella_dentsursi_86            | Bacteria_Proteobacteria_59_Gammaproteobacteria_59_Enterobacterales_59_Enterobacteriaceae_59_Pseudescherichia_59      |
| OTU_4774  | 7.07E-01 | 6.04E-01 | 9.57E-02 | 1.35 | 0.50 | Pseudescherichia_vulneris_97       | Bacteria_Proteobacteria_Gammaproteobacteria_Enterobacterales_Enterobacteriaceae_Escherichia/Shigella_73              |
| OTU_482   | 7.46E-01 | 6.04E-01 | 2.33E-01 | 0.20 | 0.05 | Fusobacterium_mortiferum_95        | Bacteria_Fusobacteria_87_Fusobacteriia_87_Fusobacteriales_87_Fusobacteriaceae_82_Cetobacterium_47                    |
| OTU_1228  | 7.07E-01 | 9.46E-01 | 6.80E-02 | 0.05 | 1.72 | Kluyvera_georgiana_92              | Bacteria_Proteobacteria_Gammaproteobacteria_86_Enterobacterales_86_Enterobacteriaceae_86_Pseudescherichia_64         |
| OTU_1374  | 7.12E-01 | 9.84E-01 | 4.94E-04 | 1.98 | 0.30 | Enterocloster_citroniae_95         | Bacteria_Firmicutes_Clostridia_Clostridiales_Lachnospiraceae_99_Enterocloster_64                                     |
| OTU_1490  | 7.11E-01 | 9.41E-01 | 2.84E-03 | 2.37 | 0.36 | Streptococcus_rubneri_90           | Bacteria_Firmicutes_Clostridia_81_Clostridiales_81_Lachnospiraceae_81_Clostridium_XIVa_36                            |
| OTU_16892 | 8.06E-01 | 6.04E-01 | 7.71E-01 | 1.35 | 1.05 | Bifidobacterium_breve_89           | Bacteria_Actinobacteria_91_Actinobacteria_91_Bifidobacteriales_91_Bifidobacteriaceae_91_Neoscardovia_45              |
| OTU_16955 | 9.31E-01 | 9.35E-01 | 5.80E-02 | 0.87 | 1.48 | Pseudescherichia_vulneris_91       | Bacteria_Proteobacteria_85_Gammaproteobacteria_85_Enterobacterales_85_Enterobacteriaceae_83_Pseudescherichia_83      |
| OTU_2253  | 9.93E-01 | 7.24E-01 | 1.80E-02 | 0.64 | 1.39 | Flavonifractor_plautii_97          | Bacteria_Firmicutes_Clostridia_Clostridiales_Ruminococcaceae_Flavonifractor_100                                      |
| OTU_8534  | 7.59E-01 | 7.34E-01 | 3.88E-02 | 0.33 | 1.33 | Enterococcus_faecalis_91           | Bacteria_Firmicutes_Negativicutes_90_Acidaminococcales_90_Acidaminococcaceae_90_Phascolartcobacterium_84             |
| OTU_10218 | 7.97E-01 | 6.04E-01 | 1.98E-02 | 1.97 | 0.84 | Bacteroides_xylanisolvans_98       | Bacteria_Bacteroidetes_91_Bacteroidia_91_Bacteroidales_91_Bacteroidaceae_90_Bacteroides_61                           |
| OTU_11123 | 7.07E-01 | 6.73E-01 | 1.46E-02 | 1.94 | 0.34 | Bacteroides_uniformis_99           | Bacteria_Bacteroidetes_Bacteroidia_Bacteroidales_Bacteroidaceae_95_Mediterranea_70                                   |
| OTU_1119  | 7.68E-01 | 9.25E-01 | 3.65E-01 | 1.70 | 1.16 | Pseudescherichia_vulneris_96       | Bacteria_Proteobacteria_Gammaproteobacteria_Enterobacterales_93_Enterobacteriaceae_93_Escherichia/Shigella_69        |
| OTU_18697 | 7.12E-01 | 8.50E-01 | 3.00E-02 | 1.21 | 0.10 | Phocaeicola_vulgatus_97            | Bacteria_Bacteroidetes_Bacteroidia_Bacteroidales_Bacteroidaceae_Phocaeicola_65                                       |
| OTU_18863 | 9.38E-01 | 9.25E-01 | 1.21E-01 | 1.73 | 0.87 | Kineothrix_allysoides_94           | Bacteria_Firmicutes_Clostridia_Clostridiales_Lachnospiraceae_Clostridium_XIVa_41                                     |
| OTU_2830  | 7.93E-01 | 6.04E-01 | 2.84E-04 | 0.50 | 2.15 | Bacteroides_thetaiotaomicron_96    | Bacteria_Bacteroidetes_Bacteroidia_Bacteroidales_Bacteroidaceae_Bacteroides_100                                      |
| OTU_3327  | 9.14E-01 | 9.70E-01 | 2.77E-03 | 0.51 | 2.46 | Bacteroides_ovatus_94              | Bacteria_Bacteroidetes_Bacteroidia_Bacteroidales_Bacteroidaceae_Bacteroides_81                                       |
| OTU_3560  | 7.57E-01 | 6.57E-01 | 1.84E-01 | 1.69 | 1.07 | Roseburia_inulinivorans_91         | Bacteria_Firmicutes_Clostridia_67_Clostridiales_67_Lachnospiraceae_62_Tyzzerella_8                                   |
| OTU_383   | 8.48E-01 | 6.04E-01 | 6.87E-02 | 0.45 | 0.09 | Megasphaera_elsdenii_100           | Bacteria_Firmicutes_98_Negativicutes_98_Veillonellales_98_Veillonellaceae_98_Megasphaera_94                          |
| OTU_39720 | 7.07E-01 | 8.17E-01 | 3.32E-04 | 2.20 | 0.18 | Bacteroides_caecimuris_95          | Bacteria_Bacteroidetes_Bacteroidia_Bacteroidales_Bacteroidaceae_Bacteroides_83                                       |
| OTU_4925  | 8.06E-01 | 9.35E-01 | 4.04E-01 | 1.24 | 1.56 | Enterocloster_aldenensis_97        | Bacteria_Firmicutes_Clostridia_Clostridiales_Lachnospiraceae_Enterocloster_74                                        |
| OTU_62631 | 9.03E-01 | 6.72E-01 | 8.39E-01 | 1.30 | 1.22 | Coprococcus_comes_96               | Bacteria_Firmicutes_Clostridia_Clostridiales_Lachnospiraceae_Coprococcus_58                                          |
| OTU_683   | 7.75E-01 | 6.63E-01 | 3.95E-02 | 2.38 | 0.23 | Anaerotignum_lactatifermentans_97  | Bacteria_Firmicutes_Clostridia_Clostridiales_Lachnospiraceae_Anaerotignum_100                                        |
| OTU_7433  | 9.59E-01 | 6.04E-01 | 9.43E-01 | 1.15 | 1.17 | Escherichia_albertii_89            | Bacteria_Proteobacteria_74_Gammaproteobacteria_74_Enterobacterales_74_Enterobacteriaceae_74_Pseudescherichia_72      |
| OTU_7630  | 7.07E-01 | 6.04E-01 | 5.53E-01 | 0.96 | 0.64 | Parabacteroides_distasonis_93      | Bacteria_Bacteroidetes_Bacteroidia_Bacteroidales_Porphryomonadaceae_73_Parabacteroides_73                            |
| OTU_1172  | 7.12E-01 | 9.12E-01 | 2.55E-02 | 2.88 | 0.25 | Enterococcus_faecalis_91           | Bacteria_Firmicutes_57_Bacilli_57_Lactobacillales_55_Carnobacteriaceae_49_Catellibacoccus_47                         |
| OTU_12069 | 8.23E-01 | 9.46E-01 | 1.13E-01 | 0.75 | 1.56 | Clostridium_tepidum_97             | Bacteria_Firmicutes_Clostridia_Clostridiales_Clostridiaceae_1_97_Clostridium_sensu_stricto_96                        |
| OTU_14764 | 7.07E-01 | 6.04E-01 | 5.82E-02 | 0.84 | 1.73 | Pseudescherichia_vulneris_95       | Bacteria_Proteobacteria_Gammaproteobacteria_Enterobacterales_Enterobacteriaceae_Escherichia/Shigella_65              |
| OTU_14779 | 7.57E-01 | 9.09E-01 | 2.07E-02 | 0.62 | 1.84 | Veillonella_tobetsuensis_90        | Bacteria_Firmicutes_Clostridia_88_Clostridiales_88_Lachnospiraceae_88_Enterocloster_42                               |
| OTU_241   | 7.91E-01 | NA       | 2.84E-01 | 2.81 | 0.00 | Prevotella_oescheii_92             | Bacteria_Bacteroidetes_Bacteroidia_Bacteroidales_Prevotellaceae_Prevotella_100                                       |
| OTU_28019 | 7.57E-01 | 8.14E-01 | 6.66E-04 | 2.33 | 0.56 | Clostridium_perfringens_99         | Bacteria_Firmicutes_90_Clostridia_90_Clostridiales_90_Clostridiaceae_1_90_Sarcina_36                                 |
| OTU_3634  | 7.93E-01 | 7.02E-01 | 2.91E-02 | 1.97 | 0.57 | Clostridium_perfringens_96         | Bacteria_Firmicutes_Clostridia_Clostridiales_Clostridiaceae_1_Clostridium_sensu_stricto_68                           |
| OTU_4119  | 9.35E-01 | 9.54E-01 | 2.58E-02 | 2.35 | 0.30 | Veillonella_atypica_89             | Bacteria_Firmicutes_Clostridia_89_Clostridiales_89_Lachnospiraceae_89_Merdimonas_28                                  |
| OTU_551   | 9.67E-01 | 6.21E-01 | 1.67E-02 | 2.71 | 0.17 | Desulfovibrio_desulfuricans_97     | Bacteria_Proteobacteria_Deltaproteobacteria_Desulfovibrionales_Desulfovibrionaceae_Desulfovibrio_98                  |

|            |          |          |          |      |      |                                       |                                                                                                                      |
|------------|----------|----------|----------|------|------|---------------------------------------|----------------------------------------------------------------------------------------------------------------------|
| OTU_841    | 7.07E-01 | 7.61E-01 | 1.26E-02 | 1.70 | 0.09 | Dialister_pneumosintes_94             | Bacteria_Firmicutes_Negativicutes_Veillonellales_Veillonellaceae_Dialister_71                                        |
| OTU_9784   | 7.07E-01 | 9.85E-01 | 9.58E-04 | 1.47 | 0.18 | Anaerobacillus_alkalilacustris_92     | Bacteria_Firmicutes_Bacilli_92_Lactobacillales_75_Carnobacteriaceae_74_Isobaculum_55                                 |
| OTU_15391  | 7.82E-01 | 6.99E-01 | 4.54E-02 | 2.25 | 0.16 | Veillonella_tobetsuensis_98           | Bacteria_Firmicutes_Negativicutes_Veillonellales_Veillonellaceae_Veillonella_100                                     |
| OTU_15552  | 7.80E-01 | 7.80E-01 | 2.77E-01 | 0.78 | 1.26 | Bacteroides_kribbi_97                 | Bacteria_Bacteroidetes_Bacteroidia_Bacteroidales_Bacteroidaceae_Bacteroides_98                                       |
| OTU_16236  | 7.73E-01 | 8.14E-01 | 7.02E-01 | 1.06 | 1.20 | Falcatimonas_natans_91                | Bacteria_Firmicutes_Clostridia_60_Clostridiales_60_Lachnospiraceae_60_Falcatimonas_16                                |
| OTU_1854   | 9.37E-01 | 6.49E-01 | 7.00E-01 | 0.86 | 0.71 | Lachnodostridium_pacaense_94          | Bacteria_Firmicutes_Clostridia_Clostridiales_Lachnospiraceae_Enterocloster_45                                        |
| OTU_27132  | 9.84E-01 | 7.83E-01 | 4.51E-03 | 1.88 | 0.75 | Bacteroides_xylanisolvens_96          | Bacteria_Proteobacteria_53_Gammaproteobacteria_53_Enterobacterales_53_Enterobacteriaceae_53_Pseudeschерichia_52      |
| OTU_27475  | 7.07E-01 | 9.01E-01 | 2.89E-03 | 2.83 | 0.36 | Bacteroides_xylanisolvens_97          | Bacteria_Bacteroidetes_Bacteroidia_Bacteroidales_Bacteroidaceae_Bacteroides_100                                      |
| OTU_27764  | 9.38E-01 | 8.02E-01 | 3.15E-01 | 1.59 | 1.07 | Enterococcus_hirae_96                 | Bacteria_Firmicutes_Bacilli_Lactobacillales_98_Enterococcaceae_73_Enterococcus_52                                    |
| OTU_35148  | 8.48E-01 | 6.96E-01 | 1.92E-02 | 0.67 | 2.04 | Paraclostridium_benzoelyticum_97      | Bacteria_Firmicutes_Clostridia_Clostridiales_Peptostreptococcaceae_Paraclostridium_95                                |
| OTU_3663   | 7.10E-01 | 8.50E-01 | 5.97E-02 | 2.09 | 0.40 | Clostridium_perfringens_96            | Bacteria_Firmicutes_Clostridia_62_Clostridiales_62_Clostridiaceae_1_62_Anaerobacter_24                               |
| OTU_3796   | 8.83E-01 | 8.14E-01 | 9.19E-01 | 1.30 | 1.35 | Lachnodostridium_pacaense_97          | Bacteria_Firmicutes_Clostridia_Clostridiales_Lachnospiraceae_Enterocloster_56                                        |
| OTU_3974   | 7.07E-01 | 4.60E-01 | 1.36E-01 | 0.83 | 1.46 | Loigolactobacillus_bifermentans_89    | Bacteria_Firmicutes_Erysipelotrichia_57_Erysipelotrichales_57_Erysipelatoclostridiaceae_56_Erysipelatoclostridium_56 |
| OTU_4904   | 7.91E-01 | 9.46E-01 | 8.38E-03 | 0.05 | 1.83 | Burkholderia_rinjoensis_91            | Bacteria_Proteobacteria_Gammaproteobacteria_79_Enterobacterales_79_Enterobacteriaceae_79_Pseudeschерichia_58         |
| OTU_6324   | 7.07E-01 | 8.14E-01 | 1.83E-02 | 1.99 | 0.51 | Hungatella_hathewayi_90               | Bacteria_Firmicutes_Clostridia_66_Clostridiales_66_Lachnospiraceae_66_Falcatimonas_29                                |
| OTU_7613   | 9.00E-01 | 6.50E-01 | 2.76E-02 | 0.83 | 1.89 | Veillonella_dispar_96                 | Bacteria_Firmicutes_Negativicutes_99_Veillonellales_99_Veillonellaceae_99_Veillonella_99                             |
| OTU_9603   | 8.19E-01 | 6.04E-01 | 9.67E-02 | 1.74 | 1.00 | Clostridium_perfringens_96            | Bacteria_Firmicutes_Clostridia_99_Clostridiales_99_Clostridiaceae_1_99_Clostridium_sensu stricto_64                  |
| OTU_11713  | 9.62E-01 | 9.35E-01 | 3.07E-01 | 1.76 | 1.19 | Coprococcus_comes_97                  | Bacteria_Firmicutes_Clostridia_Clostridiales_Lachnospiraceae_Coprococcus_36                                          |
| OTU_18368  | 7.86E-01 | 6.14E-01 | 9.72E-01 | 1.15 | 1.14 | Lacrimispora_xylanolytica_91          | Bacteria_Firmicutes_Clostridia_43_Clostridiales_43_Lachnospiraceae_43_Anaerotaenia_8                                 |
| OTU_2320   | 9.79E-01 | 6.93E-01 | 3.99E-02 | 0.26 | 1.60 | Enterococcus_faecalis_92              | Bacteria_Firmicutes_Negativicutes_65_Acidaminococcales_65_Acidaminococcaceae_65_Phascolartobacterium_65              |
| OTU_28330  | 7.81E-01 | 7.34E-01 | 1.74E-02 | 1.64 | 0.75 | Clostridium_perfringens_96            | Bacteria_Firmicutes_Clostridia_Clostridiales_Clostridiaceae_1_80_Sarcina_23                                          |
| OTU_32416  | 7.07E-01 | 6.68E-01 | 2.80E-01 | 1.74 | 1.25 | Bacteroides_thetaiotaomicron_97       | Bacteria_Bacteroidetes_Bacteroidia_Bacteroidales_Bacteroidaceae_Bacteroides_100                                      |
| OTU_5443   | 8.06E-01 | 6.72E-01 | 1.40E-02 | 3.16 | 0.23 | Streptococcus_sinensis_98             | Bacteria_Firmicutes_Bacilli_Lactobacillales_Streptococcaceae_Streptococcus_100                                       |
| OTU_61655  | 9.38E-01 | 6.04E-01 | 1.63E-02 | 0.62 | 1.86 | Bacteroides_thetaiotaomicron_97       | Bacteria_Bacteroidetes_Bacteroidia_Bacteroidales_Bacteroidaceae_Bacteroides_100                                      |
| OTU_713    | 8.25E-01 | 6.63E-01 | 2.94E-01 | 0.77 | 0.39 | Collinsella_intestinalis_100          | Bacteria_Actinobacteria_Coriobacteriia_Coriobacteriales_Coriobacteriaceae_Collinsella_100                            |
| OTU_101243 | 8.48E-01 | 6.04E-01 | 1.25E-02 | 3.05 | 0.15 | Bacteroides_xylanisolvens_98          | Bacteria_Bacteroidetes_Bacteroidia_Bacteroidales_Bacteroidaceae_Bacteroides_100                                      |
| OTU_12469  | 8.54E-01 | 9.34E-01 | 1.34E-02 | 1.59 | 0.16 | Bacteroides_stercoris_95              | Bacteria_Bacteroidetes_Bacteroidia_Bacteroidales_Bacteroidaceae_Bacteroides_72                                       |
| OTU_1492   | 7.07E-01 | 9.90E-01 | 3.73E-02 | 2.19 | 0.14 | Bacteroides_stercoris_94              | Bacteria_Bacteroidetes_Bacteroidia_Bacteroidales_Porphyrimonadaceae_56_Parabacteroides_56                            |
| OTU_1508   | 7.91E-01 | 7.73E-01 | 3.21E-02 | 1.56 | 0.53 | Bacteroides_thetaiotaomicron_90       | Bacteria_Bacteroidetes_99_Bacteroidia_99_Bacteroidales_99_Bacteroidaceae_97_Bacteroides_71                           |
| OTU_346    | 8.33E-01 | NA       | 1.37E-01 | 2.40 | 0.00 | Anaerostipes_hadrus_96                | Bacteria_Firmicutes_Clostridia_Clostridiales_Lachnospiraceae_Anaerostipes_36                                         |
| OTU_364    | NA       | 7.46E-01 | 2.04E-01 | 0.00 | 1.88 | Simplicispira_soli_98                 | Bacteria_Proteobacteria_Betaproteobacteria_Burkholderiales_Comamonadaceae_Simplicispira_96                           |
| OTU_39644  | 8.61E-01 | 6.47E-01 | 3.08E-05 | 2.66 | 0.23 | Bacteroides_xylanisolvens_98          | Bacteria_Bacteroidetes_Bacteroidia_Bacteroidales_Bacteroidaceae_Bacteroides_100                                      |
| OTU_46554  | 7.07E-01 | 6.04E-01 | 3.80E-02 | 0.56 | 1.70 | Erysipelatoclostridium_amosum_96      | Bacteria_Firmicutes_Erysipelotrichia_Erysipelotrichales_Erysipelatoclostridiaceae_Erysipelatoclostridium_100         |
| OTU_5028   | 9.87E-01 | 8.87E-01 | 1.31E-01 | 0.79 | 1.30 | Flavonifractor_plautii_92             | Bacteria_Firmicutes_97_Clostridia_97_Clostridiales_97_Ruminococcaceae_97_Flavonifractor_97                           |
| OTU_672    | 8.29E-01 | 6.04E-01 | 1.70E-02 | 2.66 | 0.20 | Bacteroides_stercoris_91              | Bacteria_Bacteroidetes_96_Bacteroidia_95_Bacteroidales_95_Bacteroidaceae_95_Mediterranea_53                          |
| OTU_7275   | 9.31E-01 | 9.25E-01 | 2.61E-01 | 0.92 | 1.34 | Lachnodostridium_pacaense_95          | Bacteria_Firmicutes_Clostridia_Clostridiales_Lachnospiraceae_Clostridium_XIVa_73                                     |
| OTU_75479  | 7.07E-01 | 6.35E-01 | 2.07E-01 | 2.20 | 0.55 | Collinsella_aerofaciens_96            | Bacteria_Actinobacteria_Coriobacteriia_Coriobacteriales_Coriobacteriaceae_Collinsella_100                            |
| OTU_960    | 8.47E-01 | 9.53E-01 | 2.77E-01 | 0.39 | 0.20 | Enterocloster_asparagiformis_96       | Bacteria_Firmicutes_Clostridia_Clostridiales_Lachnospiraceae_Clostridium_XIVa_63                                     |
| OTU_10594  | 9.61E-01 | 9.64E-01 | 2.52E-02 | 0.55 | 1.65 | Bacteroides_fragilis_94               | Bacteria_Bacteroidetes_98_Bacteroidia_98_Bacteroidales_98_Bacteroidaceae_98_Bacteroides_91                           |
| OTU_1144   | 7.07E-01 | 8.14E-01 | 6.69E-03 | 0.14 | 2.75 | Phascolartobacterium_faecium_100      | Bacteria_Firmicutes_Negativicutes_Acidaminococcales_Acidaminococcaceae_Phascolartobacterium_100                      |
| OTU_1156   | 9.52E-01 | 8.73E-01 | 9.69E-01 | 0.40 | 0.39 | Megamonas_funiformis_100              | Bacteria_Firmicutes_Negativicutes_94_Selenomonadales_94_Selenomonadaceae_94_Megamonas_94                             |
| OTU_13348  | 7.57E-01 | 9.90E-01 | 9.14E-01 | 1.24 | 1.19 | Coprococcus_comes_97                  | Bacteria_Firmicutes_Clostridia_Clostridiales_Lachnospiraceae_Coprococcus_45                                          |
| OTU_1378   | 9.91E-01 | 9.57E-01 | 1.12E-01 | 1.73 | 0.87 | Clostridium_symbiosum_90              | Bacteria_Firmicutes_99_Clostridia_99_Clostridiales_99_Lachnospiraceae_89_Moryella_17                                 |
| OTU_1767   | 9.05E-01 | 9.97E-01 | 8.44E-01 | 1.27 | 1.45 | Limosilactobacillus_mucosae_90        | Bacteria_Proteobacteria_85_Gammaproteobacteria_85_Enterobacterales_85_Enterobacteriaceae_85_Pseudeschерichia_84      |
| OTU_40547  | 7.85E-01 | 9.70E-01 | 8.49E-01 | 1.08 | 1.15 | Pseudeschерichia_vulneris_90          | Bacteria_Proteobacteria_91_Gammaproteobacteria_91_Enterobacterales_90_Enterobacteriaceae_87_Pseudeschерichia_86      |
| OTU_4173   | 8.37E-01 | 9.53E-01 | 1.18E-01 | 1.72 | 1.08 | Pseudeschерichia_vulneris_96          | Bacteria_Proteobacteria_83_Gammaproteobacteria_83_Enterobacterales_83_Enterobacteriaceae_81_Pseudeschерichia_71      |
| OTU_69035  | 7.07E-01 | 6.04E-01 | 5.05E-02 | 0.34 | 0.04 | Veillonella_denticariosi_98           | Bacteria_Firmicutes_Negativicutes_Veillonellales_Veillonellaceae_Veillonella_100                                     |
| OTU_982    | 8.12E-01 | 9.12E-01 | 7.23E-02 | 2.29 | 0.24 | Lacrimispora_aerotolerans_95          | Bacteria_Firmicutes_Clostridia_Clostridiales_Lachnospiraceae_99_Hungatella_49                                        |
| OTU_11995  | 8.61E-01 | 9.25E-01 | 3.94E-01 | 1.12 | 0.85 | Pseudeschерichia_vulneris_96          | Bacteria_Proteobacteria_Gammaproteobacteria_Enterobacterales_Enterobacteriaceae_Escherichia/Shigella_79              |
| OTU_1909   | 8.82E-01 | 7.76E-01 | 2.70E-01 | 1.69 | 1.11 | Bacteroides_kribbi_97                 | Bacteria_Bacteroidetes_Bacteroidia_Bacteroidales_Bacteroidaceae_Bacteroides_100                                      |
| OTU_2060   | 9.01E-01 | 9.75E-01 | 2.71E-02 | 1.30 | 0.44 | Peptoniphilus_koenoeneniae_96         | Bacteria_Firmicutes_Clostridia_Clostridiales_Peptoniphilaceae_Peptoniphilus_100                                      |
| OTU_43208  | 7.59E-01 | 7.02E-01 | 2.11E-02 | 1.82 | 0.30 | Veillonella_atypica_96                | Bacteria_Firmicutes_Negativicutes_Veillonellales_97_Veillonellaceae_97_Veillonella_97                                |
| OTU_444    | 9.37E-01 | 8.05E-01 | 8.00E-02 | 3.42 | 0.08 | Vallitalea_pronyensis_87              | Bacteria_Firmicutes_97_Clostridia_95_Clostridiales_95_Peptostreptococcaceae_27_Criibacterium_27                      |
| OTU_4771   | 9.07E-01 | 7.01E-01 | 6.91E-01 | 0.94 | 1.20 | Escherichia_albertii_91               | Bacteria_Proteobacteria_99_Gammaproteobacteria_99_Enterobacterales_99_Enterobacteriaceae_99_Pseudeschерichia_92      |
| OTU_585    | 7.07E-01 | 6.04E-01 | 2.14E-01 | 1.63 | 0.34 | Cetobacterium_somerae_92              | Bacteria_Fusobacteria_Fusobacteriia_Fusobacteriales_Fusobacteriaceae_98_Cetobacterium_72                             |
| OTU_8536   | 7.80E-01 | 8.28E-01 | 2.96E-03 | 2.00 | 0.68 | Clostridium_tarantellae_94            | Bacteria_Firmicutes_Clostridia_Clostridiales_Lachnospiraceae_67_Robinsoniella_11                                     |
| OTU_906    | 1.00E+00 | 9.41E-01 | 2.21E-01 | 0.46 | 0.21 | Catenibacterium_mitsuokai_94          | Bacteria_Firmicutes_Erysipelotrichia_Erysipelotrichales_Erysipelotrichaceae_Catenibacterium_97                       |
| OTU_9789   | 8.85E-01 | 7.31E-01 | 5.70E-03 | 2.01 | 0.63 | Bacteroides_caccae_97                 | Bacteria_Bacteroidetes_Bacteroidia_Bacteroidales_Bacteroidaceae_Bacteroides_100                                      |
| OTU_9842   | 8.16E-01 | 6.04E-01 | 6.91E-04 | 2.07 | 0.39 | Bacteroides_faechinchillae_97         | Bacteria_Bacteroidetes_Bacteroidia_Bacteroidales_Bacteroidaceae_Bacteroides_100                                      |
| OTU_1030   | 7.07E-01 | 6.04E-01 | 2.19E-01 | 0.36 | 0.10 | Phocaeicola_vulgatus_95               | Bacteria_Bacteroidetes_Bacteroidia_Bacteroidales_Bacteroidaceae_Phocaeicola_64                                       |
| OTU_10686  | 9.60E-01 | 6.04E-01 | 1.24E-02 | 1.47 | 0.07 | Phascolartobacterium_succinatutens_97 | Bacteria_Firmicutes_Negativicutes_Acidaminococcales_Acidaminococcaceae_Phascolartobacterium_100                      |
| OTU_1408   | 7.07E-01 | 6.35E-01 | 1.66E-01 | 0.81 | 1.46 | Enterococcus_hirae_97                 | Bacteria_Firmicutes_99_Bacilli_98_Lactobacillales_97_Enterococcaceae_84_Vagococcus_30                                |
| OTU_233    | NA       | 7.61E-01 | 2.93E-01 | 0.00 | 1.96 | Elstera_cyanobacteriorum_100          | Bacteria_Proteobacteria_Alphaproteobacteria_Rhodospirillales_Rhodospirillaceae_Elstera_100                           |
| OTU_30066  | 7.07E-01 | 4.60E-01 | 1.82E-01 | 1.60 | 0.98 | Erysipelatoclostridium_amosum_96      | Bacteria_Firmicutes_Erysipelotrichia_Erysipelotrichales_Erysipelatoclostridiaceae_Erysipelatoclostridium_100         |
| OTU_34989  | 9.04E-01 | 7.31E-01 | 5.05E-02 | 1.58 | 0.61 | Bacteroides_thetaiotaomicron_95       | Bacteria_Bacteroidetes_Bacteroidia_Bacteroidales_Bacteroidaceae_Bacteroides_88                                       |
| OTU_47747  | 7.07E-01 | 6.76E-01 | 2.48E-02 | 1.50 | 0.09 | Veillonella_atypica_97                | Bacteria_Firmicutes_Negativicutes_Veillonellales_Veillonellaceae_Veillonella_100                                     |
| OTU_51719  | 7.57E-01 | 6.83E-01 | 3.96E-01 | 0.84 | 1.15 | Enterococcus_faecalis_96              | Bacteria_Firmicutes_Bacilli_Lactobacillales_99_Enterococcaceae_76_Enterococcus_51                                    |



|            |          |          |          |      |      |                                             |                                                                                                                 |
|------------|----------|----------|----------|------|------|---------------------------------------------|-----------------------------------------------------------------------------------------------------------------|
| OTU_5303   | 9.78E-01 | 8.65E-01 | 1.65E-02 | 1.29 | 0.29 | Hungatella_effluvii_96                      | Bacteria_Firmicutes_Clostridia_Clostridiales_Lachnospiraceae_Hungatella_61                                      |
| OTU_8811   | 8.25E-01 | 6.04E-01 | 1.92E-02 | 0.61 | 1.42 | Enterococcus_faecalis_97                    | Bacteria_Firmicutes_Bacilli_Lactobacillales_99_Enterococcaceae_89_Enterococcus_74                               |
| OTU_1982   | 9.14E-01 | 6.04E-01 | 7.37E-01 | 0.17 | 0.12 | Faecalibacterium_prausnitzii_96             | Bacteria_Firmicutes_Clostridia_78_Clostridiales_78_Ruminococcaceae_78_Faecalibacterium_65                       |
| OTU_2300   | 7.86E-01 | 9.72E-01 | 6.40E-03 | 0.41 | 1.41 | Pseudescherichia_vulneris_95                | Bacteria_Proteobacteria_Gammaproteobacteria_Enterobacterales_Enterobacteriaceae_Pseudescherichia_51             |
| OTU_27204  | 7.07E-01 | 9.70E-01 | 3.68E-02 | 0.81 | 1.38 | Pseudescherichia_vulneris_94                | Bacteria_Proteobacteria_Gammaproteobacteria_Enterobacterales_Enterobacteriaceae_Pseudescherichia_83             |
| OTU_28142  | 7.80E-01 | 6.04E-01 | 1.68E-02 | 0.25 | 1.57 | Phascolarctobacterium_faecium_94            | Bacteria_Firmicutes_Negativicutes_99_Acidaminococcales_99_Acidaminococcaceae_99_Phascolarctobacterium_98        |
| OTU_29633  | 7.07E-01 | 9.41E-01 | 9.21E-02 | 0.77 | 2.07 | Bacteroides_nordii_97                       | Bacteria_Bacteroidetes_Bacteroidia_Bacteroidales_Bacteroidaceae_Bacteroides_100                                 |
| OTU_3729   | 9.14E-01 | 8.02E-01 | 1.34E-01 | 0.72 | 1.17 | Shigella_dysenteriae_88                     | Bacteria_Proteobacteria_73_Gammaproteobacteria_73_Enterobacterales_73_Enterobacteriaceae_73_Pseudescherichia_73 |
| OTU_4205   | 7.57E-01 | 6.04E-01 | 7.03E-03 | 2.27 | 0.26 | Dialister_pneumosintes_90                   | Bacteria_Firmicutes_68_Negativicutes_68_Veillonellales_68_Veillonellaceae_68_Dialister_50                       |
| OTU_46529  | 7.91E-01 | 8.71E-01 | 4.09E-02 | 0.76 | 1.50 | Pseudescherichia_vulneris_95                | Bacteria_Proteobacteria_98_Gammaproteobacteria_98_Enterobacterales_98_Enterobacteriaceae_97_Pseudescherichia_88 |
| OTU_4682   | 7.46E-01 | 6.04E-01 | 1.69E-01 | 2.01 | 0.46 | Streptococcus_peroris_96                    | Bacteria_Firmicutes_Bacilli_Lactobacillales_Streptococcaceae_Streptococcus_100                                  |
| OTU_4744   | 7.07E-01 | 6.04E-01 | 1.64E-02 | 2.47 | 0.17 | Parabacteroides_merdae_95                   | Bacteria_Bacteroidetes_Bacteroidia_Bacteroidales_Porphyromonadaceae_90_Parabacteroides_90                       |
| OTU_5595   | 9.27E-01 | 8.94E-01 | 3.82E-05 | 2.24 | 0.45 | Mediterraneibacter_glycyrrhizinilyticus_100 | Bacteria_Firmicutes_Clostridia_Clostridiales_Lachnospiraceae_Mediterraneibacter_100                             |
| OTU_6593   | 7.07E-01 | 7.51E-01 | 2.84E-01 | 2.51 | 0.34 | Kineothrix_alysoides_98                     | Bacteria_Firmicutes_Clostridia_Clostridiales_Lachnospiraceae_Kineothrix_78                                      |
| OTU_77824  | 8.48E-01 | 6.05E-01 | 1.10E-02 | 1.89 | 0.60 | Bacteroides_faecis_96                       | Bacteria_Bacteroidetes_Bacteroidia_Bacteroidales_Bacteroidaceae_Bacteroides_100                                 |
| OTU_1347   | 9.53E-01 | 6.04E-01 | 5.27E-03 | 0.82 | 2.14 | Eisenbergiella_tayi_96                      | Bacteria_Firmicutes_Clostridia_Clostridiales_Lachnospiraceae_Eisenbergiella_100                                 |
| OTU_2024   | 7.07E-01 | 7.02E-01 | 6.69E-03 | 1.51 | 0.10 | Veillonella_dispar_95                       | Bacteria_Firmicutes_Negativicutes_Veillonellales_Veillonellaceae_Dialister_55                                   |
| OTU_2480   | 9.23E-01 | 6.04E-01 | 9.61E-01 | 1.04 | 1.02 | Lachnoclostridium_pacense_94                | Bacteria_Firmicutes_Clostridia_Clostridiales_Lachnospiraceae_84_Clostridium_XIVa_32                             |
| OTU_403    | 7.57E-01 | 6.21E-01 | 2.28E-01 | 0.81 | 0.16 | Mitsuokella_jalaludini_96                   | Bacteria_Firmicutes_Negativicutes_Selenomonadales_Selenomonadaceae_Mitsuokella_100                              |
| OTU_4712   | 9.78E-01 | 9.74E-01 | 8.37E-03 | 2.30 | 0.26 | Phascolarctobacterium_succinatutens_89      | Bacteria_Firmicutes_79_Negativicutes_79_Acidaminococcales_79_Acidaminococcaceae_79_Phascolarctobacterium_79     |
| OTU_13666  | 7.07E-01 | 9.25E-01 | 9.33E-01 | 0.39 | 0.43 | Kluyvera_georgiana_94                       | Bacteria_Proteobacteria_Gammaproteobacteria_Enterobacterales_93_Enterobacteriaceae_92_Pseudescherichia_62       |
| OTU_1388   | 7.57E-01 | 6.77E-01 | 2.67E-01 | 0.35 | 0.16 | Parabacteroides_distasonis_96               | Bacteria_Bacteroidetes_Bacteroidia_Bacteroidales_Porphyromonadaceae_Parabacteroides_100                         |
| OTU_14917  | 7.07E-01 | 8.28E-01 | 3.49E-01 | 1.12 | 1.72 | Veillonella_tobetsuensis_94                 | Bacteria_Firmicutes_Negativicutes_93_Veillonellales_86_Veillonellaceae_86_Veillonella_78                        |
| OTU_1595   | 9.66E-01 | 8.08E-01 | 7.16E-01 | 1.17 | 1.03 | Lachnoclostridium_phytofermentans_90        | Bacteria_Firmicutes_72_Clostridia_72_Clostridiales_72_Lachnospiraceae_72_Anaerotaenia_14                        |
| OTU_19030  | 7.07E-01 | 6.14E-01 | 4.57E-06 | 2.49 | 0.37 | Bacteroides_faecis_97                       | Bacteria_Bacteroidetes_Bacteroidia_Bacteroidales_Bacteroidaceae_Bacteroides_100                                 |
| OTU_1904   | 8.94E-01 | 6.04E-01 | 1.52E-02 | 1.74 | 0.15 | Parabacteroides_distasonis_97               | Bacteria_Bacteroidetes_Bacteroidia_Bacteroidales_Porphyromonadaceae_98_Parabacteroides_98                       |
| OTU_27501  | 7.46E-01 | 7.49E-01 | 6.08E-02 | 1.86 | 0.91 | Bacteroides_uniformis_97                    | Bacteria_Bacteroidetes_Bacteroidia_Bacteroidales_Bacteroidaceae_Bacteroides_100                                 |
| OTU_28714  | 9.79E-01 | 6.04E-01 | 7.84E-01 | 1.07 | 1.21 | Hungatella_hathewayi_97                     | Bacteria_Firmicutes_Clostridia_Clostridiales_Lachnospiraceae_Hungatella_90                                      |
| OTU_33561  | 9.67E-01 | 4.60E-01 | 1.83E-03 | 2.34 | 0.15 | Bacteroides_caecimuris_95                   | Bacteria_Bacteroidetes_Bacteroidia_Bacteroidales_Bacteroidaceae_Bacteroides_79                                  |
| OTU_3582   | 9.65E-01 | 8.24E-01 | 4.01E-02 | 1.82 | 0.53 | Enterococcus_thailandicus_90                | Bacteria_Firmicutes_Clostridia_42_Clostridiales_42_Clostridiaceae_1_42_Anaerobacter_23                          |
| OTU_3938   | 9.87E-01 | 8.65E-01 | 7.73E-01 | 1.29 | 1.43 | Roseburia_inulinivorans_96                  | Bacteria_Firmicutes_Clostridia_Clostridiales_Lachnospiraceae_Roseburia_57                                       |
| OTU_7438   | 7.07E-01 | 9.69E-01 | 4.31E-02 | 0.92 | 1.52 | Escherichia_coli_96                         | Bacteria_Proteobacteria_Gammaproteobacteria_Enterobacterales_Enterobacteriaceae_96_Escherichia/Shigella_66      |
| OTU_9708   | 9.64E-01 | 9.32E-01 | 9.71E-01 | 1.06 | 1.05 | Shigella_dysenteriae_95                     | Bacteria_Proteobacteria_92_Gammaproteobacteria_92_Enterobacterales_92_Enterobacteriaceae_92_Pseudescherichia_82 |
| OTU_13083  | 8.36E-01 | 7.89E-01 | 3.36E-02 | 0.78 | 1.54 | Pseudescherichia_vulneris_91                | Bacteria_Proteobacteria_97_Gammaproteobacteria_97_Enterobacterales_96_Enterobacteriaceae_90_Pseudescherichia_88 |
| OTU_13407  | 9.72E-01 | 9.69E-01 | 3.16E-03 | 1.88 | 0.27 | Bacteroides_caecimuris_95                   | Bacteria_Bacteroidetes_Bacteroidia_Bacteroidales_Bacteroidaceae_Bacteroides_89                                  |
| OTU_1879   | 9.29E-01 | 6.61E-01 | 3.38E-03 | 1.83 | 0.42 | Sutterella_wadsworthensis_97                | Bacteria_Proteobacteria_Betaproteobacteria_Burkholderiales_Sutterellaceae_Sutterella_100                        |
| OTU_2008   | 7.07E-01 | 6.04E-01 | 4.50E-01 | 1.32 | 0.85 | Pseudescherichia_vulneris_89                | Bacteria_Proteobacteria_98_Gammaproteobacteria_98_Enterobacterales_98_Enterobacteriaceae_98_Pseudescherichia_96 |
| OTU_3096   | 7.57E-01 | 6.68E-01 | 2.28E-01 | 1.70 | 1.03 | Enterocloster_clostridioformis_96           | Bacteria_Firmicutes_Clostridia_Clostridiales_Lachnospiraceae_Clostridium_XIVa_27                                |
| OTU_3356   | 7.07E-01 | 6.04E-01 | 2.29E-01 | 0.79 | 1.41 | Eubacterium_callanderi_95                   | Bacteria_Firmicutes_Clostridia_Clostridiales_Eubacteriaceae_Pseudoramibacter_60                                 |
| OTU_39331  | 9.04E-01 | 9.97E-01 | 6.48E-02 | 0.78 | 1.33 | Shigella_dysenteriae_91                     | Bacteria_Proteobacteria_89_Gammaproteobacteria_89_Enterobacterales_89_Enterobacteriaceae_89_Pseudescherichia_89 |
| OTU_44288  | 7.07E-01 | 6.90E-01 | 1.16E-03 | 2.02 | 0.18 | Streptococcus_mitis_98                      | Bacteria_Firmicutes_Bacilli_Lactobacillales_Streptococcaceae_Streptococcus_100                                  |
| OTU_4674   | 8.57E-01 | 6.35E-01 | 5.62E-03 | 2.14 | 0.36 | Streptococcus_cristatus_95                  | Bacteria_Firmicutes_Bacilli_97_Lactobacillales_97_Streptococcaceae_93_Streptococcus_87                          |
| OTU_48086  | 7.07E-01 | 9.75E-01 | 1.66E-01 | 0.78 | 1.27 | Veillonella_dispar_86                       | Bacteria_Proteobacteria_85_Gammaproteobacteria_85_Enterobacterales_84_Enterobacteriaceae_83_Pseudescherichia_82 |
| OTU_9669   | 8.06E-01 | 9.21E-01 | 2.07E-02 | 1.73 | 0.74 | Enterocloster_citroniae_96                  | Bacteria_Firmicutes_Clostridia_Clostridiales_Lachnospiraceae_Enterocloster_78                                   |
| OTU_105384 | 7.07E-01 | 9.94E-01 | 5.91E-01 | 0.24 | 0.10 | Veillonella_tobetsuensis_98                 | Bacteria_Firmicutes_Negativicutes_Veillonellales_Veillonellaceae_Veillonella_100                                |
| OTU_11698  | 8.25E-01 | 6.04E-01 | 1.26E-01 | 1.22 | 0.53 | Enterocloster_asparagiformis_96             | Bacteria_Firmicutes_Clostridia_Clostridiales_Lachnospiraceae_Clostridium_XIVa_62                                |
| OTU_14573  | 9.08E-01 | 8.53E-01 | 2.76E-02 | 1.71 | 0.71 | Pseudescherichia_vulneris_97                | Bacteria_Proteobacteria_Gammaproteobacteria_Enterobacterales_Enterobacteriaceae_Escherichia/Shigella_53         |
| OTU_1457   | 7.10E-01 | 8.85E-01 | 2.52E-01 | 0.88 | 0.33 | Sutterella_massiliensis_92                  | Bacteria_Proteobacteria_98_Betaproteobacteria_98_Burkholderiales_98_Sutterellaceae_96_Sutterella_96             |
| OTU_27375  | 8.63E-01 | 8.65E-01 | 4.94E-02 | 0.81 | 1.35 | Escherichia_albertii_93                     | Bacteria_Proteobacteria_97_Gammaproteobacteria_97_Enterobacterales_97_Enterobacteriaceae_95_Pseudescherichia_86 |
| OTU_716    | 8.51E-01 | 6.04E-01 | 9.76E-01 | 0.53 | 0.54 | Blautia_schinkii_92                         | Bacteria_Firmicutes_Clostridia_Clostridiales_Lachnospiraceae_Merdimonas_12                                      |
| OTU_8055   | 8.48E-01 | 6.04E-01 | 5.37E-01 | 1.26 | 1.02 | Ruminococcus_gnavus_96                      | Bacteria_Firmicutes_Clostridia_Clostridiales_Lachnospiraceae_97_Dorea_52                                        |
| OTU_944    | 7.07E-01 | 6.04E-01 | 6.51E-01 | 1.08 | 1.62 | Enterococcus_dispar_91                      | Bacteria_Firmicutes_Bacilli_Lactobacillales_86_Carnobacteriaceae_73_Isobaculum_59                               |
| OTU_13780  | 7.10E-01 | 6.62E-01 | 1.45E-01 | 1.34 | 0.79 | Escherichia_albertii_90                     | Bacteria_Proteobacteria_86_Gammaproteobacteria_86_Enterobacterales_84_Enterobacteriaceae_82_Pseudescherichia_81 |
| OTU_1395   | 7.07E-01 | 6.63E-01 | 3.34E-02 | 0.53 | 2.02 | Phascolarctobacterium_faecium_90            | Bacteria_Firmicutes_Negativicutes_77_Acidaminococcales_77_Acidaminococcaceae_77_Phascolarctobacterium_77        |
| OTU_2296   | 1.00E+00 | 6.04E-01 | 8.33E-01 | 1.03 | 1.12 | Clostridium_scindens_96                     | Bacteria_Firmicutes_Clostridia_Clostridiales_Lachnospiraceae_Clostridium_XIVa_88                                |
| OTU_24502  | 9.34E-01 | 6.76E-01 | 5.28E-02 | 1.31 | 0.62 | Dorea_longicatena_96                        | Bacteria_Firmicutes_Clostridia_Clostridiales_Lachnospiraceae_Dorea_64                                           |
| OTU_3672   | 7.07E-01 | 9.46E-01 | 2.93E-01 | 1.18 | 0.86 | Clostridium_symbiosum_96                    | Bacteria_Firmicutes_Clostridia_Clostridiales_Lachnospiraceae_Clostridium_XIVa_77                                |
| OTU_4370   | 7.74E-01 | 6.80E-01 | 1.25E-01 | 1.01 | 0.30 | Peptoniphilus_tyrrelliae_97                 | Bacteria_Firmicutes_Clostridia_Clostridiales_Peptoniphilaceae_Peptoniphilus_100                                 |
| OTU_48666  | 7.07E-01 | 7.42E-01 | 1.58E-02 | 0.64 | 1.44 | Enterocloster_clostridioformis_97           | Bacteria_Firmicutes_Clostridia_Clostridiales_Lachnospiraceae_Enterocloster_97                                   |
| OTU_5657   | 8.06E-01 | 6.04E-01 | 5.26E-02 | 2.26 | 0.42 | Turicibacter_sanguinis_93                   | Bacteria_Firmicutes_Erysipelotrichia_88_Erysipelotrichales_88_Erysipelotrichaceae_88_Turicibacter_88            |
| OTU_6095   | 9.87E-01 | 6.04E-01 | 2.58E-02 | 2.17 | 0.33 | Turicibacter_sanguinis_93                   | Bacteria_Firmicutes_96_Erysipelotrichia_92_Erysipelotrichales_92_Erysipelotrichaceae_92_Turicibacter_92         |
| OTU_8123   | 8.06E-01 | 7.99E-01 | 1.07E-02 | 1.59 | 0.63 | Veillonella_atypica_95                      | Bacteria_Firmicutes_Negativicutes_Veillonellales_Veillonellaceae_Veillonella_100                                |
| OTU_11663  | 7.07E-01 | 6.50E-01 | 9.51E-01 | 1.29 | 1.27 | Hungatella_effluvii_97                      | Bacteria_Firmicutes_Clostridia_Clostridiales_Lachnospiraceae_Hungatella_98                                      |
| OTU_12289  | 8.06E-01 | 9.34E-01 | 4.04E-03 | 2.02 | 0.28 | Bacteroides_stercoris_97                    | Bacteria_Bacteroidetes_Bacteroidia_Bacteroidales_Bacteroidaceae_Bacteroides_95                                  |
| OTU_14609  | 7.07E-01 | 9.65E-01 | 2.07E-02 | 1.31 | 0.53 | Bacteroides_kribbi_96                       | Bacteria_Bacteroidetes_Bacteroidia_Bacteroidales_Bacteroidaceae_Bacteroides_100                                 |
| OTU_15738  | 8.23E-01 | 8.36E-01 | 4.89E-01 | 1.49 | 1.15 | Roseburia_inulinivorans_97                  | Bacteria_Firmicutes_Clostridia_Clostridiales_Lachnospiraceae_Roseburia_57                                       |
| OTU_2120   | 7.59E-01 | 6.63E-01 | 9.78E-01 | 1.24 | 1.23 | Bacteroides_thetaiotaomicron_98             | Bacteria_Bacteroidetes_Bacteroidia_99_Bacteroidales_99_Bacteroidaceae_99_Bacteroides_89                         |

|           |          |          |          |      |      |                                        |                                                                                                                 |
|-----------|----------|----------|----------|------|------|----------------------------------------|-----------------------------------------------------------------------------------------------------------------|
| OTU_21558 | 8.85E-01 | 7.30E-01 | 3.61E-03 | 1.56 | 0.35 | Phocaeicola_vulgatus_97                | Bacteria_Bacteroidetes_Bacteroidia_Bacteroidales_Bacteroidaceae_Phocaeicola_54                                  |
| OTU_2200  | 1.00E+00 | 8.28E-01 | 3.33E-02 | 0.67 | 1.35 | Gibbsiella_greigii_87                  | Bacteria_Proteobacteria_90_Gammaproteobacteria_90_Enterobacterales_89_Enterobacteriaceae_89_Pseudescherichia_89 |
| OTU_370   | 9.06E-01 | 8.48E-01 | 9.78E-01 | 0.45 | 0.46 | Adlercreutzia_muris_95                 | Bacteria_Actinobacteria_99_Coriobacteriia_99_Eggerthellales_84_Eggerthellaceae_84_Adlercreutzia_79              |
| OTU_58537 | 7.85E-01 | 9.61E-01 | 9.94E-02 | 0.81 | 1.45 | Hungatella_hathewayi_97                | Bacteria_Firmicutes_Clostridia_Clostridiales_Lachnospiraceae_Hungatella_69                                      |
| OTU_6687  | 7.57E-01 | 7.31E-01 | 9.85E-01 | 1.01 | 1.00 | Flavonifractor_plautii_95              | Bacteria_Firmicutes_Clostridia_Clostridiales_Ruminococcaceae_Flavonifractor_100                                 |
| OTU_724   | 8.67E-01 | 9.25E-01 | 6.76E-01 | 0.18 | 0.11 | Streptococcus_thermophilus_100         | Bacteria_Firmicutes_75_Bacilli_72_Lactobacillales_71_Enterococcaceae_30_Pilibacter_25                           |
| OTU_8729  | 8.82E-01 | 7.79E-01 | 2.80E-02 | 0.78 | 1.66 | Enterocloster_clostridioformis_96      | Bacteria_Firmicutes_Clostridia_Clostridiales_Lachnospiraceae_Enterocloster_98                                   |
| OTU_1168  | 7.07E-01 | 8.14E-01 | 3.03E-02 | 2.12 | 0.53 | Enterococcus_faecalis_97               | Bacteria_Firmicutes_Bacilli_Lactobacillales_Enterococcaceae_82_Enterococcus_61                                  |
| OTU_1192  | 9.66E-01 | 9.85E-01 | 3.10E-01 | 0.19 | 0.36 | Phocaeicola_coprophilus_90             | Bacteria_Bacteroidetes_91_Bacteroidia_91_Bacteroidales_91_Bacteroidaceae_91_Phocaeicola_85                      |
| OTU_1229  | 9.92E-01 | 6.66E-01 | 8.27E-03 | 0.48 | 1.48 | Phocaeicola_coprophilus_95             | Bacteria_Bacteroidetes_73_Bacteroidia_73_Bacteroidales_73_Bacteroidaceae_73_Phocaeicola_51                      |
| OTU_1363  | 9.38E-01 | 9.42E-01 | 6.19E-03 | 1.51 | 0.38 | Pseudescherichia_vulneris_97           | Bacteria_Proteobacteria_75_Gammaproteobacteria_75_Enterobacterales_75_Enterobacteriaceae_75_Pseudescherichia_57 |
| OTU_13942 | 7.07E-01 | 8.73E-01 | 1.31E-02 | 1.71 | 0.35 | Bacteroides_caecimuris_96              | Bacteria_Bacteroidetes_Bacteroidia_Bacteroidales_Bacteroidaceae_Bacteroides_69                                  |
| OTU_1405  | 9.67E-01 | 9.41E-01 | 7.59E-01 | 1.04 | 1.14 | Pseudescherichia_vulneris_99           | Bacteria_Proteobacteria_Gammaproteobacteria_Enterobacterales_Enterobacteriaceae_Escherichia/Shigella_99         |
| OTU_16806 | 7.12E-01 | 7.31E-01 | 5.27E-01 | 0.58 | 0.35 | Veillonella_rogosae_97                 | Bacteria_Firmicutes_Negativicutes_Veillonellales_Veillonellaceae_Veillonella_100                                |
| OTU_2063  | 7.11E-01 | 6.72E-01 | 9.22E-02 | 1.19 | 0.28 | Peptoniphilus_duerdenii_96             | Bacteria_Firmicutes_Clostridia_Clostridiales_Peptoniphilaceae_93_Peptoniphilus_92                               |
| OTU_2482  | 9.14E-01 | 8.42E-01 | 1.36E-01 | 0.80 | 1.40 | Hungatella_effluvii_96                 | Bacteria_Firmicutes_Clostridia_Clostridiales_Lachnospiraceae_Hungatella_99                                      |
| OTU_2870  | 9.59E-01 | 6.59E-01 | 1.18E-01 | 0.71 | 1.35 | Falcatimonas_natans_90                 | Bacteria_Firmicutes_Clostridia_68_Clostridiales_68_Lachnospiraceae_68_Falcatimonas_20                           |
| OTU_29225 | 9.87E-01 | 9.54E-01 | 7.98E-01 | 1.10 | 1.20 | Enterococcus_hirae_96                  | Bacteria_Firmicutes_99_Bacilli_99_Lactobacillales_95_Enterococcaceae_78_Vagococcus_38                           |
| OTU_3559  | 7.62E-01 | 8.36E-01 | 7.35E-01 | 1.11 | 0.95 | Enterocloster_clostridioformis_97      | Bacteria_Firmicutes_Clostridia_Clostridiales_Lachnospiraceae_Enterocloster_87                                   |
| OTU_3707  | 8.82E-01 | 8.09E-01 | 3.59E-02 | 1.02 | 0.35 | Veillonella_dispar_100                 | Bacteria_Firmicutes_78_Negativicutes_78_Selenomonadales_30_Sporomusaceae_30_Anaerosinus_21                      |
| OTU_4725  | 8.97E-01 | 7.55E-01 | 1.64E-02 | 1.61 | 0.30 | Listeria_grayi_91                      | Bacteria_Firmicutes_Bacilli_53_Lactobacillales_45_Carnobacteriaceae_40_Isobaculum_30                            |
| OTU_647   | 9.87E-01 | 6.04E-01 | 5.05E-02 | 1.27 | 0.09 | Limosilactobacillus_secaliphilus_97    | Bacteria_Firmicutes_Bacilli_Lactobacillales_Lactobacillaceae_Limosilactobacillus_56                             |
| OTU_7426  | 7.07E-01 | 7.70E-01 | 2.58E-01 | 0.75 | 1.19 | Eubacterium_callanderi_98              | Bacteria_Firmicutes_83_Clostridia_83_Clostridiales_83_Eubacteriaceae_81_Pseudoramibacter_49                     |
| OTU_927   | 9.78E-01 | 6.14E-01 | 1.73E-02 | 0.51 | 1.85 | Eubacterium_callanderi_95              | Bacteria_Firmicutes_Clostridia_Clostridiales_Eubacteriaceae_Eubacterium_41                                      |
| OTU_92918 | 7.91E-01 | 9.37E-01 | 1.21E-02 | 2.72 | 0.14 | Bacteroides_xylanisolvens_98           | Bacteria_Bacteroidetes_Bacteroidia_Bacteroidales_Bacteroidaceae_Bacteroides_100                                 |
| OTU_970   | 9.99E-01 | 7.80E-01 | 8.85E-02 | 0.47 | 0.97 | Gibbsiella_greigii_90                  | Bacteria_Proteobacteria_Gammaproteobacteria_50_Enterobacterales_50_Enterobacteriaceae_50_Pseudescherichia_42    |
| OTU_9959  | 7.19E-01 | 6.04E-01 | 1.80E-01 | 0.89 | 0.43 | Collinsella_aerofaciens_97             | Bacteria_Actinobacteria_Coriobacteriia_Coriobacteriales_Coriobacteriaceae_Collinsella_100                       |
| OTU_13073 | 9.87E-01 | 9.61E-01 | 2.43E-03 | 2.30 | 0.49 | Clostridium_perfringens_97             | Bacteria_Firmicutes_74_Clostridia_74_Clostridiales_74_Clostridiaceae_1_74_Sarcina_30                            |
| OTU_1429  | 9.65E-01 | 8.41E-01 | 2.45E-02 | 2.31 | 0.37 | Clostridiales_perfringens_96           | Bacteria_Firmicutes_Clostridia_Clostridiales_Clostridiaceae_1_63_Sarcina_34                                     |
| OTU_15169 | 9.60E-01 | 8.68E-01 | 2.49E-01 | 0.69 | 1.18 | Lachnoclostridium_pacaense_96          | Bacteria_Firmicutes_Clostridia_Clostridiales_Lachnospiraceae_Enterocloster_47                                   |
| OTU_1872  | 7.07E-01 | 6.65E-01 | 4.92E-03 | 2.06 | 0.12 | Bacteroides_uniformis_96               | Bacteria_Bacteroidetes_99_Bacteroidia_99_Bacteroidales_99_Bacteroidaceae_92_Mediterranea_71                     |
| OTU_1911  | 9.46E-01 | 8.51E-01 | 9.43E-01 | 0.95 | 0.98 | Enterococcus_devriesei_89              | Bacteria_Firmicutes_97_Bacilli_52_Lactobacillales_44_Carnobacteriaceae_34_Catelicoccus_18                       |
| OTU_33595 | 1.00E+00 | 9.74E-01 | 8.35E-03 | 1.60 | 0.65 | Bacteroides_acidifaciens_94            | Bacteria_Bacteroidetes_99_Bacteroidia_99_Bacteroidales_99_Bacteroidaceae_99_Bacteroides_93                      |
| OTU_3459  | 7.73E-01 | 6.83E-01 | 1.95E-01 | 1.27 | 0.60 | Fusobacterium_equinum_91               | Bacteria_Fusobacteria_96_Fusobacteriia_96_Fusobacteriales_96_Fusobacteriaceae_85_Cetobacterium_44               |
| OTU_4652  | 7.91E-01 | 4.60E-01 | 1.83E-02 | 1.72 | 0.58 | Bacteroides_uniformis_96               | Bacteria_Bacteroidetes_Bacteroidia_Bacteroidales_Bacteroidaceae_Bacteroides_100                                 |
| OTU_49888 | 7.07E-01 | 6.47E-01 | 1.95E-01 | 0.84 | 1.32 | Clostridium_symbiosum_96               | Bacteria_Firmicutes_Clostridia_Clostridiales_Lachnospiraceae_Clostridium_XIVa_63                                |
| OTU_5027  | 7.91E-01 | 6.04E-01 | 4.12E-02 | 0.64 | 1.28 | Lachnoclostridium_pacaense_92          | Bacteria_Firmicutes_Clostridia_96_Clostridiales_96_Lachnospiraceae_96_Schaefferella_23                          |
| OTU_5739  | 8.82E-01 | 9.80E-01 | 9.40E-02 | 1.40 | 0.79 | Peptoniphilus_tyrrrelliae_92           | Bacteria_Firmicutes_Clostridia_Clostridiales_Lachnospiraceae_58_Falcatimonas_17                                 |
| OTU_14985 | 9.60E-01 | 8.85E-01 | 3.89E-01 | 1.08 | 1.37 | Bacteroides_faecis_96                  | Bacteria_Bacteroidetes_Bacteroidia_Bacteroidales_Bacteroidaceae_Bacteroides_100                                 |
| OTU_16074 | 9.75E-01 | 6.57E-01 | 3.46E-01 | 0.91 | 1.23 | Pseudescherichia_vulneris_95           | Bacteria_Proteobacteria_Gammaproteobacteria_Enterobacterales_Enterobacteriaceae_Pseudescherichia_58             |
| OTU_2165  | 7.07E-01 | 8.14E-01 | 2.67E-01 | 1.55 | 1.09 | Roseburia_inulinivorans_97             | Bacteria_Firmicutes_Clostridia_Clostridiales_Lachnospiraceae_Roseburia_83                                       |
| OTU_2324  | 9.59E-01 | 7.87E-01 | 7.57E-03 | 0.23 | 1.30 | Phocaeicola_coprophilus_99             | Bacteria_Bacteroidetes_99_Bacteroidia_99_Bacteroidales_99_Bacteroidaceae_97_Phocaeicola_72                      |
| OTU_411   | 7.07E-01 | 6.04E-01 | 3.75E-01 | 2.07 | 0.40 | Intestinimonas_butyrificiproducens_97  | Bacteria_Firmicutes_Clostridia_Clostridiales_Ruminococcaceae_Intestinimonas_100                                 |
| OTU_4401  | 7.60E-01 | 6.04E-01 | 2.01E-01 | 1.12 | 0.57 | Kineothrix_alysoides_93                | Bacteria_Firmicutes_99_Clostridia_99_Clostridiales_99_Lachnospiraceae_99_Clostridium_XIVa_40                    |
| OTU_4547  | 9.72E-01 | 7.34E-01 | 1.97E-01 | 1.71 | 0.72 | Enterocloster_clostridioformis_94      | Bacteria_Firmicutes_Clostridia_Clostridiales_Lachnospiraceae_99_Coprococcus_37                                  |
| OTU_4887  | 7.57E-01 | 6.04E-01 | 3.89E-01 | 0.84 | 1.25 | Clostridium_symbiosum_95               | Bacteria_Firmicutes_Clostridia_Clostridiales_Lachnospiraceae_Coprococcus_66                                     |
| OTU_55040 | 7.46E-01 | 8.97E-01 | 1.01E-02 | 0.51 | 1.40 | Macrococcus_goetzii_87                 | Bacteria_Firmicutes_97_Bacilli_50_Lactobacillales_41_Carnobacteriaceae_39_Catelicoccus_35                       |
| OTU_7836  | 9.60E-01 | 6.76E-01 | 3.76E-01 | 0.87 | 1.18 | Escherichia_coli_92                    | Bacteria_Proteobacteria_97_Gammaproteobacteria_97_Enterobacterales_97_Enterobacteriaceae_97_Pseudescherichia_96 |
| OTU_86317 | 7.07E-01 | 9.13E-01 | 6.22E-01 | 0.54 | 0.72 | Clostridium_perfringens_96             | Bacteria_Firmicutes_Clostridia_97_Clostridiales_97_Clostridiaceae_1_97_Sarcina_17                               |
| OTU_89975 | 1.00E+00 | 8.65E-01 | 5.91E-02 | 0.39 | 1.54 | Phocaeicola_coprophilus_97             | Bacteria_Bacteroidetes_Bacteroidia_Bacteroidales_Bacteroidaceae_Phocaeicola_100                                 |
| OTU_9677  | 9.14E-01 | 6.04E-01 | 4.43E-03 | 2.02 | 0.42 | Anaerotignum_faecicola_95              | Bacteria_Firmicutes_Clostridia_Clostridiales_Lachnospiraceae_94_Anaerotignum_92                                 |
| OTU_1203  | 9.38E-01 | 7.49E-01 | 8.00E-02 | 0.40 | 0.12 | Phocaeicola_vulgatus_100               | Bacteria_Bacteroidetes_Bacteroidia_Bacteroidales_Bacteroidaceae_Phocaeicola_80                                  |
| OTU_12151 | 7.07E-01 | 6.83E-01 | 5.73E-01 | 0.42 | 0.29 | Bacteroides_stercoris_96               | Bacteria_Bacteroidetes_Bacteroidia_Bacteroidales_Bacteroidaceae_Bacteroides_69                                  |
| OTU_1262  | 7.46E-01 | 6.14E-01 | 7.66E-02 | 2.09 | 0.27 | Prevotella_copri_96                    | Bacteria_Bacteroidetes_Bacteroidia_Bacteroidales_Prevotellaceae_96_Prevotella_96                                |
| OTU_1538  | NA       | 9.54E-01 | 6.52E-02 | 0.00 | 1.12 | Methylophilus_methylotrophus_95        | Bacteria_Proteobacteria_Betaproteobacteria_Nitrosomonadales_81_Methylophilaceae_72_Methylophilus_33             |
| OTU_17031 | 8.74E-01 | 9.94E-01 | 1.01E-02 | 0.73 | 1.66 | Blautia_faecicola_91                   | Bacteria_Firmicutes_Clostridia_61_Clostridiales_61_Lachnospiraceae_61_Lachnobacterium_8                         |
| OTU_1749  | 9.87E-01 | 6.04E-01 | 1.44E-01 | 0.87 | 1.84 | Paraclostridium_bifermentans_98        | Bacteria_Firmicutes_Clostridia_72_Clostridiales_72_Peptostreptococcaceae_72_Paraclostridium_72                  |
| OTU_2307  | 7.91E-01 | 6.56E-01 | 5.02E-01 | 0.93 | 1.20 | Enterocloster_citroniae_98             | Bacteria_Firmicutes_Clostridia_Clostridiales_Lachnospiraceae_Enterocloster_67                                   |
| OTU_2335  | 1.00E+00 | 6.63E-01 | 3.24E-02 | 2.35 | 0.35 | Ligilactobacillus_apodemi_96           | Bacteria_Firmicutes_Bacilli_Lactobacillales_Enterococcaceae_49_Melissococcus_24                                 |
| OTU_2561  | 8.60E-01 | 6.04E-01 | 8.29E-01 | 1.07 | 1.24 | Dorea_longicatena_97                   | Bacteria_Firmicutes_Clostridia_Clostridiales_Lachnospiraceae_Dorea_100                                          |
| OTU_34528 | 7.93E-01 | 9.06E-01 | 6.51E-01 | 0.89 | 1.07 | Coprococcus_comes_97                   | Bacteria_Firmicutes_Clostridia_Clostridiales_Lachnospiraceae_Coprococcus_65                                     |
| OTU_38349 | 8.16E-01 | 7.31E-01 | 1.19E-02 | 1.67 | 0.44 | Bacteroides_uniformis_97               | Bacteria_Bacteroidetes_Bacteroidia_Bacteroidales_Bacteroidaceae_Bacteroides_100                                 |
| OTU_4780  | 9.54E-01 | 6.04E-01 | 6.75E-04 | 1.56 | 0.20 | Parabacteroides_distasonis_97          | Bacteria_Firmicutes_51_Clostridia_51_Clostridiales_51_Lachnospiraceae_51_Catonella_26                           |
| OTU_6086  | 7.57E-01 | 6.06E-01 | 6.96E-01 | 1.45 | 1.05 | Roseburia_intestinalis_99              | Bacteria_Firmicutes_Clostridia_Clostridiales_Lachnospiraceae_Roseburia_100                                      |
| OTU_7715  | 9.97E-01 | 5.09E-01 | 7.87E-01 | 0.98 | 1.07 | Enterocloster_clostridioformis_96      | Bacteria_Firmicutes_79_Clostridia_79_Clostridiales_79_Lachnospiraceae_79_Enterocloster_37                       |
| OTU_8357  | 7.07E-01 | 6.04E-01 | 1.48E-01 | 0.77 | 1.61 | Faecalibacterium_prausnitzii_94        | Bacteria_Firmicutes_Clostridia_Clostridiales_Ruminococcaceae_Faecalibacterium_69                                |
| OTU_911   | 1.00E+00 | 6.04E-01 | 3.49E-02 | 1.76 | 0.41 | Phascolarctobacterium_succinatutens_98 | Bacteria_Firmicutes_Negativicutes_99_Acidaminococcales_99_Acidaminococcaceae_99_Phascolarctobacterium_99        |



|            |          |          |          |      |      |                                     |                                                                                                                 |
|------------|----------|----------|----------|------|------|-------------------------------------|-----------------------------------------------------------------------------------------------------------------|
| OTU_919    | 8.16E-01 | 8.11E-01 | 4.18E-03 | 0.27 | 2.27 | Phascolarctobacterium_faecium_95    | Bacteria_Firmicutes_Negativicutes_Acidaminococcales_Acidaminococcaceae_Phascolarctobacterium_100                |
| OTU_947    | 7.07E-01 | 6.04E-01 | 4.18E-01 | 0.63 | 0.23 | Streptococcus_salivarius_97         | Bacteria_Firmicutes_Bacilli_Lactobacillales_Streptococcaceae_99_Streptococcus_99                                |
| OTU_1007   | 7.07E-01 | 8.83E-01 | 4.80E-02 | 1.90 | 0.14 | Fusobacterium_mortiferum_95         | Bacteria_Fusobacteria_86_Fusobacteriia_86_Fusobacteriales_86_Fusobacteriaceae_84_Cetobacterium_58               |
| OTU_10132  | 9.06E-01 | 9.32E-01 | 9.37E-01 | 1.00 | 1.03 | Enterococcus_thailandicus_96        | Bacteria_Firmicutes_Bacilli_99_Lactobacillales_98_Carnobacteriaceae_45_Isobaculum_33                            |
| OTU_1016   | 7.07E-01 | 8.17E-01 | 1.65E-01 | 0.31 | 2.11 | Coprococcus_comes_94                | Bacteria_Firmicutes_Clostridia_Clostridiales_Lachnospiraceae_Bariatricus_67                                     |
| OTU_112248 | 9.84E-01 | 8.73E-01 | 7.39E-03 | 0.32 | 2.11 | Bacteroides_kribbi_97               | Bacteria_Bacteroidetes_Bacteroidia_Bacteroidales_Bacteroidaceae_Bacteroides_100                                 |
| OTU_11288  | 7.14E-01 | 8.10E-01 | 3.07E-03 | 2.17 | 0.22 | Bacteroides_uniformis_97            | Bacteria_Bacteroidetes_Bacteroidia_Bacteroidales_Bacteroidaceae_Bacteroides_99                                  |
| OTU_11368  | 9.59E-01 | 9.09E-01 | 8.75E-02 | 1.06 | 0.36 | Bacteroides_faecis_95               | Bacteria_Bacteroidetes_Bacteroidia_Bacteroidales_Bacteroidaceae_Bacteroides_76                                  |
| OTU_12654  | 8.17E-01 | 8.48E-01 | 1.15E-03 | 1.99 | 0.17 | Bacteroides_caecimuris_95           | Bacteria_Bacteroidetes_Bacteroidia_Bacteroidales_Bacteroidaceae_Bacteroides_86                                  |
| OTU_2123   | 7.07E-01 | 7.40E-01 | 1.63E-02 | 0.56 | 1.74 | Veillonella_tobetsuensis_92         | Bacteria_Firmicutes_Clostridia_56_Clostridiales_56_Lachnospiraceae_56_Hungatella_54                             |
| OTU_2202   | 9.16E-01 | 6.16E-01 | 1.22E-03 | 1.36 | 0.07 | Bacteroides_timonensis_93           | Bacteria_Bacteroidetes_Bacteroidia_Bacteroidales_Bacteroidaceae_77_Bacteroides_75                               |
| OTU_2479   | 1.00E+00 | 9.02E-01 | 2.03E-02 | 1.83 | 0.86 | Clostridium_symbiosum_98            | Bacteria_Firmicutes_Clostridia_Clostridiales_Lachnospiraceae_Clostridium_XIVa_66                                |
| OTU_24940  | 8.25E-01 | 8.73E-01 | 9.89E-02 | 1.27 | 0.74 | Clostridium_symbiosum_95            | Bacteria_Firmicutes_Clostridia_Clostridiales_Lachnospiraceae_Clostridium_XIVa_67                                |
| OTU_3928   | 9.38E-01 | 4.60E-01 | 2.26E-01 | 0.97 | 1.56 | Paraclostridium_benzoelyticum_96    | Bacteria_Firmicutes_Clostridia_97_Clostridiales_97_Peptostreptococcaceae_97_Paraclostridium_90                  |
| OTU_51274  | 8.23E-01 | 9.14E-01 | 9.20E-03 | 0.36 | 1.49 | Shigella_dysenteriae_95             | Bacteria_Proteobacteria_Gammaproteobacteria_Enterobacterales_Enterobacteriaceae_Pseudescherichia_66             |
| OTU_67151  | 1.00E+00 | 8.51E-01 | 1.61E-02 | 2.08 | 0.38 | Pseudescherichia_vulneris_90        | Bacteria_Proteobacteria_Betaproteobacteria_67_Burkholderiales_65_Sutterellaceae_65_Sutterella_65                |
| OTU_67762  | 7.07E-01 | 6.44E-01 | 4.62E-01 | 1.22 | 0.51 | Enterobacter_hormaechei_99          | Bacteria_Proteobacteria_Gammaproteobacteria_Enterobacterales_Enterobacteriaceae_85_Enterobacter_35              |
| OTU_696    | 8.54E-01 | 9.89E-01 | 4.18E-01 | 0.37 | 0.16 | Megasphaera_elsdenii_96             | Bacteria_Firmicutes_Negativicutes_Veillonellales_Veillonellaceae_Megasphaera_100                                |
| OTU_7337   | 9.87E-01 | 6.04E-01 | 3.75E-01 | 1.03 | 1.39 | Hungatella_hathewayi_91             | Bacteria_Firmicutes_Clostridia_Clostridiales_Lachnospiraceae_90_Hungatella_84                                   |
| OTU_838    | 7.07E-01 | 9.69E-01 | 1.15E-03 | 1.76 | 0.28 | Erysipelatoclostridium_ramosum_92   | Bacteria_Firmicutes_Erysipelotrichia_Erysipelotrichales_Erysipelatoclostridiaceae_Erysipelatoclostridium_100    |
| OTU_9010   | 9.38E-01 | 7.02E-01 | 6.82E-02 | 0.87 | 0.28 | Ruminococcus_lactaris_99            | Bacteria_Firmicutes_Clostridia_Clostridiales_Lachnospiraceae_Ruminococcus2_85                                   |
| OTU_10149  | 7.10E-01 | 6.04E-01 | 3.09E-01 | 1.50 | 0.27 | Veillonella_rogosae_97              | Bacteria_Firmicutes_Negativicutes_Veillonellales_Veillonellaceae_Veillonella_100                                |
| OTU_1029   | 7.50E-01 | 6.24E-01 | 5.00E-02 | 1.73 | 0.28 | Cronobacter_turicensis_91           | Bacteria_Proteobacteria_93_Gammaproteobacteria_93_Enterobacterales_93_Enterobacteriaceae_93_Pseudescherichia_89 |
| OTU_118519 | NA       | 6.76E-01 | 2.30E-02 | 0.00 | 1.57 | Pseudescherichia_vulneris_97        | Bacteria_Proteobacteria_Gammaproteobacteria_Enterobacterales_Enterobacteriaceae_Escherichia/Shigella_63         |
| OTU_130282 | NA       | 6.04E-01 | 3.74E-02 | 0.00 | 2.57 | Bacteroides_kribbi_97               | Bacteria_Bacteroidetes_Bacteroidia_Bacteroidales_Bacteroidaceae_Bacteroides_100                                 |
| OTU_1462   | 7.57E-01 | 6.04E-01 | 3.66E-01 | 0.45 | 1.40 | Clostridium_polysaccharolyticum_92  | Bacteria_Firmicutes_Clostridia_Clostridiales_Ruminococcaceae_58_Flintibacter_52                                 |
| OTU_15791  | 9.37E-01 | 7.01E-01 | 1.99E-02 | 2.08 | 0.39 | Bacteroides_xylanisolvans_95        | Bacteria_Bacteroidetes_Bacteroidia_Bacteroidales_Bacteroidaceae_Bacteroides_66                                  |
| OTU_17847  | 7.07E-01 | 6.57E-01 | 7.36E-01 | 1.17 | 1.03 | Pseudescherichia_vulneris_88        | Bacteria_Proteobacteria_99_Gammaproteobacteria_99_Enterobacterales_99_Enterobacteriaceae_99_Pseudescherichia_97 |
| OTU_2987   | 7.07E-01 | 8.54E-01 | 9.41E-01 | 1.13 | 1.17 | Bacteroides_ovatus_97               | Bacteria_Bacteroidetes_Bacteroidia_Bacteroidales_Bacteroidaceae_Bacteroides_100                                 |
| OTU_3020   | 7.07E-01 | 8.68E-01 | 4.11E-02 | 1.80 | 0.50 | Coprococcus_comes_96                | Bacteria_Firmicutes_Clostridia_Clostridiales_Lachnospiraceae_Coprococcus_64                                     |
| OTU_3031   | 8.67E-01 | 7.36E-01 | 3.27E-01 | 0.75 | 1.29 | Enterococcus_hirae_92               | Bacteria_Firmicutes_99_Clostridia_59_Clostridiales_59_Peptostreptococcaceae_58_Paraclostridium_55               |
| OTU_35803  | 7.75E-01 | 6.04E-01 | 6.93E-02 | 0.49 | 0.95 | Enterococcus_faecalis_98            | Bacteria_Firmicutes_Bacilli_Lactobacillales_Enterococcaceae_99_Enterococcus_75                                  |
| OTU_395    | NA       | 9.34E-01 | 1.31E-01 | 0.00 | 1.69 | Azospirillum_lipoferum_98           | Bacteria_Proteobacteria_Alphaproteobacteria_Rhodospirillales_Azospirillaceae_Azospirillum_100                   |
| OTU_44830  | 8.06E-01 | 6.13E-01 | 1.14E-01 | 1.94 | 0.37 | Veillonella_tobetsuensis_97         | Bacteria_Firmicutes_Negativicutes_Veillonellales_Veillonellaceae_Veillonella_100                                |
| OTU_4699   | 9.14E-01 | 6.43E-01 | 5.11E-01 | 1.20 | 0.96 | Bacteroides_cellulosilyticus_87     | Bacteria_Firmicutes_55_Clostridia_55_Clostridiales_55_Lachnospiraceae_54_Merdimonas_20                          |
| OTU_57997  | 9.92E-01 | 6.14E-01 | 1.22E-01 | 0.50 | 1.02 | Enterococcus_faecalis_98            | Bacteria_Firmicutes_Bacilli_Lactobacillales_Enterococcaceae_95_Enterococcus_60                                  |
| OTU_63171  | 8.25E-01 | 8.14E-01 | 8.60E-01 | 0.29 | 0.25 | Phocaeicola_coprophilus_96          | Bacteria_Bacteroidetes_Bacteroidia_Bacteroidales_Bacteroidaceae_Phocaeicola_100                                 |
| OTU_7577   | 8.99E-01 | 9.73E-01 | 6.15E-01 | 1.04 | 1.25 | Enterocloster_asparagiformis_96     | Bacteria_Firmicutes_Clostridia_Clostridiales_Lachnospiraceae_99_Enterocloster_87                                |
| OTU_77758  | 7.07E-01 | 9.13E-01 | 1.74E-02 | 2.50 | 0.07 | Bacteroides_stercoris_97            | Bacteria_Bacteroidetes_Bacteroidia_Bacteroidales_Bacteroidaceae_Bacteroides_100                                 |
| OTU_1699   | 9.04E-01 | 6.04E-01 | 6.60E-01 | 1.04 | 1.26 | Murimonas_intestini_91              | Bacteria_Firmicutes_Clostridia_Clostridiales_Ruminococcaceae_95_Dysosmobacter_95                                |
| OTU_1764   | 9.14E-01 | 6.73E-01 | 1.37E-02 | 2.23 | 0.54 | Bacteroides_ovatus_97               | Bacteria_Bacteroidetes_Bacteroidia_Bacteroidales_Bacteroidaceae_Bacteroides_100                                 |
| OTU_2690   | 9.92E-01 | 7.79E-01 | 1.46E-02 | 1.90 | 0.55 | Clostridium_tarantellae_92          | Bacteria_Firmicutes_Clostridia_Clostridiales_Clostridiaceae_1_67_Anaerobacter_23                                |
| OTU_3367   | 7.07E-01 | 8.28E-01 | 4.87E-02 | 2.12 | 0.55 | Bacteroides_xylanisolvans_98        | Bacteria_Bacteroidetes_Bacteroidia_Bacteroidales_Bacteroidaceae_Bacteroides_100                                 |
| OTU_3911   | 8.45E-01 | 6.04E-01 | 2.43E-01 | 0.56 | 1.23 | Parabacteroides_chongii_96          | Bacteria_Bacteroidetes_Bacteroidia_Bacteroidales_Porphyromonadaceae_99_Parabacteroides_99                       |
| OTU_396    | NA       | 6.61E-01 | 9.74E-02 | 0.00 | 1.75 | Aquimonas_voraii_97                 | Bacteria_Proteobacteria_Gammaproteobacteria_Xanthomonadales_99_Rhodanobacteraceae_84_Aquimonas_84               |
| OTU_46588  | 7.91E-01 | 6.04E-01 | 1.82E-03 | 2.50 | 0.07 | Bacteroides_finegoldii_97           | Bacteria_Bacteroidetes_Bacteroidia_Bacteroidales_Bacteroidaceae_Bacteroides_100                                 |
| OTU_48863  | 7.07E-01 | 6.72E-01 | 2.35E-02 | 1.13 | 0.09 | Veillonella_atypica_97              | Bacteria_Firmicutes_Negativicutes_Veillonellales_Veillonellaceae_Veillonella_100                                |
| OTU_6084   | 7.94E-01 | 7.83E-01 | 4.66E-01 | 1.12 | 1.44 | Veillonella_dispar_95               | Bacteria_Firmicutes_Negativicutes_Veillonellales_94_Veillonellaceae_94_Veillonella_94                           |
| OTU_71377  | 7.07E-01 | 7.91E-01 | 4.67E-02 | 1.19 | 0.35 | Bacteroides_xylanisolvans_95        | Bacteria_Bacteroidetes_Bacteroidia_Bacteroidales_Bacteroidaceae_Phocaeicola_98                                  |
| OTU_8514   | 8.85E-01 | 6.04E-01 | 9.65E-01 | 1.13 | 1.15 | Acidaminococcus_fermentans_93       | Bacteria_Firmicutes_Negativicutes_95_Acidaminococcales_92_Acidaminococcaceae_92_Acidaminococcus_92              |
| OTU_892    | 9.80E-01 | 6.04E-01 | 1.66E-01 | 2.02 | 0.66 | Pseudescherichia_vulneris_90        | Bacteria_Proteobacteria_42_Gammaproteobacteria_42_Enterobacterales_42_Enterobacteriaceae_42_Pseudescherichia_30 |
| OTU_9288   | 7.07E-01 | 6.04E-01 | 5.42E-01 | 1.00 | 0.68 | Cronobacter_dublinensis_98          | Bacteria_Proteobacteria_Gammaproteobacteria_Enterobacterales_Enterobacteriaceae_Cronobacter_54                  |
| OTU_980    | 7.07E-01 | 6.05E-01 | 2.27E-01 | 1.34 | 0.38 | Oscillibacter_valericigenes_95      | Bacteria_Firmicutes_Clostridia_Clostridiales_Ruminococcaceae_Oscillibacter_98                                   |
| OTU_1019   | 7.57E-01 | 6.63E-01 | 4.67E-02 | 0.33 | 2.16 | Paraclostridium_bifementans_100     | Bacteria_Firmicutes_94_Clostridia_94_Clostridiales_94_Peptostreptococcaceae_94_Paraclostridium_92               |
| OTU_107861 | 7.07E-01 | NA       | 3.17E-01 | 2.24 | 0.00 | Veillonella_rogosae_98              | Bacteria_Firmicutes_Negativicutes_Veillonellales_Veillonellaceae_Veillonella_100                                |
| OTU_1442   | 7.07E-01 | 7.88E-01 | 3.45E-02 | 1.95 | 0.59 | Roseburia_inulinivorans_97          | Bacteria_Firmicutes_Clostridia_Clostridiales_Lachnospiraceae_Roseburia_99                                       |
| OTU_15094  | 7.07E-01 | 6.10E-01 | 1.64E-01 | 0.52 | 0.23 | Bifidobacterium_callitrichidarum_93 | Bacteria_Actinobacteria_86_Actinobacteria_86_Bifidobacteriales_86_Bifidobacteriaceae_86_Bifidobacterium_53      |
| OTU_1931   | 9.87E-01 | 6.04E-01 | 2.54E-01 | 1.54 | 0.85 | Bacteroides_fragilis_99             | Bacteria_Bacteroidetes_99_Bacteroidia_97_Bacteroidales_97_Bacteroidaceae_90_Bacteroides_46                      |
| OTU_1951   | 7.07E-01 | 6.05E-01 | 2.43E-01 | 0.24 | 0.61 | Clostridium_tepidum_98              | Bacteria_Firmicutes_Clostridia_81_Clostridiales_81_Clostridiaceae_1_81_Haloimpatiens_27                         |
| OTU_27653  | 7.57E-01 | 8.89E-01 | 1.06E-01 | 1.73 | 0.76 | Prevotella_histicola_92             | Bacteria_Bacteroidetes_Bacteroidia_Bacteroidales_Prevotellaceae_Prevotella_99                                   |
| OTU_31961  | 8.97E-01 | 6.04E-01 | 3.52E-04 | 1.71 | 0.45 | Bacteroides_thetaiotaomicron_95     | Bacteria_Bacteroidetes_Bacteroidia_Bacteroidales_Bacteroidaceae_Bacteroides_100                                 |
| OTU_34234  | 7.73E-01 | 9.51E-01 | 2.01E-03 | 1.83 | 0.17 | Streptococcus_gordonii_98           | Bacteria_Firmicutes_Bacilli_Lactobacillales_Streptococcaceae_Streptococcus_99                                   |
| OTU_36311  | 9.14E-01 | 6.04E-01 | 3.51E-01 | 0.55 | 0.92 | Enterococcus_faecalis_98            | Bacteria_Firmicutes_Bacilli_Lactobacillales_Enterococcaceae_94_Enterococcus_74                                  |
| OTU_428    | 9.59E-01 | 6.04E-01 | 8.58E-01 | 0.88 | 0.76 | Peptoniphilus_lacrimalis_100        | Bacteria_Firmicutes_Clostridia_Clostridiales_Peptoniphilaceae_Peptoniphilus_100                                 |
| OTU_4827   | 9.67E-01 | 6.39E-01 | 5.78E-02 | 0.54 | 1.66 | Sellimonas_intestinalis_97          | Bacteria_Firmicutes_Clostridia_Clostridiales_Lachnospiraceae_Sellimonas_100                                     |
| OTU_67600  | 1.00E+00 | 8.94E-01 | 4.65E-03 | 1.62 | 0.21 | Streptococcus_mitis_98              | Bacteria_Firmicutes_Bacilli_Lactobacillales_Streptococcaceae_99_Streptococcus_99                                |
| OTU_684    | 7.07E-01 | 6.04E-01 | 4.30E-02 | 2.48 | 0.09 | Clostridium_quinii_91               | Bacteria_Proteobacteria_47_Gammaproteobacteria_47_Enterobacterales_46_Enterobacteriaceae_46_Pseudescherichia_43 |

|            |          |          |          |      |      |                                    |                                                                                                                 |
|------------|----------|----------|----------|------|------|------------------------------------|-----------------------------------------------------------------------------------------------------------------|
| OTU_7311   | 7.57E-01 | 8.28E-01 | 8.12E-01 | 0.88 | 0.80 | Pseudescherichia_vulneris_89       | Bacteria_Firmicutes_79_Clostridia_79_Clostridiales_79_Lachnospiraceae_79_Enterocloster_33                       |
| OTU_8067   | 8.60E-01 | 8.37E-01 | 6.65E-02 | 0.96 | 1.73 | Bacteroides_kribbi_96              | Bacteria_Bacteroidetes_Bacteroidia_Bacteroidales_Bacteroidaceae_Bacteroides_100                                 |
| OTU_81088  | 7.07E-01 | 8.37E-01 | 7.37E-02 | 2.57 | 0.14 | Bacteroides_stercoris_97           | Bacteria_Bacteroidetes_Bacteroidia_Bacteroidales_Bacteroidaceae_Bacteroides_99                                  |
| OTU_10347  | 9.64E-01 | 7.29E-01 | 2.92E-04 | 1.88 | 0.38 | Bacteroides_uniformis_90           | Bacteria_Bacteroidetes_79_Bacteroidia_79_Bacteroidales_79_Bacteroidaceae_78_Phocaeicola_25                      |
| OTU_11474  | 9.05E-01 | 6.04E-01 | 9.29E-01 | 1.11 | 1.06 | Enterocloster_citroniae_97         | Bacteria_Firmicutes_Clostridia_Clostridiales_Lachnospiraceae_Enterocloster_69                                   |
| OTU_12641  | 7.07E-01 | 6.04E-01 | 1.09E-05 | 2.03 | 0.38 | Bacteroides_xylanisolvens_98       | Bacteria_Bacteroidetes_Bacteroidia_Bacteroidales_Bacteroidaceae_Bacteroides_100                                 |
| OTU_1354   | 7.07E-01 | 8.14E-01 | 2.82E-02 | 1.12 | 0.08 | Bacteroides_uniformis_97           | Bacteria_Bacteroidetes_Bacteroidia_Bacteroidales_Bacteroidaceae_Bacteroides_99                                  |
| OTU_1510   | 1.00E+00 | 9.80E-01 | 6.33E-01 | 0.08 | 0.12 | Phocaeicola_plebeius_98            | Bacteria_Bacteroidetes_99_Bacteroidia_99_Bacteroidales_99_Bacteroidaceae_99_Phocaeicola_83                      |
| OTU_1626   | 9.31E-01 | 7.02E-01 | 3.37E-01 | 0.95 | 1.33 | Enterococcus_thailandicus_94       | Bacteria_Firmicutes_Bacilli_98_Lactobacillales_96_Enterococcaceae_68_Vagococcus_28                              |
| OTU_1670   | 9.08E-01 | 8.51E-01 | 2.25E-01 | 0.17 | 0.43 | Anaerobutyricum_hallii_96          | Bacteria_Firmicutes_Clostridia_Clostridiales_Lachnospiraceae_Anaerobutyricum_78                                 |
| OTU_2287   | 9.59E-01 | 6.04E-01 | 6.29E-01 | 0.97 | 0.81 | Eggerthella_lenta_99               | Bacteria_Actinobacteria_99_Coriobacteriia_99_Eggerthellales_99_Eggerthellaceae_99_Eggerthella_99                |
| OTU_2734   | 7.07E-01 | 6.04E-01 | 2.21E-01 | 1.20 | 0.70 | Enterococcus_faecalis_90           | Bacteria_Firmicutes_99_Clostridia_61_Clostridiales_61_Clostridiaceae_1_61_Desnuesiella_31                       |
| OTU_369    | 7.07E-01 | 6.04E-01 | 6.01E-01 | 2.04 | 0.95 | Clostridium_sacharobutylicum_97    | Bacteria_Firmicutes_Clostridia_Clostridiales_Clostridiaceae_1_Clostridium_sensu_stricto_100                     |
| OTU_445    | 8.49E-01 | 9.75E-01 | 1.15E-01 | 0.41 | 0.15 | Anaerotaenia_torta_98              | Bacteria_Firmicutes_Clostridia_Clostridiales_Lachnospiraceae_Anaerotaenia_22                                    |
| OTU_4719   | 9.32E-01 | 8.78E-01 | 2.03E-02 | 1.91 | 0.42 | Bacteroides_xylanisolvens_96       | Bacteria_Bacteroidetes_Bacteroidia_Bacteroidales_Bacteroidaceae_Bacteroides_97                                  |
| OTU_4891   | 7.82E-01 | 9.66E-01 | 8.14E-01 | 0.33 | 0.38 | Dorea_formicigenans_96             | Bacteria_Firmicutes_Clostridia_Clostridiales_Lachnospiraceae_Dorea_56                                           |
| OTU_9529   | 8.25E-01 | 8.82E-01 | 8.81E-01 | 0.77 | 0.82 | Atopobacter_phocae_89              | Bacteria_Firmicutes_Bacilli_89_Lactobacillales_75_Carnobacteriaceae_73_Isobaculum_57                            |
| OTU_11346  | 9.01E-01 | 6.14E-01 | 3.49E-01 | 0.73 | 1.04 | Shigella_dysenteriae_95            | Bacteria_Proteobacteria_Gammaproteobacteria_Enterobacterales_Enterobacteriaceae_Pseudescherichia_74             |
| OTU_12867  | 8.25E-01 | 9.49E-01 | 1.10E-02 | 1.82 | 0.37 | Clostridium_perfringens_96         | Clostridia_Firmicutes_Clostridia_Clostridiales_Clostridiaceae_1_Sarcina_41                                      |
| OTU_13290  | 8.25E-01 | 6.04E-01 | 9.48E-01 | 1.08 | 1.06 | Kineothrix_allysoides_95           | Bacteria_Firmicutes_Clostridia_Clostridiales_Lachnospiraceae_99_Coproccoccus_34                                 |
| OTU_1445   | 7.07E-01 | 9.53E-01 | 9.16E-02 | 1.49 | 0.36 | Bacillus_cytotoxicus_93            | Bacteria_Firmicutes_Bacilli_83_Lactobacillales_30_Carnobacteriaceae_25_Isobaculum_24                            |
| OTU_1829   | 9.29E-01 | 6.63E-01 | 2.79E-01 | 0.90 | 1.39 | Flintibacter_butyricus_95          | Bacteria_Firmicutes_Clostridia_Clostridiales_Ruminococcaceae_Flintibacter_82                                    |
| OTU_2371   | 7.57E-01 | 9.82E-01 | 8.55E-05 | 1.74 | 0.28 | Hungatella_effluvii_92             | Bacteria_Firmicutes_Clostridia_Clostridiales_Lachnospiraceae_Clostridium_XIVa_15                                |
| OTU_3018   | 7.38E-01 | 7.24E-01 | 7.65E-01 | 0.81 | 0.92 | Lachnoclostridium_pacaense_93      | Bacteria_Firmicutes_Clostridia_Clostridiales_Lachnospiraceae_Butyrvibrio_17                                     |
| OTU_3294   | 7.07E-01 | 9.60E-01 | 4.12E-02 | 1.10 | 0.44 | Bifidobacterium_stercoris_96       | Bacteria_Actinobacteria_Actinobacteria_Bifidobacteriales_Bifidobacteriaceae_Bifidobacterium_75                  |
| OTU_4198   | 7.07E-01 | 7.73E-01 | 7.79E-02 | 2.15 | 0.40 | Roseburia_inulinivorans_99         | Bacteria_Firmicutes_94_Clostridia_94_Clostridiales_94_Lachnospiraceae_94_Roseburia_62                           |
| OTU_52443  | 7.13E-01 | 6.04E-01 | 5.52E-03 | 1.75 | 0.42 | Bacteroides_uniformis_97           | Bacteria_Bacteroidetes_Bacteroidia_Bacteroidales_Bacteroidaceae_Bacteroides_100                                 |
| OTU_681    | 8.73E-01 | 9.59E-01 | 9.65E-01 | 0.09 | 0.08 | Alistipes_senegalensis_100         | Bacteria_Bacteroidetes_Bacteroidia_Bacteroidales_Rikenellaceae_Alistipes_100                                    |
| OTU_7355   | 7.07E-01 | 6.04E-01 | 3.64E-01 | 0.80 | 1.28 | Eubacterium_callanderi_95          | Bacteria_Firmicutes_Clostridia_Clostridiales_Eubacteriaceae_Pseudoramibacter_85                                 |
| OTU_8837   | 7.07E-01 | 8.33E-01 | 8.71E-01 | 1.40 | 1.30 | Bacteroides_xylanisolvens_98       | Bacteria_Bacteroidetes_Bacteroidia_Bacteroidales_Bacteroidaceae_Bacteroides_100                                 |
| OTU_11136  | 9.38E-01 | 8.02E-01 | 9.60E-01 | 1.13 | 1.11 | Enterocloster_citroniae_97         | Bacteria_Firmicutes_Clostridia_Clostridiales_Lachnospiraceae_Enterocloster_71                                   |
| OTU_1407   | 7.07E-01 | 6.04E-01 | 3.49E-02 | 0.38 | 1.88 | Paraclostridium_benzoelyticum_98   | Bacteria_Firmicutes_Clostridia_67_Clostridiales_67_Peptostreptococcaceae_67_Paraclostridium_67                  |
| OTU_16358  | 7.20E-01 | 8.95E-01 | 2.42E-02 | 0.52 | 1.35 | Lentibacillus_juripiscarius_88     | Bacteria_Firmicutes_Bacilli_96_Lactobacillales_76_Carnobacteriaceae_63_Isobaculum_48                            |
| OTU_20314  | 7.10E-01 | NA       | 3.77E-02 | 3.28 | 0.00 | Prevotella_copri_96                | Bacteria_Bacteroidetes_Bacteroidia_Bacteroidales_Prevotellaceae_Prevotella_99                                   |
| OTU_2053   | 8.05E-01 | 9.35E-01 | 1.00E-01 | 0.58 | 0.19 | Phocaeicola_vulgatus_98            | Bacteria_Bacteroidetes_82_Bacteroidia_82_Bacteroidales_82_Bacteroidaceae_82_Phocaeicola_62                      |
| OTU_3511   | 9.92E-01 | 8.71E-01 | 1.95E-02 | 2.06 | 0.21 | Veillonella_parvula_98             | Bacteria_Firmicutes_70_Negativicutes_70_Veillonellales_56_Veillonellaceae_56_Veillonella_54                     |
| OTU_50766  | 8.89E-01 | 9.27E-01 | 1.34E-01 | 1.18 | 0.80 | Enterocloster_citroniae_97         | Bacteria_Firmicutes_Clostridia_Clostridiales_Lachnospiraceae_Enterocloster_81                                   |
| OTU_54520  | 9.87E-01 | 6.05E-01 | 7.42E-02 | 0.53 | 1.06 | Enterococcus_faecalis_98           | Bacteria_Firmicutes_Bacilli_Lactobacillales_Enterococcaceae_97_Enterococcus_62                                  |
| OTU_5533   | 8.97E-01 | 6.04E-01 | 2.82E-01 | 0.82 | 1.37 | Erysipelatoclostridium_amosum_97   | Bacteria_Firmicutes_Erysipelotrichia_Erysipelotrichales_Erysipelatoclostridiaceae_Erysipelatoclostridium_100    |
| OTU_609    | 8.32E-01 | 6.04E-01 | 1.30E-01 | 2.02 | 0.18 | Ileibacterium_valens_90            | Bacteria_Firmicutes_Erysipelotrichia_Erysipelotrichales_Erysipelotrichaceae_Allobaculum_32                      |
| OTU_63739  | 7.75E-01 | 5.62E-01 | 2.45E-02 | 1.37 | 0.45 | Clostridium_perfringens_97         | Bacteria_Firmicutes_Clostridia_99_Clostridiales_99_Clostridiaceae_1_94_Clostridium_sensu_stricto_50             |
| OTU_7232   | 8.31E-01 | 9.18E-01 | 2.34E-01 | 0.73 | 1.24 | Faecalibacterium_prausnitzii_92    | Bacteria_Firmicutes_Clostridia_Clostridiales_Ruminococcaceae_99_Faecalibacterium_62                             |
| OTU_7480   | 7.07E-01 | 7.29E-01 | 1.50E-02 | 1.44 | 0.64 | Dorea_longicatena_97               | Bacteria_Firmicutes_Clostridia_Clostridiales_Lachnospiraceae_Dorea_86                                           |
| OTU_827    | 7.12E-01 | 6.04E-01 | 8.43E-01 | 1.37 | 1.14 | Coproccoccus_comes_97              | Bacteria_Firmicutes_94_Clostridia_94_Clostridiales_94_Lachnospiraceae_94_Bariatricus_72                         |
| OTU_883    | 9.60E-01 | 6.04E-01 | 3.74E-02 | 1.78 | 0.09 | Enterococcus_hirae_90              | Bacteria_Firmicutes_Clostridia_72_Clostridiales_72_Clostridiaceae_1_72_Proteiniclasticum_38                     |
| OTU_926    | 9.08E-01 | 6.04E-01 | 1.30E-01 | 0.35 | 1.70 | Eubacterium_limosum_92             | Bacteria_Firmicutes_Clostridia_Clostridiales_Eubacteriaceae_94_Eubacterium_93                                   |
| OTU_10182  | 7.07E-01 | 4.60E-01 | 6.59E-03 | 1.83 | 0.52 | Clostridium_perfringens_89         | Bacteria_Proteobacteria_82_Gammaproteobacteria_82_Enterobacterales_81_Enterobacteriaceae_81_Pseudescherichia_76 |
| OTU_1453   | 7.07E-01 | 6.04E-01 | 1.94E-01 | 0.43 | 0.02 | Megasphaera_hexanoica_94           | Bacteria_Firmicutes_Negativicutes_Veillonellales_Veillonellaceae_Megasphaera_72                                 |
| OTU_1483   | 7.74E-01 | 6.07E-01 | 7.99E-03 | 2.25 | 0.26 | Clostridium_polysaccharolyticum_88 | Bacteria_Firmicutes_70_Clostridia_70_Clostridiales_70_Lachnospiraceae_70_Bariatricus_24                         |
| OTU_1750   | 8.90E-01 | 9.46E-01 | 5.21E-01 | 0.97 | 1.25 | Coproccoccus_comes_95              | Bacteria_Firmicutes_Clostridia_Clostridiales_Lachnospiraceae_Coproccoccus_79                                    |
| OTU_1831   | 8.85E-01 | 6.04E-01 | 3.58E-01 | 1.41 | 1.01 | Hungatella_effluvii_97             | Bacteria_Firmicutes_83_Clostridia_83_Clostridiales_83_Lachnospiraceae_83_Merdimonas_43                          |
| OTU_1885   | 9.75E-01 | 6.04E-01 | 1.46E-02 | 1.67 | 0.27 | Enterococcus_hirae_97              | Bacteria_Firmicutes_Bacilli_Lactobacillales_Enterococcaceae_91_Vagococcus_41                                    |
| OTU_3359   | 7.98E-01 | 6.14E-01 | 8.39E-01 | 1.01 | 1.09 | Enterococcus_hirae_92              | Bacteria_Firmicutes_Bacilli_Lactobacillales_Enterococcaceae_91_Melissococcus_47                                 |
| OTU_735    | NA       | 7.08E-01 | 2.03E-02 | 0.00 | 1.43 | Hypomicrobium_aestuarii_94         | Bacteria_Proteobacteria_Alphaproteobacteria_Rhizobiales_97_Xanthobacteraceae_24_Methylorhabdus_12               |
| OTU_8976   | 9.05E-01 | 8.73E-01 | 9.78E-01 | 0.97 | 0.98 | Enterococcus_faecalis_96           | Bacteria_Firmicutes_Bacilli_99_Lactobacillales_97_Carnobacteriaceae_41_Isobaculum_28                            |
| OTU_107883 | 7.07E-01 | 9.35E-01 | 3.57E-01 | 1.47 | 0.09 | Veillonella_rogosae_98             | Bacteria_Firmicutes_Negativicutes_Veillonellales_Veillonellaceae_Veillonella_100                                |
| OTU_11659  | 9.43E-01 | 8.36E-01 | 5.52E-01 | 0.67 | 0.85 | Lachnoclostridium_pacaense_98      | Bacteria_Firmicutes_Clostridia_Clostridiales_Lachnospiraceae_Clostridium_XIVa_44                                |
| OTU_13472  | 7.07E-01 | 6.90E-01 | 3.18E-01 | 0.68 | 1.03 | Enterococcus_faecalis_96           | Bacteria_Firmicutes_Bacilli_Lactobacillales_Enterococcaceae_83_Melissococcus_41                                 |
| OTU_2994   | 9.75E-01 | 9.53E-01 | 1.55E-01 | 1.35 | 0.91 | Coproccoccus_comes_100             | Bacteria_Firmicutes_Clostridia_Clostridiales_Lachnospiraceae_Coproccoccus_69                                    |
| OTU_36229  | 9.99E-01 | 6.04E-01 | 5.97E-01 | 0.67 | 0.79 | Enterococcus_faecalis_97           | Bacteria_Firmicutes_Bacilli_Lactobacillales_Enterococcaceae_92_Enterococcus_54                                  |
| OTU_4516   | 9.43E-01 | 9.62E-01 | 7.42E-01 | 1.15 | 1.28 | Enterocloster_clostridioformis_95  | Bacteria_Firmicutes_Clostridia_Clostridiales_Lachnospiraceae_Coproccoccus_37                                    |
| OTU_5204   | 7.46E-01 | 6.57E-01 | 1.14E-03 | 1.29 | 0.19 | Phocaeicola_vulgatus_88            | Bacteria_Bacteroidetes_45_Bacteroidia_45_Bacteroidales_45_Bacteroidaceae_45_Phocaeicola_41                      |
| OTU_616    | 7.07E-01 | 9.91E-01 | 2.45E-01 | 0.12 | 0.02 | Catenibacterium_mitsuokai_97       | Bacteria_Firmicutes_96_Erysipelotrichia_96_Erysipelotrichales_96_Erysipelotrichaceae_96_Catenibacterium_83      |
| OTU_7474   | 9.99E-01 | 9.94E-01 | 9.71E-01 | 0.67 | 0.68 | Phocaeicola_coprophilus_97         | Bacteria_Bacteroidetes_Bacteroidia_Bacteroidales_Bacteroidaceae_Phocaeicola_100                                 |
| OTU_9261   | 7.07E-01 | 6.04E-01 | 1.27E-02 | 1.22 | 0.47 | Bacteroides_uniformis_95           | Bacteria_Bacteroidetes_Bacteroidia_Bacteroidales_Bacteroidaceae_Bacteroides_79                                  |
| OTU_10568  | 8.88E-01 | 8.14E-01 | 2.17E-01 | 0.94 | 0.58 | Enterocloster_clostridioformis_97  | Bacteria_Firmicutes_Clostridia_Clostridiales_Lachnospiraceae_Enterocloster_54                                   |
| OTU_1204   | 7.80E-01 | 6.14E-01 | 6.02E-03 | 1.03 | 0.21 | Escherichia_coli_91                | Bacteria_Proteobacteria_97_Gammaproteobacteria_97_Enterobacterales_97_Enterobacteriaceae_97_Pseudescherichia_95 |



|            |          |          |          |      |      |                                            |                                                                                                                         |
|------------|----------|----------|----------|------|------|--------------------------------------------|-------------------------------------------------------------------------------------------------------------------------|
| OTU_1357   | 7.07E-01 | 7.31E-01 | 1.26E-01 | 1.11 | 0.02 | Fusobacterium_mortiferum_94                | Bacteria_Fusobacteria_78_Fusobacteriia_78_Fusobacteriales_78_Fusobacteriaceae_76_Cetobacterium_50                       |
| OTU_1367   | 8.49E-01 | 6.04E-01 | 4.41E-02 | 1.81 | 0.11 | Veillonella_dispar_88                      | Bacteria_Fusobacteria_95_Fusobacteriia_95_Fusobacteriales_95_Fusobacteriaceae_90_Psychrilyobacter_34                    |
| OTU_1394   | 7.74E-01 | 6.14E-01 | 2.07E-01 | 1.52 | 0.60 | Sutterella_wadsworthensis_98               | Bacteria_Proteobacteria_84_Betaproteobacteria_83_Burkholderiales_83_Sutterellaceae_83_Sutterella_82                     |
| OTU_13955  | 9.57E-01 | 9.57E-01 | 1.95E-01 | 1.21 | 0.74 | Enterocloster_citroniae_95                 | Bacteria_Firmicutes_Clostridia_Clostridiales_Lachnospiraceae_Enterocloster_86                                           |
| OTU_1451   | 7.07E-01 | 7.38E-01 | 7.49E-02 | 0.93 | 0.24 | Clostridium_perfringens_95                 | Bacteria_Firmicutes_Clostridia_Clostridiales_Clostridiaceae_1_89_Anaerobacter_32                                        |
| OTU_1883   | 7.12E-01 | 9.18E-01 | 7.83E-03 | 0.51 | 1.82 | Hungatella_hathewayi_91                    | Bacteria_Firmicutes_Negativicutes_51_Acidaminococcales_51_Acidaminococcaceae_51_Phascolartcobacterium_51                |
| OTU_21165  | 9.37E-01 | 9.18E-01 | 9.78E-02 | 1.64 | 0.86 | Roseburia_inulinivorans_97                 | Bacteria_Firmicutes_Clostridia_Clostridiales_Lachnospiraceae_Roseburia_99                                               |
| OTU_30073  | 8.06E-01 | 9.62E-01 | 6.49E-01 | 1.05 | 1.22 | Roseburia_inulinivorans_96                 | Bacteria_Firmicutes_Clostridia_Clostridiales_Lachnospiraceae_Roseburia_84                                               |
| OTU_33867  | 7.07E-01 | 6.05E-01 | 3.09E-02 | 0.63 | 1.22 | Enterococcus_faecalis_98                   | Bacteria_Firmicutes_Bacilli_Lactobacillales_Enterococcaceae_96_Enterococcus_75                                          |
| OTU_3543   | 8.94E-01 | 9.11E-01 | 2.75E-02 | 1.69 | 0.50 | Enterococcus_hirae_90                      | Bacteria_Firmicutes_89_Bacilli_89_Lactobacillales_82_Carnobacteriaceae_58_Isobaculum_51                                 |
| OTU_36013  | 7.07E-01 | 9.18E-01 | 3.54E-02 | 0.68 | 0.17 | Phocaeicola_vulgatus_97                    | Bacteria_Bacteroidetes_Bacteroidia_Bacteroidales_Bacteroidaceae_Phocaeicola_91                                          |
| OTU_3733   | 7.07E-01 | 6.04E-01 | 9.85E-01 | 0.62 | 0.63 | Bacteroides_mediterraneensis_97            | Bacteria_Bacteroidetes_Bacteroidia_Bacteroidales_Bacteroidaceae_Phocaeicola_69                                          |
| OTU_4212   | 9.56E-01 | 9.90E-01 | 3.90E-01 | 0.70 | 0.94 | Hungatella_hathewayi_88                    | Bacteria_Firmicutes_97_Bacilli_79_Lactobacillales_73_Carnobacteriaceae_67_Isobaculum_56                                 |
| OTU_748    | 7.85E-01 | 8.68E-01 | 8.23E-02 | 1.47 | 0.17 | Kineothrix_alysoides_96                    | Bacteria_Firmicutes_Clostridia_Clostridiales_Lachnospiraceae_Kineothrix_77                                              |
| OTU_1053   | 8.58E-01 | 9.70E-01 | 7.14E-01 | 0.07 | 0.05 | Bifidobacterium_callitrichidarum_99        | Bacteria_Actinobacteria_95_Actinobacteria_95_Bifidobacteriales_94_Bifidobacteriaceae_94_Neoscardovia_33                 |
| OTU_15442  | 7.07E-01 | 6.14E-01 | 1.15E-01 | 0.47 | 0.04 | Streptococcus_sinensis_98                  | Bacteria_Firmicutes_Bacilli_Lactobacillales_Streptococcaceae_Streptococcus_100                                          |
| OTU_2928   | 9.37E-01 | 9.32E-01 | 2.07E-01 | 0.86 | 0.55 | Faecalibacterium_prausnitzii_98            | Bacteria_Firmicutes_Clostridia_Clostridiales_Ruminococcaceae_Faecalibacterium_100                                       |
| OTU_3330   | 9.43E-01 | 9.25E-01 | 2.03E-02 | 0.58 | 1.63 | Enterocloster_aldenensis_96                | Bacteria_Firmicutes_Clostridia_Clostridiales_Lachnospiraceae_98_Enterocloster_84                                        |
| OTU_4180   | 9.68E-01 | 8.41E-01 | 2.46E-01 | 1.24 | 0.84 | Escherichia_albertii_87                    | Bacteria_Firmicutes_77_Clostridia_77_Clostridiales_77_Lachnospiraceae_77_Ruminococcus2_36                               |
| OTU_4489   | 7.07E-01 | 8.17E-01 | 8.16E-01 | 1.02 | 0.93 | Enterocloster_citroniae_97                 | Bacteria_Firmicutes_Clostridia_Clostridiales_Lachnospiraceae_Enterocloster_94                                           |
| OTU_4939   | NA       | 6.63E-01 | 1.35E-01 | 0.00 | 1.93 | Methyloversatilis_universalis_97           | Bacteria_Proteobacteria_Betaproteobacteria_Nitrosomonadales_68_Sterolibacteriaceae_68_Methyloversatilis_67              |
| OTU_62047  | 1.00E+00 | 9.33E-01 | 1.21E-02 | 1.78 | 0.48 | Bacteroides_xylanisolvens_98               | Bacteria_Bacteroidetes_Bacteroidia_Bacteroidales_Bacteroidaceae_Bacteroides_100                                         |
| OTU_7374   | 1.00E+00 | 6.94E-01 | 1.08E-01 | 0.36 | 0.76 | Flintibacter_butyriscus_92                 | Bacteria_Firmicutes_Clostridia_Clostridiales_Ruminococcaceae_61_Flintibacter_23                                         |
| OTU_7590   | 9.45E-01 | 8.68E-01 | 8.19E-01 | 0.55 | 0.64 | Paeniclostridium_sordellii_98              | Bacteria_Firmicutes_Clostridia_Clostridiales_Peptostreptococcaceae_Paeniclostridium_100                                 |
| OTU_80206  | 8.64E-01 | 6.04E-01 | 7.59E-02 | 0.55 | 1.23 | Enterococcus_hirae_96                      | Bacteria_Firmicutes_Bacilli_Lactobacillales_Enterococcaceae_79_Vagococcus_33                                            |
| OTU_8319   | 7.07E-01 | 7.61E-01 | 1.01E-01 | 0.45 | 0.17 | Collinsella_aerofaciens_96                 | Bacteria_Actinobacteria_Coriobacteriia_Coriobacteriales_Coriobacteriaceae_Collinsella_100                               |
| OTU_8333   | 8.06E-01 | 8.68E-01 | 4.42E-01 | 0.74 | 0.97 | Pseudescherichia_vulneris_96               | Bacteria_Proteobacteria_Gammaproteobacteria_Enterobacterales_Enterobacteriaceae_Escherichia/Shigella_81                 |
| OTU_995    | 9.92E-01 | 8.68E-01 | 1.08E-01 | 0.91 | 1.66 | Lachnotalea_glycerini_96                   | Bacteria_Firmicutes_Clostridia_Clostridiales_Lachnospiraceae_Clostridium_XIVa_70                                        |
| OTU_10124  | 7.07E-01 | 9.93E-01 | 5.10E-03 | 1.42 | 0.34 | Bifidobacterium_catenulatum_96             | Bacteria_Actinobacteria_Actinobacteria_Bifidobacteriales_Bifidobacteriaceae_Bifidobacterium_97                          |
| OTU_11158  | 7.07E-01 | 9.65E-01 | 1.46E-01 | 1.28 | 0.82 | Hungatella_hathewayi_97                    | Bacteria_Firmicutes_Clostridia_Clostridiales_Lachnospiraceae_Hungatella_45                                              |
| OTU_1141   | 7.07E-01 | 8.08E-01 | 1.42E-01 | 0.88 | 0.14 | Phocaeicola_vulgatus_98                    | Bacteria_Bacteroidetes_95_Bacteroidia_95_Bacteroidales_95_Bacteroidaceae_95_Phocaeicola_80                              |
| OTU_1185   | 9.67E-01 | 7.73E-01 | 2.84E-02 | 1.27 | 0.35 | Sutterella_massiliensis_99                 | Bacteria_Proteobacteria_Betaproteobacteria_Burkholderiales_97_Sutterellaceae_97_Sutterella_97                           |
| OTU_14631  | 9.43E-01 | 8.83E-01 | 5.71E-02 | 1.59 | 0.62 | Hungatella_effluvii_95                     | Bacteria_Firmicutes_Clostridia_Clostridiales_Lachnospiraceae_Clostridium_XIVa_73                                        |
| OTU_1496   | 8.06E-01 | 7.15E-01 | 3.74E-02 | 1.47 | 0.51 | Peptoniphilus_koenoeneniae_96              | Bacteria_Firmicutes_Clostridia_Clostridiales_Peptoniphilaceae_76_Peptoniphilus_69                                       |
| OTU_17354  | 7.12E-01 | 6.93E-01 | 8.22E-03 | 0.55 | 1.61 | Bacteroides_thetaiotaomicron_100           | Bacteria_Bacteroidetes_94_Bacteroidia_94_Bacteroidales_94_Bacteroidaceae_94_Bacteroides_88                              |
| OTU_1964   | 7.07E-01 | 7.94E-01 | 9.24E-02 | 0.50 | 1.80 | Roseburia_inulinivorans_93                 | Bacteria_Firmicutes_Clostridia_Clostridiales_Lachnospiraceae_97_Roseburia_89                                            |
| OTU_2212   | 7.80E-01 | 7.89E-01 | 5.38E-01 | 0.48 | 0.26 | Pantoea_agglomerans_97                     | Bacteria_Proteobacteria_Gammaproteobacteria_Enterobacterales_Enterobacteriaceae_Lecclercia_78                           |
| OTU_2225   | 7.07E-01 | 6.04E-01 | 7.00E-02 | 1.13 | 0.37 | Roseburia_inulinivorans_91                 | Bacteria_Firmicutes_97_Clostridia_97_Clostridiales_97_Lachnospiraceae_97_Roseburia_65                                   |
| OTU_3479   | 7.91E-01 | 7.36E-01 | 5.69E-01 | 0.93 | 1.10 | Escherichia_albertii_88                    | Bacteria_Proteobacteria_76_Gammaproteobacteria_76_Enterobacterales_76_Enterobacteriaceae_76_Pseudescherichia_76         |
| OTU_3772   | 9.66E-01 | 9.85E-01 | 8.21E-01 | 0.77 | 0.83 | Pseudescherichia_vulneris_97               | Bacteria_Proteobacteria_Gammaproteobacteria_Enterobacterales_Enterobacteriaceae_Escherichia/Shigella_90                 |
| OTU_3840   | 8.52E-01 | 6.66E-01 | 2.07E-01 | 0.93 | 0.30 | Bacteroides_faecichinchillae_96            | Bacteria_Bacteroidetes_Bacteroidia_Bacteroidales_Bacteroidaceae_98_Bacteroides_98                                       |
| OTU_3960   | 9.84E-01 | 9.17E-01 | 1.39E-01 | 0.86 | 1.37 | Coproccoccus_comes_97                      | Bacteria_Firmicutes_Clostridia_61_Clostridiales_61_Lachnospiraceae_61_Bariatricus_34                                    |
| OTU_4406   | 7.12E-01 | 6.83E-01 | 2.14E-01 | 0.68 | 0.23 | Collinsella_aerofaciens_93                 | Bacteria_Actinobacteria_Coriobacteriia_Eggerthellales_67_Eggerthellaceae_67_Slackia_67                                  |
| OTU_4948   | 9.64E-01 | 6.63E-01 | 1.12E-01 | 0.67 | 1.04 | Hungatella_hathewayi_90                    | Bacteria_Firmicutes_96_Bacilli_57_Lactobacillales_41_Carnobacteriaceae_37_Isobaculum_25                                 |
| OTU_494    | 7.46E-01 | 9.49E-01 | 6.72E-01 | 0.45 | 0.67 | Serratia_surfactantfaciens_100             | Bacteria_Proteobacteria_Gammaproteobacteria_Enterobacterales_Yersiniaceae_98_Serratia_98                                |
| OTU_496    | 7.98E-01 | NA       | 1.77E-01 | 2.95 | 0.00 | Clostridium_codeatum_91                    | Bacteria_Firmicutes_Erysipelotrichia_Erysipelotrichales_Erysipelotrichaceae_Faecalibacillus_100                         |
| OTU_52219  | 7.46E-01 | 6.23E-01 | 1.61E-02 | 0.36 | 1.06 | Enterococcus_faecalis_98                   | Bacteria_Firmicutes_Bacilli_Lactobacillales_Enterococcaceae_95_Enterococcus_67                                          |
| OTU_61137  | 7.07E-01 | 9.57E-01 | 4.96E-02 | 2.15 | 0.16 | Bacteroides_thetaiotaomicron_98            | Bacteria_Bacteroidetes_Bacteroidia_Bacteroidales_Bacteroidaceae_Bacteroides_100                                         |
| OTU_6302   | 7.82E-01 | 6.04E-01 | 1.03E-01 | 1.14 | 0.21 | Vallitalea_pronyensis_86                   | Bacteria_Firmicutes_91_Clostridia_84_Clostridiales_83_Lachnospiraceae_22_Abyssivirga_10                                 |
| OTU_10079  | 8.25E-01 | 6.72E-01 | 2.85E-02 | 1.33 | 0.36 | Faecalicatena_erotica_97                   | Bacteria_Firmicutes_Clostridia_Clostridiales_Lachnospiraceae_Faecalicatena_48                                           |
| OTU_10111  | 7.07E-01 | 9.90E-01 | 4.81E-01 | 1.07 | 0.84 | Hespellia_porcina_90                       | Bacteria_Proteobacteria_63_Gammaproteobacteria_63_Enterobacterales_63_Enterobacteriaceae_63_Pseudescherichia_57         |
| OTU_14999  | 7.12E-01 | 7.79E-01 | 2.48E-01 | 1.13 | 0.73 | Bacteroides_fragilis_96                    | Bacteria_Bacteroidetes_Bacteroidia_Bacteroidales_Bacteroidaceae_Bacteroides_100                                         |
| OTU_15516  | 9.02E-01 | 9.03E-01 | 6.73E-04 | 1.74 | 0.25 | Clostridium_carnis_93                      | Bacteria_Firmicutes_Bacilli_58_Lactobacillales_49_Carnobacteriaceae_45_Isobaculum_37                                    |
| OTU_1588   | 7.07E-01 | 6.04E-01 | 2.91E-03 | 2.19 | 0.14 | Vagococcus_martis_87                       | Bacteria_Bacteroidetes_70_Bacteroidia_70_Bacteroidales_70_Bacteroidaceae_70_Mediterranea_67                             |
| OTU_16021  | 7.33E-01 | 9.03E-01 | 1.80E-02 | 1.84 | 0.26 | Bacteroides_finegoldii_96                  | Bacteria_Bacteroidetes_Bacteroidia_Bacteroidales_Bacteroidaceae_Bacteroides_84                                          |
| OTU_1791   | 7.46E-01 | 6.04E-01 | 4.63E-02 | 1.97 | 0.58 | Mediterraneibacter_glycyrrhizinilyticus_94 | Bacteria_Firmicutes_Clostridia_Clostridiales_Lachnospiraceae_99_Mediterraneibacter_90                                   |
| OTU_2171   | 8.57E-01 | 6.19E-01 | 3.82E-03 | 1.90 | 0.09 | Escherichia_coli_89                        | Bacteria_Firmicutes_65_Negativicutes_65_Acidaminococcales_65_Acidaminococcaceae_65_Phascolartcobacterium_65             |
| OTU_3878   | 9.87E-01 | 4.60E-01 | 2.69E-01 | 0.70 | 1.17 | Erysipelatoclostridium_amosum_94           | Bacteria_Firmicutes_69_Erysipelotrichia_68_Erysipelotrichales_68_Erysipelatoclostridiaceae_67_Erysipelatoclostridium_67 |
| OTU_4860   | 7.07E-01 | 7.70E-01 | 4.11E-01 | 0.41 | 0.23 | Bifidobacterium_catenulatum_95             | Bacteria_Actinobacteria_95_Actinobacteria_95_Bifidobacteriales_94_Bifidobacteriaceae_94_Bifidobacterium_54              |
| OTU_53928  | 7.07E-01 | 6.04E-01 | 8.92E-01 | 0.60 | 0.54 | Citrobacter_braakii_98                     | Bacteria_Proteobacteria_Gammaproteobacteria_Enterobacterales_Enterobacteriaceae_97_Citrobacter_61                       |
| OTU_57958  | 8.49E-01 | 6.63E-01 | 1.94E-01 | 1.25 | 0.63 | Clostridium_tarantellae_93                 | Bacteria_Firmicutes_Clostridia_Clostridiales_Lachnospiraceae_46_Mobilitalea_10                                          |
| OTU_692    | 8.90E-01 | 8.28E-01 | 9.89E-01 | 0.19 | 0.18 | Bifidobacterium_stercoris_99               | Bacteria_Actinobacteria_87_Actinobacteria_87_Bifidobacteriales_87_Bifidobacteriaceae_87_Pseudoscardovia_44              |
| OTU_71396  | 9.38E-01 | 6.04E-01 | 6.44E-03 | 1.42 | 0.26 | Bacteroides_cacae_96                       | Bacteria_Bacteroidetes_Bacteroidia_Bacteroidales_Bacteroidaceae_Bacteroides_99                                          |
| OTU_7361   | 8.29E-01 | 6.14E-01 | 3.80E-01 | 0.83 | 1.44 | Dialister_succinatiphilus_94               | Bacteria_Firmicutes_Negativicutes_Veillonellales_95_Veillonellaceae_95_Dialister_94                                     |
| OTU_91205  | 8.94E-01 | 8.89E-01 | 6.97E-04 | 0.12 | 1.68 | Bacteroides_faecichinchillae_96            | Bacteria_Bacteroidetes_Bacteroidia_Bacteroidales_Bacteroidaceae_Bacteroides_96                                          |
| OTU_101026 | 9.46E-01 | 9.98E-01 | 9.20E-01 | 0.81 | 0.84 | Enterocloster_asparagiformis_96            | Bacteria_Firmicutes_Clostridia_Clostridiales_Lachnospiraceae_Enterocloster_34                                           |
| OTU_11582  | 7.07E-01 | 9.46E-01 | 4.62E-01 | 0.65 | 0.37 | Peptoniphilus_duerdenii_96                 | Bacteria_Firmicutes_Clostridia_Clostridiales_Peptoniphilaceae_Peptoniphilus_100                                         |

|           |          |          |          |      |      |                                        |                                                                                                                      |
|-----------|----------|----------|----------|------|------|----------------------------------------|----------------------------------------------------------------------------------------------------------------------|
| OTU_12781 | 7.46E-01 | 8.77E-01 | 1.30E-03 | 1.39 | 0.23 | Veillonella_atypica_89                 | Bacteria_Firmicutes_Clostridia_96_Clostridiales_96_Lachnospiraceae_96_Bariatricus_74                                 |
| OTU_1887  | 8.74E-01 | 6.35E-01 | 9.63E-03 | 1.55 | 0.32 | Senegalimassilia_anaerobia_93          | Bacteria_Actinobacteria_Coriobacteriia_Coriobacteriales_Coriobacteriaceae_Senegalimassilia_100                       |
| OTU_19515 | 7.93E-01 | 6.72E-01 | 3.49E-01 | 1.07 | 0.68 | Enterococcus_hirae_97                  | Bacteria_Firmicutes_Bacilli_Lactobacillales_97_Enterococcaceae_70_Enterococcus_58                                    |
| OTU_2246  | 1.00E+00 | 8.47E-01 | 8.21E-01 | 1.08 | 0.97 | Anaerotaenia_torta_89                  | Bacteria_Firmicutes_93_Clostridia_74_Clostridiales_74_Lachnospiraceae_74_Anaerotaenia_9                              |
| OTU_28061 | 8.06E-01 | 6.30E-01 | 4.00E-01 | 1.07 | 0.82 | Hespellia_porcina_89                   | Bacteria_Firmicutes_57_Clostridia_57_Clostridiales_57_Lachnospiraceae_57_Catonella_30                                |
| OTU_2921  | 7.07E-01 | 6.06E-01 | 7.47E-01 | 0.83 | 0.93 | Flavonifractor_plautii_100             | Bacteria_Firmicutes_Clostridia_Clostridiales_Ruminococcaceae_Flavonifractor_100                                      |
| OTU_3081  | 7.07E-01 | 6.04E-01 | 7.37E-01 | 0.97 | 0.79 | Coproccoccus_comes_97                  | Bacteria_Firmicutes_Clostridia_Clostridiales_Lachnospiraceae_Bariatricus_71                                          |
| OTU_500   | 9.08E-01 | 7.31E-01 | 2.19E-01 | 0.34 | 0.11 | Prevotella_stercora_97                 | Bacteria_Bacteroidetes_Bacteroidia_Bacteroidales_Prevotellaceae_Prevotella_100                                       |
| OTU_776   | 7.46E-01 | 5.09E-01 | 3.57E-01 | 0.58 | 0.12 | Streptococcus_peroris_89               | Bacteria_Firmicutes_Clostridia_91_Clostridiales_91_Lachnospiraceae_91_Merdimonas_32                                  |
| OTU_8047  | 7.57E-01 | 6.14E-01 | 7.67E-02 | 1.70 | 0.57 | Clostridium_perfringens_96             | Bacteria_Firmicutes_Clostridia_98_Clostridiales_98_Clostridiaceae_1_86_Sarcina_50                                    |
| OTU_8094  | 8.99E-01 | 6.04E-01 | 6.80E-02 | 0.56 | 1.42 | Paraclostridium_benzoelyticum_97       | Bacteria_Firmicutes_Clostridia_Clostridiales_Peptostreptococcaceae_Paraclostridium_88                                |
| OTU_825   | 9.47E-01 | 8.02E-01 | 6.95E-01 | 0.24 | 0.16 | Megasphaera_elsdenii_96                | Bacteria_Firmicutes_Negativicutes_99_Veillonellales_99_Veillonellaceae_99_Megasphaera_99                             |
| OTU_941   | 7.07E-01 | 6.04E-01 | 1.48E-01 | 0.63 | 0.19 | Peptoniphilus_grossensis_96            | Bacteria_Firmicutes_Clostridia_Clostridiales_Peptoniphilaceae_Peptoniphilus_100                                      |
| OTU_9850  | 9.73E-01 | 8.45E-01 | 3.70E-03 | 1.89 | 0.35 | Clostridium_tarantellae_96             | Bacteria_Firmicutes_Clostridia_Clostridiales_Clostridiaceae_1_81_Sarcina_46                                          |
| OTU_10199 | 7.91E-01 | 4.60E-01 | 8.23E-01 | 0.84 | 0.93 | Pseudescherichia_vulneris_97           | Bacteria_Proteobacteria_Gammaproteobacteria_Enterobacteriales_Enterobacteriaceae_Escherichia/Shigella_65             |
| OTU_1486  | 9.72E-01 | 6.04E-01 | 4.03E-03 | 1.57 | 0.07 | Phascolarctobacterium_succinatutens_91 | Bacteria_Firmicutes_Negativicutes_98_Acidaminococcales_98_Acidaminococcaceae_98_Phascolarctobacterium_98             |
| OTU_16436 | 9.46E-01 | 6.63E-01 | 2.17E-01 | 0.59 | 0.98 | Enterocloster_citroniae_95             | Bacteria_Firmicutes_Clostridia_Clostridiales_Lachnospiraceae_Enterocloster_59                                        |
| OTU_1735  | 7.07E-01 | 6.04E-01 | 4.34E-01 | 0.98 | 0.72 | Bacteroides_caccae_96                  | Bacteria_Bacteroidetes_Bacteroidia_Bacteroidales_Bacteroidaceae_Bacteroides_99                                       |
| OTU_1780  | 9.89E-01 | 6.04E-01 | 3.71E-01 | 0.95 | 1.33 | Acidaminococcus_fermentans_98          | Bacteria_Firmicutes_Negativicutes_94_Acidaminococcales_94_Acidaminococcaceae_94_Acidaminococcus_92                   |
| OTU_1793  | 9.87E-01 | 9.94E-01 | 6.65E-02 | 1.24 | 0.53 | Blautia_faecicola_93                   | Bacteria_Firmicutes_Clostridia_94_Clostridiales_94_Lachnospiraceae_94_Eisenbergiella_15                              |
| OTU_1801  | 7.07E-01 | 9.94E-01 | 7.79E-01 | 1.04 | 0.90 | Escherichia_albertii_88                | Bacteria_Proteobacteria_69_Gammaproteobacteria_69_Enterobacteriales_69_Enterobacteriaceae_69_Pseudescherichia_69     |
| OTU_2671  | 7.34E-01 | 6.72E-01 | 3.06E-02 | 1.84 | 0.19 | Pseudescherichia_vulneris_100          | Bacteria_Proteobacteria_Gammaproteobacteria_Enterobacteriales_98_Enterobacteriaceae_97_Pseudescherichia_42           |
| OTU_3026  | 7.91E-01 | 6.39E-01 | 1.27E-01 | 1.47 | 0.66 | Veillonella_parvula_98                 | Bacteria_Firmicutes_Negativicutes_99_Veillonellales_86_Veillonellaceae_86_Veillonella_86                             |
| OTU_33365 | 1.00E+00 | 9.32E-01 | 9.14E-01 | 0.91 | 0.94 | Pseudescherichia_vulneris_100          | Bacteria_Proteobacteria_Gammaproteobacteria_Enterobacteriales_Enterobacteriaceae_Pseudescherichia_43                 |
| OTU_3614  | 9.04E-01 | 7.99E-01 | 1.45E-04 | 2.10 | 0.14 | Bacteroides_xylanisolvans_96           | Bacteria_Bacteroidetes_Bacteroidia_Bacteroidales_Bacteroidaceae_97_Bacteroides_97                                    |
| OTU_3656  | 9.87E-01 | 6.10E-01 | 9.05E-03 | 2.02 | 0.07 | Fusobacterium_mortiferum_95            | Bacteria_Fusobacteria_99_Fusobacteriia_99_Fusobacteriales_99_Fusobacteriaceae_95_Cetobacterium_62                    |
| OTU_645   | 9.92E-01 | 6.04E-01 | 2.44E-01 | 1.14 | 0.06 | Liquorilactobacillus_satsumensis_97    | Bacteria_Firmicutes_Bacilli_Lactobacillales_Lactobacillaceae_Ligilactobacillus_56                                    |
| OTU_741   | 8.95E-01 | 9.91E-01 | 3.39E-02 | 1.85 | 0.05 | Falcatimonas_natans_96                 | Bacteria_Firmicutes_Clostridia_Clostridiales_Lachnospiraceae_Mediterraneibacter_36                                   |
| OTU_803   | 8.37E-01 | 6.04E-01 | 4.45E-03 | 1.93 | 0.13 | Dielma_fastidiosa_100                  | Bacteria_Firmicutes_Erysipelotrichia_Erysipelotrichales_Erysipelotrichaceae_Dielma_100                               |
| OTU_1142  | 7.87E-01 | NA       | 1.78E-01 | 0.19 | 0.00 | Mitsuokella_multacida_93               | Bacteria_Firmicutes_Negativicutes_Selenomonadales_62_Selenomonadaceae_62_Mitsuokella_62                              |
| OTU_11667 | 7.46E-01 | 9.53E-01 | 3.75E-01 | 0.12 | 0.27 | Kosakonia_cowanii_98                   | Bacteria_Proteobacteria_Gammaproteobacteria_Enterobacteriales_Enterobacteriaceae_87_Citrobacter_21                   |
| OTU_13909 | 9.41E-01 | 6.05E-01 | 5.64E-02 | 0.86 | 0.43 | Clostridium_perfringens_97             | Bacteria_Firmicutes_Clostridia_Clostridiales_Clostridiaceae_1_83_Clostridium sensu stricto_52                        |
| OTU_15547 | 7.07E-01 | 8.79E-01 | 9.96E-01 | 0.82 | 0.82 | Eisenbergiella_massiliensis_89         | Bacteria_Proteobacteria_57_Gammaproteobacteria_57_Enterobacteriales_57_Enterobacteriaceae_56_Pseudescherichia_51     |
| OTU_16253 | 8.85E-01 | 8.85E-01 | 8.73E-01 | 0.14 | 0.16 | Kosakonia_cowanii_98                   | Bacteria_Proteobacteria_Gammaproteobacteria_Enterobacteriales_Enterobacteriaceae_90_Kosakonia_35                     |
| OTU_2073  | 7.70E-01 | 6.04E-01 | 3.48E-02 | 0.37 | 0.83 | Escherichia_albertii_92                | Bacteria_Proteobacteria_85_Gammaproteobacteria_85_Enterobacteriales_85_Enterobacteriaceae_82_Pseudescherichia_69     |
| OTU_2084  | 9.06E-01 | 8.36E-01 | 6.43E-01 | 0.33 | 0.25 | Anaerobutyricum_hallii_95              | Bacteria_Firmicutes_Clostridia_Clostridiales_Lachnospiraceae_Clostridium XIVa_67                                     |
| OTU_2108  | 9.48E-01 | 7.80E-01 | 2.03E-03 | 0.38 | 1.40 | Bacteroides_thetaiotaomicron_100       | Bacteria_Bacteroidetes_Bacteroidia_Bacteroidales_Bacteroidaceae_Bacteroides_100                                      |
| OTU_4139  | 9.37E-01 | 6.06E-01 | 4.19E-01 | 0.77 | 1.14 | Lachnodostridium_pacense_96            | Bacteria_Firmicutes_Clostridia_Clostridiales_Lachnospiraceae_Clostridium XIVa_46                                     |
| OTU_4521  | 7.07E-01 | 8.10E-01 | 2.68E-03 | 0.17 | 1.16 | Enterococcus_faecalis_89               | Bacteria_Firmicutes_Bacilli_40_Lactobacillales_35_Carnobacteriaceae_25_Catellibacillus_17                            |
| OTU_4746  | 7.57E-01 | 8.65E-01 | 8.10E-01 | 1.05 | 0.97 | Ruminococcus_gnavus_92                 | Bacteria_Firmicutes_87_Clostridia_87_Clostridiales_87_Lachnospiraceae_87_Murimonas_10                                |
| OTU_5128  | 7.07E-01 | 7.16E-01 | 2.49E-01 | 1.19 | 0.75 | Pseudescherichia_vulneris_99           | Bacteria_Proteobacteria_97_Gammaproteobacteria_97_Enterobacteriales_97_Enterobacteriaceae_97_Pseudescherichia_84     |
| OTU_5378  | 7.07E-01 | 6.04E-01 | 1.35E-02 | 1.28 | 0.44 | Enterococcus_hirae_97                  | Bacteria_Firmicutes_Bacilli_99_Lactobacillales_98_Enterococcaceae_87_Vagococcus_22                                   |
| OTU_53900 | 8.48E-01 | 6.04E-01 | 4.97E-02 | 0.43 | 1.10 | Enterococcus_faecalis_98               | Bacteria_Firmicutes_Bacilli_Lactobacillales_Enterococcaceae_96_Enterococcus_61                                       |
| OTU_5430  | 9.87E-01 | 6.57E-01 | 2.45E-04 | 1.91 | 0.21 | Parabacteroides_distasonis_95          | Bacteria_Bacteroidetes_Bacteroidia_Bacteroidales_Porphyromonadaceae_87_Parabacteroides_87                            |
| OTU_64440 | 8.31E-01 | 6.04E-01 | 8.75E-01 | 0.90 | 0.85 | Enterococcus_faecalis_97               | Bacteria_Firmicutes_Bacilli_Lactobacillales_Enterococcaceae_84_Enterococcus_44                                       |
| OTU_64916 | 7.07E-01 | 8.68E-01 | 8.70E-02 | 1.85 | 0.13 | Bacteroides_eggerthii_95               | Bacteria_Bacteroidetes_Bacteroidia_Bacteroidales_Bacteroidaceae_Bacteroides_99                                       |
| OTU_67857 | 8.16E-01 | 8.68E-01 | 6.82E-02 | 0.55 | 1.00 | Enterococcus_faecalis_98               | Bacteria_Firmicutes_Bacilli_Lactobacillales_Enterococcaceae_99_Enterococcus_72                                       |
| OTU_862   | 7.07E-01 | 6.04E-01 | 2.45E-01 | 0.30 | 1.65 | Veillonella_dispar_89                  | Bacteria_Firmicutes_98_Negativicutes_94_Veillonellales_63_Veillonellaceae_63_Veillonella_60                          |
| OTU_1255  | 9.66E-01 | 6.04E-01 | 1.16E-01 | 1.78 | 0.39 | Enterococcus_dispar_94                 | Bacteria_Firmicutes_Bacilli_65_Lactobacillales_65_Enterococcaceae_43_Melissococcus_42                                |
| OTU_1790  | 7.07E-01 | 8.14E-01 | 6.44E-03 | 1.37 | 0.19 | Bacteroides_thetaiotaomicron_97        | Bacteria_Bacteroidetes_Bacteroidia_Bacteroidales_Bacteroidaceae_Bacteroides_100                                      |
| OTU_1929  | 8.25E-01 | 6.04E-01 | 3.10E-01 | 1.26 | 0.61 | Enterocloster_citroniae_97             | Bacteria_Firmicutes_94_Clostridia_94_Clostridiales_94_Lachnospiraceae_94_Enterocloster_55                            |
| OTU_35767 | 9.08E-01 | 6.04E-01 | 3.93E-04 | 1.84 | 0.35 | Bacteroides_xylanisolvans_98           | Bacteria_Bacteroidetes_Bacteroidia_Bacteroidales_Bacteroidaceae_Bacteroides_100                                      |
| OTU_37876 | 7.93E-01 | 6.04E-01 | 1.57E-01 | 1.35 | 0.46 | Fusobacterium_mortiferum_90            | Bacteria_Fusobacteria_78_Fusobacteriia_78_Fusobacteriales_78_Fusobacteriaceae_78_Cetobacterium_52                    |
| OTU_3855  | 7.57E-01 | 7.08E-01 | 1.35E-02 | 0.29 | 1.58 | Veillonella_dispar_98                  | Bacteria_Firmicutes_58_Negativicutes_58_Selenomonadales_28_Sporomusaceae_26_Anaerosinus_19                           |
| OTU_3953  | 8.25E-01 | 6.04E-01 | 3.42E-02 | 0.41 | 1.54 | Erysipelatoclostridium_amosum_88       | Bacteria_Firmicutes_Erysipelotrichia_96_Erysipelotrichales_96_Erysipelatoclostridiaceae_95_Erysipelatoclostridium_95 |
| OTU_4280  | 7.11E-01 | 6.04E-01 | 2.01E-01 | 1.05 | 0.64 | Enterococcus_faecalis_90               | Bacteria_Proteobacteria_63_Gammaproteobacteria_63_Enterobacteriales_59_Enterobacteriaceae_58_Pseudescherichia_55     |
| OTU_4770  | 7.07E-01 | 8.14E-01 | 4.37E-02 | 1.59 | 0.75 | Roseburia_inulinivorans_96             | Bacteria_Firmicutes_Clostridia_Clostridiales_Lachnospiraceae_Roseburia_76                                            |
| OTU_5079  | NA       | 6.65E-01 | 1.10E-01 | 0.00 | 2.03 | Piscinibacterium_candidicorallinum_96  | Bacteria_Proteobacteria_Betaproteobacteria_Nitrosomonadales_43_Sterolibacteriaceae_43_Methyloversatilis_43           |
| OTU_578   | 8.29E-01 | 7.31E-01 | 5.25E-02 | 2.05 | 0.03 | Prevotella_stercora_92                 | Bacteria_Bacteroidetes_Bacteroidia_Bacteroidales_Prevotellaceae_Prevotella_91                                        |
| OTU_610   | 9.08E-01 | 6.14E-01 | 1.19E-01 | 2.02 | 0.32 | Acetivibrio_clariflavus_88             | Bacteria_Firmicutes_99_Clostridia_99_Clostridiales_99_Ruminococcaceae_68_Flintibacter_9                              |
| OTU_65820 | 7.07E-01 | 8.02E-01 | 9.69E-01 | 0.77 | 0.76 | Pseudescherichia_vulneris_90           | Bacteria_Proteobacteria_83_Gammaproteobacteria_83_Enterobacteriales_82_Enterobacteriaceae_79_Pseudescherichia_78     |
| OTU_70560 | 7.07E-01 | 8.79E-01 | 1.45E-01 | 0.95 | 0.29 | Veillonella_denticariosi_98            | Bacteria_Firmicutes_Negativicutes_Veillonellales_Veillonellaceae_Veillonella_100                                     |
| OTU_74210 | 7.93E-01 | 7.07E-01 | 7.65E-02 | 0.48 | 0.10 | Bifidobacterium_stercoris_98           | Bacteria_Actinobacteria_Actinobacteria_Bifidobacteriales_Bifidobacteriaceae_Bifidobacterium_90                       |
| OTU_75428 | 9.87E-01 | 9.90E-01 | 2.04E-02 | 0.68 | 1.26 | Shigella_dysenteriae_96                | Bacteria_Proteobacteria_Gammaproteobacteria_Enterobacteriales_Enterobacteriaceae_Escherichia/Shigella_62             |
| OTU_7999  | 7.57E-01 | 6.04E-01 | 8.23E-02 | 0.57 | 1.24 | Senegalimassilia_anaerobia_96          | Bacteria_Actinobacteria_95_Coriobacteriia_95_Coriobacteriales_95_Coriobacteriaceae_95_Senegalimassilia_95            |
| OTU_8064  | 7.07E-01 | 6.04E-01 | 6.60E-01 | 0.76 | 0.89 | Enterococcus_faecalis_93               | Bacteria_Firmicutes_Bacilli_58_Lactobacillales_57_Carnobacteriaceae_37_Catellibacillus_21                            |
| OTU_83297 | 7.07E-01 | 6.63E-01 | 4.34E-01 | 1.36 | 0.70 | Pseudescherichia_vulneris_91           | Bacteria_Proteobacteria_Gammaproteobacteria_53_Enterobacteriales_53_Enterobacteriaceae_53_Pseudescherichia_53        |



|           |          |          |          |      |      |                                        |                                                                                                                      |
|-----------|----------|----------|----------|------|------|----------------------------------------|----------------------------------------------------------------------------------------------------------------------|
| OTU_8764  | 9.87E-01 | 6.72E-01 | 6.29E-01 | 1.10 | 0.92 | Kineothrix_allysoides_94               | Bacteria_Firmicutes_Clostridia_Clostridiales_Lachnospiraceae_Clostridium_XIVa_45                                     |
| OTU_95620 | 9.92E-01 | 7.65E-01 | 1.25E-01 | 0.28 | 2.07 | Kineothrix_allysoides_97               | Bacteria_Firmicutes_Clostridia_Clostridiales_Lachnospiraceae_Kineothrix_52                                           |
| OTU_11406 | 7.07E-01 | 7.31E-01 | 2.34E-01 | 1.08 | 0.44 | Bacteroides_xylanisolvans_97           | Bacteria_Bacteroidetes_Bacteroidia_Bacteroidales_Bacteroidaceae_Bacteroides_99                                       |
| OTU_11575 | 8.06E-01 | 6.10E-01 | 1.70E-02 | 1.21 | 0.28 | Pseudoscherichia_vulneris_97           | Bacteria_Proteobacteria_94_Gammaproteobacteria_94_Enterobacterales_94_Enterobacteriaceae_93_Pseudoscherichia_82      |
| OTU_1170  | 7.85E-01 | 7.55E-01 | 3.22E-02 | 1.88 | 0.23 | Clostridium_perfringens_98             | Bacteria_Firmicutes_Clostridia_74_Clostridiales_74_Clostridiaceae_1_74_Sarcina_46                                    |
| OTU_13023 | 7.07E-01 | 6.39E-01 | 1.01E-02 | 1.98 | 0.07 | Bacteroides_stercoris_98               | Bacteria_Bacteroidetes_92_Bacteroidia_92_Bacteroidales_92_Bacteroidaceae_90_Bacteroides_71                           |
| OTU_1608  | 8.77E-01 | 6.04E-01 | 2.08E-02 | 1.71 | 0.34 | Kineothrix_allysoides_97               | Bacteria_Firmicutes_Clostridia_Clostridiales_Lachnospiraceae_Kineothrix_45                                           |
| OTU_1752  | 8.85E-01 | 9.95E-01 | 1.07E-01 | 1.31 | 0.70 | Intestinibacter_bartlettii_89          | Bacteria_Bacteroidetes_79_Bacteroidia_79_Bacteroidales_79_Bacteroidaceae_78_Mediterranea_55                          |
| OTU_2142  | 9.59E-01 | 6.04E-01 | 9.61E-01 | 0.71 | 0.72 | Senegalimassilia_anaerobia_97          | Bacteria_Actinobacteria_Coribacteriia_Coribacteriales_Coribacteriaceae_Senegalimassilia_100                          |
| OTU_22056 | 9.96E-01 | 8.50E-01 | 6.37E-01 | 0.69 | 0.80 | Enterococcus_faecalis_98               | Bacteria_Firmicutes_Bacilli_Lactobacillales_Enterococcaceae_99_Enterococcus_93                                       |
| OTU_2252  | NA       | 7.58E-01 | 1.27E-02 | 0.00 | 1.37 | Pseudoscherichia_vulneris_99           | Bacteria_Proteobacteria_Gammaproteobacteria_98_Enterobacterales_97_Enterobacteriaceae_97_Pseudoscherichia_66         |
| OTU_31210 | 8.26E-01 | 9.12E-01 | 8.37E-02 | 0.56 | 1.74 | Bacteroides_thetaiotaomicron_97        | Bacteria_Bacteroidetes_Bacteroidia_Bacteroidales_Bacteroidaceae_Bacteroides_100                                      |
| OTU_3937  | 7.57E-01 | 9.80E-01 | 1.46E-02 | 0.31 | 1.52 | Phascolarctobacterium_faecium_97       | Bacteria_Firmicutes_Negativicutes_Acidaminococcales_Acidaminococcaceae_Phascolarctobacterium_100                     |
| OTU_463   | 9.23E-01 | 6.04E-01 | 3.74E-02 | 1.57 | 0.30 | Treponema_succinifaciens_87            | Bacteria_Spirochaetes_64_Spirochaetia_64_Spirochaetales_64_Spirochaetaceae_64_Rectinema_23                           |
| OTU_4664  | 8.33E-01 | 6.04E-01 | 1.94E-02 | 2.09 | 0.16 | Roseburia_inulinivorans_94             | Bacteria_Firmicutes_Clostridia_Clostridiales_Lachnospiraceae_99_Roseburia_55                                         |
| OTU_4874  | 7.59E-01 | 6.04E-01 | 9.39E-01 | 0.07 | 0.07 | Kosakonia_oryzodophytica_88            | Bacteria_Firmicutes_77_Clostridia_77_Clostridiales_77_Lachnospiraceae_76_Fusicatenibacter_14                         |
| OTU_6367  | 9.31E-01 | 7.51E-01 | 1.66E-01 | 0.50 | 1.06 | Enterocloster_clostridioformis_94      | Bacteria_Firmicutes_Clostridia_Clostridiales_Lachnospiraceae_86_Enterocloster_81                                     |
| OTU_66961 | 9.65E-01 | 8.18E-01 | 2.50E-01 | 1.43 | 0.84 | Enterococcus_faecalis_91               | Bacteria_Firmicutes_93_Bacilli_66_Lactobacillales_63_Carnobacteriaceae_43_Catellibacterium_38                        |
| OTU_8132  | 9.38E-01 | 6.68E-01 | 4.05E-02 | 1.72 | 0.28 | Bacteroides_xylanisolvans_96           | Bacteria_Bacteroidetes_Bacteroidia_Bacteroidales_Bacteroidaceae_72_Bacteroides_71                                    |
| OTU_8428  | 7.07E-01 | 9.35E-01 | 2.86E-02 | 1.58 | 0.82 | Bacteroides_xylanisolvans_95           | Bacteria_Bacteroidetes_Bacteroidia_Bacteroidales_Bacteroidaceae_Bacteroides_98                                       |
| OTU_8433  | 9.92E-01 | 8.65E-01 | 5.96E-01 | 0.98 | 0.76 | Enterococcus_hirae_91                  | Bacteria_Proteobacteria_61_Gammaproteobacteria_61_Enterobacterales_60_Enterobacteriaceae_59_Pseudoscherichia_55      |
| OTU_984   | 8.13E-01 | 6.04E-01 | 3.35E-02 | 1.33 | 0.09 | Lactobacillus_johnsonii_96             | Bacteria_Firmicutes_Bacilli_Lactobacillales_Lactobacillaceae_Lactobacillus_60                                        |
| OTU_11215 | 8.67E-01 | 6.66E-01 | 1.44E-02 | 0.35 | 1.59 | Bacteroides_fragilis_95                | Bacteria_Bacteroidetes_52_Bacteroidia_52_Bacteroidales_52_Bacteroidaceae_52_Mediterranea_37                          |
| OTU_11774 | 9.08E-01 | 6.04E-01 | 1.77E-01 | 0.67 | 1.22 | Roseburia_inulinivorans_89             | Bacteria_Firmicutes_Erysipelotrichia_61_Erysipelotrichales_61_Erysipelatoclostridiaceae_61_Erysipelatoclostridium_61 |
| OTU_13677 | 9.99E-01 | 6.05E-01 | 1.38E-01 | 1.00 | 0.45 | Peptoniphilus_koenoenieniae_97         | Bacteria_Firmicutes_Clostridia_99_Clostridiales_99_Peptoniphilaceae_90_Peptoniphilus_76                              |
| OTU_1404  | 8.95E-01 | 6.64E-01 | 6.32E-02 | 0.29 | 1.53 | Bacteroides_fragilis_100               | Bacteria_Bacteroidetes_86_Bacteroidia_86_Bacteroidales_86_Bacteroidaceae_85_Bacteroides_56                           |
| OTU_14586 | 7.46E-01 | 6.50E-01 | 3.49E-01 | 0.65 | 1.35 | Kineothrix_allysoides_96               | Bacteria_Firmicutes_Clostridia_Clostridiales_Lachnospiraceae_Ruminococcus2_38                                        |
| OTU_15548 | 7.46E-01 | 6.50E-01 | 8.98E-01 | 0.74 | 0.79 | Veillonella_tobetsuensis_86            | Bacteria_Proteobacteria_80_Gammaproteobacteria_80_Enterobacterales_79_Enterobacteriaceae_78_Pseudoscherichia_78      |
| OTU_1632  | 9.78E-01 | 6.04E-01 | 3.31E-02 | 1.91 | 0.09 | Ruminococcus_bromii_94                 | Bacteria_Firmicutes_Clostridia_Clostridiales_Ruminococcaceae_91_Ruminococcus_72                                      |
| OTU_2159  | 7.07E-01 | 7.31E-01 | 9.21E-02 | 2.14 | 0.02 | Streptococcus_thermophilus_99          | Bacteria_Firmicutes_38_Bacilli_36_Lactobacillales_36_Enterococcaceae_21_Pilibacter_19                                |
| OTU_2957  | 7.10E-01 | 6.39E-01 | 3.89E-01 | 0.68 | 1.15 | Fusobacterium_nucleatum_100            | Bacteria_Fusobacteria_Fusobacteriia_Fusobacteriales_Fusobacteriaceae_Fusobacterium_100                               |
| OTU_32087 | 8.25E-01 | 9.61E-01 | 6.21E-01 | 0.88 | 1.04 | Pseudoscherichia_vulneris_96           | Bacteria_Proteobacteria_89_Gammaproteobacteria_89_Enterobacterales_89_Enterobacteriaceae_87_Pseudoscherichia_70      |
| OTU_3474  | 7.07E-01 | 9.54E-01 | 3.33E-04 | 2.14 | 0.17 | Bacteroides_finegoldii_96              | Bacteria_Bacteroidetes_Bacteroidia_Bacteroidales_Bacteroidaceae_Bacteroides_100                                      |
| OTU_3950  | 7.07E-01 | 6.04E-01 | 1.01E-01 | 0.48 | 1.33 | Pseudoscherichia_vulneris_89           | Bacteria_Proteobacteria_80_Gammaproteobacteria_80_Enterobacterales_80_Enterobacteriaceae_76_Pseudoscherichia_76      |
| OTU_4113  | 7.07E-01 | 7.40E-01 | 7.42E-02 | 1.21 | 0.38 | Bifidobacterium_catenuatum_95          | Bacteria_Actinobacteria_99_Actinobacteria_99_Bifidobacteriales_99_Bifidobacteriaceae_99_Bifidobacterium_67           |
| OTU_4522  | 8.06E-01 | 8.68E-01 | 4.00E-01 | 0.59 | 0.90 | Escherichia_albertii_90                | Bacteria_Proteobacteria_85_Gammaproteobacteria_85_Enterobacterales_85_Enterobacteriaceae_85_Pseudoscherichia_84      |
| OTU_4803  | 7.07E-01 | 8.63E-01 | 3.25E-01 | 0.81 | 1.10 | Escherichia_coli_97                    | Bacteria_Proteobacteria_Gammaproteobacteria_Enterobacterales_Enterobacteriaceae_Escherichia/Shigella_98              |
| OTU_4997  | 1.00E+00 | 9.59E-01 | 4.04E-03 | 0.56 | 1.42 | Gibbsiella_dentisursi_90               | Bacteria_Proteobacteria_Gammaproteobacteria_Enterobacterales_Enterobacteriaceae_Pseudoscherichia_94                  |
| OTU_5361  | 9.92E-01 | 6.14E-01 | 1.21E-02 | 1.91 | 0.08 | Prevotella_copri_97                    | Bacteria_Bacteroidetes_Bacteroidia_Bacteroidales_Prevotellaceae_Prevotella_100                                       |
| OTU_549   | 8.16E-01 | 7.31E-01 | 4.62E-02 | 2.43 | 0.03 | Ruminococcus_albus_97                  | Bacteria_Firmicutes_Clostridia_Clostridiales_Ruminococcaceae_Ruminococcus_98                                         |
| OTU_5699  | 7.11E-01 | 6.04E-01 | 1.32E-03 | 1.63 | 0.35 | Bacteroides_uniformis_96               | Bacteria_Bacteroidetes_Bacteroidia_Bacteroidales_Bacteroidaceae_Bacteroides_98                                       |
| OTU_13170 | 8.49E-01 | 7.97E-01 | 4.58E-01 | 0.82 | 1.08 | Ruminococcus_torques_96                | Bacteria_Firmicutes_Clostridia_Clostridiales_Lachnospiraceae_Coproccoccus_24                                         |
| OTU_1769  | 9.92E-01 | 7.46E-01 | 7.99E-03 | 1.18 | 0.14 | Butyricimonas_paravirosa_98            | Bacteria_Bacteroidetes_Bacteroidia_Bacteroidales_Odoribacteraceae_Butyricimonas_100                                  |
| OTU_1788  | 8.97E-01 | 8.71E-01 | 2.86E-01 | 0.61 | 0.96 | Dorea_longicatena_97                   | Bacteria_Firmicutes_Clostridia_Clostridiales_Lachnospiraceae_Dorea_70                                                |
| OTU_1961  | 8.06E-01 | 6.14E-01 | 1.44E-01 | 0.51 | 1.27 | Clostridium_perfringens_99             | Bacteria_Firmicutes_Negativicutes_54_Acidaminococcales_54_Acidaminococcaceae_54_Phascolarctobacterium_54             |
| OTU_22882 | 8.25E-01 | 9.52E-01 | 2.38E-02 | 1.23 | 0.55 | Flavonifractor_plautii_91              | Bacteria_Firmicutes_Clostridia_Clostridiales_Ruminococcaceae_80_Flavonifractor_80                                    |
| OTU_3150  | 7.75E-01 | 9.46E-01 | 6.77E-01 | 0.64 | 0.92 | Limosilactobacillus_mucosae_96         | Bacteria_Firmicutes_Bacilli_99_Lactobacillales_99_Lactobacillaceae_99_Limosilactobacillus_98                         |
| OTU_31908 | 9.38E-01 | 6.04E-01 | 2.15E-03 | 1.32 | 0.40 | Clostridium_perfringens_97             | Bacteria_Firmicutes_Clostridia_Clostridiales_Clostridiaceae_1_99_Clostridium_sensu_stricto_58                        |
| OTU_3357  | 7.07E-01 | 9.71E-01 | 7.26E-01 | 0.88 | 1.07 | Desulfovibrio_piger_96                 | Bacteria_Proteobacteria_Deltaproteobacteria_98_Desulfovibrionales_98_Desulfovibrionaceae_98_Desulfovibrio_75         |
| OTU_34435 | 9.77E-01 | 8.17E-01 | 2.15E-01 | 0.28 | 1.79 | Paeniclostridium_sordellii_100         | Bacteria_Firmicutes_Clostridia_Clostridiales_Peptostreptococcaceae_Paeniclostridium_100                              |
| OTU_37797 | 9.38E-01 | 9.33E-01 | 1.97E-03 | 1.95 | 0.09 | Bacteroides_caccae_97                  | Bacteria_Bacteroidetes_Bacteroidia_Bacteroidales_Bacteroidaceae_Bacteroides_100                                      |
| OTU_4342  | 9.92E-01 | 6.04E-01 | 4.89E-02 | 1.37 | 0.68 | Coprococcus_comes_95                   | Bacteria_Firmicutes_Clostridia_Clostridiales_Lachnospiraceae_Bariatricus_74                                          |
| OTU_4854  | 1.00E+00 | 8.28E-01 | 1.95E-02 | 0.10 | 0.57 | Gemmiger_forficilis_96                 | Bacteria_Firmicutes_Clostridia_Clostridiales_Ruminococcaceae_Gemmiger_75                                             |
| OTU_75340 | 8.82E-01 | 6.04E-01 | 5.37E-04 | 1.13 | 0.07 | Bacteroides_caccae_96                  | Bacteria_Bacteroidetes_Bacteroidia_Bacteroidales_Bacteroidaceae_Bacteroides_98                                       |
| OTU_12307 | 9.06E-01 | 6.04E-01 | 2.55E-02 | 1.43 | 0.16 | Phascolarctobacterium_succinatutens_96 | Bacteria_Firmicutes_Negativicutes_Acidaminococcales_Acidaminococcaceae_Phascolarctobacterium_100                     |
| OTU_13498 | 9.87E-01 | 9.46E-01 | 1.63E-02 | 1.36 | 0.21 | Bacteroides_uniformis_94               | Bacteria_Bacteroidetes_Bacteroidia_Bacteroidales_Bacteroidaceae_Phocaeicola_59                                       |
| OTU_1450  | 8.25E-01 | 6.04E-01 | 9.72E-01 | 0.22 | 0.21 | Flavonifractor_plautii_89              | Bacteria_Firmicutes_96_Clostridia_96_Clostridiales_96_Ruminococcaceae_96_Flavonifractor_95                           |
| OTU_2535  | 7.70E-01 | 6.10E-01 | 4.46E-01 | 1.18 | 0.67 | Romboutsia_timonensis_98               | Bacteria_Firmicutes_Clostridia_Clostridiales_Peptostreptococcaceae_Romboutsia_100                                    |
| OTU_2936  | 9.38E-01 | 6.04E-01 | 3.93E-01 | 1.08 | 0.76 | Peptoniphilus_tyrrelliae_96            | Bacteria_Firmicutes_Clostridia_Clostridiales_Peptoniphilaceae_Peptoniphilus_100                                      |
| OTU_33534 | 7.07E-01 | 6.59E-01 | 4.06E-01 | 0.73 | 0.99 | Enterococcus_faecalis_98               | Bacteria_Firmicutes_Bacilli_Lactobacillales_Enterococcaceae_Enterococcus_78                                          |
| OTU_3623  | 9.64E-01 | 6.04E-01 | 3.22E-02 | 1.25 | 0.54 | Escherichia_albertii_88                | Bacteria_Proteobacteria_53_Gammaproteobacteria_53_Enterobacterales_52_Enterobacteriaceae_52_Pseudoscherichia_52      |
| OTU_3838  | 8.48E-01 | 9.75E-01 | 9.41E-01 | 1.02 | 1.05 | Agathobacter_ruminis_93                | Bacteria_Firmicutes_70_Clostridia_70_Clostridiales_70_Lachnospiraceae_70_Bariatricus_31                              |
| OTU_4706  | 9.64E-01 | 7.44E-01 | 1.32E-01 | 0.60 | 1.03 | Enterococcus_faecalis_93               | Bacteria_Firmicutes_97_Bacilli_97_Lactobacillales_96_Carnobacteriaceae_63_Isobaculum_26                              |
| OTU_51171 | 1.00E+00 | 6.04E-01 | 1.84E-01 | 0.65 | 1.43 | Kineothrix_allysoides_97               | Bacteria_Firmicutes_Clostridia_Clostridiales_Lachnospiraceae_Kineothrix_22                                           |
| OTU_79888 | 7.57E-01 | 6.72E-01 | 3.65E-01 | 0.55 | 0.79 | Enterococcus_faecalis_98               | Bacteria_Firmicutes_Bacilli_Lactobacillales_Enterococcaceae_92_Enterococcus_84                                       |
| OTU_8078  | 7.57E-01 | 6.05E-01 | 2.56E-01 | 0.78 | 1.13 | Hungatella_hathewayi_97                | Bacteria_Firmicutes_Clostridia_Clostridiales_Lachnospiraceae_Hungatella_99                                           |

|                      | Significance for passage number (Model 1) |                     |
|----------------------|-------------------------------------------|---------------------|
|                      | pFDR<0.05 in MCG-3                        | pFDR<0.05 in MCG-3B |
| Number of OTUs       | 0                                         | 2                   |
| Percentage of OTUs   | 0.00%                                     | 0.09%               |
| Total number of OTUs | 2336                                      |                     |

Number and percentage of total OTUs significantly affected by passage number

|                      | Significance for NDG presence (Model 2) |           |            |
|----------------------|-----------------------------------------|-----------|------------|
|                      | pFDR<0.05                               | pFDR<0.01 | pFDR<0.001 |
| Number of OTUs       | 1070                                    | 535       | 226        |
| Percentage of OTUs   | 45.80%                                  | 22.90%    | 9.67%      |
| Total number of OTUs | 2336                                    |           |            |

Number and percentage of total OTUs significantly affected by NDG presence
